# Supplementary material for: High-throughput proteomic profiling of the fish liver following bacterial infection
Source: BMC Genomics. 2018 Oct 1;19:719. doi: 10.1186/s12864-018-5092-0 (PMC6167799; doi:10.1186/s12864-018-5092-0)
Supplement: Supplementary file 1 — Table S1. Results from BLASTp of Oncorhynchus mykiss protein sequences against Salmo salar and MaxQuant output after filtering contaminants, reverse sequences, proteins identified by site, and proteins with only 1 peptide for identification (3076 proteins). Table S2. Imputed protein abundance data after implementing all filtering criteria (2433 proteins). Table S3. Full statistical results from the linear model for each of the 2433 proteins included in the analysis. Table S4. Full results for GO Biological Process (GOBP) enrichment analysis. Table S5. Significantly different proteins that contribute to each significant GOBP term. Table S6. Significantly different proteins that contribute to each significant GO slim term. Table S7. Abbreviations and proteins annotations from STRING. (XLSX 3388 kb) [file 12864_2018_5092_MOESM1_ESM.xlsx]

## Sheet: Table S1
	S. salar RefSeq database information											S. salar BLASTp results												MaxQuant Raw Output
O. mykiss NCBI accession	gene id	transcript id	protein id	gene	pseudo	partial	product	protein length	trasncript length	aa longest	gene biotype	qseqid	sseqid	pident	length	mismatch	gapopen	qstart	qend	sstart	send	evalue	bitscore	Protein.IDs	Majority.protein.IDs	Peptide.counts..all.	Peptide.counts..razor.unique.	Peptide.counts..unique.	Fasta.headers	Number.of.proteins	Peptides	Razor...unique.peptides	Unique.peptides	Peptides.AS_L1	Peptides.AS_L10	Peptides.AS_L3	Peptides.AS_L5	Peptides.AS_L6	Peptides.AS_L9	Peptides.PBS_L1	Peptides.PBS_L3	Peptides.PBS_L5	Peptides.PBS_L7	Peptides.PBS_L9	Razor...unique.peptides.AS_L1	Razor...unique.peptides.AS_L10	Razor...unique.peptides.AS_L3	Razor...unique.peptides.AS_L5	Razor...unique.peptides.AS_L6
XP_021411831.1	gene8022:100380859	XM_014194002.1	XP_014049477.1	LOC100380859	FALSE	FALSE	band 3 anion exchange protein	919	3813	1	protein_coding	XP_021411831.1	gi|929078204|ref|XP_014049477.1|	97.39	919	23	1	1	918	1	919	0	1815	XP_021411831.1band3anionexchangeproteinisoformX1[Oncorhynchusmykiss];XP_021478094.1anionexchangerisoformX1[Oncorhynchusmykiss]	XP_021411831.1band3anionexchangeproteinisoformX1[Oncorhynchusmykiss];XP_021478094.1anionexchangerisoformX1[Oncorhynchusmykiss]	6;5	6;5	6;5	;	2	6	6	6	6	5	5	6	3	4	4	5	4	5	4	6	5	5	6	3
XP_021411842.1	gene14198:100196215	NM_001141244.1	NP_001134716.1	ndka	FALSE	FALSE	Nucleoside diphosphate kinase A	152	655	1	protein_coding	XP_021411842.1	gi|213511196|ref|NP_001134716.1|	99.34	152	1	0	1	152	1	152	2e-86	316	XP_021411842.1nucleosidediphosphatekinaseBisoformX1[Oncorhynchusmykiss]	XP_021411842.1nucleosidediphosphatekinaseBisoformX1[Oncorhynchusmykiss]	7	5	5		1	7	5	5	7	7	5	6	6	7	5	6	6	7	7	5	5	3	4	4
XP_021411949.1	gene8072:106601713	XM_014194061.1	XP_014049536.1	carm1	FALSE	FALSE	coactivator-associated arginine methyltransferase 1	587	3425	1	protein_coding	XP_021411949.1	gi|929078323|ref|XP_014049535.1|	100	506	0	0	1	506	1	506	0	1063	XP_021411949.1histone-argininemethyltransferaseCARM1,partial[Oncorhynchusmykiss];XP_021481641.1histone-argininemethyltransferaseCARM1-like[Oncorhynchusmykiss]	XP_021411949.1histone-argininemethyltransferaseCARM1,partial[Oncorhynchusmykiss];XP_021481641.1histone-argininemethyltransferaseCARM1-like[Oncorhynchusmykiss]	2;1	2;1	2;1	;	2	2	2	2	1	2	2	2	2	1	1	2	1	1	1	1	2	2	2	2
XP_021411964.1	gene8018:106601652	XM_014193998.1	XP_014049473.1	LOC106601652	FALSE	FALSE	acylpyruvase FAHD1, mitochondrial-like	218	1346	1	protein_coding	XP_021411964.1	gi|929078196|ref|XP_014049473.1|	98.94	189	2	0	1	189	1	189	1e-109	393	XP_021411964.1acylpyruvaseFAHD1,mitochondrial-like,partial[Oncorhynchusmykiss];XP_021414346.1acylpyruvaseFAHD1,mitochondrial-like[Oncorhynchusmykiss];XP_021414345.1acylpyruvaseFAHD1,mitochondrial-like[Oncorhynchusmykiss];XP_021414342.1acylpyruvaseFAHD1,mitochondrial-like[Oncorhynchusmykiss]	XP_021411964.1acylpyruvaseFAHD1,mitochondrial-like,partial[Oncorhynchusmykiss];XP_021414346.1acylpyruvaseFAHD1,mitochondrial-like[Oncorhynchusmykiss];XP_021414345.1acylpyruvaseFAHD1,mitochondrial-like[Oncorhynchusmykiss];XP_021414342.1acylpyruvaseFAHD1,mitochondrial-like[Oncorhynchusmykiss]	4;4;4;4	4;4;4;4	4;4;4;4	;;;	4	4	4	4	4	4	4	4	4	4	4	4	4	4	4	4	4	4	4	4
XP_021411968.1	gene13306:106606656	XM_014202997.1	XP_014058472.1	LOC106606656	FALSE	FALSE	aminoacyl tRNA synthase complex-interacting multifunctional protein 2-like	210	781	1	protein_coding	XP_021411968.1	gi|929095253|ref|XP_014058472.1|	97.69	173	3	1	1	172	22	194	2e-84	310	XP_021411968.1aminoacyltRNAsynthasecomplex-interactingmultifunctionalprotein2-like[Oncorhynchusmykiss];XP_021481672.1aminoacyltRNAsynthasecomplex-interactingmultifunctionalprotein2-like[Oncorhynchusmykiss]	XP_021411968.1aminoacyltRNAsynthasecomplex-interactingmultifunctionalprotein2-like[Oncorhynchusmykiss];XP_021481672.1aminoacyltRNAsynthasecomplex-interactingmultifunctionalprotein2-like[Oncorhynchusmykiss]	6;4	6;4	6;4	;	2	6	6	6	5	6	5	6	5	6	5	4	5	6	5	5	6	5	6	5
XP_021411977.1	gene8180:106601810	XM_014194204.1	XP_014049679.1	LOC106601810	FALSE	FALSE	transducin beta-like protein 3	809	3237	1	protein_coding	XP_021411977.1	gi|929078624|ref|XP_014049679.1|	98.54	205	3	0	7	211	389	593	2e-116	416	XP_021411977.1transducinbeta-likeprotein3[Oncorhynchusmykiss];XP_021414421.1transducinbeta-likeprotein3[Oncorhynchusmykiss]	XP_021411977.1transducinbeta-likeprotein3[Oncorhynchusmykiss];XP_021414421.1transducinbeta-likeprotein3[Oncorhynchusmykiss]	2;2	2;2	2;2	;	2	2	2	2	1	2	1	2	2	2	2	1	2	2	1	1	2	1	2	2
XP_021412005.1	gene13139:106606479	XM_014202707.1	XP_014058182.1	trap1	FALSE	FALSE	TNF receptor-associated protein 1	782	3341	1	protein_coding	XP_021412005.1	gi|929094710|ref|XP_014058182.1|	74.78	785	97	11	1	687	1	782	0	1110	XP_021412005.1heatshockprotein75kDa,mitochondrial-like[Oncorhynchusmykiss];XP_021412008.1heatshockprotein75kDa,mitochondrial-like,partial[Oncorhynchusmykiss];XP_021414592.1heatshockprotein75kDa,mitochondrial-likeisoformX2[Oncorhynchusmykiss];XP_021414590.1heatshockprotein75kDa,mitochondrial-likeisoformX1[Oncorhynchusmykiss];XP_021448602.1heatshockprotein75kDa,mitochondrial-like,partial[Oncorhynch…	XP_021412005.1heatshockprotein75kDa,mitochondrial-like[Oncorhynchusmykiss];XP_021412008.1heatshockprotein75kDa,mitochondrial-like,partial[Oncorhynchusmykiss]	5;3;1;1;1	5;3;1;1;1	5;3;1;1;1	;	5	5	5	5	4	3	4	4	4	3	3	3	3	4	4	4	3	4	4	4
XP_021412032.1	gene59875:106596227	XM_014187537.1	XP_014043012.1	LOC106596227	FALSE	TRUE	acyl-CoA synthetase family member 2, mitochondrial-like	156	469	1	protein_coding	XP_021412032.1	gi|929323437|ref|XP_014043012.1|	96.15	156	6	0	8	163	1	156	8e-79	291	XP_021412032.1acyl-CoAsynthetasefamilymember2,mitochondrial-like[Oncorhynchusmykiss]	XP_021412032.1acyl-CoAsynthetasefamilymember2,mitochondrial-like[Oncorhynchusmykiss]	5	1	1		1	5	1	1	4	4	4	5	3	3	4	4	4	3	4	1	1	1	1	1
XP_021412051.1	gene12854:106606198	XM_014202328.1	XP_014057803.1	LOC106606198	FALSE	FALSE	cAMP-dependent protein kinase type I-alpha regulatory subunit-like	393	1345	1	protein_coding	XP_021412051.1	gi|929093995|ref|XP_014057803.1|	95.71	70	3	0	3	72	269	338	3e-33	138	XP_021412051.1cAMP-dependentproteinkinasetypeI-alpharegulatorysubunit-like,partial[Oncorhynchusmykiss]	XP_021412051.1cAMP-dependentproteinkinasetypeI-alpharegulatorysubunit-like,partial[Oncorhynchusmykiss]	3	1	1		1	3	1	1	2	2	2	3	3	3	2	2	2	2	2	1	1	1	1	1
XP_021412083.1	gene5402:101448032	XM_014185044.1	XP_014040519.1	LOC101448032	FALSE	FALSE	lysosomal alpha-mannosidase	945	3536	1	protein_coding	XP_021412083.1	gi|929070029|ref|XP_014040519.1|	83.53	935	70	7	1	851	11	945	0	1541	XP_021412083.1lysosomalalpha-mannosidase[Oncorhynchusmykiss];XP_021425933.1lysosomalalpha-mannosidase-likeisoformX2[Oncorhynchusmykiss];XP_021425932.1lysosomalalpha-mannosidase-likeisoformX1[Oncorhynchusmykiss]	XP_021412083.1lysosomalalpha-mannosidase[Oncorhynchusmykiss];XP_021425933.1lysosomalalpha-mannosidase-likeisoformX2[Oncorhynchusmykiss];XP_021425932.1lysosomalalpha-mannosidase-likeisoformX1[Oncorhynchusmykiss]	4;2;2	4;2;2	4;2;2	;;	3	4	4	4	4	4	4	4	4	4	4	4	4	4	4	4	4	4	4	4
XP_021412144.1	gene25123:106564267	XM_014130309.1	XP_013985784.1	tecr	FALSE	FALSE	trans-2,3-enoyl-CoA reductase	309	1459	1	protein_coding	XP_021412144.1	gi|929219251|ref|XP_013985784.1|	100	309	0	0	1	309	1	309	0	644	XP_021412144.1very-long-chainenoyl-CoAreductaseisoformX2[Oncorhynchusmykiss];XP_021412143.1very-long-chainenoyl-CoAreductaseisoformX1[Oncorhynchusmykiss];XP_021449676.1very-long-chainenoyl-CoAreductase-like[Oncorhynchusmykiss];XP_021440333.1very-long-chainenoyl-CoAreductase-like[Oncorhynchusmykiss];XP_021469813.1very-long-chainenoyl-CoAreductase-like[Oncorhynchusmykiss]	XP_021412144.1very-long-chainenoyl-CoAreductaseisoformX2[Oncorhynchusmykiss];XP_021412143.1very-long-chainenoyl-CoAreductaseisoformX1[Oncorhynchusmykiss];XP_021449676.1very-long-chainenoyl-CoAreductase-like[Oncorhynchusmykiss]	8;8;7;1;1	8;8;7;1;1	8;8;7;1;1	;;	5	8	8	8	7	8	8	8	8	7	8	8	5	8	8	7	8	8	8	8
XP_021412155.1	gene25122:100195906	NM_001140935.1	NP_001134407.1	ndub7	FALSE	FALSE	NADH dehydrogenase 1 beta subcomplex subunit 7	121	592	1	protein_coding	XP_021412155.1	gi|213512214|ref|NP_001134407.1|	98.35	121	2	0	1	121	1	121	4e-67	251	XP_021412155.1NADHdehydrogenase[ubiquinone]1betasubcomplexsubunit7-like[Oncorhynchusmykiss]	XP_021412155.1NADHdehydrogenase[ubiquinone]1betasubcomplexsubunit7-like[Oncorhynchusmykiss]	3	3	3		1	3	3	3	2	3	3	3	3	3	3	3	3	3	3	2	3	3	3	3
XP_021412190.1	gene5248:106592110	XM_014183416.1	XP_014038891.1	LOC106592110	FALSE	FALSE	far upstream element-binding protein 2-like	676	3460	1	protein_coding	XP_021412190.1	gi|929069647|ref|XP_014038912.1|	98.07	675	6	3	1	671	1	672	0	942	XP_021412190.1farupstreamelement-bindingprotein2-like[Oncorhynchusmykiss];XP_021412189.1farupstreamelement-bindingprotein2-like[Oncorhynchusmykiss];XP_021448308.1farupstreamelement-bindingprotein1-like[Oncorhynchusmykiss]	XP_021412190.1farupstreamelement-bindingprotein2-like[Oncorhynchusmykiss];XP_021412189.1farupstreamelement-bindingprotein2-like[Oncorhynchusmykiss]	9;8;1	9;8;1	7;6;1	;	3	9	9	7	7	8	6	8	5	7	5	5	7	7	7	7	8	6	8	5
XP_021412202.1	gene12190:106605532	XM_014201296.1	XP_014056771.1	LOC106605532	FALSE	FALSE	protein LYRIC-like	522	2675	1	protein_coding	XP_021412202.1	gi|929092026|ref|XP_014056771.1|	87.43	525	39	4	1	501	1	522	0	796	XP_021412202.1proteinLYRIC-likeisoformX9[Oncorhynchusmykiss];XP_021412193.1proteinLYRIC-likeisoformX8[Oncorhynchusmykiss];XP_021412187.1proteinLYRIC-likeisoformX7[Oncorhynchusmykiss];XP_021412178.1proteinLYRIC-likeisoformX6[Oncorhynchusmykiss];XP_021412174.1proteinLYRIC-likeisoformX5[Oncorhynchusmykiss];XP_021412166.1proteinLYRIC-likeisoformX4[Oncorhynchusmykiss];XP_021412160.1proteinLYRIC-likeis…	XP_021412202.1proteinLYRIC-likeisoformX9[Oncorhynchusmykiss];XP_021412193.1proteinLYRIC-likeisoformX8[Oncorhynchusmykiss];XP_021412187.1proteinLYRIC-likeisoformX7[Oncorhynchusmykiss];XP_021412178.1proteinLYRIC-likeisoformX6[Oncorhynchusmykiss];XP_021412174.1proteinLYRIC-likeisoformX5[Oncorhynchusmykiss];XP_021412166.1proteinLYRIC-likeisoformX4[Oncorhynchusmykiss];XP_021412160.1proteinLYRIC-likeis…	3;3;3;3;3;3;3;3;3	2;2;2;2;2;2;2;2;2	2;2;2;2;2;2;2;2;2	;;;;;;;;	9	3	2	2	3	2	2	2	3	3	3	3	1	3	1	2	2	2	2	2
XP_021412203.1	gene25166:100380448	NM_001173732.1	NP_001167203.1	p4k2a	FALSE	FALSE	Phosphatidylinositol 4-kinase type 2-alpha	446	2378	1	protein_coding	XP_021412203.1	gi|291190196|ref|NP_001167203.1|	99.36	157	1	0	27	183	172	328	1e-88	324	XP_021412203.1phosphatidylinositol4-kinasetype2-alpha-like,partial[Oncorhynchusmykiss]	XP_021412203.1phosphatidylinositol4-kinasetype2-alpha-like,partial[Oncorhynchusmykiss]	2	2	1		1	2	2	1	2	2	2	1	2	2	2	1	1	2	2	2	2	2	1	2
XP_021412244.1	gene5194:100380284	NM_001173569.1	NP_001167040.1	pcy2	FALSE	FALSE	Ethanolamine-phosphate cytidylyltransferase	401	3887	1	protein_coding	XP_021412244.1	gi|291190640|ref|NP_001167040.1|	98.25	401	7	0	1	401	1	401	0	827	XP_021412244.1ethanolamine-phosphatecytidylyltransferase-like[Oncorhynchusmykiss];XP_021414617.1ethanolamine-phosphatecytidylyltransferase-like[Oncorhynchusmykiss]	XP_021412244.1ethanolamine-phosphatecytidylyltransferase-like[Oncorhynchusmykiss]	5;2	5;2	5;2		2	5	5	5	4	5	5	5	3	3	3	5	4	3	3	4	5	5	5	3
XP_021412268.1	gene25206:106564358	XM_014130416.1	XP_013985891.1	LOC106564358	FALSE	FALSE	protein O-GlcNAcase-like	787	3122	1	protein_coding	XP_021412268.1	gi|929219460|ref|XP_013985891.1|	97.75	622	11	1	1	619	1	622	0	1251	XP_021412268.1proteinO-GlcNAcase-like[Oncorhynchusmykiss];XP_021412278.1proteinO-GlcNAcase-like[Oncorhynchusmykiss];XP_021423354.1proteinO-GlcNAcase-like,partial[Oncorhynchusmykiss]	XP_021412268.1proteinO-GlcNAcase-like[Oncorhynchusmykiss]	15;3;2	15;3;2	14;3;2		3	15	15	14	14	14	14	14	11	14	13	12	12	14	13	14	14	14	14	11
XP_021412277.1	gene5231:100196069	XM_014183254.1	XP_014038729.1	afmid	FALSE	FALSE	arylformamidase	308	1510	1	protein_coding	XP_021412277.1	gi|213511606|ref|NP_001134570.1|	96.77	93	3	0	1	93	202	294	5e-48	187	XP_021412277.1kynurenineformamidase-likeisoformX2[Oncorhynchusmykiss];XP_021412275.1kynurenineformamidase-likeisoformX1[Oncorhynchusmykiss];XP_021412274.1kynurenineformamidase-likeisoformX1[Oncorhynchusmykiss]	XP_021412277.1kynurenineformamidase-likeisoformX2[Oncorhynchusmykiss];XP_021412275.1kynurenineformamidase-likeisoformX1[Oncorhynchusmykiss];XP_021412274.1kynurenineformamidase-likeisoformX1[Oncorhynchusmykiss]	3;3;3	1;1;1	1;1;1	;;	3	3	1	1	3	3	3	3	3	3	3	3	3	3	3	1	1	1	1	1
XP_021412279.1	gene5231:100196069	XM_014183254.1	XP_014038729.1	afmid	FALSE	FALSE	arylformamidase	308	1510	1	protein_coding	XP_021412279.1	gi|213511606|ref|NP_001134570.1|	96.85	286	9	0	1	286	1	286	6e-161	565	XP_021412279.1kynurenineformamidase,partial[Oncorhynchusmykiss];XP_021426079.1kynurenineformamidase-like[Oncorhynchusmykiss]	XP_021412279.1kynurenineformamidase,partial[Oncorhynchusmykiss]	6;1	6;1	4;1		2	6	6	4	5	5	5	6	5	5	5	5	5	5	5	5	5	5	6	5
XP_021412285.1	gene5016:106590330	XM_014181218.1	XP_014036693.1	LOC106590330	FALSE	FALSE	heme oxygenase-like	297	1641	1	protein_coding	XP_021412285.1	gi|929069054|ref|XP_014036693.1|	98.84	259	3	0	1	259	39	297	7e-152	535	XP_021412285.1hemeoxygenase-likeisoformX3[Oncorhynchusmykiss];XP_021412283.1hemeoxygenase-likeisoformX2[Oncorhynchusmykiss];XP_021412282.1hemeoxygenase-likeisoformX1[Oncorhynchusmykiss]	XP_021412285.1hemeoxygenase-likeisoformX3[Oncorhynchusmykiss];XP_021412283.1hemeoxygenase-likeisoformX2[Oncorhynchusmykiss];XP_021412282.1hemeoxygenase-likeisoformX1[Oncorhynchusmykiss]	5;5;5	5;5;5	5;5;5	;;	3	5	5	5	4	4	5	5	4	4	5	5	5	4	5	4	4	5	5	4
XP_021412302.1	gene12201:106605545	XM_014201331.1	XP_014056806.1	LOC106605545	FALSE	FALSE	xylose isomerase-like	495	1928	1	protein_coding	XP_021412302.1	gi|929092090|ref|XP_014056806.1|	98.17	438	8	0	1	438	58	495	0	911	XP_021412302.1xyloseisomerase-likeisoformX1[Oncorhynchusmykiss];XP_021412310.1xyloseisomerase-likeisoformX2[Oncorhynchusmykiss]	XP_021412302.1xyloseisomerase-likeisoformX1[Oncorhynchusmykiss];XP_021412310.1xyloseisomerase-likeisoformX2[Oncorhynchusmykiss]	7;5	7;5	7;5	;	2	7	7	7	4	4	7	5	3	7	5	7	5	4	6	4	4	7	5	3
XP_021412317.1	gene25318:100196745	XM_014130565.1	XP_013986040.1	xpnpep1	FALSE	FALSE	X-prolyl aminopeptidase (aminopeptidase P) 1, soluble	626	2429	1	protein_coding	XP_021412317.1	gi|213514230|ref|NP_001135239.1|	97.28	626	13	1	1	622	1	626	0	1267	XP_021412317.1xaa-Proaminopeptidase1[Oncorhynchusmykiss];XP_021414859.1xaa-Proaminopeptidase1-like[Oncorhynchusmykiss];XP_021448593.1xaa-Proaminopeptidase1-like[Oncorhynchusmykiss];XP_021414832.1xaa-Proaminopeptidase1-like[Oncorhynchusmykiss];XP_021412316.1xaa-Proaminopeptidase1-like[Oncorhynchusmykiss]	XP_021412317.1xaa-Proaminopeptidase1[Oncorhynchusmykiss];XP_021414859.1xaa-Proaminopeptidase1-like[Oncorhynchusmykiss]	15;8;2;2;2	15;8;2;2;2	15;8;2;2;2	;	5	15	15	15	13	12	13	13	9	13	14	13	10	13	15	13	12	13	13	9
XP_021412335.1	gene5046:106590562	XM_014181675.1	XP_014037150.1	LOC106590562	FALSE	TRUE	complement C3-like	806	2452	1	protein_coding	XP_021412335.1	gi|929069135|ref|XP_014037150.1|	92.66	777	57	0	1	777	1	777	0	1511	XP_021412335.1complementC3-like[Oncorhynchusmykiss]	XP_021412335.1complementC3-like[Oncorhynchusmykiss]	11	11	10		1	11	11	10	9	7	8	8	8	11	7	7	7	9	8	9	7	8	8	8
XP_021412375.1	gene5060:106590712	XM_014181871.1	XP_014037346.1	LOC106590712	FALSE	TRUE	galectin-2-like	129	862	1	protein_coding	XP_021412375.1	gi|929069175|ref|XP_014037346.1|	94.57	129	7	0	1	129	1	129	5e-69	257	XP_021412375.1galectin-2-like[Oncorhynchusmykiss]	XP_021412375.1galectin-2-like[Oncorhynchusmykiss]	3	3	3		1	3	3	3	2	3	3	3	3	3	2	3	3	2	2	2	3	3	3	3
XP_021412386.1	gene5126:106591329	XM_014182544.1	XP_014038019.1	LOC106591329	FALSE	TRUE	aspartate aminotransferase, cytoplasmic-like	421	2226	1	protein_coding	XP_021412386.1	gi|929069360|ref|XP_014038021.1|	98.78	410	5	0	1	410	1	410	0	848	XP_021412386.1aspartateaminotransferase,cytoplasmic-like[Oncorhynchusmykiss];XP_021451746.1aspartateaminotransferase,cytoplasmic-like[Oncorhynchusmykiss];XP_021451745.1aspartateaminotransferase,cytoplasmic-like[Oncorhynchusmykiss]	XP_021412386.1aspartateaminotransferase,cytoplasmic-like[Oncorhynchusmykiss]	19;6;6	19;6;6	17;6;6		3	19	19	17	17	15	14	15	14	16	16	16	14	16	13	17	15	14	15	14
XP_021412387.1	gene5106:106591168	XM_014182364.1	XP_014037839.1	hoga1	FALSE	FALSE	4-hydroxy-2-oxoglutarate aldolase 1	335	1927	1	protein_coding	XP_021412387.1	gi|929069300|ref|XP_014037839.1|	98.37	184	3	0	1	184	152	335	9e-105	377	XP_021412387.14-hydroxy-2-oxoglutaratealdolase,mitochondrial-like[Oncorhynchusmykiss];XP_021414857.14-hydroxy-2-oxoglutaratealdolase,mitochondrial-like[Oncorhynchusmykiss]	XP_021412387.14-hydroxy-2-oxoglutaratealdolase,mitochondrial-like[Oncorhynchusmykiss];XP_021414857.14-hydroxy-2-oxoglutaratealdolase,mitochondrial-like[Oncorhynchusmykiss]	9;6	9;6	9;6	;	2	9	9	9	8	8	9	8	8	9	9	9	8	8	8	8	8	9	8	8
XP_021412388.1	gene5123:106591313	XM_014182528.1	XP_014038003.1	LOC106591313	FALSE	FALSE	4-hydroxy-2-oxoglutarate aldolase, mitochondrial-like	166	874	1	protein_coding	XP_021412388.1	gi|929069352|ref|XP_014038003.1|	99.17	121	1	0	1	121	1	121	8e-67	250	XP_021412388.14-hydroxy-2-oxoglutaratealdolase,mitochondrial-like[Oncorhynchusmykiss]	XP_021412388.14-hydroxy-2-oxoglutaratealdolase,mitochondrial-like[Oncorhynchusmykiss]	4	4	4		1	4	4	4	4	3	2	4	3	3	4	4	3	4	3	4	3	2	4	3
XP_021412395.1	gene5006:106590181	XM_014180923.1	XP_014036398.1	LOC106590181	FALSE	FALSE	gamma-adducin-like	695	5232	1	protein_coding	XP_021412395.1	gi|929068992|ref|XP_014036370.1|	98.71	695	9	0	1	695	1	695	0	1436	XP_021412395.1gamma-adducin-like[Oncorhynchusmykiss]	XP_021412395.1gamma-adducin-like[Oncorhynchusmykiss]	7	7	7		1	7	7	7	6	6	7	7	7	6	5	6	6	6	7	6	6	7	7	7
XP_021412419.1	gene4992:100306755	NM_001165294.1	NP_001158766.1	ap1m2	FALSE	FALSE	adaptor-related protein complex 1, mu 2 subunit	424	1627	1	protein_coding	XP_021412419.1	gi|259155409|ref|NP_001158766.1|	100	424	0	0	1	424	1	424	0	877	XP_021412419.1AP-1complexsubunitmu-2isoformX2[Oncorhynchusmykiss];XP_021412418.1AP-1complexsubunitmu-2isoformX1[Oncorhynchusmykiss];XP_021412417.1AP-1complexsubunitmu-2isoformX2[Oncorhynchusmykiss];XP_021412416.1AP-1complexsubunitmu-2isoformX1[Oncorhynchusmykiss];XP_021455380.1AP-1complexsubunitmu-1-like[Oncorhynchusmykiss]	XP_021412419.1AP-1complexsubunitmu-2isoformX2[Oncorhynchusmykiss];XP_021412418.1AP-1complexsubunitmu-2isoformX1[Oncorhynchusmykiss];XP_021412417.1AP-1complexsubunitmu-2isoformX2[Oncorhynchusmykiss];XP_021412416.1AP-1complexsubunitmu-2isoformX1[Oncorhynchusmykiss]	4;4;4;4;1	3;3;3;3;0	3;3;3;3;0	;;;	5	4	3	3	4	3	4	3	4	4	4	4	4	4	4	3	2	3	2	3
XP_021412505.1	gene25389:106564536	XM_014130667.1	XP_013986142.1	LOC106564536	FALSE	FALSE	putative RNA-binding protein Luc7-like 2	456	2884	1	protein_coding	XP_021412505.1	gi|929219926|ref|XP_013986142.1|	99.15	236	2	0	1	236	1	236	9e-137	486	XP_021412505.1putativeRNA-bindingproteinLuc7-like2[Oncorhynchusmykiss];XP_021423404.1putativeRNA-bindingproteinLuc7-like2[Oncorhynchusmykiss]	XP_021412505.1putativeRNA-bindingproteinLuc7-like2[Oncorhynchusmykiss];XP_021423404.1putativeRNA-bindingproteinLuc7-like2[Oncorhynchusmykiss]	3;3	3;3	2;2	;	2	3	3	2	2	3	2	3	2	3	3	2	2	2	3	2	3	2	3	2
XP_021412517.1	gene25400:106564548	XM_014130681.1	XP_013986156.1	LOC106564548	FALSE	TRUE	serine hydrolase-like protein	327	1985	1	protein_coding	XP_021412517.1	gi|929219952|ref|XP_013986156.1|	85.02	327	11	1	1	289	1	327	3e-152	536	XP_021412517.1serinehydrolase-likeproteinisoformX3[Oncorhynchusmykiss];XP_021423410.1serinehydrolase-likeproteinisoformX3[Oncorhynchusmykiss];XP_021423408.1serinehydrolase-likeproteinisoformX2[Oncorhynchusmykiss];XP_021412516.1serinehydrolase-likeproteinisoformX2[Oncorhynchusmykiss];XP_021423407.1serinehydrolase-likeproteinisoformX1[Oncorhynchusmykiss];XP_021412515.1serinehydrolase-likeproteiniso…	XP_021412517.1serinehydrolase-likeproteinisoformX3[Oncorhynchusmykiss];XP_021423410.1serinehydrolase-likeproteinisoformX3[Oncorhynchusmykiss];XP_021423408.1serinehydrolase-likeproteinisoformX2[Oncorhynchusmykiss];XP_021412516.1serinehydrolase-likeproteinisoformX2[Oncorhynchusmykiss];XP_021423407.1serinehydrolase-likeproteinisoformX1[Oncorhynchusmykiss];XP_021412515.1serinehydrolase-likeproteiniso…	2;2;2;2;2;2	2;2;2;2;2;2	2;2;2;2;2;2	;;;;;	6	2	2	2	2	1	1	1	1	2	1	2	1	1	2	2	1	1	1	1
XP_021412536.1	gene12123:106605398	XM_014200990.1	XP_014056465.1	LOC106605398	FALSE	FALSE	flotillin-1-like	426	3678	1	protein_coding	XP_021412536.1	gi|929091407|ref|XP_014056465.1|	99.53	426	2	0	1	426	1	426	0	860	XP_021412536.1flotillin-1-like[Oncorhynchusmykiss];XP_021412529.1flotillin-1-like[Oncorhynchusmykiss];XP_021448511.1flotillin-1-like[Oncorhynchusmykiss];XP_021416263.1flotillin-1[Oncorhynchusmykiss];XP_021427663.1flotillin-1-like[Oncorhynchusmykiss]	XP_021412536.1flotillin-1-like[Oncorhynchusmykiss];XP_021412529.1flotillin-1-like[Oncorhynchusmykiss];XP_021448511.1flotillin-1-like[Oncorhynchusmykiss]	12;12;10;1;1	12;12;10;1;1	12;12;10;1;1	;;	5	12	12	12	12	11	11	10	10	12	9	10	10	10	9	12	11	11	10	10
XP_021412554.1	gene25460:100380663	XM_014130762.1	XP_013986237.1	LOC100380663	FALSE	FALSE	myosin-11	1980	7118	1	protein_coding	XP_021412554.1	gi|929220104|ref|XP_013986240.1|	99.49	1945	10	0	1	1945	1	1945	0	3927	XP_021412554.1myosin-11-likeisoformX3[Oncorhynchusmykiss];XP_021412553.1myosin-11-likeisoformX2[Oncorhynchusmykiss];XP_021412552.1myosin-11-likeisoformX1[Oncorhynchusmykiss];XP_021481682.1myosin-9-like[Oncorhynchusmykiss]	XP_021412554.1myosin-11-likeisoformX3[Oncorhynchusmykiss];XP_021412553.1myosin-11-likeisoformX2[Oncorhynchusmykiss];XP_021412552.1myosin-11-likeisoformX1[Oncorhynchusmykiss]	22;22;22;2	20;20;20;1	1;1;1;0	;;	4	22	20	1	18	18	19	18	17	19	18	19	19	16	19	16	16	17	16	15
XP_021412563.1	gene4853:106588882	XM_014178395.1	XP_014033870.1	sec23b	FALSE	FALSE	Sec23 homolog B, COPII coat complex component	763	3490	1	protein_coding	XP_021412563.1	gi|929068568|ref|XP_014033870.1|	98.04	766	12	1	1	766	1	763	0	1564	XP_021412563.1proteintransportproteinSec23A[Oncorhynchusmykiss];XP_021423460.1proteintransportproteinSec23A-like[Oncorhynchusmykiss]	XP_021412563.1proteintransportproteinSec23A[Oncorhynchusmykiss];XP_021423460.1proteintransportproteinSec23A-like[Oncorhynchusmykiss]	15;14	14;13	14;13	;	2	15	14	14	14	14	14	13	14	13	12	13	13	12	12	13	13	13	12	13
XP_021412586.1	gene4815:106588647	XM_014177833.1	XP_014033308.1	LOC106588647	FALSE	FALSE	cytosolic purine 5'-nucleotidase-like	561	5587	1	protein_coding	XP_021412586.1	gi|929068468|ref|XP_014033308.1|	99.29	561	4	0	1	561	1	561	0	1169	XP_021412586.1cytosolicpurine5'-nucleotidase-likeisoformX1[Oncorhynchusmykiss];XP_021423440.1cytosolicpurine5'-nucleotidase-like[Oncorhynchusmykiss];XP_021412587.1cytosolicpurine5'-nucleotidase-likeisoformX2[Oncorhynchusmykiss];XP_021412588.1cytosolicpurine5'-nucleotidase-likeisoformX3[Oncorhynchusmykiss]	XP_021412586.1cytosolicpurine5'-nucleotidase-likeisoformX1[Oncorhynchusmykiss];XP_021423440.1cytosolicpurine5'-nucleotidase-like[Oncorhynchusmykiss];XP_021412587.1cytosolicpurine5'-nucleotidase-likeisoformX2[Oncorhynchusmykiss];XP_021412588.1cytosolicpurine5'-nucleotidase-likeisoformX3[Oncorhynchusmykiss]	13;12;10;8	13;12;10;8	8;7;5;4	;;;	4	13	13	8	11	12	12	12	12	11	13	13	12	13	12	11	12	12	12	12
XP_021412591.1	gene4841:106588782	XM_014178198.1	XP_014033673.1	LOC106588782	FALSE	FALSE	arsenite methyltransferase-like	392	3008	1	protein_coding	XP_021412591.1	gi|929068536|ref|XP_014033682.1|	95.01	381	19	0	1	381	1	381	0	747	XP_021412591.1arsenitemethyltransferase[Oncorhynchusmykiss]	XP_021412591.1arsenitemethyltransferase[Oncorhynchusmykiss]	3	3	3		1	3	3	3	3	3	3	3	3	3	3	3	3	3	3	3	3	3	3	3
XP_021412693.1	gene12113:106605406	XM_014201009.1	XP_014056484.1	LOC106605406	FALSE	FALSE	nectin-2-like	535	6448	1	protein_coding	XP_021412693.1	gi|929091447|ref|XP_014056485.1|	93.95	512	23	2	1	511	1	505	0	899	XP_021412693.1nectin-2-likeisoformX2[Oncorhynchusmykiss];XP_021412683.1nectin-2-likeisoformX1[Oncorhynchusmykiss]	XP_021412693.1nectin-2-likeisoformX2[Oncorhynchusmykiss];XP_021412683.1nectin-2-likeisoformX1[Oncorhynchusmykiss]	2;2	2;2	2;2	;	2	2	2	2	2	2	2	2	1	2	2	2	2	1	2	2	2	2	2	1
XP_021412722.1	gene4732:106587400	XM_014175758.1	XP_014031233.1	LOC106587400	FALSE	FALSE	lysozyme G-like	150	1057	1	protein_coding	XP_021412722.1	gi|929067996|ref|XP_014031233.1|	91.33	150	13	0	6	155	1	150	2e-75	279	XP_021412722.1lysozymeg-like[Oncorhynchusmykiss]	XP_021412722.1lysozymeg-like[Oncorhynchusmykiss]	2	2	2		1	2	2	2	2	2	1	2	1	1	2	2	1	2	2	2	2	1	2	1
XP_021412775.1	gene4694:100194931	XM_014173669.1	XP_014029144.1	plak	FALSE	FALSE	Junction plakoglobin	732	3151	1	protein_coding	XP_021412775.1	gi|213515326|ref|NP_001133432.1|	98.09	732	10	1	1	728	1	732	0	1483	XP_021412775.1junctionplakoglobin-like[Oncorhynchusmykiss];XP_021412774.1junctionplakoglobin-like[Oncorhynchusmykiss];XP_021412773.1junctionplakoglobin-like[Oncorhynchusmykiss];XP_021426140.1junctionplakoglobin-like[Oncorhynchusmykiss];XP_021480380.1junctionplakoglobin-like[Oncorhynchusmykiss]	XP_021412775.1junctionplakoglobin-like[Oncorhynchusmykiss];XP_021412774.1junctionplakoglobin-like[Oncorhynchusmykiss];XP_021412773.1junctionplakoglobin-like[Oncorhynchusmykiss];XP_021426140.1junctionplakoglobin-like[Oncorhynchusmykiss]	14;14;14;10;4	14;14;14;10;4	9;9;9;6;0	;;;	5	14	14	9	13	12	14	14	14	14	11	12	12	12	14	13	12	14	14	14
XP_021412790.1	gene4684:106587813	XM_014176460.1	XP_014031935.1	LOC106587813	FALSE	FALSE	keratin, type I cytoskeletal 13-like	434	1736	1	protein_coding	XP_021412790.1	gi|929068139|ref|XP_014031935.1|	99.08	327	3	0	1	327	108	434	0	666	XP_021412790.1keratin,typeIcytoskeletal13-likeisoformX2[Oncorhynchusmykiss];XP_021412789.1keratin,typeIcytoskeletal13-likeisoformX1[Oncorhynchusmykiss]	XP_021412790.1keratin,typeIcytoskeletal13-likeisoformX2[Oncorhynchusmykiss];XP_021412789.1keratin,typeIcytoskeletal13-likeisoformX1[Oncorhynchusmykiss]	2;2	2;2	2;2	;	2	2	2	2	2	2	1	2	2	2	2	2	2	2	2	2	2	1	2	2
XP_021412839.1	gene4656:106588089	XM_014176756.1	XP_014032231.1	LOC106588089	FALSE	FALSE	nicotinate-nucleotide pyrophosphorylase [carboxylating]-like	466	1840	1	protein_coding	XP_021412839.1	gi|929068227|ref|XP_014032231.1|	98.02	303	6	0	1	303	164	466	1e-176	617	XP_021412839.1nicotinate-nucleotidepyrophosphorylase[carboxylating]-likeisoformX2[Oncorhynchusmykiss];XP_021412838.1nicotinate-nucleotidepyrophosphorylase[carboxylating]-likeisoformX2[Oncorhynchusmykiss];XP_021412837.1nicotinate-nucleotidepyrophosphorylase[carboxylating]-likeisoformX2[Oncorhynchusmykiss];XP_021412836.1nicotinate-nucleotidepyrophosphorylase[carboxylating]-likeisoformX2[Oncorhynchu…	XP_021412839.1nicotinate-nucleotidepyrophosphorylase[carboxylating]-likeisoformX2[Oncorhynchusmykiss];XP_021412838.1nicotinate-nucleotidepyrophosphorylase[carboxylating]-likeisoformX2[Oncorhynchusmykiss];XP_021412837.1nicotinate-nucleotidepyrophosphorylase[carboxylating]-likeisoformX2[Oncorhynchusmykiss];XP_021412836.1nicotinate-nucleotidepyrophosphorylase[carboxylating]-likeisoformX2[Oncorhynchu…	8;8;8;8;8;7;3;2	8;8;8;8;8;7;3;2	8;8;8;8;8;7;3;2	;;;;;	8	8	8	8	7	8	7	8	8	7	6	8	7	5	8	7	8	7	8	8
XP_021412845.1	gene4654:106588090	XM_014176761.1	XP_014032236.1	LOC106588090	FALSE	FALSE	rho GDP-dissociation inhibitor 1-like	237	3424	1	protein_coding	XP_021412845.1	gi|929068237|ref|XP_014032236.1|	99.51	204	1	0	1	204	34	237	3e-118	422	XP_021412845.1rhoGDP-dissociationinhibitor1-likeisoformX2[Oncorhynchusmykiss];XP_021412844.1rhoGDP-dissociationinhibitor1-likeisoformX1[Oncorhynchusmykiss]	XP_021412845.1rhoGDP-dissociationinhibitor1-likeisoformX2[Oncorhynchusmykiss];XP_021412844.1rhoGDP-dissociationinhibitor1-likeisoformX1[Oncorhynchusmykiss]	8;7	8;7	2;2	;	2	8	8	2	8	8	5	6	5	7	5	5	5	6	6	8	8	5	6	5
XP_021412850.1	gene4650:106588093	XM_014176765.1	XP_014032240.1	p4hb	FALSE	FALSE	prolyl 4-hydroxylase, beta polypeptide	512	3300	1	protein_coding	XP_021412850.1	gi|929068245|ref|XP_014032240.1|	98.24	512	9	0	1	512	1	512	0	1021	XP_021412850.1proteindisulfide-isomerase-like[Oncorhynchusmykiss]	XP_021412850.1proteindisulfide-isomerase-like[Oncorhynchusmykiss]	26	26	8		1	26	26	8	26	26	24	24	26	26	25	26	26	26	26	26	26	24	24	26
XP_021412879.1	gene4638:106588225	XM_014177023.1	XP_014032498.1	LOC106588225	FALSE	FALSE	phosphoribosyl pyrophosphate synthase-associated protein 1-like	374	1957	1	protein_coding	XP_021412879.1	gi|929068308|ref|XP_014032513.1|	100	359	0	0	1	359	1	359	0	740	XP_021412879.1phosphoribosylpyrophosphatesynthase-associatedprotein1-likeisoformX2[Oncorhynchusmykiss];XP_021423740.1phosphoribosylpyrophosphatesynthase-associatedprotein1-like[Oncorhynchusmykiss];XP_021412878.1phosphoribosylpyrophosphatesynthase-associatedprotein1-likeisoformX1[Oncorhynchusmykiss];XP_021481058.1phosphoribosylpyrophosphatesynthase-associatedprotein1isoformX2[Oncorhynchusmykiss];X…	XP_021412879.1phosphoribosylpyrophosphatesynthase-associatedprotein1-likeisoformX2[Oncorhynchusmykiss];XP_021423740.1phosphoribosylpyrophosphatesynthase-associatedprotein1-like[Oncorhynchusmykiss];XP_021412878.1phosphoribosylpyrophosphatesynthase-associatedprotein1-likeisoformX1[Oncorhynchusmykiss];XP_021481058.1phosphoribosylpyrophosphatesynthase-associatedprotein1isoformX2[Oncorhynchusmykiss];X…	9;9;9;5;5;5;5;5	9;9;9;5;5;5;5;5	9;9;9;5;5;5;5;5	;;;;;;;	8	9	9	9	7	9	8	9	9	8	9	9	9	9	8	7	9	8	9	9
XP_021412888.1	gene25674:100380782	XM_014131412.1	XP_013986887.1	LOC100380782	FALSE	FALSE	peroxisomal acyl-coenzyme A oxidase 1	660	3894	1	protein_coding	XP_021412888.1	gi|929221315|ref|XP_013986887.1|	97.27	660	18	0	1	660	1	660	0	1340	XP_021412888.1peroxisomalacyl-coenzymeAoxidase1-likeisoformX1[Oncorhynchusmykiss];XP_021412889.1peroxisomalacyl-coenzymeAoxidase1-likeisoformX2[Oncorhynchusmykiss]	XP_021412888.1peroxisomalacyl-coenzymeAoxidase1-likeisoformX1[Oncorhynchusmykiss];XP_021412889.1peroxisomalacyl-coenzymeAoxidase1-likeisoformX2[Oncorhynchusmykiss]	31;29	31;29	13;12	;	2	31	31	13	31	30	30	28	27	28	30	28	26	28	31	31	30	30	28	27
XP_021412892.1	gene4627:106588309	XM_014177148.1	XP_014032623.1	srp68	FALSE	FALSE	signal recognition particle 68kDa	597	3451	1	protein_coding	XP_021412892.1	gi|929068338|ref|XP_014032623.1|	98.99	597	6	0	1	597	1	597	0	1228	XP_021412892.1signalrecognitionparticlesubunitSRP68-like[Oncorhynchusmykiss]	XP_021412892.1signalrecognitionparticlesubunitSRP68-like[Oncorhynchusmykiss]	12	12	2		1	12	12	2	11	11	11	12	11	11	11	10	10	10	11	11	11	11	12	11
XP_021412909.1	gene25689:106564896	XM_014131386.1	XP_013986861.1	LOC106564896	FALSE	FALSE	E3 ubiquitin/ISG15 ligase TRIM25-like	688	4886	1	protein_coding	XP_021412909.1	gi|929221275|ref|XP_013986866.1|	95.14	658	31	1	1	658	1	657	0	1312	XP_021412909.1E3ubiquitin/ISG15ligaseTRIM25-likeisoformX2[Oncorhynchusmykiss];XP_021412908.1E3ubiquitin/ISG15ligaseTRIM25-likeisoformX1[Oncorhynchusmykiss];XP_021423772.1E3ubiquitin/ISG15ligaseTRIM25-likeisoformX2[Oncorhynchusmykiss];XP_021423771.1E3ubiquitin/ISG15ligaseTRIM25-likeisoformX1[Oncorhynchusmykiss]	XP_021412909.1E3ubiquitin/ISG15ligaseTRIM25-likeisoformX2[Oncorhynchusmykiss];XP_021412908.1E3ubiquitin/ISG15ligaseTRIM25-likeisoformX1[Oncorhynchusmykiss];XP_021423772.1E3ubiquitin/ISG15ligaseTRIM25-likeisoformX2[Oncorhynchusmykiss];XP_021423771.1E3ubiquitin/ISG15ligaseTRIM25-likeisoformX1[Oncorhynchusmykiss]	6;6;4;4	6;6;4;4	6;6;4;4	;;;	4	6	6	6	6	6	6	3	5	5	5	5	6	6	5	6	6	6	3	5
XP_021412916.1	gene12105:106605416	XM_014201050.1	XP_014056525.1	LOC106605416	FALSE	FALSE	aromatic-L-amino-acid decarboxylase-like	482	4038	1	protein_coding	XP_021412916.1	gi|929091521|ref|XP_014056524.1|	99.79	482	1	0	1	482	1	482	0	1006	XP_021412916.1aromatic-L-amino-aciddecarboxylase-like[Oncorhynchusmykiss];XP_021448675.1aromatic-L-amino-aciddecarboxylase-like[Oncorhynchusmykiss]	XP_021412916.1aromatic-L-amino-aciddecarboxylase-like[Oncorhynchusmykiss];XP_021448675.1aromatic-L-amino-aciddecarboxylase-like[Oncorhynchusmykiss]	7;6	7;6	7;6	;	2	7	7	7	7	3	5	6	5	6	3	3	4	4	5	7	3	5	6	5
XP_021412922.1	gene4584:100306733	NM_001165272.1	NP_001158744.1	apoh	FALSE	FALSE	Beta-2-glycoprotein 1	350	1256	1	protein_coding	XP_021412922.1	gi|259155365|ref|NP_001158744.1|	83.83	334	54	0	91	424	16	349	2e-168	591	XP_021412922.1beta-2-glycoprotein1-like[Oncorhynchusmykiss]	XP_021412922.1beta-2-glycoprotein1-like[Oncorhynchusmykiss]	5	5	5		1	5	5	5	5	4	5	5	5	5	5	4	5	5	4	5	4	5	5	5
XP_021412923.1	gene4583:106585643	XM_014172063.1	XP_014027538.1	LOC106585643	FALSE	FALSE	beta-2-glycoprotein 1-like	356	1220	1	protein_coding	XP_021412923.1	gi|929067301|ref|XP_014027538.1|	98.03	356	7	0	1	356	1	356	0	720	XP_021412923.1beta-2-glycoprotein1-like[Oncorhynchusmykiss]	XP_021412923.1beta-2-glycoprotein1-like[Oncorhynchusmykiss]	2	2	1		1	2	2	1	1	2	1	1	1	2	1	2	1	1	1	1	2	1	1	1
XP_021412926.1	gene25703:106564882	XM_014131368.1	XP_013986843.1	LOC106564882	FALSE	FALSE	protein kinase C alpha type	694	6068	1	protein_coding	XP_021412926.1	gi|929221235|ref|XP_013986846.1|	94.57	681	29	1	1	681	1	673	0	1335	XP_021412926.1proteinkinaseCalphatype-likeisoformX2[Oncorhynchusmykiss];XP_021412925.1proteinkinaseCalphatype-likeisoformX1[Oncorhynchusmykiss];XP_021437864.1proteinkinaseCalphatype-like,partial[Oncorhynchusmykiss]	XP_021412926.1proteinkinaseCalphatype-likeisoformX2[Oncorhynchusmykiss];XP_021412925.1proteinkinaseCalphatype-likeisoformX1[Oncorhynchusmykiss]	8;7;2	8;7;2	3;2;0	;	3	8	8	3	8	7	7	6	7	7	6	7	6	7	6	8	7	7	6	7
XP_021412948.1	gene4561:100194981	NM_001140010.1	NP_001133482.1	tcpd	FALSE	FALSE	T-complex protein 1 subunit delta	534	1957	1	protein_coding	XP_021412948.1	gi|213514160|ref|NP_001133482.1|	99.81	534	1	0	1	534	1	534	0	1078	XP_021412948.1T-complexprotein1subunitdelta[Oncorhynchusmykiss];XP_021423809.1T-complexprotein1subunitdelta-like[Oncorhynchusmykiss]	XP_021412948.1T-complexprotein1subunitdelta[Oncorhynchusmykiss];XP_021423809.1T-complexprotein1subunitdelta-like[Oncorhynchusmykiss]	16;16	16;16	16;16	;	2	16	16	16	12	12	14	14	13	14	12	13	12	13	13	12	12	14	14	13
XP_021412977.1	gene4550:106585868	XM_014172587.1	XP_014028062.1	LOC106585868	FALSE	FALSE	malate dehydrogenase, cytoplasmic-like	350	1374	1	protein_coding	XP_021412977.1	gi|929067401|ref|XP_014028062.1|	99.7	332	1	0	2	333	19	350	0	686	XP_021412977.1malatedehydrogenase,cytoplasmic-likeisoformX2[Oncorhynchusmykiss];XP_021412976.1malatedehydrogenase,cytoplasmic-likeisoformX1[Oncorhynchusmykiss]	XP_021412977.1malatedehydrogenase,cytoplasmic-likeisoformX2[Oncorhynchusmykiss];XP_021412976.1malatedehydrogenase,cytoplasmic-likeisoformX1[Oncorhynchusmykiss]	12;12	2;2	2;2	;	2	12	2	2	12	12	12	12	12	12	12	12	12	12	12	2	2	2	2	2
XP_021412984.1	gene4543:106585917	XM_014172662.1	XP_014028137.1	LOC106585917	FALSE	FALSE	ras-related protein ORAB-1-like	202	1976	1	protein_coding	XP_021412984.1	gi|929067417|ref|XP_014028137.1|	100	202	0	0	1	202	1	202	4e-117	419	XP_021412984.1ras-relatedproteinORAB-1-like[Oncorhynchusmykiss];XP_021474499.1ras-relatedproteinRab-1B-like[Oncorhynchusmykiss];XP_021443194.1ras-relatedproteinRab-1A-like[Oncorhynchusmykiss];XP_021437718.1ras-relatedproteinRab-1A-like[Oncorhynchusmykiss]	XP_021412984.1ras-relatedproteinORAB-1-like[Oncorhynchusmykiss];XP_021474499.1ras-relatedproteinRab-1B-like[Oncorhynchusmykiss]	6;3;2;2	1;0;0;0	1;0;0;0	;	4	6	1	1	6	5	6	5	4	6	6	5	3	5	5	1	1	1	1	1
XP_021413017.1	gene4526:106586122	XM_014173017.1	XP_014028492.1	LOC106586122	FALSE	FALSE	vitamin D(3) 25-hydroxylase-like	491	2013	1	protein_coding	XP_021413017.1	gi|929067503|ref|XP_014028492.1|	94.89	489	25	0	1	489	1	489	0	941	XP_021413017.1vitaminD(3)25-hydroxylase-like[Oncorhynchusmykiss]	XP_021413017.1vitaminD(3)25-hydroxylase-like[Oncorhynchusmykiss]	6	1	1		1	6	1	1	5	5	5	3	5	5	5	3	4	1	1	1	1	1	0	0
XP_021413019.1	gene4524:106586139	XM_014173034.1	XP_014028509.1	LOC106586139	FALSE	FALSE	complement C3-like	1649	5136	1	protein_coding	XP_021413019.1	gi|929067507|ref|XP_014028509.1|	87.93	1657	187	5	1	1652	1	1649	0	2996	XP_021413019.1complementC3-like[Oncorhynchusmykiss]	XP_021413019.1complementC3-like[Oncorhynchusmykiss]	37	28	28		1	37	28	28	29	31	29	31	31	31	23	30	23	25	30	21	24	22	25	24
XP_021413025.1	gene25773:106564824	XM_014131256.1	XP_013986731.1	LOC106564824	FALSE	FALSE	catalase-like	524	2820	1	protein_coding	XP_021413025.1	gi|929221021|ref|XP_013986731.1|	96.37	524	19	0	1	524	1	524	0	1073	XP_021413025.1catalase-like[Oncorhynchusmykiss]	XP_021413025.1catalase-like[Oncorhynchusmykiss]	25	5	4		1	25	5	4	25	24	25	24	22	25	23	25	25	24	25	5	5	5	5	4
XP_021413051.1	gene12091:100380613	NM_001173898.1	NP_001167369.1	stea4	FALSE	FALSE	Metalloreductase STEAP4	503	2110	1	protein_coding	XP_021413051.1	gi|929091299|ref|XP_014056411.1|	94.18	481	27	1	1	481	1	480	0	887	XP_021413051.1metalloreductaseSTEAP4-like[Oncorhynchusmykiss];XP_021413043.1metalloreductaseSTEAP4-like[Oncorhynchusmykiss]	XP_021413051.1metalloreductaseSTEAP4-like[Oncorhynchusmykiss];XP_021413043.1metalloreductaseSTEAP4-like[Oncorhynchusmykiss]	10;10	1;1	1;1	;	2	10	1	1	9	10	10	10	10	10	10	8	9	8	8	1	1	1	1	1
XP_021413091.1	gene12091:100380613	NM_001173898.1	NP_001167369.1	stea4	FALSE	FALSE	Metalloreductase STEAP4	503	2110	1	protein_coding	XP_021413091.1	gi|929091299|ref|XP_014056411.1|	96.05	481	18	1	1	481	1	480	0	909	XP_021413091.1metalloreductaseSTEAP4[Oncorhynchusmykiss];XP_021413080.1metalloreductaseSTEAP4[Oncorhynchusmykiss];XP_021413071.1metalloreductaseSTEAP4[Oncorhynchusmykiss]	XP_021413091.1metalloreductaseSTEAP4[Oncorhynchusmykiss];XP_021413080.1metalloreductaseSTEAP4[Oncorhynchusmykiss];XP_021413071.1metalloreductaseSTEAP4[Oncorhynchusmykiss]	17;17;17	17;17;17	8;8;8	;;	3	17	17	8	14	16	15	16	15	15	15	13	14	11	12	14	16	15	16	15
XP_021413171.1	gene14294:106607442	XM_014204392.1	XP_014059867.1	LOC106607442	FALSE	FALSE	adenylosuccinate lyase-like	485	1922	1	protein_coding	XP_021413171.1	gi|929097770|ref|XP_014059867.1|	98.76	482	6	0	1	482	4	485	0	991	XP_021413171.1adenylosuccinatelyase-like[Oncorhynchusmykiss]	XP_021413171.1adenylosuccinatelyase-like[Oncorhynchusmykiss]	12	12	3		1	12	12	3	11	10	9	11	9	11	8	9	8	10	10	11	10	9	11	9
XP_021413174.1	gene14290:106607447	XM_014204401.1	XP_014059876.1	LOC106607447	FALSE	FALSE	cathepsin D-like	402	2073	1	protein_coding	XP_021413174.1	gi|929097787|ref|XP_014059876.1|	97.01	402	12	0	1	402	1	402	0	809	XP_021413174.1cathepsinD-like[Oncorhynchusmykiss];XP_021480223.1cathepsinD-like[Oncorhynchusmykiss]	XP_021413174.1cathepsinD-like[Oncorhynchusmykiss]	9;4	9;4	9;4		2	9	9	9	9	9	9	9	9	9	9	9	9	9	8	9	9	9	9	9
XP_021413219.1	gene14244:100286406	XM_014204457.1	XP_014059932.1	LOC100286406	FALSE	FALSE	collagen alpha-1(I) chain	1449	5803	1	protein_coding	XP_021413219.1	gi|929097893|ref|XP_014059932.1|	98.9	1449	16	0	1	1449	1	1449	0	2618	XP_021413219.1collagenalpha-1(I)chain-like[Oncorhynchusmykiss]	XP_021413219.1collagenalpha-1(I)chain-like[Oncorhynchusmykiss]	2	2	2		1	2	2	2	1	2	2	2	1	1	1	1	1	1	1	1	2	2	2	1
XP_021413249.1	gene7270:106600844	XM_014192551.1	XP_014048026.1	LOC106600844	FALSE	FALSE	coatomer subunit zeta-1-like	204	1678	1	protein_coding	XP_021413249.1	gi|929075485|ref|XP_014048029.1|	85.94	192	1	1	1	166	1	192	3e-90	329	XP_021413249.1coatomersubunitzeta-1-likeisoformX11[Oncorhynchusmykiss];XP_021413248.1coatomersubunitzeta-1-likeisoformX10[Oncorhynchusmykiss];XP_021413247.1coatomersubunitzeta-1-likeisoformX9[Oncorhynchusmykiss];XP_021413243.1coatomersubunitzeta-1-likeisoformX5[Oncorhynchusmykiss];XP_021413242.1coatomersubunitzeta-1-likeisoformX4[Oncorhynchusmykiss];XP_021480340.1coatomersubunitzeta-1-likeisoform…	XP_021413249.1coatomersubunitzeta-1-likeisoformX11[Oncorhynchusmykiss];XP_021413248.1coatomersubunitzeta-1-likeisoformX10[Oncorhynchusmykiss];XP_021413247.1coatomersubunitzeta-1-likeisoformX9[Oncorhynchusmykiss];XP_021413243.1coatomersubunitzeta-1-likeisoformX5[Oncorhynchusmykiss];XP_021413242.1coatomersubunitzeta-1-likeisoformX4[Oncorhynchusmykiss];XP_021480340.1coatomersubunitzeta-1-likeisoform…	3;3;3;3;3;2	3;3;3;3;3;2	1;1;1;1;1;1	;;;;;	6	3	3	1	3	1	2	3	1	3	1	0	1	1	0	3	1	2	3	1
XP_021413271.1	gene14215:106607494	XM_014204491.1	XP_014059966.1	LOC106607494	FALSE	FALSE	insulin-like growth factor 2 mRNA-binding protein 1	605	8122	1	protein_coding	XP_021413271.1	gi|929097966|ref|XP_014059968.1|	98.17	602	7	1	1	598	1	602	0	1185	XP_021413271.1insulin-likegrowthfactor2mRNA-bindingprotein1isoformX3[Oncorhynchusmykiss];XP_021413270.1insulin-likegrowthfactor2mRNA-bindingprotein1isoformX2[Oncorhynchusmykiss];XP_021413269.1insulin-likegrowthfactor2mRNA-bindingprotein1isoformX1[Oncorhynchusmykiss];XP_021480365.1insulin-likegrowthfactor2mRNA-bindingprotein1isoformX3[Oncorhynchusmykiss];XP_021480364.1insulin-likegrowthfactor2mRNA…	XP_021413271.1insulin-likegrowthfactor2mRNA-bindingprotein1isoformX3[Oncorhynchusmykiss];XP_021413270.1insulin-likegrowthfactor2mRNA-bindingprotein1isoformX2[Oncorhynchusmykiss];XP_021413269.1insulin-likegrowthfactor2mRNA-bindingprotein1isoformX1[Oncorhynchusmykiss];XP_021480365.1insulin-likegrowthfactor2mRNA-bindingprotein1isoformX3[Oncorhynchusmykiss];XP_021480364.1insulin-likegrowthfactor2mRNA…	5;5;5;4;4;4	5;5;5;4;4;4	5;5;5;4;4;4	;;;;;	6	5	5	5	3	3	3	4	3	3	2	4	3	3	4	3	3	3	4	3
XP_021413298.1	gene14192:106607509	XM_014204518.1	XP_014059993.1	LOC106607509	FALSE	FALSE	importin subunit beta-1	879	4480	1	protein_coding	XP_021413298.1	gi|929098013|ref|XP_014059994.1|	100	876	0	0	1	876	1	876	0	1812	XP_021413298.1importinsubunitbeta-1isoformX2[Oncorhynchusmykiss];XP_021413297.1importinsubunitbeta-1isoformX1[Oncorhynchusmykiss];XP_021481591.1importinsubunitbeta-1-like[Oncorhynchusmykiss]	XP_021413298.1importinsubunitbeta-1isoformX2[Oncorhynchusmykiss];XP_021413297.1importinsubunitbeta-1isoformX1[Oncorhynchusmykiss];XP_021481591.1importinsubunitbeta-1-like[Oncorhynchusmykiss]	14;14;11	14;14;11	14;14;11	;;	3	14	14	14	11	12	13	14	12	12	12	11	9	12	12	11	12	13	14	12
XP_021413313.1	gene7332:106600793	XM_014192460.1	XP_014047935.1	LOC106600793	FALSE	FALSE	putative all-trans-retinol 13,14-reductase	609	2582	1	protein_coding	XP_021413313.1	gi|929075297|ref|XP_014047935.1|	95.07	609	30	0	1	609	1	609	0	1211	XP_021413313.1putativeall-trans-retinol13,14-reductase[Oncorhynchusmykiss];XP_021480430.1putativeall-trans-retinol13,14-reductase[Oncorhynchusmykiss]	XP_021413313.1putativeall-trans-retinol13,14-reductase[Oncorhynchusmykiss]	17;7	17;7	17;7		2	17	17	17	15	15	16	13	15	15	15	14	13	14	14	15	15	16	13	15
XP_021413368.1	gene14136:106607277	XM_014204083.1	XP_014059558.1	LOC106607277	FALSE	FALSE	peptidyl-prolyl cis-trans isomerase FKBP10-like	565	2610	1	protein_coding	XP_021413368.1	gi|929097213|ref|XP_014059558.1|	98.58	565	7	1	1	564	1	565	0	1143	XP_021413368.1peptidyl-prolylcis-transisomeraseFKBP10-like[Oncorhynchusmykiss];XP_021480490.1peptidyl-prolylcis-transisomeraseFKBP10-like[Oncorhynchusmykiss]	XP_021413368.1peptidyl-prolylcis-transisomeraseFKBP10-like[Oncorhynchusmykiss];XP_021480490.1peptidyl-prolylcis-transisomeraseFKBP10-like[Oncorhynchusmykiss]	2;2	2;2	2;2	;	2	2	2	2	2	2	1	1	0	2	1	1	1	2	1	2	2	1	1	0
XP_021413372.1	gene14132:106607281	XM_014204088.1	XP_014059563.1	LOC106607281	FALSE	FALSE	ATP-citrate synthase	1130	4752	1	protein_coding	XP_021413372.1	gi|929097229|ref|XP_014059567.1|	99.54	1092	5	0	1	1092	1	1092	0	2251	XP_021413372.1ATP-citratesynthaseisoformX2[Oncorhynchusmykiss];XP_021413371.1ATP-citratesynthaseisoformX1[Oncorhynchusmykiss]	XP_021413372.1ATP-citratesynthaseisoformX2[Oncorhynchusmykiss];XP_021413371.1ATP-citratesynthaseisoformX1[Oncorhynchusmykiss]	45;45	45;45	2;2	;	2	45	45	2	44	43	41	39	30	42	38	41	34	44	40	44	43	41	39	30
XP_021413375.1	gene14131:100306871	NM_001165410.1	NP_001158882.1	cn37	FALSE	FALSE	2,3-cyclic-nucleotide 3-phosphodiesterase	681	3255	1	protein_coding	XP_021413375.1	gi|259155280|ref|NP_001158882.1|	89.13	699	54	5	1	695	1	681	0	1186	XP_021413375.12',3'-cyclic-nucleotide3'-phosphodiesterase-like[Oncorhynchusmykiss];XP_021413374.12',3'-cyclic-nucleotide3'-phosphodiesterase-like[Oncorhynchusmykiss];XP_021413373.12',3'-cyclic-nucleotide3'-phosphodiesterase-like[Oncorhynchusmykiss]	XP_021413375.12',3'-cyclic-nucleotide3'-phosphodiesterase-like[Oncorhynchusmykiss];XP_021413374.12',3'-cyclic-nucleotide3'-phosphodiesterase-like[Oncorhynchusmykiss];XP_021413373.12',3'-cyclic-nucleotide3'-phosphodiesterase-like[Oncorhynchusmykiss]	5;5;5	5;5;5	4;4;4	;;	3	5	5	4	3	3	3	4	4	3	3	2	2	2	3	3	3	3	4	4
XP_021413378.1	gene52761:106596195	XM_014187508.1	XP_014042983.1	LOC106596195	FALSE	FALSE	heat shock 70 kDa protein	644	2705	1	protein_coding	XP_021413378.1	gi|929319182|ref|XP_014042983.1|	98.22	338	6	0	1	338	307	644	0	687	XP_021413378.1heatshock70kDaprotein-like[Oncorhynchusmykiss];XP_021448667.1heatshock70kDaprotein-like[Oncorhynchusmykiss];XP_021413385.1heatshock70kDaprotein-like[Oncorhynchusmykiss]	XP_021413378.1heatshock70kDaprotein-like[Oncorhynchusmykiss];XP_021448667.1heatshock70kDaprotein-like[Oncorhynchusmykiss];XP_021413385.1heatshock70kDaprotein-like[Oncorhynchusmykiss]	2;1;1	2;1;1	2;1;1	;;	3	2	2	2	1	2	1	1	1	1	1	1	1	2	1	1	2	1	1	1
XP_021413399.1	gene14107:106607302	XM_014204134.1	XP_014059609.1	LOC106607302	FALSE	FALSE	myosin light chain kinase, smooth muscle-like	884	4130	1	protein_coding	XP_021413399.1	gi|929097308|ref|XP_014059609.1|	96.84	885	27	1	1	885	1	884	0	1736	XP_021413399.1myosinlightchainkinase,smoothmuscle-likeisoformX1[Oncorhynchusmykiss];XP_021413400.1myosinlightchainkinase,smoothmuscle-likeisoformX2[Oncorhynchusmykiss];XP_021480533.1myosinlightchainkinase,smoothmuscle-like[Oncorhynchusmykiss]	XP_021413399.1myosinlightchainkinase,smoothmuscle-likeisoformX1[Oncorhynchusmykiss];XP_021413400.1myosinlightchainkinase,smoothmuscle-likeisoformX2[Oncorhynchusmykiss];XP_021480533.1myosinlightchainkinase,smoothmuscle-like[Oncorhynchusmykiss]	10;8;5	10;8;5	10;8;5	;;	3	10	10	10	9	8	8	10	9	6	9	6	10	8	9	9	8	8	10	9
XP_021413422.1	gene7425:106601135	XM_014193096.1	XP_014048571.1	LOC106601135	FALSE	FALSE	formin-like protein 1	1094	5347	1	protein_coding	XP_021413422.1	gi|929076497|ref|XP_014048570.1|	97.17	566	16	0	1	566	1	566	0	1120	XP_021413422.1formin-likeprotein1[Oncorhynchusmykiss];XP_021480560.1formin-likeprotein1[Oncorhynchusmykiss];XP_021420622.1formin-likeprotein1isoformX4[Oncorhynchusmykiss];XP_021420621.1formin-likeprotein1isoformX3[Oncorhynchusmykiss];XP_021420620.1formin-likeprotein1isoformX2[Oncorhynchusmykiss];XP_021420619.1formin-likeprotein1isoformX2[Oncorhynchusmykiss];XP_021420618.1formin-likeprotein1isofor…	XP_021413422.1formin-likeprotein1[Oncorhynchusmykiss];XP_021480560.1formin-likeprotein1[Oncorhynchusmykiss];XP_021420622.1formin-likeprotein1isoformX4[Oncorhynchusmykiss];XP_021420621.1formin-likeprotein1isoformX3[Oncorhynchusmykiss];XP_021420620.1formin-likeprotein1isoformX2[Oncorhynchusmykiss];XP_021420619.1formin-likeprotein1isoformX2[Oncorhynchusmykiss];XP_021420618.1formin-likeprotein1isofor…	2;2;1;1;1;1;1;1;1;1;1;1;1	2;2;1;1;1;1;1;1;1;1;1;1;1	2;2;1;1;1;1;1;1;1;1;1;1;1	;;;;;;;;;;;;	13	2	2	2	2	2	2	1	2	2	0	0	1	1	0	2	2	2	1	2
XP_021413430.1	gene14090:106607322	XM_014204173.1	XP_014059648.1	LOC106607322	FALSE	FALSE	uncharacterized LOC106607322	447	2622	1	protein_coding	XP_021413430.1	gi|929097378|ref|XP_014059648.1|	85.23	447	65	1	1	446	1	447	0	780	XP_021413430.1uncharacterizedproteinLOC110486287[Oncorhynchusmykiss]	XP_021413430.1uncharacterizedproteinLOC110486287[Oncorhynchusmykiss]	3	3	3		1	3	3	3	0	3	0	2	2	2	0	2	0	1	3	0	3	0	2	2
XP_021413529.1	gene7483:106601095	XM_014193014.1	XP_014048489.1	LOC106601095	FALSE	FALSE	insulin-like growth factor-binding protein complex acid labile subunit	600	2356	1	protein_coding	XP_021413529.1	gi|929076341|ref|XP_014048489.1|	98.33	600	9	1	1	599	1	600	0	1194	XP_021413529.1insulin-likegrowthfactor-bindingproteincomplexacidlabilesubunit[Oncorhynchusmykiss];XP_021480674.1insulin-likegrowthfactor-bindingproteincomplexacidlabilesubunit[Oncorhynchusmykiss]	XP_021413529.1insulin-likegrowthfactor-bindingproteincomplexacidlabilesubunit[Oncorhynchusmykiss];XP_021480674.1insulin-likegrowthfactor-bindingproteincomplexacidlabilesubunit[Oncorhynchusmykiss]	7;5	7;5	7;5	;	2	7	7	7	6	1	3	6	1	4	5	4	5	5	2	6	1	3	6	1
XP_021413546.1	gene14021:106607371	XM_014204289.1	XP_014059764.1	LOC106607371	FALSE	FALSE	hemoglobin subunit beta-1-like	147	593	1	protein_coding	XP_021413546.1	gi|929097583|ref|XP_014059764.1|	97.28	147	4	0	1	147	1	147	5e-80	295	XP_021413546.1hemoglobinsubunitbeta-1-like[Oncorhynchusmykiss]	XP_021413546.1hemoglobinsubunitbeta-1-like[Oncorhynchusmykiss]	8	3	0		1	8	3	0	8	8	8	8	8	8	7	8	8	8	8	3	3	3	3	3
XP_021413547.1	gene7502:106601078	XM_014192983.1	XP_014048458.1	LOC106601078	FALSE	FALSE	hemoglobin subunit alpha-like	143	580	1	protein_coding	XP_021413547.1	gi|929076279|ref|XP_014048458.1|	98.6	143	2	0	1	143	1	143	9e-77	283	XP_021413547.1hemoglobinsubunitalpha-like[Oncorhynchusmykiss]	XP_021413547.1hemoglobinsubunitalpha-like[Oncorhynchusmykiss]	6	1	1		1	6	1	1	5	5	4	6	4	6	6	6	5	6	6	1	1	1	1	0
XP_021413548.1	gene7498:100136576	NM_001123666.1	NP_001117138.1	LOC100136576	FALSE	TRUE	beta globin	148	747	1	protein_coding	XP_021413548.1	gi|185132519|ref|NP_001117138.1|	98.65	148	2	0	1	148	1	148	9e-83	303	XP_021413548.1hemoglobinsubunitbeta[Oncorhynchusmykiss]	XP_021413548.1hemoglobinsubunitbeta[Oncorhynchusmykiss]	12	1	1		1	12	1	1	12	12	12	12	12	12	12	12	12	12	12	1	1	1	1	1
XP_021413550.1	gene7503:106601076	XM_014192981.1	XP_014048456.1	LOC106601076	FALSE	FALSE	hemoglobin subunit alpha-4	143	642	1	protein_coding	XP_021413550.1	gi|929076275|ref|XP_014048456.1|	98.6	143	2	0	1	143	1	143	2e-79	293	XP_021413550.1hemoglobinsubunitalpha-4-like[Oncorhynchusmykiss];XP_021413558.1hemoglobinembryonicsubunitalpha-like[Oncorhynchusmykiss];XP_021481614.1hemoglobinembryonicsubunitalpha-like[Oncorhynchusmykiss]	XP_021413550.1hemoglobinsubunitalpha-4-like[Oncorhynchusmykiss]	7;1;1	2;0;0	2;0;0		3	7	2	2	7	6	6	7	6	7	6	7	7	7	7	2	2	2	2	2
XP_021413552.1	gene14015:106607383	XM_014204300.1	XP_014059775.1	LOC106607383	FALSE	TRUE	hemoglobin subunit alpha-like	143	553	1	protein_coding	XP_021413552.1	gi|929097604|ref|XP_014059775.1|	96.5	143	5	0	1	143	1	143	2e-70	262	XP_021413552.1hemoglobinsubunitalpha[Oncorhynchusmykiss]	XP_021413552.1hemoglobinsubunitalpha[Oncorhynchusmykiss]	10	10	6		1	10	10	6	10	10	9	10	10	10	10	10	10	10	10	10	10	9	10	10
XP_021413566.1	gene7525:106601057	XM_014192959.1	XP_014048434.1	LOC106601057	FALSE	FALSE	glucosidase 2 subunit beta-like	535	2327	1	protein_coding	XP_021413566.1	gi|929076231|ref|XP_014048434.1|	95.38	519	24	0	17	535	17	535	0	1001	XP_021413566.1glucosidase2subunitbeta-likeisoformX2[Oncorhynchusmykiss];XP_021413565.1glucosidase2subunitbeta-likeisoformX1[Oncorhynchusmykiss];XP_021413564.1glucosidase2subunitbeta-likeisoformX1[Oncorhynchusmykiss];XP_021480923.1glucosidase2subunitbeta-like[Oncorhynchusmykiss];XP_021480922.1glucosidase2subunitbeta-like[Oncorhynchusmykiss]	XP_021413566.1glucosidase2subunitbeta-likeisoformX2[Oncorhynchusmykiss];XP_021413565.1glucosidase2subunitbeta-likeisoformX1[Oncorhynchusmykiss];XP_021413564.1glucosidase2subunitbeta-likeisoformX1[Oncorhynchusmykiss];XP_021480923.1glucosidase2subunitbeta-like[Oncorhynchusmykiss];XP_021480922.1glucosidase2subunitbeta-like[Oncorhynchusmykiss]	6;6;6;4;4	6;6;6;4;4	6;6;6;4;4	;;;;	5	6	6	6	6	4	4	4	4	4	4	4	4	4	5	6	4	4	4	4
XP_021413577.1	gene13897:106607214	XM_014203941.1	XP_014059416.1	LOC106607214	FALSE	FALSE	vascular cell adhesion protein 1-like	694	5178	1	protein_coding	XP_021413577.1	gi|929096955|ref|XP_014059416.1|	87.88	693	84	0	1	693	1	693	0	1230	XP_021413577.1vascularcelladhesionprotein1-like[Oncorhynchusmykiss];XP_021413590.1hemicentin-1-likeisoformX2[Oncorhynchusmykiss];XP_021413589.1hemicentin-1-likeisoformX1[Oncorhynchusmykiss];XP_021413578.1intercellularadhesionmolecule1-like[Oncorhynchusmykiss];XP_021481613.1hemicentin-1-like[Oncorhynchusmykiss]	XP_021413577.1vascularcelladhesionprotein1-like[Oncorhynchusmykiss];XP_021413590.1hemicentin-1-likeisoformX2[Oncorhynchusmykiss];XP_021413589.1hemicentin-1-likeisoformX1[Oncorhynchusmykiss];XP_021413578.1intercellularadhesionmolecule1-like[Oncorhynchusmykiss];XP_021481613.1hemicentin-1-like[Oncorhynchusmykiss]	2;2;2;1;1	2;2;2;1;1	2;2;2;1;1	;;;;	5	2	2	2	2	2	1	2	1	2	1	1	1	1	1	2	2	1	2	1
XP_021413598.1	gene13912:100196216	NM_001141245.1	NP_001134717.1	mfap4	FALSE	FALSE	microfibrillar-associated protein 4	240	882	1	protein_coding	XP_021413598.1	gi|213511356|ref|NP_001134717.1|	97.08	240	7	0	1	240	1	240	2e-136	483	XP_021413598.1microfibril-associatedglycoprotein4-like[Oncorhynchusmykiss]	XP_021413598.1microfibril-associatedglycoprotein4-like[Oncorhynchusmykiss]	3	3	3		1	3	3	3	2	3	2	2	1	2	2	1	2	2	1	2	3	2	2	1
XP_021413605.1	gene13918:100194731	XM_014203899.1	XP_014059374.1	LOC100194731	FALSE	FALSE	primary amine oxidase, liver isozyme	753	2965	1	protein_coding	XP_021413605.1	gi|929096876|ref|XP_014059374.1|	96.81	753	24	0	6	758	1	753	0	1525	XP_021413605.1membraneprimaryamineoxidase-like[Oncorhynchusmykiss]	XP_021413605.1membraneprimaryamineoxidase-like[Oncorhynchusmykiss]	5	1	1		1	5	1	1	1	0	4	1	5	2	2	0	4	2	4	1	0	1	1	1
XP_021413679.1	gene7613:100195445	NM_001140474.1	NP_001133946.1	f10a1	FALSE	FALSE	Hsc70-interacting protein	395	2125	1	protein_coding	XP_021413679.1	gi|929076591|ref|XP_014048620.1|	98.69	381	5	0	1	381	1	381	0	763	XP_021413679.1hsc70-interactingprotein-likeisoformX3[Oncorhynchusmykiss];XP_021413678.1hsc70-interactingprotein-likeisoformX2[Oncorhynchusmykiss];XP_021480827.1hsc70-interactingprotein-like[Oncorhynchusmykiss];XP_021413677.1hsc70-interactingprotein-likeisoformX1[Oncorhynchusmykiss];XP_021413680.1hsc70-interactingprotein-likeisoformX4[Oncorhynchusmykiss]	XP_021413679.1hsc70-interactingprotein-likeisoformX3[Oncorhynchusmykiss];XP_021413678.1hsc70-interactingprotein-likeisoformX2[Oncorhynchusmykiss];XP_021480827.1hsc70-interactingprotein-like[Oncorhynchusmykiss];XP_021413677.1hsc70-interactingprotein-likeisoformX1[Oncorhynchusmykiss];XP_021413680.1hsc70-interactingprotein-likeisoformX4[Oncorhynchusmykiss]	5;5;5;5;3	5;5;5;5;3	5;5;5;5;3	;;;;	5	5	5	5	5	5	5	5	3	5	4	4	5	5	5	5	5	5	5	3
XP_021413683.1	gene13948:106607164	XM_014203804.1	XP_014059279.1	LOC106607164	FALSE	FALSE	ran GTPase-activating protein 1-like	564	2511	1	protein_coding	XP_021413683.1	gi|929096701|ref|XP_014059279.1|	95.95	543	17	1	1	543	1	538	0	986	XP_021413683.1ranGTPase-activatingprotein1-likeisoformX2[Oncorhynchusmykiss];XP_021413682.1ranGTPase-activatingprotein1-likeisoformX1[Oncorhynchusmykiss];XP_021480824.1ranGTPase-activatingprotein1-likeisoformX2[Oncorhynchusmykiss];XP_021480823.1ranGTPase-activatingprotein1-likeisoformX1[Oncorhynchusmykiss]	XP_021413683.1ranGTPase-activatingprotein1-likeisoformX2[Oncorhynchusmykiss];XP_021413682.1ranGTPase-activatingprotein1-likeisoformX1[Oncorhynchusmykiss];XP_021480824.1ranGTPase-activatingprotein1-likeisoformX2[Oncorhynchusmykiss];XP_021480823.1ranGTPase-activatingprotein1-likeisoformX1[Oncorhynchusmykiss]	6;6;5;5	6;6;5;5	6;6;5;5	;;;	4	6	6	6	4	4	5	4	5	6	6	5	5	5	5	4	4	5	4	5
XP_021413688.1	gene13952:106607160	XM_014203800.1	XP_014059275.1	LOC106607160	FALSE	FALSE	aconitate hydratase, mitochondrial-like	781	5754	1	protein_coding	XP_021413688.1	gi|929096693|ref|XP_014059275.1|	99.49	781	4	0	1	781	1	781	0	1604	XP_021413688.1aconitatehydratase,mitochondrial-like[Oncorhynchusmykiss]	XP_021413688.1aconitatehydratase,mitochondrial-like[Oncorhynchusmykiss]	22	22	1		1	22	22	1	20	21	21	19	20	19	20	19	18	19	17	20	21	21	19	20
XP_021413694.1	gene13958:100195050	NM_001140079.1	NP_001133551.1	plbl1	FALSE	FALSE	phospholipase B-like 1	514	2451	1	protein_coding	XP_021413694.1	gi|213512492|ref|NP_001133551.1|	98.25	514	9	0	22	535	1	514	0	1066	XP_021413694.1phospholipaseB-like1[Oncorhynchusmykiss]	XP_021413694.1phospholipaseB-like1[Oncorhynchusmykiss]	4	4	4		1	4	4	4	4	2	4	4	3	4	4	3	4	3	4	4	2	4	4	3
XP_021413713.1	gene7591:106601225	XM_014193259.1	XP_014048734.1	LOC106601225	FALSE	FALSE	probable ATP-dependent RNA helicase DDX17	631	3086	1	protein_coding	XP_021413713.1	gi|929076814|ref|XP_014048734.1|	96.55	637	16	1	1	637	1	631	0	1122	XP_021413713.1probableATP-dependentRNAhelicaseDDX17[Oncorhynchusmykiss];XP_021423387.1probableATP-dependentRNAhelicaseDDX17[Oncorhynchusmykiss]	XP_021413713.1probableATP-dependentRNAhelicaseDDX17[Oncorhynchusmykiss];XP_021423387.1probableATP-dependentRNAhelicaseDDX17[Oncorhynchusmykiss]	7;5	2;1	2;1	;	2	7	2	2	6	5	6	6	6	7	4	4	6	6	6	1	1	2	2	2
XP_021413774.1	gene7555:106601193	XM_014193192.1	XP_014048667.1	LOC106601193	FALSE	FALSE	UV excision repair protein RAD23 homolog A-like	351	3284	1	protein_coding	XP_021413774.1	gi|929076676|ref|XP_014048667.1|	98.02	353	5	1	1	353	1	351	0	651	XP_021413774.1UVexcisionrepairproteinRAD23homologA-like[Oncorhynchusmykiss]	XP_021413774.1UVexcisionrepairproteinRAD23homologA-like[Oncorhynchusmykiss]	6	1	1		1	6	1	1	5	5	5	6	4	5	6	6	6	5	6	1	1	1	1	0
XP_021413807.1	gene13845:100195120	NM_001140149.1	NP_001133621.1	syfa	FALSE	FALSE	Phenylalanyl-tRNA synthetase alpha chain	497	2001	1	protein_coding	XP_021413807.1	gi|213513920|ref|NP_001133621.1|	99.2	497	4	0	1	497	1	497	0	1028	XP_021413807.1phenylalanine--tRNAligasealphasubunit[Oncorhynchusmykiss]	XP_021413807.1phenylalanine--tRNAligasealphasubunit[Oncorhynchusmykiss]	7	7	3		1	7	7	3	6	5	7	6	5	6	4	5	5	5	6	6	5	7	6	5
XP_021413811.1	gene7700:106601349	XM_014193499.1	XP_014048974.1	LOC106601349	FALSE	FALSE	interleukin enhancer-binding factor 3 homolog	844	3433	1	protein_coding	XP_021413811.1	gi|929077265|ref|XP_014048975.1|	98.83	683	8	0	1	683	1	683	0	1390	XP_021413811.1interleukinenhancer-bindingfactor3isoformX2[Oncorhynchusmykiss];XP_021413810.1interleukinenhancer-bindingfactor3isoformX1[Oncorhynchusmykiss];XP_021413809.1interleukinenhancer-bindingfactor3isoformX1[Oncorhynchusmykiss];XP_021413808.1interleukinenhancer-bindingfactor3isoformX1[Oncorhynchusmykiss];XP_021450811.1interleukinenhancer-bindingfactor3homolog[Oncorhynchusmykiss]	XP_021413811.1interleukinenhancer-bindingfactor3isoformX2[Oncorhynchusmykiss];XP_021413810.1interleukinenhancer-bindingfactor3isoformX1[Oncorhynchusmykiss];XP_021413809.1interleukinenhancer-bindingfactor3isoformX1[Oncorhynchusmykiss];XP_021413808.1interleukinenhancer-bindingfactor3isoformX1[Oncorhynchusmykiss]	7;7;7;7;1	1;1;1;1;0	1;1;1;1;0	;;;	5	7	1	1	6	7	6	7	6	6	7	7	7	6	7	0	1	0	1	0
XP_021413862.1	gene35133:106574055	XM_014149586.1	XP_014005061.1	LOC106574055	FALSE	FALSE	rab GTPase-activating protein 1-like, isoform 10	1036	5855	1	protein_coding	XP_021413862.1	gi|929257384|ref|XP_014005061.1|	98.49	994	14	1	1	994	1	993	0	1984	XP_021413862.1rabGTPase-activatingprotein1-like[Oncorhynchusmykiss];XP_021459082.1rabGTPase-activatingprotein1-like[Oncorhynchusmykiss]	XP_021413862.1rabGTPase-activatingprotein1-like[Oncorhynchusmykiss];XP_021459082.1rabGTPase-activatingprotein1-like[Oncorhynchusmykiss]	3;3	3;3	3;3	;	2	3	3	3	3	1	2	3	2	1	1	1	1	2	1	3	1	2	3	2
XP_021413873.1	gene7727:106601326	XM_014193442.1	XP_014048917.1	LOC106601326	FALSE	FALSE	low-density lipoprotein receptor-like	880	3029	1	protein_coding	XP_021413873.1	gi|929077157|ref|XP_014048917.1|	96.36	880	32	0	1	880	1	880	0	1682	XP_021413873.1low-densitylipoproteinreceptor[Oncorhynchusmykiss]	XP_021413873.1low-densitylipoproteinreceptor[Oncorhynchusmykiss]	10	10	2		1	10	10	2	10	10	10	10	9	8	8	10	6	8	9	10	10	10	10	9
XP_021413886.1	gene13774:106607003	XM_014203534.1	XP_014059009.1	gcat	FALSE	FALSE	glycine C-acetyltransferase	427	1730	1	protein_coding	XP_021413886.1	gi|929096213|ref|XP_014059009.1|	97.89	427	9	0	1	427	1	427	0	837	XP_021413886.12-amino-3-ketobutyratecoenzymeAligase,mitochondrial[Oncorhynchusmykiss]	XP_021413886.12-amino-3-ketobutyratecoenzymeAligase,mitochondrial[Oncorhynchusmykiss]	12	12	12		1	12	12	12	11	8	7	10	7	11	6	7	9	9	9	11	8	7	10	7
XP_021413927.1	gene7776:106601402	XM_014193593.1	XP_014049068.1	LOC106601402	FALSE	FALSE	cytoglobin-2-like	177	1798	1	protein_coding	XP_021413927.1	gi|929077439|ref|XP_014049068.1|	95.48	177	8	0	1	177	1	177	8e-97	351	XP_021413927.1cytoglobin-1-like[Oncorhynchusmykiss]	XP_021413927.1cytoglobin-1-like[Oncorhynchusmykiss]	2	2	2		1	2	2	2	2	2	2	2	2	2	2	2	2	2	2	2	2	2	2	2
XP_021413943.1	gene7789:106601422	XM_014193629.1	XP_014049104.1	LOC106601422	FALSE	FALSE	THO complex subunit 4-like	263	1228	1	protein_coding	XP_021413943.1	gi|929077508|ref|XP_014049105.1|	90.15	203	19	1	21	223	13	214	4e-82	303	XP_021413943.1THOcomplexsubunit4isoformX2[Oncorhynchusmykiss];XP_021413942.1THOcomplexsubunit4isoformX1[Oncorhynchusmykiss];XP_021481079.1THOcomplexsubunit4-like[Oncorhynchusmykiss];XP_021423727.1THOcomplexsubunit4-like[Oncorhynchusmykiss];XP_021412843.1THOcomplexsubunit4-like[Oncorhynchusmykiss]	XP_021413943.1THOcomplexsubunit4isoformX2[Oncorhynchusmykiss];XP_021413942.1THOcomplexsubunit4isoformX1[Oncorhynchusmykiss];XP_021481079.1THOcomplexsubunit4-like[Oncorhynchusmykiss];XP_021423727.1THOcomplexsubunit4-like[Oncorhynchusmykiss];XP_021412843.1THOcomplexsubunit4-like[Oncorhynchusmykiss]	4;3;3;2;2	4;3;3;2;2	4;3;3;2;2	;;;;	5	4	4	4	3	3	3	4	3	3	3	3	4	3	3	3	3	3	4	3
XP_021413949.1	gene13739:106606967	XM_014203483.1	XP_014058958.1	LOC106606967	FALSE	FALSE	rho GDP-dissociation inhibitor 1-like	205	2393	1	protein_coding	XP_021413949.1	gi|929096112|ref|XP_014058955.1|	99.02	204	2	0	1	204	1	204	2e-116	416	XP_021413949.1rhoGDP-dissociationinhibitor1-likeisoformX4[Oncorhynchusmykiss];XP_021413948.1rhoGDP-dissociationinhibitor1-likeisoformX4[Oncorhynchusmykiss];XP_021413947.1rhoGDP-dissociationinhibitor1-likeisoformX3[Oncorhynchusmykiss];XP_021413946.1rhoGDP-dissociationinhibitor1-likeisoformX2[Oncorhynchusmykiss];XP_021413945.1rhoGDP-dissociationinhibitor1-likeisoformX1[Oncorhynchusmykiss]	XP_021413949.1rhoGDP-dissociationinhibitor1-likeisoformX4[Oncorhynchusmykiss];XP_021413948.1rhoGDP-dissociationinhibitor1-likeisoformX4[Oncorhynchusmykiss];XP_021413947.1rhoGDP-dissociationinhibitor1-likeisoformX3[Oncorhynchusmykiss];XP_021413946.1rhoGDP-dissociationinhibitor1-likeisoformX2[Oncorhynchusmykiss];XP_021413945.1rhoGDP-dissociationinhibitor1-likeisoformX1[Oncorhynchusmykiss]	4;4;3;3;2	4;4;3;3;2	1;1;0;1;0	;;;;	5	4	4	1	4	2	3	3	3	2	3	3	4	3	2	4	2	3	3	3
XP_021413988.1	gene12038:106605467	XM_014201163.1	XP_014056638.1	decr1	FALSE	FALSE	2,4-dienoyl CoA reductase 1, mitochondrial	339	1931	1	protein_coding	XP_021413988.1	gi|929091754|ref|XP_014056638.1|	99.3	285	2	0	1	285	55	339	5e-164	575	XP_021413988.12,4-dienoyl-CoAreductase,mitochondrial-likeisoformX2[Oncorhynchusmykiss];XP_021413978.12,4-dienoyl-CoAreductase,mitochondrial-likeisoformX1[Oncorhynchusmykiss]	XP_021413988.12,4-dienoyl-CoAreductase,mitochondrial-likeisoformX2[Oncorhynchusmykiss];XP_021413978.12,4-dienoyl-CoAreductase,mitochondrial-likeisoformX1[Oncorhynchusmykiss]	3;3	3;3	3;3	;	2	3	3	3	3	3	3	3	3	3	3	3	3	3	3	3	3	3	3	3
XP_021414007.1	gene13713:100196891	XM_014203408.1	XP_014058883.1	map2k4	FALSE	FALSE	mitogen-activated protein kinase kinase 4	480	2761	1	protein_coding	XP_021414007.1	gi|213515200|ref|NP_001135384.1|	100	281	0	0	1	281	136	416	1e-168	590	XP_021414007.1dualspecificitymitogen-activatedproteinkinasekinase4isoformX5[Oncorhynchusmykiss];XP_021420339.1dualspecificitymitogen-activatedproteinkinasekinase4-likeisoformX2[Oncorhynchusmykiss];XP_021481145.1dualspecificitymitogen-activatedproteinkinasekinase4-likeisoformX4[Oncorhynchusmykiss];XP_021414006.1dualspecificitymitogen-activatedproteinkinasekinase4isoformX4[Oncorhynchusmykiss];XP_02…	XP_021414007.1dualspecificitymitogen-activatedproteinkinasekinase4isoformX5[Oncorhynchusmykiss];XP_021420339.1dualspecificitymitogen-activatedproteinkinasekinase4-likeisoformX2[Oncorhynchusmykiss];XP_021481145.1dualspecificitymitogen-activatedproteinkinasekinase4-likeisoformX4[Oncorhynchusmykiss];XP_021414006.1dualspecificitymitogen-activatedproteinkinasekinase4isoformX4[Oncorhynchusmykiss];XP_02…	2;2;2;2;2;2;2;2;2;2;2;2;2	2;2;2;2;2;2;2;2;2;2;2;2;2	2;2;2;2;2;2;2;2;2;2;2;2;2	;;;;;;;;;;;;	13	2	2	2	2	2	2	1	1	1	2	2	1	2	2	2	2	2	1	1
XP_021414012.1	gene12036:106605471	XM_014201177.1	XP_014056652.1	LOC106605471	FALSE	FALSE	purine nucleoside phosphorylase-like	298	2198	1	protein_coding	XP_021414012.1	gi|929091780|ref|XP_014056652.1|	99.33	298	2	0	1	298	1	298	1e-175	614	XP_021414012.1purinenucleosidephosphorylase-like[Oncorhynchusmykiss];XP_021453604.1purinenucleosidephosphorylase-like[Oncorhynchusmykiss];XP_021424602.1purinenucleosidephosphorylase-like[Oncorhynchusmykiss];XP_021426198.1purinenucleosidephosphorylase-like[Oncorhynchusmykiss]	XP_021414012.1purinenucleosidephosphorylase-like[Oncorhynchusmykiss]	5;1;1;1	5;1;1;1	5;1;1;1		4	5	5	5	4	5	5	5	5	4	5	5	5	5	5	4	5	5	5	5
XP_021414039.1	gene12033:106605473	XM_014201181.1	XP_014056656.1	LOC106605473	FALSE	FALSE	succinate-semialdehyde dehydrogenase, mitochondrial-like	511	3545	1	protein_coding	XP_021414039.1	gi|929091788|ref|XP_014056656.1|	98.83	511	6	0	58	568	1	511	0	1041	XP_021414039.1succinate-semialdehydedehydrogenase,mitochondrial[Oncorhynchusmykiss];XP_021447749.1succinate-semialdehydedehydrogenase,mitochondrial-like,partial[Oncorhynchusmykiss]	XP_021414039.1succinate-semialdehydedehydrogenase,mitochondrial[Oncorhynchusmykiss];XP_021447749.1succinate-semialdehydedehydrogenase,mitochondrial-like,partial[Oncorhynchusmykiss]	8;4	8;4	8;4	;	2	8	8	8	7	7	7	7	8	7	7	6	7	8	7	7	7	7	7	8
XP_021414058.1	gene7925:106601556	XM_014193858.1	XP_014049333.1	LOC106601556	FALSE	FALSE	granulins-like	899	3563	1	protein_coding	XP_021414058.1	gi|929077929|ref|XP_014049333.1|	90.77	899	37	1	1	853	1	899	0	1581	XP_021414058.1granulins-likeisoformX3[Oncorhynchusmykiss];XP_021414056.1granulins-likeisoformX2[Oncorhynchusmykiss];XP_021414055.1granulins-likeisoformX1[Oncorhynchusmykiss];XP_021414054.1granulins-likeisoformX1[Oncorhynchusmykiss];XP_021414053.1granulins-likeisoformX1[Oncorhynchusmykiss]	XP_021414058.1granulins-likeisoformX3[Oncorhynchusmykiss];XP_021414056.1granulins-likeisoformX2[Oncorhynchusmykiss];XP_021414055.1granulins-likeisoformX1[Oncorhynchusmykiss];XP_021414054.1granulins-likeisoformX1[Oncorhynchusmykiss];XP_021414053.1granulins-likeisoformX1[Oncorhynchusmykiss]	3;3;3;3;3	1;1;1;1;1	1;1;1;1;1	;;;;	5	3	1	1	3	3	3	3	3	3	3	3	3	3	3	1	1	1	1	1
XP_021414105.1	gene13648:106606886	XM_014203339.1	XP_014058814.1	LOC106606886	FALSE	TRUE	coronin-1A-like	456	2043	1	protein_coding	XP_021414105.1	gi|929095860|ref|XP_014058814.1|	99.34	456	3	0	1	456	1	456	0	946	XP_021414105.1coronin-1A-like[Oncorhynchusmykiss]	XP_021414105.1coronin-1A-like[Oncorhynchusmykiss]	5	1	1		1	5	1	1	5	5	5	3	3	5	2	1	3	3	3	1	1	1	0	1
XP_021414115.1	gene13653:106606889	XM_014203344.1	XP_014058819.1	LOC106606889	FALSE	FALSE	cytochrome c oxidase subunit 6A, mitochondrial	102	615	1	protein_coding	XP_021414115.1	gi|929095870|ref|XP_014058819.1|	99.02	102	1	0	1	102	1	102	6e-55	210	XP_021414115.1cytochromecoxidasesubunit6A,mitochondrial[Oncorhynchusmykiss]	XP_021414115.1cytochromecoxidasesubunit6A,mitochondrial[Oncorhynchusmykiss]	3	3	3		1	3	3	3	3	3	3	3	3	3	3	3	2	3	3	3	3	3	3	3
XP_021414121.1	gene13660:106606895	XM_014203351.1	XP_014058826.1	cssa06h16orf58	FALSE	FALSE	chromosome ssa06 open reading frame, human C16orf58	430	3772	1	protein_coding	XP_021414121.1	gi|929095882|ref|XP_014058826.1|	97.91	430	9	0	1	430	1	430	0	815	XP_021414121.1RUS1familyproteinC16orf58homolog[Oncorhynchusmykiss]	XP_021414121.1RUS1familyproteinC16orf58homolog[Oncorhynchusmykiss]	3	3	3		1	3	3	3	3	3	3	2	3	3	3	1	3	1	2	3	3	3	2	3
XP_021414125.1	gene7960:100137048	NM_001123716.1	NP_001117188.1	mlc-2	FALSE	FALSE	myosin regulatory light chain 2	170	823	1	protein_coding	XP_021414125.1	gi|185132088|ref|NP_001117188.1|	77.25	189	2	1	1	189	23	170	1e-76	284	XP_021414125.1myosinregulatorylightchain2,skeletalmuscleisoform-like[Oncorhynchusmykiss]	XP_021414125.1myosinregulatorylightchain2,skeletalmuscleisoform-like[Oncorhynchusmykiss]	2	2	2		1	2	2	2	0	2	2	0	2	0	2	2	0	0	1	0	2	2	0	2
XP_021414215.1	gene7967:106601595	XM_014193918.1	XP_014049393.1	LOC106601595	FALSE	TRUE	dynamin-2-like	861	3444	1	protein_coding	XP_021414215.1	gi|929078058|ref|XP_014049401.1|	94.57	755	41	0	1	755	1	755	0	1456	XP_021414215.1dynamin-2isoformX15[Oncorhynchusmykiss];XP_021414213.1dynamin-2isoformX13[Oncorhynchusmykiss];XP_021414212.1dynamin-2isoformX12[Oncorhynchusmykiss];XP_021414210.1dynamin-2isoformX10[Oncorhynchusmykiss];XP_021414209.1dynamin-2isoformX9[Oncorhynchusmykiss];XP_021414208.1dynamin-2isoformX8[Oncorhynchusmykiss];XP_021414207.1dynamin-2isoformX7[Oncorhynchusmykiss];XP_021481315.1dynamin-2-…	XP_021414215.1dynamin-2isoformX15[Oncorhynchusmykiss];XP_021414213.1dynamin-2isoformX13[Oncorhynchusmykiss];XP_021414212.1dynamin-2isoformX12[Oncorhynchusmykiss];XP_021414210.1dynamin-2isoformX10[Oncorhynchusmykiss];XP_021414209.1dynamin-2isoformX9[Oncorhynchusmykiss];XP_021414208.1dynamin-2isoformX8[Oncorhynchusmykiss];XP_021414207.1dynamin-2isoformX7[Oncorhynchusmykiss];XP_021481315.1dynamin-2-…	11;11;11;11;11;11;11;11;11;11;11;11;11;11;10;10;10;10;3;2;2;1;1;1;1	11;11;11;11;11;11;11;11;11;11;11;11;11;11;10;10;10;10;3;2;2;1;1;1;1	11;11;11;11;11;11;11;11;11;11;11;11;11;11;10;10;10;10;3;2;2;1;1;1;1	;;;;;;;;;;;;;;;;;	25	11	11	11	9	9	9	11	10	10	8	7	6	9	9	9	9	9	11	10
XP_021414245.1	gene13439:106606759	XM_014203121.1	XP_014058596.1	LOC106606759	FALSE	FALSE	pyridoxal-dependent decarboxylase domain-containing protein 1-like	594	3987	1	protein_coding	XP_021414245.1	gi|929095490|ref|XP_014058596.1|	93.22	590	21	2	210	780	5	594	0	1086	XP_021414245.1pyridoxal-dependentdecarboxylasedomain-containingprotein1-likeisoformX6[Oncorhynchusmykiss];XP_021481338.1pyridoxal-dependentdecarboxylasedomain-containingprotein1-likeisoformX5[Oncorhynchusmykiss];XP_021414244.1pyridoxal-dependentdecarboxylasedomain-containingprotein1-likeisoformX5[Oncorhynchusmykiss];XP_021481337.1pyridoxal-dependentdecarboxylasedomain-containingprotein1-likeisofo…	XP_021414245.1pyridoxal-dependentdecarboxylasedomain-containingprotein1-likeisoformX6[Oncorhynchusmykiss];XP_021481338.1pyridoxal-dependentdecarboxylasedomain-containingprotein1-likeisoformX5[Oncorhynchusmykiss];XP_021414244.1pyridoxal-dependentdecarboxylasedomain-containingprotein1-likeisoformX5[Oncorhynchusmykiss];XP_021481337.1pyridoxal-dependentdecarboxylasedomain-containingprotein1-likeisofo…	5;5;5;5;4;4;4;4;4;4;4	5;5;5;5;4;4;4;4;4;4;4	5;5;5;5;4;4;4;4;4;4;4	;;;;;;;;;;	11	5	5	5	5	5	4	5	2	5	4	4	3	4	4	5	5	4	5	2
XP_021414318.1	gene13305:106606653	XM_014202996.1	XP_014058471.1	LOC106606653	FALSE	TRUE	rho GTPase-activating protein 17-like	656	2003	1	protein_coding	XP_021414318.1	gi|929095249|ref|XP_014058471.1|	96.49	656	17	2	36	685	1	656	0	1268	XP_021414318.1rhoGTPase-activatingprotein17-like[Oncorhynchusmykiss];XP_021411961.1rhoGTPase-activatingprotein17-like[Oncorhynchusmykiss];XP_021414319.1rhoGTPase-activatingprotein17-like,partial[Oncorhynchusmykiss]	XP_021414318.1rhoGTPase-activatingprotein17-like[Oncorhynchusmykiss]	3;1;1	3;1;1	3;1;1		3	3	3	3	3	2	3	3	3	3	2	3	3	3	3	3	2	3	3	3
XP_021414344.1	gene13349:106606699	XM_014203054.1	XP_014058529.1	LOC106606699	FALSE	FALSE	hydroxyacylglutathione hydrolase, mitochondrial	313	1915	1	protein_coding	XP_021414344.1	gi|929095367|ref|XP_014058529.1|	98.85	260	3	0	1	260	54	313	2e-152	536	XP_021414344.1hydroxyacylglutathionehydrolase,mitochondrialisoformX2[Oncorhynchusmykiss];XP_021414341.1hydroxyacylglutathionehydrolase,mitochondrialisoformX2[Oncorhynchusmykiss];XP_021414343.1hydroxyacylglutathionehydrolase,mitochondrialisoformX1[Oncorhynchusmykiss];XP_021414340.1hydroxyacylglutathionehydrolase,mitochondrialisoformX1[Oncorhynchusmykiss]	XP_021414344.1hydroxyacylglutathionehydrolase,mitochondrialisoformX2[Oncorhynchusmykiss];XP_021414341.1hydroxyacylglutathionehydrolase,mitochondrialisoformX2[Oncorhynchusmykiss];XP_021414343.1hydroxyacylglutathionehydrolase,mitochondrialisoformX1[Oncorhynchusmykiss];XP_021414340.1hydroxyacylglutathionehydrolase,mitochondrialisoformX1[Oncorhynchusmykiss]	10;10;10;10	10;10;10;10	10;10;10;10	;;;	4	10	10	10	10	8	9	8	8	10	8	7	9	7	9	10	8	9	8	8
XP_021414379.1	gene64734:100194589	XM_014185032.1	XP_014040507.1	rpl3l	FALSE	FALSE	ribosomal protein L3-like	409	1587	1	protein_coding	XP_021414379.1	gi|213515418|ref|NP_001133147.1|	99.02	409	4	0	1	409	1	409	0	840	XP_021414379.160SribosomalproteinL3-like[Oncorhynchusmykiss];XP_021414377.160SribosomalproteinL3-like[Oncorhynchusmykiss]	XP_021414379.160SribosomalproteinL3-like[Oncorhynchusmykiss];XP_021414377.160SribosomalproteinL3-like[Oncorhynchusmykiss]	4;4	2;2	2;2	;	2	4	2	2	4	4	4	4	4	4	4	4	4	4	4	2	2	2	2	2
XP_021414409.1	gene8177:106601814	XM_014194210.1	XP_014049685.1	LOC106601814	FALSE	FALSE	NADH dehydrogenase [ubiquinone] 1 beta subcomplex subunit 10-like	196	689	1	protein_coding	XP_021414409.1	gi|929078636|ref|XP_014049685.1|	99.41	170	1	0	1	170	27	196	5e-99	358	XP_021414409.1NADHdehydrogenase[ubiquinone]1betasubcomplexsubunit10-like[Oncorhynchusmykiss]	XP_021414409.1NADHdehydrogenase[ubiquinone]1betasubcomplexsubunit10-like[Oncorhynchusmykiss]	4	4	4		1	4	4	4	4	4	4	4	4	4	4	3	4	4	4	4	4	4	4	4
XP_021414534.1	gene52279:106594728	XM_014186121.1	XP_014041596.1	LOC106594728	FALSE	TRUE	cytochrome P450 2K1	504	1945	1	protein_coding	XP_021414534.1	gi|929318898|ref|XP_014041596.1|	90.67	504	47	0	1	504	1	504	0	887	XP_021414534.1cytochromeP4502K1isoformX1[Oncorhynchusmykiss];XP_021414535.1cytochromeP4502K1isoformX2[Oncorhynchusmykiss];XP_021414538.1cytochromeP4502K1isoformX5[Oncorhynchusmykiss];XP_021414539.1cytochromeP4502K1isoformX6[Oncorhynchusmykiss];XP_021414542.1cytochromeP4502K3-like[Oncorhynchusmykiss];XP_021449755.1cytochromeP4502K3-like,partial[Oncorhynchusmykiss];XP_021451908.1cytochromeP4502K1-l…	XP_021414534.1cytochromeP4502K1isoformX1[Oncorhynchusmykiss];XP_021414535.1cytochromeP4502K1isoformX2[Oncorhynchusmykiss];XP_021414538.1cytochromeP4502K1isoformX5[Oncorhynchusmykiss];XP_021414539.1cytochromeP4502K1isoformX6[Oncorhynchusmykiss];XP_021414542.1cytochromeP4502K3-like[Oncorhynchusmykiss]	24;23;21;19;12;10;2	24;23;21;19;12;10;2	6;6;4;6;3;2;0	;;;;	7	24	24	6	20	23	20	22	21	23	22	23	20	19	22	20	23	20	22	21
XP_021414540.1	gene52279:106594728	XM_014186121.1	XP_014041596.1	LOC106594728	FALSE	TRUE	cytochrome P450 2K1	504	1945	1	protein_coding	XP_021414540.1	gi|929318898|ref|XP_014041596.1|	88.69	504	57	0	1	504	1	504	0	868	XP_021414540.1cytochromeP4502K4-like[Oncorhynchusmykiss];XP_021447900.1cytochromeP4502K4-like,partial[Oncorhynchusmykiss];XP_021414541.1cytochromeP4502K1-like[Oncorhynchusmykiss];XP_021449263.1cytochromeP4502K4-like,partial[Oncorhynchusmykiss];XP_021469380.1cytochromeP4502J2-likeisoformX3[Oncorhynchusmykiss];XP_021469379.1cytochromeP4502J2-likeisoformX2[Oncorhynchusmykiss];XP_021469378.1cytochrom…	XP_021414540.1cytochromeP4502K4-like[Oncorhynchusmykiss]	16;7;4;3;1;1;1	5;3;1;2;1;1;1	3;2;0;1;0;0;0		7	16	5	3	11	15	13	12	10	14	12	12	9	9	12	4	4	4	4	3
XP_021414548.1	gene11992:100194593	XM_014200677.1	XP_014056152.1	nt5c3	FALSE	FALSE	5'-nucleotidase, cytosolic III	331	2564	1	protein_coding	XP_021414548.1	gi|929090804|ref|XP_014056152.1|	99.3	285	2	0	1	285	47	331	7e-168	588	XP_021414548.1cytosolic5'-nucleotidase3isoformX2[Oncorhynchusmykiss];XP_021414543.1cytosolic5'-nucleotidase3isoformX1[Oncorhynchusmykiss];XP_021438261.1cytosolic5'-nucleotidase3A-like[Oncorhynchusmykiss]	XP_021414548.1cytosolic5'-nucleotidase3isoformX2[Oncorhynchusmykiss];XP_021414543.1cytosolic5'-nucleotidase3isoformX1[Oncorhynchusmykiss]	6;6;1	6;6;1	5;5;1	;	3	6	6	5	6	6	6	6	5	5	5	4	5	6	6	6	6	6	6	5
XP_021414600.1	gene8272:106601908	XM_014194340.1	XP_014049815.1	LOC106601908	FALSE	FALSE	GTPase HRas-like	187	1050	1	protein_coding	XP_021414600.1	gi|929078869|ref|XP_014049814.1|	100	187	0	0	1	187	1	187	4e-107	385	XP_021414600.1GTPaseHRas-like[Oncorhynchusmykiss];XP_021411822.1G-proteinisoformX1[Oncorhynchusmykiss];XP_021411821.1G-proteinisoformX1[Oncorhynchusmykiss];XP_021456777.1GTPaseKRasisoformX2[Oncorhynchusmykiss];XP_021429589.1GTPaseKRasisoformX4[Oncorhynchusmykiss];XP_021429580.1GTPaseKRasisoformX3[Oncorhynchusmykiss];XP_021456769.1GTPaseKRasisoformX1[Oncorhynchusmykiss];XP_021456032.1GTPaseHRas-li…	XP_021414600.1GTPaseHRas-like[Oncorhynchusmykiss];XP_021411822.1G-proteinisoformX1[Oncorhynchusmykiss];XP_021411821.1G-proteinisoformX1[Oncorhynchusmykiss];XP_021456777.1GTPaseKRasisoformX2[Oncorhynchusmykiss];XP_021429589.1GTPaseKRasisoformX4[Oncorhynchusmykiss];XP_021429580.1GTPaseKRasisoformX3[Oncorhynchusmykiss];XP_021456769.1GTPaseKRasisoformX1[Oncorhynchusmykiss];XP_021456032.1GTPaseHRas-li…	2;2;2;2;2;2;2;2;2;2;2;2;2;2	2;2;2;2;2;2;2;2;2;2;2;2;2;2	2;2;2;2;2;2;2;2;2;2;2;2;2;2	;;;;;;;;;;;;;	14	2	2	2	1	1	1	1	2	1	2	2	2	2	2	1	1	1	1	2
XP_021414637.1	gene13085:106606436	XM_014202636.1	XP_014058111.1	LOC106606436	FALSE	FALSE	pyrroline-5-carboxylate reductase 1, mitochondrial-like	320	2086	1	protein_coding	XP_021414637.1	gi|929094575|ref|XP_014058111.1|	99.06	320	3	0	1	320	1	320	0	645	XP_021414637.1pyrroline-5-carboxylatereductase1,mitochondrial-like[Oncorhynchusmykiss];XP_021414635.1pyrroline-5-carboxylatereductase1,mitochondrial-like[Oncorhynchusmykiss]	XP_021414637.1pyrroline-5-carboxylatereductase1,mitochondrial-like[Oncorhynchusmykiss];XP_021414635.1pyrroline-5-carboxylatereductase1,mitochondrial-like[Oncorhynchusmykiss]	8;8	4;4	4;4	;	2	8	4	4	7	7	8	8	7	7	7	6	7	8	8	3	3	4	4	3
XP_021414654.1	gene13053:106606402	XM_014202569.1	XP_014058044.1	LOC106606402	FALSE	TRUE	soluble calcium-activated nucleotidase 1-like	405	2277	1	protein_coding	XP_021414654.1	gi|929094459|ref|XP_014058044.1|	98.28	408	4	1	1	408	1	405	0	822	XP_021414654.1solublecalcium-activatednucleotidase1-likeisoformX2[Oncorhynchusmykiss];XP_021414653.1solublecalcium-activatednucleotidase1-likeisoformX2[Oncorhynchusmykiss];XP_021414652.1solublecalcium-activatednucleotidase1-likeisoformX2[Oncorhynchusmykiss];XP_021414651.1solublecalcium-activatednucleotidase1-likeisoformX2[Oncorhynchusmykiss];XP_021414650.1solublecalcium-activatednucleotidase1-lik…	XP_021414654.1solublecalcium-activatednucleotidase1-likeisoformX2[Oncorhynchusmykiss];XP_021414653.1solublecalcium-activatednucleotidase1-likeisoformX2[Oncorhynchusmykiss];XP_021414652.1solublecalcium-activatednucleotidase1-likeisoformX2[Oncorhynchusmykiss];XP_021414651.1solublecalcium-activatednucleotidase1-likeisoformX2[Oncorhynchusmykiss];XP_021414650.1solublecalcium-activatednucleotidase1-lik…	12;12;12;12;12;10;10;10;10;10	12;12;12;12;12;10;10;10;10;10	12;12;12;12;12;10;10;10;10;10	;;;;;;;;;	10	12	12	12	12	11	12	12	11	12	12	12	12	11	12	12	11	12	12	11
XP_021414705.1	gene12935:106606286	XM_014202427.1	XP_014057902.1	LOC106606286	FALSE	TRUE	brain-specific angiogenesis inhibitor 1-associated protein 2-like	577	2790	1	protein_coding	XP_021414705.1	gi|929094190|ref|XP_014057904.1|	100	186	0	0	1	186	1	186	4e-107	385	XP_021414705.1brain-specificangiogenesisinhibitor1-associatedprotein2-like,partial[Oncorhynchusmykiss]	XP_021414705.1brain-specificangiogenesisinhibitor1-associatedprotein2-like,partial[Oncorhynchusmykiss]	2	2	2		1	2	2	2	2	2	2	2	2	2	2	2	2	2	2	2	2	2	2	2
XP_021414710.1	gene12853:106606197	XM_014202327.1	XP_014057802.1	LOC106606197	FALSE	FALSE	actin-related protein 2/3 complex subunit 1A-like	372	1392	1	protein_coding	XP_021414710.1	gi|929093993|ref|XP_014057802.1|	99.7	336	1	0	1	336	1	336	0	696	XP_021414710.1actin-relatedprotein2/3complexsubunit1A-like[Oncorhynchusmykiss]	XP_021414710.1actin-relatedprotein2/3complexsubunit1A-like[Oncorhynchusmykiss]	13	13	13		1	13	13	13	12	11	11	12	11	13	10	11	10	11	12	12	11	11	12	11
XP_021414871.1	gene4968:106589870	XM_014180281.1	XP_014035756.1	LOC106589870	FALSE	FALSE	paralemmin-3-like	514	4299	1	protein_coding	XP_021414871.1	gi|929068865|ref|XP_014035767.1|	91.33	496	37	2	1	496	1	490	0	837	XP_021414871.1paralemmin-1-like[Oncorhynchusmykiss];XP_021412443.1paralemmin-3-like[Oncorhynchusmykiss];XP_021412441.1paralemmin-3-like[Oncorhynchusmykiss]	XP_021414871.1paralemmin-1-like[Oncorhynchusmykiss];XP_021412443.1paralemmin-3-like[Oncorhynchusmykiss];XP_021412441.1paralemmin-3-like[Oncorhynchusmykiss]	2;1;1	2;1;1	2;1;1	;;	3	2	2	2	2	0	1	1	0	2	0	0	0	0	0	2	0	1	1	0
XP_021414884.1	gene25444:106564596	XM_014130743.1	XP_013986218.1	LOC106564596	FALSE	FALSE	nodal modulator 1-like	1990	7756	1	protein_coding	XP_021414884.1	gi|929220064|ref|XP_013986218.1|	97.19	1991	55	1	1	1991	1	1990	0	3902	XP_021414884.1nodalmodulator1-like[Oncorhynchusmykiss];XP_021423467.1nodalmodulator1-like[Oncorhynchusmykiss]	XP_021414884.1nodalmodulator1-like[Oncorhynchusmykiss];XP_021423467.1nodalmodulator1-like[Oncorhynchusmykiss]	22;19	22;19	22;19	;	2	22	22	22	20	19	18	20	19	18	22	20	20	20	19	20	19	18	20	19
XP_021414937.1	gene25015:106564156	XM_014130174.1	XP_013985649.1	LOC106564156	FALSE	FALSE	peptidyl-prolyl cis-trans isomerase NIMA-interacting 1-like	160	1092	1	protein_coding	XP_021414937.1	gi|929218978|ref|XP_013985649.1|	99.38	160	1	0	1	160	1	160	9e-91	330	XP_021414937.1peptidyl-prolylcis-transisomeraseNIMA-interacting1[Oncorhynchusmykiss]	XP_021414937.1peptidyl-prolylcis-transisomeraseNIMA-interacting1[Oncorhynchusmykiss]	2	2	2		1	2	2	2	2	2	1	1	1	1	2	0	1	1	1	2	2	1	1	1
XP_021415040.1	gene8242:106601877	XM_014194304.1	XP_014049779.1	LOC106601877	FALSE	TRUE	elongation factor Tu, mitochondrial-like	459	1690	1	protein_coding	XP_021415040.1	gi|929078809|ref|XP_014049779.1|	99.35	459	3	0	1	459	1	459	0	947	XP_021415040.1elongationfactorTu,mitochondrial-like[Oncorhynchusmykiss];XP_021415039.1elongationfactorTu,mitochondrial-like[Oncorhynchusmykiss]	XP_021415040.1elongationfactorTu,mitochondrial-like[Oncorhynchusmykiss];XP_021415039.1elongationfactorTu,mitochondrial-like[Oncorhynchusmykiss]	8;8	8;8	8;8	;	2	8	8	8	8	8	8	8	8	8	8	8	8	8	8	8	8	8	8	8
XP_021415060.1	gene13065:106606414	XM_014202588.1	XP_014058063.1	LOC106606414	FALSE	FALSE	putative L-aspartate dehydrogenase	278	1105	1	protein_coding	XP_021415060.1	gi|929094491|ref|XP_014058063.1|	99.12	226	2	0	1	226	1	226	2e-130	463	XP_021415060.1putativeL-aspartatedehydrogenase,partial[Oncorhynchusmykiss];XP_021448245.1putativeL-aspartatedehydrogenaseisoformX3[Oncorhynchusmykiss];XP_021448244.1putativeL-aspartatedehydrogenaseisoformX2[Oncorhynchusmykiss]	XP_021415060.1putativeL-aspartatedehydrogenase,partial[Oncorhynchusmykiss];XP_021448245.1putativeL-aspartatedehydrogenaseisoformX3[Oncorhynchusmykiss];XP_021448244.1putativeL-aspartatedehydrogenaseisoformX2[Oncorhynchusmykiss]	7;5;5	7;5;5	2;0;0	;;	3	7	7	2	6	7	6	7	7	7	7	7	7	6	7	6	7	6	7	7
XP_021415071.1	gene13066:106606415	XM_014202589.1	XP_014058064.1	gys1	FALSE	FALSE	glycogen synthase 1 (muscle)	712	3946	1	protein_coding	XP_021415071.1	gi|929094493|ref|XP_014058064.1|	99.44	712	4	0	1	712	1	712	0	1484	XP_021415071.1glycogen[starch]synthase,muscle-like[Oncorhynchusmykiss];XP_021415032.1glycogen[starch]synthase,muscle-like[Oncorhynchusmykiss];XP_021448293.1glycogen[starch]synthase,muscle-like,partial[Oncorhynchusmykiss];XP_021452400.1glycogen[starch]synthase,muscle-like[Oncorhynchusmykiss]	XP_021415071.1glycogen[starch]synthase,muscle-like[Oncorhynchusmykiss];XP_021415032.1glycogen[starch]synthase,muscle-like[Oncorhynchusmykiss]	14;14;3;1	11;11;3;1	11;11;3;1	;	4	14	11	11	14	13	14	14	13	12	13	14	13	11	12	11	11	11	11	10
XP_021415080.1	gene11948:106605311	XM_014200791.1	XP_014056266.1	LOC106605311	FALSE	FALSE	lamin-A-like	670	4694	1	protein_coding	XP_021415080.1	gi|929091017|ref|XP_014056265.1|	98.51	670	10	0	4	673	1	670	0	1348	XP_021415080.1lamin-A-like[Oncorhynchusmykiss];XP_021415075.1lamin-A-like[Oncorhynchusmykiss];XP_021450020.1lamin-A-like,partial[Oncorhynchusmykiss];XP_021451835.1lamin-A-like[Oncorhynchusmykiss]	XP_021415080.1lamin-A-like[Oncorhynchusmykiss];XP_021415075.1lamin-A-like[Oncorhynchusmykiss]	16;16;2;1	16;16;2;1	2;2;0;0	;	4	16	16	2	15	13	14	15	14	14	12	13	13	12	16	15	13	14	15	14
XP_021415097.1	gene12927:100194602	NM_001139687.1	NP_001133159.1	atp5h	FALSE	FALSE	ATP synthase, H+ transporting, mitochondrial F0 complex, subunit d	161	723	1	protein_coding	XP_021415097.1	gi|213512880|ref|NP_001133159.1|	99.38	161	1	0	1	161	1	161	2e-90	330	XP_021415097.1ATPsynthasesubunitd,mitochondrial-like[Oncorhynchusmykiss];XP_021415096.1ATPsynthasesubunitd,mitochondrial-like[Oncorhynchusmykiss];XP_021415095.1ATPsynthasesubunitd,mitochondrial-like[Oncorhynchusmykiss];XP_021481530.1ATPsynthasesubunitd,mitochondrial-like[Oncorhynchusmykiss]	XP_021415097.1ATPsynthasesubunitd,mitochondrial-like[Oncorhynchusmykiss];XP_021415096.1ATPsynthasesubunitd,mitochondrial-like[Oncorhynchusmykiss];XP_021415095.1ATPsynthasesubunitd,mitochondrial-like[Oncorhynchusmykiss];XP_021481530.1ATPsynthasesubunitd,mitochondrial-like[Oncorhynchusmykiss]	6;6;6;4	6;6;6;4	6;6;6;4	;;;	4	6	6	6	6	6	6	6	6	6	5	6	5	6	6	6	6	6	6	6
XP_021415194.1	gene31152:106569987	XM_014141799.1	XP_013997274.1	LOC106569987	FALSE	FALSE	chromodomain-helicase-DNA-binding protein 4-like	1996	6544	1	protein_coding	XP_021415194.1	gi|929242564|ref|XP_013997285.1|	92.47	1965	59	10	1	1878	1	1963	0	3375	XP_021415194.1chromodomain-helicase-DNA-bindingprotein4-like[Oncorhynchusmykiss];XP_021427634.1chromodomain-helicase-DNA-bindingprotein4-like[Oncorhynchusmykiss];XP_021445970.1chromodomain-helicase-DNA-bindingprotein4-like[Oncorhynchusmykiss];XP_021479117.1chromodomain-helicase-DNA-bindingprotein4-like[Oncorhynchusmykiss];XP_021425149.1chromodomain-helicase-DNA-bindingprotein5-likeisoformX6[Oncor…	XP_021415194.1chromodomain-helicase-DNA-bindingprotein4-like[Oncorhynchusmykiss];XP_021427634.1chromodomain-helicase-DNA-bindingprotein4-like[Oncorhynchusmykiss];XP_021445970.1chromodomain-helicase-DNA-bindingprotein4-like[Oncorhynchusmykiss];XP_021479117.1chromodomain-helicase-DNA-bindingprotein4-like[Oncorhynchusmykiss];XP_021425149.1chromodomain-helicase-DNA-bindingprotein5-likeisoformX6[Oncor…	3;2;2;2;2;2;2;2;2;2;2;1;1;1;1;1;1;1;1;1;1	3;2;2;2;2;2;2;2;2;2;2;1;1;1;1;1;1;1;1;1;1	3;2;2;2;2;2;2;2;2;2;2;1;1;1;1;1;1;1;1;1;1	;;;;;;;;;;	21	3	3	3	0	1	1	0	1	1	2	1	2	1	1	0	1	1	0	1
XP_021415198.1	gene49783:106588461	XM_014177495.1	XP_014032970.1	LOC106588461	FALSE	FALSE	microtubule-actin cross-linking factor 1-like	8202	29355	1	protein_coding	XP_021415198.1	gi|929310587|ref|XP_014032985.1|	92.31	4369	269	12	4073	8398	3815	8159	0	7772	XP_021415198.1microtubule-actincross-linkingfactor1-like[Oncorhynchusmykiss];XP_021432138.1dystonin-likeisoformX5[Oncorhynchusmykiss];XP_021432137.1dystonin-likeisoformX4[Oncorhynchusmykiss];XP_021432135.1dystonin-likeisoformX2[Oncorhynchusmykiss];XP_021432134.1dystonin-likeisoformX1[Oncorhynchusmykiss];XP_021432139.1dystonin-likeisoformX6[Oncorhynchusmykiss];XP_021432136.1dystonin-likeisoformX3[…	XP_021415198.1microtubule-actincross-linkingfactor1-like[Oncorhynchusmykiss]	5;2;2;2;2;1;1;1;1;1;1	4;1;1;1;1;1;1;1;1;1;1	0;0;0;0;0;0;0;0;0;0;0		11	5	4	0	4	4	4	3	5	4	4	4	3	4	3	3	3	3	2	4
XP_021415272.1	gene11927:100196667	NM_001141696.1	NP_001135168.1	rbm8a	FALSE	FALSE	RNA binding motif protein 8A	175	1029	1	protein_coding	XP_021415272.1	gi|929090810|ref|XP_014056156.1|	100	173	0	0	1	173	1	173	8e-97	351	XP_021415272.1RNA-bindingprotein8AisoformX2[Oncorhynchusmykiss];XP_021415265.1RNA-bindingprotein8AisoformX1[Oncorhynchusmykiss];XP_021437474.1RNA-bindingprotein8AisoformX2[Oncorhynchusmykiss];XP_021437470.1RNA-bindingprotein8AisoformX1[Oncorhynchusmykiss]	XP_021415272.1RNA-bindingprotein8AisoformX2[Oncorhynchusmykiss];XP_021415265.1RNA-bindingprotein8AisoformX1[Oncorhynchusmykiss];XP_021437474.1RNA-bindingprotein8AisoformX2[Oncorhynchusmykiss];XP_021437470.1RNA-bindingprotein8AisoformX1[Oncorhynchusmykiss]	2;2;2;2	2;2;2;2	2;2;2;2	;;;	4	2	2	2	2	2	2	2	2	2	2	2	1	2	2	2	2	2	2	2
XP_021415345.1	gene34813:106573658	XM_014148907.1	XP_014004382.1	LOC106573658	FALSE	FALSE	anamorsin-A	359	2197	1	protein_coding	XP_021415345.1	gi|929256081|ref|XP_014004382.1|	97.44	312	8	0	1	312	47	358	3e-157	553	XP_021415345.1anamorsinisoformX3[Oncorhynchusmykiss];XP_021414752.1anamorsinisoformX2[Oncorhynchusmykiss];XP_021414023.1anamorsinisoformX1[Oncorhynchusmykiss]	XP_021415345.1anamorsinisoformX3[Oncorhynchusmykiss];XP_021414752.1anamorsinisoformX2[Oncorhynchusmykiss];XP_021414023.1anamorsinisoformX1[Oncorhynchusmykiss]	2;2;2	1;1;1	1;1;1	;;	3	2	1	1	2	1	2	2	2	2	1	2	2	2	2	1	1	1	1	1
XP_021415405.1	gene11917:106605280	XM_014200743.1	XP_014056218.1	LOC106605280	FALSE	FALSE	deoxyribonuclease-2-alpha-like	391	1871	1	protein_coding	XP_021415405.1	gi|929090925|ref|XP_014056218.1|	96.68	391	12	1	1	390	1	391	0	780	XP_021415405.1deoxyribonuclease-2-alpha-like[Oncorhynchusmykiss];XP_021449917.1deoxyribonuclease-2-alpha-like[Oncorhynchusmykiss]	XP_021415405.1deoxyribonuclease-2-alpha-like[Oncorhynchusmykiss];XP_021449917.1deoxyribonuclease-2-alpha-like[Oncorhynchusmykiss]	2;2	2;2	2;2	;	2	2	2	2	2	2	2	1	1	1	2	1	2	2	1	2	2	2	1	1
XP_021415406.1	gene31925:106570786	XM_014143283.1	XP_013998758.1	LOC106570786	FALSE	TRUE	serine/threonine-protein kinase 3-like	422	3368	1	protein_coding	XP_021415406.1	gi|929245368|ref|XP_013998758.1|	96.19	420	8	2	78	496	10	422	0	747	XP_021415406.1serine/threonine-proteinkinase3-like[Oncorhynchusmykiss];XP_021428483.1serine/threonine-proteinkinase3-like[Oncorhynchusmykiss]	XP_021415406.1serine/threonine-proteinkinase3-like[Oncorhynchusmykiss];XP_021428483.1serine/threonine-proteinkinase3-like[Oncorhynchusmykiss]	2;1	2;1	2;1	;	2	2	2	2	1	2	1	2	1	1	2	2	1	1	2	1	2	1	2	1
XP_021415431.1	gene31852:106570718	XM_014143199.1	XP_013998674.1	LOC106570718	FALSE	FALSE	tissue alpha-L-fucosidase-like	456	2428	1	protein_coding	XP_021415431.1	gi|929245199|ref|XP_013998674.1|	96.93	456	14	0	1	456	1	456	0	919	XP_021415431.1tissuealpha-L-fucosidase-like[Oncorhynchusmykiss]	XP_021415431.1tissuealpha-L-fucosidase-like[Oncorhynchusmykiss]	2	2	2		1	2	2	2	2	2	2	2	2	2	1	2	2	2	2	2	2	2	2	2
XP_021415459.1	gene11913:100136585	NM_001123673.1	NP_001117145.1	tap1	FALSE	FALSE	transporter 1, ATP-binding cassette, sub-family B (MDR/TAP)	739	2891	1	protein_coding	XP_021415459.1	gi|185132640|ref|NP_001117145.1|	98.34	725	12	0	1	725	1	725	0	1481	XP_021415459.1antigenpeptidetransporter1-like[Oncorhynchusmykiss]	XP_021415459.1antigenpeptidetransporter1-like[Oncorhynchusmykiss]	2	2	2		1	2	2	2	0	2	0	0	1	1	0	0	1	2	0	0	2	0	0	1
XP_021415469.1	gene31797:106570663	XM_014143134.1	XP_013998609.1	LOC106570663	FALSE	FALSE	syntaxin-12-like	268	2587	1	protein_coding	XP_021415469.1	gi|929245056|ref|XP_013998609.1|	97.39	268	7	0	1	268	1	268	5e-143	505	XP_021415469.1syntaxin-12-like[Oncorhynchusmykiss]	XP_021415469.1syntaxin-12-like[Oncorhynchusmykiss]	2	2	2		1	2	2	2	1	2	1	1	2	2	2	2	2	2	2	1	2	1	1	2
XP_021415488.1	gene31736:106570598	XM_014143055.1	XP_013998530.1	LOC106570598	FALSE	FALSE	fatty acid-binding protein, heart-like	133	704	1	protein_coding	XP_021415488.1	gi|929244908|ref|XP_013998530.1|	95.49	133	6	0	1	133	1	133	4e-70	261	XP_021415488.1fattyacid-bindingprotein,heart-like[Oncorhynchusmykiss]	XP_021415488.1fattyacid-bindingprotein,heart-like[Oncorhynchusmykiss]	9	9	8		1	9	9	8	9	9	9	9	9	9	9	9	9	9	9	9	9	9	9	9
XP_021415489.1	gene50335:106588745	XM_014178071.1	XP_014033546.1	pdcd6ip	FALSE	FALSE	programmed cell death 6 interacting protein	887	3021	1	protein_coding	XP_021415489.1	gi|929311631|ref|XP_014033547.1|	96.48	398	14	0	1	398	1	398	0	796	XP_021415489.1programmedcelldeath6-interactingprotein-like[Oncorhynchusmykiss];XP_021415491.1programmedcelldeath6-interactingprotein-like[Oncorhynchusmykiss]	XP_021415489.1programmedcelldeath6-interactingprotein-like[Oncorhynchusmykiss]	7;1	2;1	2;1		2	7	2	2	5	7	6	7	7	7	7	5	6	3	4	1	2	2	2	2
XP_021415497.1	gene31748:106570608	XM_014143070.1	XP_013998545.1	LOC106570608	FALSE	FALSE	small nuclear ribonucleoprotein Sm D1	119	630	1	protein_coding	XP_021415497.1	gi|929244936|ref|XP_013998545.1|	98.29	117	2	0	1	117	3	119	3e-60	228	XP_021415497.1smallnuclearribonucleoproteinSmD1isoformX2[Oncorhynchusmykiss];XP_021428132.1smallnuclearribonucleoproteinSmD1[Oncorhynchusmykiss];XP_021415496.1smallnuclearribonucleoproteinSmD1isoformX1[Oncorhynchusmykiss]	XP_021415497.1smallnuclearribonucleoproteinSmD1isoformX2[Oncorhynchusmykiss];XP_021428132.1smallnuclearribonucleoproteinSmD1[Oncorhynchusmykiss];XP_021415496.1smallnuclearribonucleoproteinSmD1isoformX1[Oncorhynchusmykiss]	3;3;3	3;3;3	3;3;3	;;	3	3	3	3	2	2	2	3	2	3	2	3	3	2	2	2	2	2	3	2
XP_021415520.1	gene50391:100196202	XM_014178200.1	XP_014033675.1	tpd52	FALSE	FALSE	tumor protein D52	254	2997	1	protein_coding	XP_021415520.1	gi|929311870|ref|XP_014033676.1|	86.83	243	32	0	1	243	1	243	4e-112	402	XP_021415520.1tumorproteinD52-like[Oncorhynchusmykiss]	XP_021415520.1tumorproteinD52-like[Oncorhynchusmykiss]	2	2	1		1	2	2	1	2	2	2	2	2	2	2	1	2	2	2	2	2	2	2	2
XP_021415532.1	gene31691:100195078	NM_001140107.1	NP_001133579.1	tp4a2	FALSE	TRUE	tyrosine phosphatase type IVA 2	168	2321	1	protein_coding	XP_021415532.1	gi|213511110|ref|NP_001133579.1|	98.81	168	2	0	1	168	1	168	4e-96	348	XP_021415532.1proteintyrosinephosphatasetypeIVA2[Oncorhynchusmykiss];XP_021453987.1proteintyrosinephosphatasetypeIVA3-likeisoformX5[Oncorhynchusmykiss];XP_021453986.1probableproteintyrosinephosphatasetypeIVABisoformX4[Oncorhynchusmykiss];XP_021453985.1proteintyrosinephosphatasetypeIVA3-likeisoformX3[Oncorhynchusmykiss];XP_021442664.1proteintyrosinephosphatasetypeIVA3-like[Oncorhynchusmykiss];XP_0…	XP_021415532.1proteintyrosinephosphatasetypeIVA2[Oncorhynchusmykiss];XP_021453987.1proteintyrosinephosphatasetypeIVA3-likeisoformX5[Oncorhynchusmykiss];XP_021453986.1probableproteintyrosinephosphatasetypeIVABisoformX4[Oncorhynchusmykiss];XP_021453985.1proteintyrosinephosphatasetypeIVA3-likeisoformX3[Oncorhynchusmykiss];XP_021442664.1proteintyrosinephosphatasetypeIVA3-like[Oncorhynchusmykiss];XP_0…	2;1;1;1;1;1;1;1;1;1;1	2;1;1;1;1;1;1;1;1;1;1	2;1;1;1;1;1;1;1;1;1;1	;;;;;;;;;;	11	2	2	2	2	2	2	2	2	2	1	2	2	2	2	2	2	2	2	2
XP_021415558.1	gene52843:106591096	XM_014182288.1	XP_014037763.1	ergic1	FALSE	TRUE	endoplasmic reticulum-golgi intermediate compartment 1	298	2124	1	protein_coding	XP_021415558.1	gi|929319212|ref|XP_014037763.1|	77.78	297	26	3	3	290	33	298	2e-127	454	XP_021415558.1endoplasmicreticulum-Golgiintermediatecompartmentprotein1[Oncorhynchusmykiss]	XP_021415558.1endoplasmicreticulum-Golgiintermediatecompartmentprotein1[Oncorhynchusmykiss]	4	4	2		1	4	4	2	3	4	3	3	2	4	4	4	4	3	2	3	4	3	3	2
XP_021415580.1	gene31671:106570531	XM_014142960.1	XP_013998435.1	LOC106570531	FALSE	FALSE	transformer-2 protein homolog alpha-like	312	1674	1	protein_coding	XP_021415580.1	gi|929244723|ref|XP_013998435.1|	98.08	312	6	0	1	312	1	312	5e-167	585	XP_021415580.1transformer-2proteinhomologalpha-like[Oncorhynchusmykiss];XP_021428237.1transformer-2proteinhomologalpha-like[Oncorhynchusmykiss]	XP_021415580.1transformer-2proteinhomologalpha-like[Oncorhynchusmykiss];XP_021428237.1transformer-2proteinhomologalpha-like[Oncorhynchusmykiss]	2;2	1;1	1;1	;	2	2	1	1	1	1	1	1	1	1	1	2	1	1	1	1	1	1	1	1
XP_021415582.1	gene31672:106570533	XM_014142965.1	XP_013998440.1	LOC106570533	FALSE	FALSE	insulin-like growth factor 2 mRNA-binding protein 3	623	2878	1	protein_coding	XP_021415582.1	gi|929244733|ref|XP_013998441.1|	97.85	606	7	1	1	606	1	600	0	1214	XP_021415582.1insulin-likegrowthfactor2mRNA-bindingprotein3isoformX2[Oncorhynchusmykiss];XP_021428238.1insulin-likegrowthfactor2mRNA-bindingprotein3[Oncorhynchusmykiss];XP_021415581.1insulin-likegrowthfactor2mRNA-bindingprotein3isoformX1[Oncorhynchusmykiss]	XP_021415582.1insulin-likegrowthfactor2mRNA-bindingprotein3isoformX2[Oncorhynchusmykiss];XP_021428238.1insulin-likegrowthfactor2mRNA-bindingprotein3[Oncorhynchusmykiss];XP_021415581.1insulin-likegrowthfactor2mRNA-bindingprotein3isoformX1[Oncorhynchusmykiss]	2;2;2	2;2;2	2;2;2	;;	3	2	2	2	1	2	2	2	2	1	1	2	2	2	2	1	2	2	2	2
XP_021415603.1	gene50470:106588897	XM_014178422.1	XP_014033897.1	LOC106588897	FALSE	FALSE	nuclear transcription factor Y subunit gamma-like	412	3124	1	protein_coding	XP_021415603.1	gi|929312295|ref|XP_014033902.1|	94.08	338	9	2	1	338	62	388	1e-166	584	XP_021415603.1nucleartranscriptionfactorYsubunitgamma[Oncorhynchusmykiss];XP_021428268.1nucleartranscriptionfactorYsubunitgamma-likeisoformX5[Oncorhynchusmykiss];XP_021428267.1nucleartranscriptionfactorYsubunitgamma-likeisoformX4[Oncorhynchusmykiss];XP_021428266.1nucleartranscriptionfactorYsubunitgamma-likeisoformX3[Oncorhynchusmykiss];XP_021428265.1nucleartranscriptionfactorYsubunitgamma-likeiso…	XP_021415603.1nucleartranscriptionfactorYsubunitgamma[Oncorhynchusmykiss];XP_021428268.1nucleartranscriptionfactorYsubunitgamma-likeisoformX5[Oncorhynchusmykiss];XP_021428267.1nucleartranscriptionfactorYsubunitgamma-likeisoformX4[Oncorhynchusmykiss];XP_021428266.1nucleartranscriptionfactorYsubunitgamma-likeisoformX3[Oncorhynchusmykiss];XP_021428265.1nucleartranscriptionfactorYsubunitgamma-likeiso…	2;2;2;2;2;2	2;2;2;2;2;2	2;2;2;2;2;2	;;;;;	6	2	2	2	1	2	1	2	1	1	2	1	2	2	1	1	2	1	2	1
XP_021415623.1	gene31612:106570481	XM_014142876.1	XP_013998351.1	LOC106570481	FALSE	FALSE	cytochrome b-c1 complex subunit 7-like	110	535	1	protein_coding	XP_021415623.1	gi|929244566|ref|XP_013998351.1|	100	110	0	0	1	110	1	110	1e-59	226	XP_021415623.1cytochromeb-c1complexsubunit7-like[Oncorhynchusmykiss]	XP_021415623.1cytochromeb-c1complexsubunit7-like[Oncorhynchusmykiss]	2	2	1		1	2	2	1	2	2	2	2	2	1	2	2	2	2	2	2	2	2	2	2
XP_021415643.1	gene31598:106570467	XM_014142846.1	XP_013998321.1	LOC106570467	FALSE	FALSE	pyruvate dehydrogenase (acetyl-transferring) kinase isozyme 2, mitochondrial-like	409	5048	1	protein_coding	XP_021415643.1	gi|929244503|ref|XP_013998321.1|	90.71	409	8	1	1	379	1	409	0	758	XP_021415643.1pyruvatedehydrogenase(acetyl-transferring)kinaseisozyme4,mitochondrial-likeisoformX2[Oncorhynchusmykiss];XP_021415642.1pyruvatedehydrogenase(acetyl-transferring)kinaseisozyme2,mitochondrial-likeisoformX1[Oncorhynchusmykiss];XP_021428309.1pyruvatedehydrogenase(acetyl-transferring)kinaseisozyme2,mitochondrial-like[Oncorhynchusmykiss]	XP_021415643.1pyruvatedehydrogenase(acetyl-transferring)kinaseisozyme4,mitochondrial-likeisoformX2[Oncorhynchusmykiss];XP_021415642.1pyruvatedehydrogenase(acetyl-transferring)kinaseisozyme2,mitochondrial-likeisoformX1[Oncorhynchusmykiss];XP_021428309.1pyruvatedehydrogenase(acetyl-transferring)kinaseisozyme2,mitochondrial-like[Oncorhynchusmykiss]	2;2;2	2;2;2	2;2;2	;;	3	2	2	2	1	2	1	2	1	2	1	2	2	2	1	1	2	1	2	1
XP_021415676.1	gene31558:106570415	XM_014142716.1	XP_013998191.1	LOC106570415	FALSE	FALSE	protein NDRG1-like	381	2431	1	protein_coding	XP_021415676.1	gi|929244257|ref|XP_013998192.1|	99.46	369	2	0	1	369	1	369	0	771	XP_021415676.1proteinNDRG1-likeisoformX2[Oncorhynchusmykiss];XP_021415675.1proteinNDRG1-likeisoformX1[Oncorhynchusmykiss]	XP_021415676.1proteinNDRG1-likeisoformX2[Oncorhynchusmykiss];XP_021415675.1proteinNDRG1-likeisoformX1[Oncorhynchusmykiss]	7;7	7;7	3;3	;	2	7	7	3	5	6	6	6	6	6	7	5	6	7	6	5	6	6	6	6
XP_021415686.1	gene31554:100196311	XM_014142713.1	XP_013998188.1	csk21	FALSE	FALSE	Casein kinase II subunit alpha	392	1973	1	protein_coding	XP_021415686.1	gi|929244249|ref|XP_013998187.1|	100	392	0	0	1	392	1	392	0	819	XP_021415686.1caseinkinaseIIsubunitalphaisoformX1[Oncorhynchusmykiss];XP_021415685.1caseinkinaseIIsubunitalphaisoformX1[Oncorhynchusmykiss];XP_021415687.1caseinkinaseIIsubunitalphaisoformX2[Oncorhynchusmykiss];XP_021424189.1caseinkinaseIIsubunitalpha-likeisoformX1[Oncorhynchusmykiss];XP_021466311.1caseinkinaseIIsubunitalpha-like[Oncorhynchusmykiss];XP_021466310.1caseinkinaseIIsubunitalpha-like[On…	XP_021415686.1caseinkinaseIIsubunitalphaisoformX1[Oncorhynchusmykiss];XP_021415685.1caseinkinaseIIsubunitalphaisoformX1[Oncorhynchusmykiss];XP_021415687.1caseinkinaseIIsubunitalphaisoformX2[Oncorhynchusmykiss]	8;8;4;3;3;3;3;3;3;3	1;1;0;0;0;0;0;0;0;0	1;1;0;0;0;0;0;0;0;0	;;	10	8	1	1	7	7	7	6	7	6	6	6	5	6	6	1	1	1	1	1
XP_021415714.1	gene31531:106570403	XM_014142696.1	XP_013998171.1	LOC106570403	FALSE	FALSE	60S acidic ribosomal protein P1-like	111	548	1	protein_coding	XP_021415714.1	gi|929244217|ref|XP_013998171.1|	100	111	0	0	1	111	1	111	2e-57	218	XP_021415714.160SacidicribosomalproteinP1-like[Oncorhynchusmykiss]	XP_021415714.160SacidicribosomalproteinP1-like[Oncorhynchusmykiss]	5	5	2		1	5	5	2	5	4	5	4	4	5	4	5	4	4	4	5	4	5	4	4
XP_021415728.1	gene31514:106570395	XM_014142657.1	XP_013998132.1	LOC106570395	FALSE	FALSE	fatty acid-binding protein, liver-like	126	871	1	protein_coding	XP_021415728.1	gi|929244146|ref|XP_013998132.1|	99.21	126	1	0	1	126	1	126	9e-69	256	XP_021415728.1fattyacid-bindingprotein,liver-like[Oncorhynchusmykiss]	XP_021415728.1fattyacid-bindingprotein,liver-like[Oncorhynchusmykiss]	6	6	6		1	6	6	6	6	6	6	6	6	5	6	6	6	6	6	6	6	6	6	6
XP_021415755.1	gene11897:106605262	XM_014200706.1	XP_014056181.1	LOC106605262	FALSE	FALSE	septin-7	426	2321	1	protein_coding	XP_021415755.1	gi|929090859|ref|XP_014056182.1|	99.76	419	1	0	1	419	1	419	0	870	XP_021415755.1septin-7isoformX2[Oncorhynchusmykiss];XP_021415744.1septin-7isoformX1[Oncorhynchusmykiss]	XP_021415755.1septin-7isoformX2[Oncorhynchusmykiss];XP_021415744.1septin-7isoformX1[Oncorhynchusmykiss]	7;7	7;7	1;1	;	2	7	7	1	6	6	6	7	6	7	5	6	6	6	6	6	6	6	7	6
XP_021415759.1	gene31500:106570366	XM_014142595.1	XP_013998070.1	LOC106570366	FALSE	FALSE	glutathione S-transferase A-like	229	1243	1	protein_coding	XP_021415759.1	gi|929244030|ref|XP_013998070.1|	97.82	229	5	0	1	229	1	229	3e-133	473	XP_021415759.1glutathioneS-transferaseA-like[Oncorhynchusmykiss]	XP_021415759.1glutathioneS-transferaseA-like[Oncorhynchusmykiss]	5	5	5		1	5	5	5	5	4	5	4	5	5	4	4	4	4	5	5	4	5	4	5
XP_021415820.1	gene31461:106570323	XM_014142517.1	XP_013997992.1	LOC106570323	FALSE	FALSE	ATP-binding cassette sub-family F member 1-like	860	3491	1	protein_coding	XP_021415820.1	gi|929243883|ref|XP_013997992.1|	95.72	864	33	2	1	864	1	860	0	1355	XP_021415820.1ATP-bindingcassettesub-familyFmember1-like[Oncorhynchusmykiss]	XP_021415820.1ATP-bindingcassettesub-familyFmember1-like[Oncorhynchusmykiss]	11	11	1		1	11	11	1	10	9	10	9	8	10	9	8	9	9	9	10	9	10	9	8
XP_021415856.1	gene31432:106570297	XM_014142462.1	XP_013997937.1	LOC106570297	FALSE	FALSE	asparagine synthetase [glutamine-hydrolyzing]-like	562	2472	1	protein_coding	XP_021415856.1	gi|929243779|ref|XP_013997937.1|	98.58	562	8	0	1	562	1	562	0	1157	XP_021415856.1asparaginesynthetase[glutamine-hydrolyzing][Oncorhynchusmykiss];XP_021428012.1asparaginesynthetase[glutamine-hydrolyzing]-like[Oncorhynchusmykiss]	XP_021415856.1asparaginesynthetase[glutamine-hydrolyzing][Oncorhynchusmykiss]	13;6	13;6	13;6		2	13	13	13	11	9	10	12	12	12	10	8	10	10	11	11	9	10	12	12
XP_021415861.1	gene31426:106570300	XM_014142467.1	XP_013997942.1	LOC106570300	FALSE	FALSE	septin-7	442	2625	1	protein_coding	XP_021415861.1	gi|929243791|ref|XP_013997943.1|	99.08	435	4	0	1	435	1	435	0	894	XP_021415861.1septin-7isoformX2[Oncorhynchusmykiss];XP_021428002.1septin-7-like[Oncorhynchusmykiss];XP_021415860.1septin-7isoformX1[Oncorhynchusmykiss]	XP_021415861.1septin-7isoformX2[Oncorhynchusmykiss];XP_021428002.1septin-7-like[Oncorhynchusmykiss];XP_021415860.1septin-7isoformX1[Oncorhynchusmykiss]	5;5;5	3;3;3	3;3;3	;;	3	5	3	3	5	5	4	5	5	5	5	5	5	5	5	3	3	2	3	3
XP_021415926.1	gene31414:106570281	XM_014142430.1	XP_013997905.1	LOC106570281	FALSE	FALSE	splicing factor 3A subunit 3-like	501	2346	1	protein_coding	XP_021415926.1	gi|929243719|ref|XP_013997905.1|	100	501	0	0	1	501	1	501	0	1039	XP_021415926.1splicingfactor3Asubunit3-like[Oncorhynchusmykiss];XP_021427983.1splicingfactor3Asubunit3[Oncorhynchusmykiss]	XP_021415926.1splicingfactor3Asubunit3-like[Oncorhynchusmykiss];XP_021427983.1splicingfactor3Asubunit3[Oncorhynchusmykiss]	5;4	5;4	5;4	;	2	5	5	5	5	4	4	4	3	3	4	5	3	4	4	5	4	4	4	3
XP_021415943.1	gene31393:106570260	XM_014142376.1	XP_013997851.1	LOC106570260	FALSE	FALSE	stathmin-like	151	1556	1	protein_coding	XP_021415943.1	gi|929243619|ref|XP_013997851.1|	98.65	148	2	0	1	148	1	148	1e-76	283	XP_021415943.1stathmin-like[Oncorhynchusmykiss];XP_021427958.1stathmin-like[Oncorhynchusmykiss]	XP_021415943.1stathmin-like[Oncorhynchusmykiss];XP_021427958.1stathmin-like[Oncorhynchusmykiss]	3;2	3;2	3;2	;	2	3	3	3	3	3	3	2	3	3	3	3	3	3	3	3	3	3	2	3
XP_021415963.1	gene31377:100286674	NM_001146614.2	NP_001140086.2	nudc	FALSE	FALSE	nuclear distribution gene C homolog	343	1711	1	protein_coding	XP_021415963.1	gi|300934779|ref|NP_001140086.2|	97.08	343	10	0	1	343	1	343	5e-170	595	XP_021415963.1nuclearmigrationproteinnudC-like[Oncorhynchusmykiss];XP_021427942.1nuclearmigrationproteinnudC-like[Oncorhynchusmykiss]	XP_021415963.1nuclearmigrationproteinnudC-like[Oncorhynchusmykiss];XP_021427942.1nuclearmigrationproteinnudC-like[Oncorhynchusmykiss]	2;1	2;1	2;1	;	2	2	2	2	2	1	2	1	1	0	2	2	2	2	2	2	1	2	1	1
XP_021416027.1	gene31333:106570192	XM_014142248.1	XP_013997723.1	LOC106570192	FALSE	FALSE	tropomyosin alpha-3 chain	284	1012	1	protein_coding	XP_021416027.1	gi|929243378|ref|XP_013997728.1|	100	248	0	0	1	248	1	248	1e-131	467	XP_021416027.1tropomyosinalpha-3chainisoformX9[Oncorhynchusmykiss];XP_021416026.1tropomyosinalpha-3chainisoformX8[Oncorhynchusmykiss];XP_021416025.1tropomyosinalpha-4chainisoformX7[Oncorhynchusmykiss];XP_021416024.1tropomyosinalpha-3chainisoformX6[Oncorhynchusmykiss]	XP_021416027.1tropomyosinalpha-3chainisoformX9[Oncorhynchusmykiss];XP_021416026.1tropomyosinalpha-3chainisoformX8[Oncorhynchusmykiss];XP_021416025.1tropomyosinalpha-4chainisoformX7[Oncorhynchusmykiss];XP_021416024.1tropomyosinalpha-3chainisoformX6[Oncorhynchusmykiss]	11;10;10;9	7;6;6;5	1;1;1;1	;;;	4	11	7	1	8	8	9	11	10	7	10	9	11	9	9	4	4	6	7	6
XP_021416050.1	gene31319:106570204	XM_014142285.1	XP_013997760.1	LOC106570204	FALSE	FALSE	hepatoma-derived growth factor-like	226	4311	1	protein_coding	XP_021416050.1	gi|929243436|ref|XP_013997760.1|	95.58	226	4	1	1	220	1	226	4e-119	426	XP_021416050.1hepatoma-derivedgrowthfactor-like[Oncorhynchusmykiss]	XP_021416050.1hepatoma-derivedgrowthfactor-like[Oncorhynchusmykiss]	4	4	2		1	4	4	2	4	4	3	4	4	3	4	4	4	3	4	4	4	3	4	4
XP_021416112.1	gene11867:106605214	XM_014200614.1	XP_014056089.1	LOC106605214	FALSE	FALSE	large proline-rich protein BAG6-like	1253	4262	1	protein_coding	XP_021416112.1	gi|929090687|ref|XP_014056090.1|	97.22	1223	21	2	1	1210	26	1248	0	2080	XP_021416112.1largeproline-richproteinBAG6-likeisoformX3[Oncorhynchusmykiss];XP_021416104.1largeproline-richproteinBAG6-likeisoformX2[Oncorhynchusmykiss];XP_021438363.1largeproline-richproteinBAG6-like[Oncorhynchusmykiss];XP_021416096.1largeproline-richproteinBAG6-likeisoformX1[Oncorhynchusmykiss]	XP_021416112.1largeproline-richproteinBAG6-likeisoformX3[Oncorhynchusmykiss];XP_021416104.1largeproline-richproteinBAG6-likeisoformX2[Oncorhynchusmykiss];XP_021438363.1largeproline-richproteinBAG6-like[Oncorhynchusmykiss];XP_021416096.1largeproline-richproteinBAG6-likeisoformX1[Oncorhynchusmykiss]	3;3;3;3	3;3;3;3	3;3;3;3	;;;	4	3	3	3	3	3	3	3	3	3	3	3	3	3	3	3	3	3	3	3
XP_021416122.1	gene31254:106569895	XM_014141610.1	XP_013997085.1	LOC106569895	FALSE	FALSE	T-complex protein 1 subunit gamma-like	540	2425	1	protein_coding	XP_021416122.1	gi|929242182|ref|XP_013997085.1|	98.7	540	7	0	23	562	1	540	0	1098	XP_021416122.1T-complexprotein1subunitgamma-like[Oncorhynchusmykiss]	XP_021416122.1T-complexprotein1subunitgamma-like[Oncorhynchusmykiss]	7	1	0		1	7	1	0	7	7	7	6	7	7	7	6	7	7	7	1	1	1	0	1
XP_021416127.1	gene31262:106569884	XM_014141597.1	XP_013997072.1	LOC106569884	FALSE	FALSE	interleukin enhancer-binding factor 2 homolog	387	1699	1	protein_coding	XP_021416127.1	gi|929242155|ref|XP_013997072.1|	100	387	0	0	1	387	1	387	0	797	XP_021416127.1interleukinenhancer-bindingfactor2homolog[Oncorhynchusmykiss];XP_021416126.1interleukinenhancer-bindingfactor2homolog[Oncorhynchusmykiss];XP_021427793.1interleukinenhancer-bindingfactor2homolog[Oncorhynchusmykiss]	XP_021416127.1interleukinenhancer-bindingfactor2homolog[Oncorhynchusmykiss];XP_021416126.1interleukinenhancer-bindingfactor2homolog[Oncorhynchusmykiss];XP_021427793.1interleukinenhancer-bindingfactor2homolog[Oncorhynchusmykiss]	10;10;9	10;10;9	10;10;9	;;	3	10	10	10	9	9	10	10	10	10	10	9	10	9	9	9	9	10	10	10
XP_021416129.1	gene35098:100136529	NM_001123632.1	NP_001117104.1	antithrombin	FALSE	FALSE	antithrombin protein	452	1547	1	protein_coding	XP_021416129.1	gi|185136278|ref|NP_001117104.1|	99.34	452	3	0	1	452	1	452	0	929	XP_021416129.1antithrombin-III-like[Oncorhynchusmykiss]	XP_021416129.1antithrombin-III-like[Oncorhynchusmykiss]	9	5	5		1	9	5	5	9	8	8	8	8	9	8	9	8	8	9	5	5	5	5	5
XP_021416130.1	gene31247:106569900	XM_014141617.1	XP_013997092.1	LOC106569900	FALSE	FALSE	acidic leucine-rich nuclear phosphoprotein 32 family member E-like	251	2725	1	protein_coding	XP_021416130.1	gi|929242196|ref|XP_013997092.1|	96.19	236	6	1	1	236	1	233	2e-100	363	XP_021416130.1acidicleucine-richnuclearphosphoprotein32familymemberE-like[Oncorhynchusmykiss]	XP_021416130.1acidicleucine-richnuclearphosphoprotein32familymemberE-like[Oncorhynchusmykiss]	8	8	5		1	8	8	5	7	6	7	7	8	7	7	5	7	7	8	7	6	7	7	8
XP_021416243.1	gene31181:100136367	NM_001123535.1	NP_001117007.1	psmb8b	FALSE	FALSE	proteasome subunit beta type 7b	267	1519	1	protein_coding	XP_021416243.1	gi|185133011|ref|NP_001117007.1|	98.5	267	4	0	1	267	1	267	5e-155	545	XP_021416243.1proteasomesubunitbetatype-8-like[Oncorhynchusmykiss];XP_021427676.1proteasomesubunitbetatype-8-like[Oncorhynchusmykiss]	XP_021416243.1proteasomesubunitbetatype-8-like[Oncorhynchusmykiss];XP_021427676.1proteasomesubunitbetatype-8-like[Oncorhynchusmykiss]	2;1	2;1	2;1	;	2	2	2	2	1	2	2	1	2	2	0	0	0	1	1	1	2	2	1	2
XP_021416281.1	gene31155:106569985	XM_014141796.1	XP_013997271.1	LOC106569985	FALSE	FALSE	triosephosphate isomerase A	248	1401	1	protein_coding	XP_021416281.1	gi|929242538|ref|XP_013997271.1|	98.79	248	3	0	1	248	1	248	2e-142	503	XP_021416281.1triosephosphateisomeraseA[Oncorhynchusmykiss]	XP_021416281.1triosephosphateisomeraseA[Oncorhynchusmykiss]	9	8	3		1	9	8	3	9	8	8	7	9	9	9	8	9	9	8	8	7	7	6	8
XP_021416286.1	gene31082:100380580	NM_001173865.1	NP_001167336.1	ppce	FALSE	FALSE	Prolyl endopeptidase	709	2697	1	protein_coding	XP_021416286.1	gi|291190098|ref|NP_001167336.1|	98.45	709	11	0	1	709	1	709	0	1462	XP_021416286.1prolylendopeptidase-like[Oncorhynchusmykiss]	XP_021416286.1prolylendopeptidase-like[Oncorhynchusmykiss]	16	16	16		1	16	16	16	16	16	15	15	15	15	15	15	16	16	15	16	16	15	15	15
XP_021416293.1	gene31041:106570068	XM_014142021.1	XP_013997496.1	LOC106570068	FALSE	FALSE	carnitine O-acetyltransferase-like	613	3350	1	protein_coding	XP_021416293.1	gi|929242954|ref|XP_013997496.1|	98.86	615	5	1	1	615	1	613	0	1272	XP_021416293.1carnitineO-acetyltransferase-likeisoformX2[Oncorhynchusmykiss];XP_021416292.1carnitineO-acetyltransferase-likeisoformX1[Oncorhynchusmykiss];XP_021415238.1carnitineO-acetyltransferase-like[Oncorhynchusmykiss];XP_021416294.1carnitineO-acetyltransferase-likeisoformX3[Oncorhynchusmykiss]	XP_021416293.1carnitineO-acetyltransferase-likeisoformX2[Oncorhynchusmykiss];XP_021416292.1carnitineO-acetyltransferase-likeisoformX1[Oncorhynchusmykiss];XP_021415238.1carnitineO-acetyltransferase-like[Oncorhynchusmykiss];XP_021416294.1carnitineO-acetyltransferase-likeisoformX3[Oncorhynchusmykiss]	4;4;4;3	4;4;4;3	4;4;4;3	;;;	4	4	4	4	3	3	3	3	4	3	2	3	2	3	3	3	3	3	3	4
XP_021416445.1	gene35094:100195443	XM_014149426.1	XP_014004901.1	slc30a7	FALSE	FALSE	solute carrier family 30 (zinc transporter), member 7	395	2335	1	protein_coding	XP_021416445.1	gi|929257084|ref|XP_014004901.1|	92.93	396	27	1	1	396	1	395	0	642	XP_021416445.1zinctransporter7[Oncorhynchusmykiss]	XP_021416445.1zinctransporter7[Oncorhynchusmykiss]	2	1	1		1	2	1	1	1	2	1	2	1	2	2	2	2	2	2	0	1	0	1	0
XP_021416460.1	gene11607:100136420	XM_014200130.1	XP_014055605.1	LOC100136420	FALSE	FALSE	lysozyme g	200	858	1	protein_coding	XP_021416460.1	gi|929089793|ref|XP_014055607.1|	94.44	180	10	0	1	180	1	180	2e-97	353	XP_021416460.1lysozymeg-likeisoformX3[Oncorhynchusmykiss];XP_021416459.1lysozymeg-likeisoformX2[Oncorhynchusmykiss];XP_021416458.1lysozymeg-likeisoformX1[Oncorhynchusmykiss]	XP_021416460.1lysozymeg-likeisoformX3[Oncorhynchusmykiss];XP_021416459.1lysozymeg-likeisoformX2[Oncorhynchusmykiss];XP_021416458.1lysozymeg-likeisoformX1[Oncorhynchusmykiss]	2;2;2	2;2;2	2;2;2	;;	3	2	2	2	2	2	1	1	1	2	1	1	1	1	1	2	2	1	1	1
XP_021416481.1	gene11596:106604950	XM_014200110.1	XP_014055585.1	LOC106604950	FALSE	FALSE	stress-70 protein, mitochondrial	683	3186	1	protein_coding	XP_021416481.1	gi|929089754|ref|XP_014055585.1|	98.25	684	11	1	1	684	1	683	0	1362	XP_021416481.1stress-70protein,mitochondrial[Oncorhynchusmykiss];XP_021439262.1stress-70protein,mitochondrial-like[Oncorhynchusmykiss]	XP_021416481.1stress-70protein,mitochondrial[Oncorhynchusmykiss];XP_021439262.1stress-70protein,mitochondrial-like[Oncorhynchusmykiss]	18;15	18;15	18;15	;	2	18	18	18	18	14	14	16	17	18	15	16	15	14	16	18	14	14	16	17
XP_021416501.1	gene11591:106604944	XM_014200094.1	XP_014055569.1	LOC106604944	FALSE	FALSE	casein kinase I isoform alpha	378	3770	1	protein_coding	XP_021416501.1	gi|929089737|ref|XP_014055578.1|	100	325	0	0	1	325	1	325	0	682	XP_021416501.1caseinkinaseIisoformX13[Oncorhynchusmykiss];XP_021416500.1caseinkinaseIisoformX12[Oncorhynchusmykiss];XP_021416499.1caseinkinaseIisoformX11[Oncorhynchusmykiss];XP_021416498.1caseinkinaseIisoformX10[Oncorhynchusmykiss];XP_021416497.1caseinkinaseIisoformX9[Oncorhynchusmykiss];XP_021416496.1caseinkinaseIisoformX8[Oncorhynchusmykiss];XP_021416495.1caseinkinaseIisoformX7[Oncorhynchusmyki…	XP_021416501.1caseinkinaseIisoformX13[Oncorhynchusmykiss];XP_021416500.1caseinkinaseIisoformX12[Oncorhynchusmykiss];XP_021416499.1caseinkinaseIisoformX11[Oncorhynchusmykiss];XP_021416498.1caseinkinaseIisoformX10[Oncorhynchusmykiss];XP_021416497.1caseinkinaseIisoformX9[Oncorhynchusmykiss];XP_021416496.1caseinkinaseIisoformX8[Oncorhynchusmykiss];XP_021416495.1caseinkinaseIisoformX7[Oncorhynchusmyki…	3;3;3;3;2;2;2;2;2;2;2;2;2;2	3;3;3;3;2;2;2;2;2;2;2;2;2;2	3;3;3;3;2;2;2;2;2;2;2;2;2;2	;;;;;;;;;;;;;	14	3	3	3	3	3	3	3	2	3	2	2	2	3	3	3	3	3	3	2
XP_021416510.1	gene11587:106604941	XM_014200088.1	XP_014055563.1	LOC106604941	FALSE	FALSE	heterogeneous nuclear ribonucleoprotein A0-like	309	1743	1	protein_coding	XP_021416510.1	gi|929089711|ref|XP_014055563.1|	99.68	309	1	0	1	309	1	309	1e-172	604	XP_021416510.1heterogeneousnuclearribonucleoproteinA0-like[Oncorhynchusmykiss];XP_021416509.1heterogeneousnuclearribonucleoproteinA0-like[Oncorhynchusmykiss]	XP_021416510.1heterogeneousnuclearribonucleoproteinA0-like[Oncorhynchusmykiss];XP_021416509.1heterogeneousnuclearribonucleoproteinA0-like[Oncorhynchusmykiss]	6;6	1;1	1;1	;	2	6	1	1	6	5	5	6	6	6	6	5	4	5	5	1	1	1	1	1
XP_021416543.1	gene11559:100194681	XM_014200054.1	XP_014055529.1	LOC100194681	FALSE	FALSE	heterogeneous nuclear ribonucleoprotein A/B	344	3300	1	protein_coding	XP_021416543.1	gi|929089644|ref|XP_014055529.1|	97.18	284	4	1	1	284	1	280	2e-143	508	XP_021416543.1heterogeneousnuclearribonucleoproteinA/B-likeisoformX3[Oncorhynchusmykiss];XP_021416542.1heterogeneousnuclearribonucleoproteinA/B-likeisoformX2[Oncorhynchusmykiss];XP_021416541.1heterogeneousnuclearribonucleoproteinA/B-likeisoformX1[Oncorhynchusmykiss];XP_021416540.1heterogeneousnuclearribonucleoproteinA/B-likeisoformX1[Oncorhynchusmykiss];XP_021439297.1heterogeneousnuclearribonucle…	XP_021416543.1heterogeneousnuclearribonucleoproteinA/B-likeisoformX3[Oncorhynchusmykiss];XP_021416542.1heterogeneousnuclearribonucleoproteinA/B-likeisoformX2[Oncorhynchusmykiss];XP_021416541.1heterogeneousnuclearribonucleoproteinA/B-likeisoformX1[Oncorhynchusmykiss];XP_021416540.1heterogeneousnuclearribonucleoproteinA/B-likeisoformX1[Oncorhynchusmykiss];XP_021439297.1heterogeneousnuclearribonucle…	5;5;5;5;4;4	2;2;2;2;1;1	1;1;1;1;0;0	;;;;;	6	5	2	1	5	4	5	5	5	5	5	4	3	5	5	2	2	2	2	2
XP_021416603.1	gene11509:106604855	XM_014199918.1	XP_014055393.1	LOC106604855	FALSE	FALSE	fructose-bisphosphate aldolase B-like	362	1251	1	protein_coding	XP_021416603.1	gi|929089385|ref|XP_014055392.1|	98.34	362	6	0	1	362	1	362	0	743	XP_021416603.1fructose-bisphosphatealdolaseB-like[Oncorhynchusmykiss]	XP_021416603.1fructose-bisphosphatealdolaseB-like[Oncorhynchusmykiss]	14	5	5		1	14	5	5	11	10	11	11	11	12	9	11	10	10	14	2	1	2	2	2
XP_021416622.1	gene11506:100136498	NM_001123609.1	NP_001117081.1	LOC100136498	FALSE	FALSE	macrophage migration inhibitory factor	114	629	1	protein_coding	XP_021416622.1	gi|185135710|ref|NP_001117081.1|	100	114	0	0	1	114	1	114	3e-63	238	XP_021416622.1macrophagemigrationinhibitoryfactor-like[Oncorhynchusmykiss];XP_021416621.1macrophagemigrationinhibitoryfactor-like[Oncorhynchusmykiss]	XP_021416622.1macrophagemigrationinhibitoryfactor-like[Oncorhynchusmykiss];XP_021416621.1macrophagemigrationinhibitoryfactor-like[Oncorhynchusmykiss]	3;3	3;3	3;3	;	2	3	3	3	2	1	1	2	1	2	1	1	1	1	1	2	1	1	2	1
XP_021416657.1	gene4233:106582677	XM_014165976.1	XP_014021451.1	LOC106582677	FALSE	FALSE	electron transfer flavoprotein subunit beta-like	253	1661	1	protein_coding	XP_021416657.1	gi|929066136|ref|XP_014021451.1|	98.81	253	3	0	1	253	1	253	5e-143	505	XP_021416657.1electrontransferflavoproteinsubunitbeta-likeisoformX1[Oncorhynchusmykiss];XP_021416664.1electrontransferflavoproteinsubunitbeta-likeisoformX2[Oncorhynchusmykiss]	XP_021416657.1electrontransferflavoproteinsubunitbeta-likeisoformX1[Oncorhynchusmykiss];XP_021416664.1electrontransferflavoproteinsubunitbeta-likeisoformX2[Oncorhynchusmykiss]	8;7	8;7	2;2	;	2	8	8	2	7	6	7	7	5	6	4	6	4	7	7	7	6	7	7	5
XP_021416727.1	gene11423:106604765	XM_014199776.1	XP_014055251.1	LOC106604765	FALSE	FALSE	tubulin beta-4B chain-like	445	1624	1	protein_coding	XP_021416727.1	gi|929089125|ref|XP_014055251.1|	100	445	0	0	1	445	1	445	0	935	XP_021416727.1tubulinbeta-4Bchain-like[Oncorhynchusmykiss];XP_021457431.1tubulinbeta-4Bchain[Oncorhynchusmykiss]	XP_021416727.1tubulinbeta-4Bchain-like[Oncorhynchusmykiss];XP_021457431.1tubulinbeta-4Bchain[Oncorhynchusmykiss]	21;19	1;0	1;0	;	2	21	1	1	20	20	20	21	19	21	19	21	19	21	21	0	0	0	1	0
XP_021416767.1	gene11397:100306772	XM_014199418.1	XP_014054893.1	hnrpg	FALSE	FALSE	Heterogeneous nuclear ribonucleoprotein G	387	1582	1	protein_coding	XP_021416767.1	gi|929088472|ref|XP_014054897.1|	84.17	379	16	4	1	338	1	376	2e-149	527	XP_021416767.1RNA-bindingmotifprotein,Xchromosome-likeisoformX5[Oncorhynchusmykiss];XP_021416766.1RNA-bindingmotifprotein,Xchromosome-likeisoformX4[Oncorhynchusmykiss];XP_021416764.1RNA-bindingmotifprotein,Xchromosome-likeisoformX3[Oncorhynchusmykiss];XP_021416763.1RNA-bindingmotifprotein,Xchromosome-likeisoformX2[Oncorhynchusmykiss];XP_021416762.1RNA-bindingmotifprotein,Xchromosome-likeisoformX1…	XP_021416767.1RNA-bindingmotifprotein,Xchromosome-likeisoformX5[Oncorhynchusmykiss];XP_021416766.1RNA-bindingmotifprotein,Xchromosome-likeisoformX4[Oncorhynchusmykiss];XP_021416764.1RNA-bindingmotifprotein,Xchromosome-likeisoformX3[Oncorhynchusmykiss];XP_021416763.1RNA-bindingmotifprotein,Xchromosome-likeisoformX2[Oncorhynchusmykiss];XP_021416762.1RNA-bindingmotifprotein,Xchromosome-likeisoformX1…	4;4;4;4;4	4;4;4;4;4	2;2;2;2;2	;;;;	5	4	4	2	4	4	4	4	3	4	2	4	3	3	4	4	4	4	4	3
XP_021416832.1	gene11359:106604709	XM_014199641.1	XP_014055116.1	LOC106604709	FALSE	FALSE	atlastin-3-like	511	3102	1	protein_coding	XP_021416832.1	gi|929088873|ref|XP_014055116.1|	98.08	416	7	1	1	415	1	416	0	823	XP_021416832.1atlastin-3-likeisoformX2[Oncorhynchusmykiss];XP_021416831.1atlastin-3-likeisoformX1[Oncorhynchusmykiss];XP_021416834.1atlastin-3-likeisoformX4[Oncorhynchusmykiss];XP_021416833.1atlastin-3-likeisoformX3[Oncorhynchusmykiss]	XP_021416832.1atlastin-3-likeisoformX2[Oncorhynchusmykiss];XP_021416831.1atlastin-3-likeisoformX1[Oncorhynchusmykiss]	12;12;4;4	12;12;4;4	0;0;0;0	;	4	12	12	0	11	12	12	10	12	12	12	12	12	12	12	11	12	12	10	12
XP_021416862.1	gene11342:106604696	XM_014199617.1	XP_014055092.1	LOC106604696	FALSE	FALSE	saxitoxin and tetrodotoxin-binding protein 2-like	203	977	1	protein_coding	XP_021416862.1	gi|929088830|ref|XP_014055092.1|	88.36	189	22	0	1	189	1	189	2e-91	333	XP_021416862.1saxitoxinandtetrodotoxin-bindingprotein2-like,partial[Oncorhynchusmykiss]	XP_021416862.1saxitoxinandtetrodotoxin-bindingprotein2-like,partial[Oncorhynchusmykiss]	4	4	4		1	4	4	4	1	4	4	4	4	4	2	0	2	0	0	1	4	4	4	4
XP_021416873.1	gene11335:106604691	XM_014199608.1	XP_014055083.1	LOC106604691	FALSE	FALSE	N-alpha-acetyltransferase 15, NatA auxiliary subunit-like	887	3854	1	protein_coding	XP_021416873.1	gi|929088816|ref|XP_014055084.1|	99.39	818	5	0	1	818	51	868	0	1689	XP_021416873.1N-alpha-acetyltransferase15,NatAauxiliarysubunitisoformX2[Oncorhynchusmykiss];XP_021416872.1N-alpha-acetyltransferase15,NatAauxiliarysubunitisoformX1[Oncorhynchusmykiss]	XP_021416873.1N-alpha-acetyltransferase15,NatAauxiliarysubunitisoformX2[Oncorhynchusmykiss];XP_021416872.1N-alpha-acetyltransferase15,NatAauxiliarysubunitisoformX1[Oncorhynchusmykiss]	5;5	5;5	2;2	;	2	5	5	2	4	4	3	3	5	4	3	3	4	3	3	4	4	3	3	5
XP_021416927.1	gene11306:106604666	XM_014199547.1	XP_014055022.1	LOC106604666	FALSE	FALSE	FACT complex subunit SSRP1-like	720	2769	1	protein_coding	XP_021416927.1	gi|929088705|ref|XP_014055024.1|	95.23	713	27	2	1	706	1	713	0	1294	XP_021416927.1FACTcomplexsubunitSSRP1-like[Oncorhynchusmykiss];XP_021439651.1FACTcomplexsubunitSSRP1-like[Oncorhynchusmykiss]	XP_021416927.1FACTcomplexsubunitSSRP1-like[Oncorhynchusmykiss];XP_021439651.1FACTcomplexsubunitSSRP1-like[Oncorhynchusmykiss]	4;2	4;2	4;2	;	2	4	4	4	4	3	3	4	4	2	3	3	3	3	3	4	3	3	4	4
XP_021416940.1	gene11291:106604654	XM_014199511.1	XP_014054986.1	LOC106604654	FALSE	FALSE	catenin delta-1-like	935	4952	1	protein_coding	XP_021416940.1	gi|929088634|ref|XP_014054986.1|	97.97	938	16	2	1	938	1	935	0	1849	XP_021416940.1catenindelta-1-likeisoformX2[Oncorhynchusmykiss];XP_021416939.1catenindelta-1-likeisoformX1[Oncorhynchusmykiss];XP_021439667.1catenindelta-1[Oncorhynchusmykiss]	XP_021416940.1catenindelta-1-likeisoformX2[Oncorhynchusmykiss];XP_021416939.1catenindelta-1-likeisoformX1[Oncorhynchusmykiss];XP_021439667.1catenindelta-1[Oncorhynchusmykiss]	2;2;1	2;2;1	1;1;0	;;	3	2	2	1	2	2	2	2	2	2	2	2	2	2	2	2	2	2	2	2
XP_021416965.1	gene11271:106604638	XM_014199477.1	XP_014054952.1	LOC106604638	FALSE	FALSE	beta-1,4-galactosyltransferase 1-like	360	4405	1	protein_coding	XP_021416965.1	gi|929088570|ref|XP_014054952.1|	96.39	360	13	0	1	360	1	360	0	729	XP_021416965.1beta-1,4-galactosyltransferase1-like[Oncorhynchusmykiss]	XP_021416965.1beta-1,4-galactosyltransferase1-like[Oncorhynchusmykiss]	4	4	3		1	4	4	3	4	4	4	4	4	4	4	4	2	3	4	4	4	4	4	4
XP_021416968.1	gene11267:100196366	NM_001141395.1	NP_001134867.1	nps3a	FALSE	FALSE	NipSnap homolog 3A	252	1471	1	protein_coding	XP_021416968.1	gi|213512760|ref|NP_001134867.1|	96.83	252	8	0	1	252	1	252	4e-145	512	XP_021416968.1proteinNipSnaphomolog3A-like[Oncorhynchusmykiss]	XP_021416968.1proteinNipSnaphomolog3A-like[Oncorhynchusmykiss]	4	4	4		1	4	4	4	3	4	4	4	4	4	4	4	4	4	4	3	4	4	4	4
XP_021416974.1	gene4252:106582899	XM_014166496.1	XP_014021971.1	LOC106582899	FALSE	FALSE	mannosyl-oligosaccharide 1,2-alpha-mannosidase IC-like	648	4971	1	protein_coding	XP_021416974.1	gi|929066234|ref|XP_014021971.1|	99.38	648	4	0	1	648	1	648	0	1334	XP_021416974.1mannosyl-oligosaccharide1,2-alpha-mannosidaseIA-like[Oncorhynchusmykiss];XP_021438429.1mannosyl-oligosaccharide1,2-alpha-mannosidaseIA-like[Oncorhynchusmykiss]	XP_021416974.1mannosyl-oligosaccharide1,2-alpha-mannosidaseIA-like[Oncorhynchusmykiss];XP_021438429.1mannosyl-oligosaccharide1,2-alpha-mannosidaseIA-like[Oncorhynchusmykiss]	8;6	8;6	8;6	;	2	8	8	8	7	5	6	7	7	8	4	7	5	4	6	7	5	6	7	7
XP_021416997.1	gene11250:106604623	XM_014199442.1	XP_014054917.1	LOC106604623	FALSE	FALSE	signal recognition particle subunit SRP72-like	673	2972	1	protein_coding	XP_021416997.1	gi|929088507|ref|XP_014054917.1|	98.07	673	13	0	1	673	1	673	0	1370	XP_021416997.1signalrecognitionparticlesubunitSRP72-likeisoformX2[Oncorhynchusmykiss];XP_021416996.1signalrecognitionparticlesubunitSRP72-likeisoformX1[Oncorhynchusmykiss];XP_021416995.1signalrecognitionparticlesubunitSRP72-likeisoformX1[Oncorhynchusmykiss]	XP_021416997.1signalrecognitionparticlesubunitSRP72-likeisoformX2[Oncorhynchusmykiss];XP_021416996.1signalrecognitionparticlesubunitSRP72-likeisoformX1[Oncorhynchusmykiss];XP_021416995.1signalrecognitionparticlesubunitSRP72-likeisoformX1[Oncorhynchusmykiss]	5;5;5	2;2;2	2;2;2	;;	3	5	2	2	5	4	4	5	3	5	4	4	4	4	4	2	2	2	2	2
XP_021417017.1	gene11794:106605182	XM_014200562.1	XP_014056037.1	LOC106605182	FALSE	FALSE	fatty acid-binding protein 10-A, liver basic-like	126	553	1	protein_coding	XP_021417017.1	gi|929090592|ref|XP_014056037.1|	97.62	126	3	0	1	126	1	126	7e-68	253	XP_021417017.1fattyacid-bindingprotein10-A,liverbasic-like[Oncorhynchusmykiss]	XP_021417017.1fattyacid-bindingprotein10-A,liverbasic-like[Oncorhynchusmykiss]	7	7	5		1	7	7	5	7	6	6	7	6	7	7	7	7	7	7	7	6	6	7	6
XP_021417018.1	gene11230:106604595	XM_014199388.1	XP_014054863.1	LOC106604595	FALSE	FALSE	nucleophosmin-like	308	2307	1	protein_coding	XP_021417018.1	gi|929088416|ref|XP_014054863.1|	87.34	308	10	2	1	279	1	308	1e-128	458	XP_021417018.1nucleophosmin-likeisoformX3[Oncorhynchusmykiss];XP_021417015.1nucleophosmin-likeisoformX1[Oncorhynchusmykiss];XP_021439734.1nucleophosmin-like[Oncorhynchusmykiss];XP_021417016.1nucleophosmin-likeisoformX2[Oncorhynchusmykiss]	XP_021417018.1nucleophosmin-likeisoformX3[Oncorhynchusmykiss];XP_021417015.1nucleophosmin-likeisoformX1[Oncorhynchusmykiss];XP_021439734.1nucleophosmin-like[Oncorhynchusmykiss];XP_021417016.1nucleophosmin-likeisoformX2[Oncorhynchusmykiss]	2;2;2;1	2;2;2;1	2;2;2;1	;;;	4	2	2	2	2	2	2	2	2	2	2	2	2	2	2	2	2	2	2	2
XP_021417045.1	gene11217:106604570	XM_014199337.1	XP_014054812.1	LOC106604570	FALSE	FALSE	calnexin-like	634	4888	1	protein_coding	XP_021417045.1	gi|929088316|ref|XP_014054812.1|	96.38	635	13	3	1	626	1	634	0	1124	XP_021417045.1calnexin-like[Oncorhynchusmykiss]	XP_021417045.1calnexin-like[Oncorhynchusmykiss]	9	3	3		1	9	3	3	9	8	9	9	8	9	7	7	7	7	8	3	3	3	3	3
XP_021417046.1	gene11214:100195312	NM_001140341.1	NP_001133813.1	sqstm	FALSE	FALSE	Sequestosome-1	463	2119	1	protein_coding	XP_021417046.1	gi|213513646|ref|NP_001133813.1|	95.25	463	19	2	1	460	1	463	0	784	XP_021417046.1sequestosome-1-like[Oncorhynchusmykiss];XP_021439759.1sequestosome-1-like[Oncorhynchusmykiss]	XP_021417046.1sequestosome-1-like[Oncorhynchusmykiss]	8;2	8;2	8;2		2	8	8	8	8	8	6	7	7	8	4	4	1	3	3	8	8	6	7	7
XP_021417060.1	gene11206:106604514	XM_014199188.1	XP_014054663.1	LOC106604514	FALSE	FALSE	eukaryotic translation initiation factor 4E-1A	216	1212	1	protein_coding	XP_021417060.1	gi|929088038|ref|XP_014054663.1|	97.69	216	4	1	1	215	1	216	1e-122	437	XP_021417060.1eukaryotictranslationinitiationfactor4E-1A[Oncorhynchusmykiss]	XP_021417060.1eukaryotictranslationinitiationfactor4E-1A[Oncorhynchusmykiss]	4	4	3		1	4	4	3	4	3	3	3	4	4	4	3	4	3	3	4	3	3	3	4
XP_021417061.1	gene11205:100195992	NM_001141021.2	NP_001134493.1	adhx	FALSE	FALSE	Alcohol dehydrogenase class-3	376	1330	1	protein_coding	XP_021417061.1	gi|213512026|ref|NP_001134493.1|	98.4	376	6	0	1	376	1	376	0	756	XP_021417061.1alcoholdehydrogenaseclass-3[Oncorhynchusmykiss]	XP_021417061.1alcoholdehydrogenaseclass-3[Oncorhynchusmykiss]	12	12	12		1	12	12	12	11	10	11	10	10	11	10	11	12	10	11	11	10	11	10	10
XP_021417062.1	gene11204:106604513	XM_014199187.1	XP_014054662.1	LOC106604513	FALSE	FALSE	H/ACA ribonucleoprotein complex subunit 1-like	230	1719	1	protein_coding	XP_021417062.1	gi|929088036|ref|XP_014054662.1|	100	104	0	0	51	154	51	154	9e-60	228	XP_021417062.1H/ACAribonucleoproteincomplexsubunit1-like[Oncorhynchusmykiss];XP_021439774.1H/ACAribonucleoproteincomplexsubunit1[Oncorhynchusmykiss]	XP_021417062.1H/ACAribonucleoproteincomplexsubunit1-like[Oncorhynchusmykiss];XP_021439774.1H/ACAribonucleoproteincomplexsubunit1[Oncorhynchusmykiss]	2;2	2;2	2;2	;	2	2	2	2	2	2	1	1	0	2	2	2	2	1	1	2	2	1	1	0
XP_021417067.1	gene11201:106604515	XM_014199191.1	XP_014054666.1	LOC106604515	FALSE	FALSE	elongation of very long chain fatty acids protein 6	276	2126	1	protein_coding	XP_021417067.1	gi|929088040|ref|XP_014054664.1|	99.28	276	2	0	1	276	1	276	1e-162	570	XP_021417067.1elongationofverylongchainfattyacidsprotein6[Oncorhynchusmykiss];XP_021439779.1elongationofverylongchainfattyacidsprotein6-like[Oncorhynchusmykiss];XP_021422997.1elongationofverylongchainfattyacidsprotein6-like[Oncorhynchusmykiss];XP_021431780.1elongationofverylongchainfattyacidsprotein6-likeisoformX2[Oncorhynchusmykiss];XP_021431779.1elongationofverylongchainfattyacidsprotein6-likei…	XP_021417067.1elongationofverylongchainfattyacidsprotein6[Oncorhynchusmykiss];XP_021439779.1elongationofverylongchainfattyacidsprotein6-like[Oncorhynchusmykiss]	5;3;1;1;1;1	5;3;1;1;1;1	5;3;1;1;1;1	;	6	5	5	5	5	4	5	1	3	1	5	5	2	5	5	5	4	5	1	3
XP_021417073.1	gene11195:106604521	XM_014199199.1	XP_014054674.1	aga	FALSE	FALSE	aspartylglucosaminidase	334	1392	1	protein_coding	XP_021417073.1	gi|929088056|ref|XP_014054673.1|	96.71	334	11	0	1	334	1	334	0	645	XP_021417073.1N(4)-(beta-N-acetylglucosaminyl)-L-asparaginase[Oncorhynchusmykiss]	XP_021417073.1N(4)-(beta-N-acetylglucosaminyl)-L-asparaginase[Oncorhynchusmykiss]	2	2	2		1	2	2	2	2	2	1	1	1	2	1	1	2	1	1	2	2	1	1	1
XP_021417077.1	gene11192:106604524	XM_014199208.1	XP_014054683.1	tdo2	FALSE	FALSE	tryptophan 2,3-dioxygenase	407	1811	1	protein_coding	XP_021417077.1	gi|929088076|ref|XP_014054683.1|	97.79	407	9	0	1	407	1	407	0	808	XP_021417077.1tryptophan2,3-dioxygenaseA-like[Oncorhynchusmykiss]	XP_021417077.1tryptophan2,3-dioxygenaseA-like[Oncorhynchusmykiss]	4	1	1		1	4	1	1	3	2	2	2	2	2	4	2	2	3	1	0	0	0	0	0
XP_021417095.1	gene18551:106611557	XM_014211901.1	XP_014067376.1	LOC106611557	FALSE	FALSE	electron transfer flavoprotein-ubiquinone oxidoreductase, mitochondrial-like	620	2466	1	protein_coding	XP_021417095.1	gi|929112098|ref|XP_014067376.1|	96.13	620	24	0	6	625	1	620	0	1248	XP_021417095.1electrontransferflavoprotein-ubiquinoneoxidoreductase,mitochondrial[Oncorhynchusmykiss]	XP_021417095.1electrontransferflavoprotein-ubiquinoneoxidoreductase,mitochondrial[Oncorhynchusmykiss]	7	2	2		1	7	2	2	6	5	7	7	3	6	5	6	5	6	6	2	2	2	2	1
XP_021417096.1	gene11181:106604531	XM_014199227.1	XP_014054702.1	LOC106604531	FALSE	FALSE	peptidyl-prolyl cis-trans isomerase D-like	371	1540	1	protein_coding	XP_021417096.1	gi|929088109|ref|XP_014054702.1|	97.3	371	10	0	1	371	1	371	0	734	XP_021417096.1peptidyl-prolylcis-transisomeraseD[Oncorhynchusmykiss]	XP_021417096.1peptidyl-prolylcis-transisomeraseD[Oncorhynchusmykiss]	4	2	2		1	4	2	2	4	4	3	3	4	4	4	3	4	4	4	2	2	1	1	2
XP_021417106.1	gene11177:106604536	XM_014199256.1	XP_014054731.1	LOC106604536	FALSE	FALSE	dihydropteridine reductase-like	236	1242	1	protein_coding	XP_021417106.1	gi|929088164|ref|XP_014054731.1|	98.73	236	3	0	1	236	1	236	4e-133	472	XP_021417106.1dihydropteridinereductase-like[Oncorhynchusmykiss]	XP_021417106.1dihydropteridinereductase-like[Oncorhynchusmykiss]	7	2	2		1	7	2	2	7	7	6	7	7	7	4	6	5	7	6	2	2	2	2	2
XP_021417124.1	gene11786:106605136	XM_014200482.1	XP_014055957.1	LOC106605136	FALSE	FALSE	ras-related GTP-binding protein C-like	381	1913	1	protein_coding	XP_021417124.1	gi|929090440|ref|XP_014055957.1|	99.74	381	1	0	1	381	1	381	0	783	XP_021417124.1ras-relatedGTP-bindingproteinC[Oncorhynchusmykiss];XP_021415735.1ras-relatedGTP-bindingproteinC-like[Oncorhynchusmykiss];XP_021438445.1ras-relatedGTP-bindingproteinC-like[Oncorhynchusmykiss];XP_021429559.1ras-relatedGTP-bindingproteinD-like[Oncorhynchusmykiss]	XP_021417124.1ras-relatedGTP-bindingproteinC[Oncorhynchusmykiss];XP_021415735.1ras-relatedGTP-bindingproteinC-like[Oncorhynchusmykiss];XP_021438445.1ras-relatedGTP-bindingproteinC-like[Oncorhynchusmykiss]	3;3;2;1	3;3;2;1	3;3;2;1	;;	4	3	3	3	3	3	3	3	3	3	3	3	3	3	3	3	3	3	3	3
XP_021417129.1	gene11159:100136484	XM_014199302.1	XP_014054777.1	LOC100136484	FALSE	FALSE	glutathione S-transferase P	208	921	1	protein_coding	XP_021417129.1	gi|929088249|ref|XP_014054777.1|	96.15	208	8	0	1	208	1	208	1e-115	414	XP_021417129.1glutathioneS-transferaseP-like[Oncorhynchusmykiss]	XP_021417129.1glutathioneS-transferaseP-like[Oncorhynchusmykiss]	12	12	6		1	12	12	6	12	12	12	12	12	12	12	12	12	12	12	12	12	12	12	12
XP_021417220.1	gene11636:106604987	XM_014200165.1	XP_014055640.1	LOC106604987	FALSE	FALSE	complement C3	1664	5423	1	protein_coding	XP_021417220.1	gi|929089857|ref|XP_014055640.1|	93.01	1531	105	1	1	1531	1	1529	0	2909	XP_021417220.1complementC3-like[Oncorhynchusmykiss];CON__Q2UVX4	XP_021417220.1complementC3-like[Oncorhynchusmykiss]	42;1	9;0	9;0		2	42	9	9	41	38	37	37	34	40	27	32	27	35	30	9	8	8	8	5
XP_021417223.1	gene11100:106604481	XM_014199132.1	XP_014054607.1	gsr	FALSE	FALSE	glutathione reductase	503	2054	1	protein_coding	XP_021417223.1	gi|929087937|ref|XP_014054608.1|	99.4	502	3	0	1	502	1	502	0	1032	XP_021417223.1glutathionereductase,mitochondrialisoformX2[Oncorhynchusmykiss];XP_021417222.1glutathionereductase,mitochondrialisoformX1[Oncorhynchusmykiss]	XP_021417223.1glutathionereductase,mitochondrialisoformX2[Oncorhynchusmykiss];XP_021417222.1glutathionereductase,mitochondrialisoformX1[Oncorhynchusmykiss]	10;10	10;10	10;10	;	2	10	10	10	9	9	9	9	9	10	8	10	9	9	10	9	9	9	9	9
XP_021417240.1	gene11636:106604987	XM_014200165.1	XP_014055640.1	LOC106604987	FALSE	FALSE	complement C3	1664	5423	1	protein_coding	XP_021417240.1	gi|929089857|ref|XP_014055640.1|	91.57	1530	121	2	1	1523	1	1529	0	2872	XP_021417240.1LOWQUALITYPROTEIN:complementC3-like[Oncorhynchusmykiss]	XP_021417240.1LOWQUALITYPROTEIN:complementC3-like[Oncorhynchusmykiss]	45	21	15		1	45	21	15	40	38	36	37	38	40	35	34	27	32	29	17	15	13	14	17
XP_021417243.1	gene11086:100380635	XM_014199150.1	XP_014054625.1	mcm7	FALSE	FALSE	minichromosome maintenance complex component 7	727	2978	1	protein_coding	XP_021417243.1	gi|929087968|ref|XP_014054625.1|	99.54	654	3	0	1	654	74	727	0	1350	XP_021417243.1DNAreplicationlicensingfactorMCM7isoformX3[Oncorhynchusmykiss];XP_021417242.1DNAreplicationlicensingfactorMCM7isoformX2[Oncorhynchusmykiss];XP_021417241.1DNAreplicationlicensingfactorMCM7isoformX1[Oncorhynchusmykiss]	XP_021417243.1DNAreplicationlicensingfactorMCM7isoformX3[Oncorhynchusmykiss];XP_021417242.1DNAreplicationlicensingfactorMCM7isoformX2[Oncorhynchusmykiss];XP_021417241.1DNAreplicationlicensingfactorMCM7isoformX1[Oncorhynchusmykiss]	3;3;3	3;3;3	3;3;3	;;	3	3	3	3	3	2	3	1	3	2	3	3	3	3	2	3	2	3	1	3
XP_021417252.1	gene11636:106604987	XM_014200165.1	XP_014055640.1	LOC106604987	FALSE	FALSE	complement C3	1664	5423	1	protein_coding	XP_021417252.1	gi|929089857|ref|XP_014055640.1|	95.55	1664	74	0	13	1676	1	1664	0	3293	XP_021417252.1complementC3[Oncorhynchusmykiss]	XP_021417252.1complementC3[Oncorhynchusmykiss]	68	68	25		1	68	68	25	66	64	65	65	60	65	52	62	56	60	59	66	64	65	65	60
XP_021417257.1	gene11053:106604358	XM_014198913.1	XP_014054388.1	LOC106604358	FALSE	FALSE	MORC family CW-type zinc finger protein 3-like	912	3288	1	protein_coding	XP_021417257.1	gi|929087531|ref|XP_014054391.1|	97.2	464	10	1	14	474	1	464	0	935	XP_021417257.1MORCfamilyCW-typezincfingerprotein3-like[Oncorhynchusmykiss];XP_021439090.1MORCfamilyCW-typezincfingerprotein3-like[Oncorhynchusmykiss]	XP_021417257.1MORCfamilyCW-typezincfingerprotein3-like[Oncorhynchusmykiss];XP_021439090.1MORCfamilyCW-typezincfingerprotein3-like[Oncorhynchusmykiss]	3;3	3;3	3;3	;	2	3	3	3	2	2	2	2	2	3	3	3	2	2	2	2	2	2	2	2
XP_021417266.1	gene11049:106604364	XM_014198920.1	XP_014054395.1	LOC106604364	FALSE	FALSE	thiosulfate sulfurtransferase/rhodanese-like domain-containing protein 1	133	664	1	protein_coding	XP_021417266.1	gi|929087539|ref|XP_014054395.1|	98.48	132	2	0	4	135	1	132	3e-72	268	XP_021417266.1thiosulfatesulfurtransferase/rhodanese-likedomain-containingprotein1[Oncorhynchusmykiss]	XP_021417266.1thiosulfatesulfurtransferase/rhodanese-likedomain-containingprotein1[Oncorhynchusmykiss]	4	4	4		1	4	4	4	4	4	4	4	4	4	4	4	4	4	4	4	4	4	4	4
XP_021417279.1	gene11037:100195094	XM_014198900.1	XP_014054375.1	macd1	FALSE	FALSE	MACRO domain-containing protein 1	398	2243	1	protein_coding	XP_021417279.1	gi|929087507|ref|XP_014054377.1|	98.47	392	5	1	1	392	1	391	0	791	XP_021417279.1O-acetyl-ADP-ribosedeacetylaseMACROD1-likeisoformX1[Oncorhynchusmykiss];XP_021417280.1O-acetyl-ADP-ribosedeacetylaseMACROD1-likeisoformX2[Oncorhynchusmykiss]	XP_021417279.1O-acetyl-ADP-ribosedeacetylaseMACROD1-likeisoformX1[Oncorhynchusmykiss];XP_021417280.1O-acetyl-ADP-ribosedeacetylaseMACROD1-likeisoformX2[Oncorhynchusmykiss]	9;8	9;8	9;8	;	2	9	9	9	9	9	9	9	9	9	8	9	8	8	9	9	9	9	9	9
XP_021417290.1	gene11029:106604381	XM_014198947.1	XP_014054422.1	LOC106604381	FALSE	FALSE	neutral alpha-glucosidase AB-like	942	4398	1	protein_coding	XP_021417290.1	gi|929087594|ref|XP_014054424.1|	98.81	928	11	0	1	928	1	928	0	1913	XP_021417290.1neutralalpha-glucosidaseAB-like[Oncorhynchusmykiss]	XP_021417290.1neutralalpha-glucosidaseAB-like[Oncorhynchusmykiss]	20	4	4		1	20	4	4	17	19	19	17	16	19	16	15	14	20	18	2	3	4	3	3
XP_021417293.1	gene11026:106604384	XM_014198954.1	XP_014054429.1	LOC106604384	FALSE	FALSE	EH domain-containing protein 1-like	534	4384	1	protein_coding	XP_021417293.1	gi|929087602|ref|XP_014054429.1|	99.25	534	4	0	1	534	1	534	0	1092	XP_021417293.1EHdomain-containingprotein1-like[Oncorhynchusmykiss];XP_021417292.1EHdomain-containingprotein1-like[Oncorhynchusmykiss];XP_021439105.1EHdomain-containingprotein1-like[Oncorhynchusmykiss]	XP_021417293.1EHdomain-containingprotein1-like[Oncorhynchusmykiss];XP_021417292.1EHdomain-containingprotein1-like[Oncorhynchusmykiss];XP_021439105.1EHdomain-containingprotein1-like[Oncorhynchusmykiss]	7;7;5	3;3;2	3;3;2	;;	3	7	3	3	7	7	7	7	5	7	7	7	7	7	7	3	3	3	3	2
XP_021417295.1	gene11770:106605124	XM_014200457.1	XP_014055932.1	LOC106605124	FALSE	FALSE	CD2-associated protein-like	488	2056	1	protein_coding	XP_021417295.1	gi|929090395|ref|XP_014055932.1|	97.53	486	12	0	1	486	1	486	0	962	XP_021417295.1CD2-associatedprotein-likeisoformX1[Oncorhynchusmykiss]	XP_021417295.1CD2-associatedprotein-likeisoformX1[Oncorhynchusmykiss]	4	4	1		1	4	4	1	3	3	3	4	3	3	3	4	4	4	3	3	3	3	4	3
XP_021417303.1	gene11770:106605124	XM_014200457.1	XP_014055932.1	LOC106605124	FALSE	FALSE	CD2-associated protein-like	488	2056	1	protein_coding	XP_021417303.1	gi|929090397|ref|XP_014055933.1|	97.44	468	12	0	1	468	1	468	0	927	XP_021417303.1CD2-associatedprotein-likeisoformX2[Oncorhynchusmykiss]	XP_021417303.1CD2-associatedprotein-likeisoformX2[Oncorhynchusmykiss]	4	1	1		1	4	1	1	3	3	3	4	2	3	2	3	3	3	2	1	1	1	1	0
XP_021417336.1	gene9562:106603036	XM_014196156.1	XP_014051631.1	LOC106603036	FALSE	FALSE	ubiquitin-conjugating enzyme E2 D2	147	2049	1	protein_coding	XP_021417336.1	gi|929082319|ref|XP_014051631.1|	100	118	0	0	1	118	30	147	1e-66	249	XP_021417336.1ubiquitin-conjugatingenzymeE2D2isoformX2[Oncorhynchusmykiss];XP_021474470.1ubiquitin-conjugatingenzymeE2D2[Oncorhynchusmykiss];XP_021447124.1ubiquitin-conjugatingenzymeE2D2[Oncorhynchusmykiss];XP_021439468.1ubiquitin-conjugatingenzymeE2D2-likeisoformX2[Oncorhynchusmykiss];XP_021439131.1ubiquitin-conjugatingenzymeE2D2[Oncorhynchusmykiss];XP_021430612.1ubiquitin-conjugatingenzymeE2D2-…	XP_021417336.1ubiquitin-conjugatingenzymeE2D2isoformX2[Oncorhynchusmykiss];XP_021474470.1ubiquitin-conjugatingenzymeE2D2[Oncorhynchusmykiss];XP_021447124.1ubiquitin-conjugatingenzymeE2D2[Oncorhynchusmykiss];XP_021439468.1ubiquitin-conjugatingenzymeE2D2-likeisoformX2[Oncorhynchusmykiss];XP_021439131.1ubiquitin-conjugatingenzymeE2D2[Oncorhynchusmykiss];XP_021430612.1ubiquitin-conjugatingenzymeE2D2-…	2;2;2;2;2;2;2;2;2	2;2;2;2;2;2;2;2;2	2;2;2;2;2;2;2;2;2	;;;;;;;;	9	2	2	2	2	2	2	2	2	2	2	2	2	2	2	2	2	2	2	2
XP_021417350.1	gene10958:100380413	XM_014198833.1	XP_014054308.1	hnrh1	FALSE	FALSE	Heterogeneous nuclear ribonucleoprotein H	407	2192	1	protein_coding	XP_021417350.1	gi|929087379|ref|XP_014054309.1|	99.47	378	2	0	1	378	1	378	0	771	XP_021417350.1heterogeneousnuclearribonucleoproteinH-like[Oncorhynchusmykiss];XP_021473222.1heterogeneousnuclearribonucleoproteinH-likeisoformX4[Oncorhynchusmykiss];XP_021473221.1heterogeneousnuclearribonucleoproteinH-likeisoformX3[Oncorhynchusmykiss];XP_021473220.1heterogeneousnuclearribonucleoproteinH-likeisoformX2[Oncorhynchusmykiss];XP_021473219.1heterogeneousnuclearribonucleoproteinH-likeiso…	XP_021417350.1heterogeneousnuclearribonucleoproteinH-like[Oncorhynchusmykiss]	6;1;1;1;1	6;1;1;1;1	2;0;0;0;0		5	6	6	2	5	5	4	3	5	4	3	3	4	3	4	5	5	4	3	5
XP_021417383.1	gene10937:106604299	XM_014198806.1	XP_014054281.1	LOC106604299	FALSE	FALSE	long-chain-fatty-acid--CoA ligase 4-like	711	3758	1	protein_coding	XP_021417383.1	gi|929087324|ref|XP_014054281.1|	98.31	711	12	0	1	711	1	711	0	1455	XP_021417383.1long-chain-fatty-acid--CoAligase4-likeisoformX2[Oncorhynchusmykiss];XP_021417382.1long-chain-fatty-acid--CoAligase4-likeisoformX1[Oncorhynchusmykiss];XP_021417381.1long-chain-fatty-acid--CoAligase4-likeisoformX1[Oncorhynchusmykiss];XP_021417379.1long-chain-fatty-acid--CoAligase4-likeisoformX1[Oncorhynchusmykiss];XP_021468809.1long-chain-fatty-acid--CoAligase3-like[Oncorhynchusmykiss…	XP_021417383.1long-chain-fatty-acid--CoAligase4-likeisoformX2[Oncorhynchusmykiss];XP_021417382.1long-chain-fatty-acid--CoAligase4-likeisoformX1[Oncorhynchusmykiss];XP_021417381.1long-chain-fatty-acid--CoAligase4-likeisoformX1[Oncorhynchusmykiss];XP_021417379.1long-chain-fatty-acid--CoAligase4-likeisoformX1[Oncorhynchusmykiss]	18;18;18;18;1;1;1;1;1;1	18;18;18;18;1;1;1;1;1;1	17;17;17;17;0;0;0;0;0;0	;;;	10	18	18	17	17	18	16	13	18	15	15	15	14	16	17	17	18	16	13	18
XP_021417439.1	gene10893:106604248	XM_014198714.1	XP_014054189.1	LOC106604248	FALSE	FALSE	sterol-4-alpha-carboxylate 3-dehydrogenase, decarboxylating-like	345	1968	1	protein_coding	XP_021417439.1	gi|929087152|ref|XP_014054189.1|	97.1	345	10	0	1	345	1	345	0	658	XP_021417439.1sterol-4-alpha-carboxylate3-dehydrogenase,decarboxylating-like[Oncorhynchusmykiss];XP_021417438.1sterol-4-alpha-carboxylate3-dehydrogenase,decarboxylating-like[Oncorhynchusmykiss]	XP_021417439.1sterol-4-alpha-carboxylate3-dehydrogenase,decarboxylating-like[Oncorhynchusmykiss];XP_021417438.1sterol-4-alpha-carboxylate3-dehydrogenase,decarboxylating-like[Oncorhynchusmykiss]	8;8	1;1	1;1	;	2	8	1	1	7	7	7	7	7	7	8	7	6	8	8	0	0	0	0	0
XP_021417488.1	gene10824:100380594	NM_001173879.1	NP_001167350.1	peam3	FALSE	FALSE	phosphoethanolamine N-methyltransferase 3	495	2643	1	protein_coding	XP_021417488.1	gi|291190262|ref|NP_001167350.1|	96.16	495	19	0	1	495	1	495	0	1000	XP_021417488.1phosphoethanolamineN-methyltransferase3-likeisoformX2[Oncorhynchusmykiss];XP_021417487.1phosphoethanolamineN-methyltransferase3-likeisoformX1[Oncorhynchusmykiss]	XP_021417488.1phosphoethanolamineN-methyltransferase3-likeisoformX2[Oncorhynchusmykiss];XP_021417487.1phosphoethanolamineN-methyltransferase3-likeisoformX1[Oncorhynchusmykiss]	26;26	26;26	11;11	;	2	26	26	11	26	23	25	25	24	23	23	22	24	26	23	26	23	25	25	24
XP_021417525.1	gene10838:100195327	NM_001140356.1	NP_001133828.1	sap3	FALSE	FALSE	Ganglioside GM2 activator	197	1885	1	protein_coding	XP_021417525.1	gi|213511628|ref|NP_001133828.1|	94.95	198	9	1	1	198	1	197	2e-108	389	XP_021417525.1gangliosideGM2activator-like[Oncorhynchusmykiss]	XP_021417525.1gangliosideGM2activator-like[Oncorhynchusmykiss]	2	2	2		1	2	2	2	1	1	2	1	2	2	1	1	2	2	1	1	1	2	1	2
XP_021417526.1	gene11752:106605110	XM_014200428.1	XP_014055903.1	mecr	FALSE	FALSE	mitochondrial trans-2-enoyl-CoA reductase	404	1874	1	protein_coding	XP_021417526.1	gi|929090345|ref|XP_014055904.1|	98.08	313	6	0	1	313	88	400	4e-180	629	XP_021417526.1enoyl-[acyl-carrier-protein]reductase,mitochondrialisoformX3[Oncorhynchusmykiss];XP_021417517.1enoyl-[acyl-carrier-protein]reductase,mitochondrialisoformX3[Oncorhynchusmykiss];XP_021417510.1enoyl-[acyl-carrier-protein]reductase,mitochondrialisoformX2[Oncorhynchusmykiss];XP_021417503.1enoyl-[acyl-carrier-protein]reductase,mitochondrialisoformX1[Oncorhynchusmykiss]	XP_021417526.1enoyl-[acyl-carrier-protein]reductase,mitochondrialisoformX3[Oncorhynchusmykiss];XP_021417517.1enoyl-[acyl-carrier-protein]reductase,mitochondrialisoformX3[Oncorhynchusmykiss];XP_021417510.1enoyl-[acyl-carrier-protein]reductase,mitochondrialisoformX2[Oncorhynchusmykiss];XP_021417503.1enoyl-[acyl-carrier-protein]reductase,mitochondrialisoformX1[Oncorhynchusmykiss]	2;2;2;2	2;2;2;2	2;2;2;2	;;;	4	2	2	2	2	2	2	2	1	2	1	2	2	2	1	2	2	2	2	1
XP_021417537.1	gene19285:106612274	XM_014213290.1	XP_014068765.1	LOC106612274	FALSE	FALSE	neuroblast differentiation-associated protein AHNAK-like	4713	15678	1	protein_coding	XP_021417537.1	gi|929114685|ref|XP_014068765.1|	60.91	4479	734	91	459	3973	288	4713	0	4132	XP_021417537.1neuroblastdifferentiation-associatedproteinAHNAK-like[Oncorhynchusmykiss]	XP_021417537.1neuroblastdifferentiation-associatedproteinAHNAK-like[Oncorhynchusmykiss]	5	2	2		1	5	2	2	4	3	4	4	4	5	4	3	4	4	3	1	0	1	1	1
XP_021417538.1	gene19286:100196611	NM_001141640.1	NP_001135112.1	ef1g	FALSE	TRUE	Elongation factor 1-gamma	442	2456	1	protein_coding	XP_021417538.1	gi|213515516|ref|NP_001135112.1|	95.55	337	12	1	1	337	1	334	0	633	XP_021417538.1elongationfactor1-gamma-like[Oncorhynchusmykiss]	XP_021417538.1elongationfactor1-gamma-like[Oncorhynchusmykiss]	19	2	2		1	19	2	2	18	17	18	18	18	18	18	18	18	18	18	2	2	2	2	2
XP_021417556.1	gene10682:106604109	XM_014198507.1	XP_014053982.1	faf2	FALSE	FALSE	Fas associated factor family member 2	445	1974	1	protein_coding	XP_021417556.1	gi|929086756|ref|XP_014053982.1|	98.65	445	6	0	1	445	1	445	0	905	XP_021417556.1FAS-associatedfactor2[Oncorhynchusmykiss]	XP_021417556.1FAS-associatedfactor2[Oncorhynchusmykiss]	5	5	2		1	5	5	2	4	3	1	3	3	2	1	2	2	1	2	4	3	1	3	3
XP_021417599.1	gene11748:106605105	XM_014200421.1	XP_014055896.1	LOC106605105	FALSE	FALSE	cytochrome P450 4B1-like	539	2123	1	protein_coding	XP_021417599.1	gi|929090332|ref|XP_014055897.1|	98.46	519	8	0	1	519	1	519	0	1071	XP_021417599.1cytochromeP4504B1-likeisoformX1[Oncorhynchusmykiss];XP_021417608.1cytochromeP4504B1-likeisoformX2[Oncorhynchusmykiss]	XP_021417599.1cytochromeP4504B1-likeisoformX1[Oncorhynchusmykiss];XP_021417608.1cytochromeP4504B1-likeisoformX2[Oncorhynchusmykiss]	12;10	3;2	3;2	;	2	12	3	3	11	11	12	11	11	11	11	11	11	11	12	2	3	3	2	3
XP_021417623.1	gene49775:100194839	NM_001139868.1	NP_001133340.1	sfpq	FALSE	FALSE	splicing factor proline/glutamine rich (polypyrimidine tract binding protein associated)	641	2342	1	protein_coding	XP_021417623.1	gi|929309788|ref|XP_014032560.1|	84.92	630	65	3	1	629	1	601	0	927	XP_021417623.1splicingfactor,proline-andglutamine-rich-likeisoformX2[Oncorhynchusmykiss];XP_021417622.1splicingfactor,proline-andglutamine-rich-likeisoformX1[Oncorhynchusmykiss];XP_021427551.1splicingfactor,proline-andglutamine-rich-like[Oncorhynchusmykiss]	XP_021417623.1splicingfactor,proline-andglutamine-rich-likeisoformX2[Oncorhynchusmykiss];XP_021417622.1splicingfactor,proline-andglutamine-rich-likeisoformX1[Oncorhynchusmykiss];XP_021427551.1splicingfactor,proline-andglutamine-rich-like[Oncorhynchusmykiss]	4;4;3	4;4;3	4;4;3	;;	3	4	4	4	1	2	1	3	2	3	3	2	3	3	2	1	2	1	3	2
XP_021417654.1	gene31095:100195055	NM_001140084.1	NP_001133556.1	cap1	FALSE	FALSE	Cap1 CAP, adenylate cyclase-associated protein 1	467	2696	1	protein_coding	XP_021417654.1	gi|929241985|ref|XP_013996978.1|	94.02	468	14	3	1	463	1	459	0	835	XP_021417654.1adenylylcyclase-associatedprotein1-like[Oncorhynchusmykiss];XP_021428279.1adenylylcyclase-associatedprotein2-likeisoformX2[Oncorhynchusmykiss];XP_021428278.1adenylylcyclase-associatedprotein2-likeisoformX2[Oncorhynchusmykiss];XP_021428277.1adenylylcyclase-associatedprotein2-likeisoformX1[Oncorhynchusmykiss]	XP_021417654.1adenylylcyclase-associatedprotein1-like[Oncorhynchusmykiss]	15;1;1;1	15;1;1;1	9;0;0;0		4	15	15	9	15	14	14	15	14	14	13	12	12	14	13	15	14	14	15	14
XP_021417683.1	gene31096:106570032	XM_014141935.1	XP_013997410.1	LOC106570032	FALSE	FALSE	palmitoyl-protein thioesterase 1-like	303	1331	1	protein_coding	XP_021417683.1	gi|929242795|ref|XP_013997410.1|	98.02	303	6	0	33	335	1	303	3e-177	620	XP_021417683.1palmitoyl-proteinthioesterase1-like[Oncorhynchusmykiss]	XP_021417683.1palmitoyl-proteinthioesterase1-like[Oncorhynchusmykiss]	5	5	3		1	5	5	3	4	4	4	4	4	5	5	4	5	4	4	4	4	4	4	4
XP_021417684.1	gene31146:106569991	XM_014141819.1	XP_013997294.1	LOC106569991	FALSE	FALSE	glyceraldehyde-3-phosphate dehydrogenase-like	334	1362	1	protein_coding	XP_021417684.1	gi|929242580|ref|XP_013997294.1|	100	334	0	0	1	334	1	334	0	687	XP_021417684.1glyceraldehyde-3-phosphatedehydrogenase-like[Oncorhynchusmykiss]	XP_021417684.1glyceraldehyde-3-phosphatedehydrogenase-like[Oncorhynchusmykiss]	15	2	2		1	15	2	2	14	13	14	15	12	15	12	12	12	13	15	2	1	2	2	2
XP_021417708.1	gene31075:100196246	NM_001141275.1	NP_001134747.1	tpmt	FALSE	FALSE	Probable thiopurine S-methyltransferase	286	1095	1	protein_coding	XP_021417708.1	gi|929241998|ref|XP_013996986.1|	97.7	261	6	0	1	261	1	261	2e-152	537	XP_021417708.1probablethiopurineS-methyltransferaseisoformX2[Oncorhynchusmykiss];XP_021417707.1probablethiopurineS-methyltransferaseisoformX1[Oncorhynchusmykiss];XP_021416287.1probablethiopurineS-methyltransferase[Oncorhynchusmykiss];XP_021449982.1probablethiopurineS-methyltransferase,partial[Oncorhynchusmykiss];XP_021447892.1probablethiopurineS-methyltransferase,partial[Oncorhynchusmykiss]	XP_021417708.1probablethiopurineS-methyltransferaseisoformX2[Oncorhynchusmykiss];XP_021417707.1probablethiopurineS-methyltransferaseisoformX1[Oncorhynchusmykiss];XP_021416287.1probablethiopurineS-methyltransferase[Oncorhynchusmykiss];XP_021449982.1probablethiopurineS-methyltransferase,partial[Oncorhynchusmykiss]	5;5;5;4;1	5;5;5;4;1	5;5;5;4;1	;;;	5	5	5	5	3	3	4	3	4	5	2	3	3	2	4	3	3	4	3	4
XP_021417717.1	gene31116:106570014	XM_014141874.1	XP_013997349.1	LOC106570014	FALSE	FALSE	adenylate kinase 2, mitochondrial-like	244	966	1	protein_coding	XP_021417717.1	gi|929242681|ref|XP_013997350.1|	98.73	237	3	0	1	237	1	237	1e-135	481	XP_021417717.1adenylatekinase2,mitochondrial-likeisoformX2[Oncorhynchusmykiss];XP_021417716.1adenylatekinase2,mitochondrial-likeisoformX1[Oncorhynchusmykiss];XP_021417715.1adenylatekinase2,mitochondrial-likeisoformX1[Oncorhynchusmykiss]	XP_021417717.1adenylatekinase2,mitochondrial-likeisoformX2[Oncorhynchusmykiss];XP_021417716.1adenylatekinase2,mitochondrial-likeisoformX1[Oncorhynchusmykiss];XP_021417715.1adenylatekinase2,mitochondrial-likeisoformX1[Oncorhynchusmykiss]	6;5;5	6;5;5	2;1;1	;;	3	6	6	2	5	6	5	6	6	5	6	6	6	6	5	5	6	5	6	6
XP_021417723.1	gene31091:106570036	XM_014141946.1	XP_013997421.1	psmb2	FALSE	FALSE	proteasome subunit beta 2	208	858	1	protein_coding	XP_021417723.1	gi|929242815|ref|XP_013997421.1|	97.6	208	5	0	1	208	1	208	2e-116	417	XP_021417723.1proteasomesubunitbetatype-2-like[Oncorhynchusmykiss]	XP_021417723.1proteasomesubunitbetatype-2-like[Oncorhynchusmykiss]	6	6	6		1	6	6	6	6	6	5	4	5	5	5	4	4	5	5	6	6	5	4	5
XP_021417727.1	gene35088:106573943	XM_014149418.1	XP_014004893.1	dbt	FALSE	FALSE	dihydrolipoamide branched chain transacylase E2	500	2809	1	protein_coding	XP_021417727.1	gi|929257068|ref|XP_014004893.1|	95.6	500	17	1	1	495	1	500	0	985	XP_021417727.1lipoamideacyltransferasecomponentofbranched-chainalpha-ketoaciddehydrogenasecomplex,mitochondrial-like[Oncorhynchusmykiss]	XP_021417727.1lipoamideacyltransferasecomponentofbranched-chainalpha-ketoaciddehydrogenasecomplex,mitochondrial-like[Oncorhynchusmykiss]	5	5	5		1	5	5	5	4	5	5	5	5	5	4	4	4	5	5	4	5	5	5	5
XP_021417728.1	gene31101:106570028	XM_014141919.1	XP_013997394.1	LOC106570028	FALSE	FALSE	60S ribosomal protein L11	187	647	1	protein_coding	XP_021417728.1	gi|929242765|ref|XP_013997395.1|	99.44	178	1	0	1	178	1	178	9e-101	364	XP_021417728.160SribosomalproteinL11-like[Oncorhynchusmykiss];XP_021426217.160SribosomalproteinL11isoformX1[Oncorhynchusmykiss]	XP_021417728.160SribosomalproteinL11-like[Oncorhynchusmykiss];XP_021426217.160SribosomalproteinL11isoformX1[Oncorhynchusmykiss]	6;6	6;6	6;6	;	2	6	6	6	6	5	6	6	4	6	5	5	6	6	5	6	5	6	6	4
XP_021417729.1	gene4310:106583351	XM_014167455.1	XP_014022930.1	LOC106583351	FALSE	FALSE	triosephosphate isomerase B-like	247	1367	1	protein_coding	XP_021417729.1	gi|929066430|ref|XP_014022930.1|	99.56	228	1	0	5	232	20	247	3e-130	462	XP_021417729.1triosephosphateisomeraseB-like[Oncorhynchusmykiss]	XP_021417729.1triosephosphateisomeraseB-like[Oncorhynchusmykiss]	12	2	2		1	12	2	2	10	11	11	11	11	12	11	11	11	10	11	0	1	1	1	1
XP_021417740.1	gene31924:100195988	NM_001141017.2	NP_001134489.1	uk114	FALSE	TRUE	Ribonuclease UK114	135	722	1	protein_coding	XP_021417740.1	gi|213511298|ref|NP_001134489.1|	66.33	98	12	2	1	77	1	98	3e-27	118	XP_021417740.1ribonucleaseUK114-like[Oncorhynchusmykiss]	XP_021417740.1ribonucleaseUK114-like[Oncorhynchusmykiss]	2	2	2		1	2	2	2	2	2	2	2	2	2	2	2	2	2	2	2	2	2	2	2
XP_021417839.1	gene11730:100196792	XM_014200180.1	XP_014055655.1	ubp5	FALSE	FALSE	Ubiquitin carboxyl-terminal hydrolase 5	853	3687	1	protein_coding	XP_021417839.1	gi|929089881|ref|XP_014055656.1|	99.28	834	6	0	1	834	1	834	0	1727	XP_021417839.1ubiquitincarboxyl-terminalhydrolase5-likeisoformX3[Oncorhynchusmykiss];XP_021417836.1ubiquitincarboxyl-terminalhydrolase5-likeisoformX2[Oncorhynchusmykiss];XP_021417831.1ubiquitincarboxyl-terminalhydrolase5-likeisoformX1[Oncorhynchusmykiss]	XP_021417839.1ubiquitincarboxyl-terminalhydrolase5-likeisoformX3[Oncorhynchusmykiss];XP_021417836.1ubiquitincarboxyl-terminalhydrolase5-likeisoformX2[Oncorhynchusmykiss];XP_021417831.1ubiquitincarboxyl-terminalhydrolase5-likeisoformX1[Oncorhynchusmykiss]	14;14;14	14;14;14	4;4;4	;;	3	14	14	4	14	12	10	14	10	14	12	10	11	11	14	14	12	10	14	10
XP_021417863.1	gene51817:106590292	XM_014181141.1	XP_014036616.1	LOC106590292	FALSE	FALSE	leukocyte elastase inhibitor-like	377	1726	1	protein_coding	XP_021417863.1	gi|929317501|ref|XP_014036616.1|	87.83	411	15	2	1	411	1	376	0	699	XP_021417863.1leukocyteelastaseinhibitorisoformX1[Oncorhynchusmykiss];XP_021475737.1leukocyteelastaseinhibitor-like[Oncorhynchusmykiss]	XP_021417863.1leukocyteelastaseinhibitorisoformX1[Oncorhynchusmykiss]	3;1	3;1	3;1		2	3	3	3	2	3	1	3	1	2	1	1	1	1	3	2	3	1	3	1
XP_021417877.1	gene11726:106605088	XM_014200382.1	XP_014055857.1	LOC106605088	FALSE	FALSE	C-type lectin domain family 4 member E-like	254	1751	1	protein_coding	XP_021417877.1	gi|929090257|ref|XP_014055857.1|	97.24	254	7	0	1	254	1	254	1e-146	518	XP_021417877.1C-typelectindomainfamily4memberE-like[Oncorhynchusmykiss]	XP_021417877.1C-typelectindomainfamily4memberE-like[Oncorhynchusmykiss]	10	10	10		1	10	10	10	9	9	7	8	9	10	4	5	5	4	5	9	9	7	8	9
XP_021417883.1	gene51863:106590254	XM_014181062.1	XP_014036537.1	LOC106590254	FALSE	FALSE	programmed cell death protein 6-like	227	1241	1	protein_coding	XP_021417883.1	gi|929317350|ref|XP_014036537.1|	92.46	199	3	2	1	190	32	227	2e-101	366	XP_021417883.1programmedcelldeath6isoformX1[Oncorhynchusmykiss]	XP_021417883.1programmedcelldeath6isoformX1[Oncorhynchusmykiss]	2	2	2		1	2	2	2	1	2	1	1	1	1	2	2	2	2	1	1	2	1	1	1
XP_021417884.1	gene52077:100195983	NM_001141012.1	NP_001134484.1	commd3	FALSE	FALSE	COMM domain containing 3	196	1121	1	protein_coding	XP_021417884.1	gi|213515248|ref|NP_001134484.1|	93.53	201	8	1	1	201	1	196	8e-107	384	XP_021417884.1COMMdomain-containingprotein3isoformX1[Oncorhynchusmykiss]	XP_021417884.1COMMdomain-containingprotein3isoformX1[Oncorhynchusmykiss]	2	2	2		1	2	2	2	1	2	1	2	1	0	0	1	2	1	0	1	2	1	2	1
XP_021417887.1	gene52206:106590668	XM_014181823.1	XP_014037298.1	LOC106590668	FALSE	FALSE	60S ribosomal protein L7-like	245	811	1	protein_coding	XP_021417887.1	gi|929318777|ref|XP_014037297.1|	98.75	240	3	0	3	242	6	245	1e-136	484	XP_021417887.160SribosomalproteinL7isoformX1[Oncorhynchusmykiss];XP_021417886.160SribosomalproteinL7isoformX1[Oncorhynchusmykiss];XP_021417888.160SribosomalproteinL7isoformX2[Oncorhynchusmykiss]	XP_021417887.160SribosomalproteinL7isoformX1[Oncorhynchusmykiss];XP_021417886.160SribosomalproteinL7isoformX1[Oncorhynchusmykiss];XP_021417888.160SribosomalproteinL7isoformX2[Oncorhynchusmykiss]	11;11;11	11;11;11	5;5;5	;;	3	11	11	5	11	10	10	11	9	10	10	10	10	9	10	11	10	10	11	9
XP_021417904.1	gene52226:100194801	NM_001139830.1	NP_001133302.1	glyg	FALSE	FALSE	Glycogenin-1	332	3588	1	protein_coding	XP_021417904.1	gi|213513790|ref|NP_001133302.1|	93.37	332	22	0	1	332	1	332	0	658	XP_021417904.1glycogenin-1-likeisoformX2[Oncorhynchusmykiss];XP_021417903.1glycogenin-1-likeisoformX1[Oncorhynchusmykiss];XP_021466746.1glycogenin-1-like[Oncorhynchusmykiss];XP_021464299.1glycogenin-1-like[Oncorhynchusmykiss]	XP_021417904.1glycogenin-1-likeisoformX2[Oncorhynchusmykiss];XP_021417903.1glycogenin-1-likeisoformX1[Oncorhynchusmykiss]	3;3;1;1	3;3;1;1	2;2;0;0	;	4	3	3	2	3	2	3	1	1	3	1	0	0	0	2	3	2	3	1	1
XP_021417935.1	gene39581:106578486	XM_014157342.1	XP_014012817.1	LOC106578486	FALSE	FALSE	ATP-binding cassette sub-family D member 3-like	660	3417	1	protein_coding	XP_021417935.1	gi|929272339|ref|XP_014012817.1|	92.13	661	51	1	1	661	1	660	0	1255	XP_021417935.1ATP-bindingcassettesub-familyDmember3-like[Oncorhynchusmykiss]	XP_021417935.1ATP-bindingcassettesub-familyDmember3-like[Oncorhynchusmykiss]	12	4	2		1	12	4	2	11	11	12	11	10	11	10	9	10	9	11	4	4	4	4	4
XP_021417975.1	gene52146:106590610	XM_014181736.1	XP_014037211.1	LOC106590610	FALSE	FALSE	T-complex protein 1 subunit epsilon-like	541	2057	1	protein_coding	XP_021417975.1	gi|929318618|ref|XP_014037211.1|	99.82	541	1	0	1	541	1	541	0	1111	XP_021417975.1T-complexprotein1subunitepsilon-like[Oncorhynchusmykiss]	XP_021417975.1T-complexprotein1subunitepsilon-like[Oncorhynchusmykiss]	15	2	2		1	15	2	2	14	12	12	13	12	13	11	9	10	13	10	2	2	1	2	1
XP_021417979.1	gene52136:106590602	XM_014181723.1	XP_014037198.1	hgd	FALSE	FALSE	homogentisate 1,2-dioxygenase	443	1834	1	protein_coding	XP_021417979.1	gi|929318591|ref|XP_014037198.1|	97.97	443	9	0	1	443	1	443	0	919	XP_021417979.1homogentisate1,2-dioxygenase[Oncorhynchusmykiss]	XP_021417979.1homogentisate1,2-dioxygenase[Oncorhynchusmykiss]	30	30	30		1	30	30	30	30	27	30	29	27	30	26	28	25	29	28	30	27	30	29	27
XP_021417985.1	gene52128:106590593	XM_014181708.1	XP_014037183.1	cmbl	FALSE	TRUE	carboxymethylenebutenolidase homolog (Pseudomonas)	256	1697	1	protein_coding	XP_021417985.1	gi|929318562|ref|XP_014037183.1|	97.56	246	6	0	1	246	11	256	7e-144	508	XP_021417985.1carboxymethylenebutenolidasehomolog[Oncorhynchusmykiss];XP_021417984.1carboxymethylenebutenolidasehomolog[Oncorhynchusmykiss]	XP_021417985.1carboxymethylenebutenolidasehomolog[Oncorhynchusmykiss];XP_021417984.1carboxymethylenebutenolidasehomolog[Oncorhynchusmykiss]	8;8	8;8	8;8	;	2	8	8	8	7	8	8	8	6	8	5	8	8	7	8	7	8	8	8	6
XP_021417995.1	gene52114:100196554	NM_001141583.1	NP_001135055.1	dap1	FALSE	FALSE	Death-associated protein 1	106	1358	1	protein_coding	XP_021417995.1	gi|213511362|ref|NP_001135055.1|	100	106	0	0	1	106	1	106	1e-54	209	XP_021417995.1death-associatedprotein1[Oncorhynchusmykiss]	XP_021417995.1death-associatedprotein1[Oncorhynchusmykiss]	2	2	2		1	2	2	2	2	2	2	2	2	2	2	2	2	2	2	2	2	2	2	2
XP_021418012.1	gene52098:106590560	XM_014181670.1	XP_014037145.1	LOC106590560	FALSE	FALSE	protein disulfide-isomerase A4-like	639	2536	1	protein_coding	XP_021418012.1	gi|929318491|ref|XP_014037145.1|	96.71	639	21	0	1	639	1	639	0	1246	XP_021418012.1proteindisulfide-isomeraseA4-like[Oncorhynchusmykiss]	XP_021418012.1proteindisulfide-isomeraseA4-like[Oncorhynchusmykiss]	27	16	16		1	27	16	16	26	26	25	25	25	26	26	25	27	24	24	15	15	15	15	14
XP_021418021.1	gene52065:106590529	XM_014181632.1	XP_014037107.1	LOC106590529	FALSE	FALSE	lipocalin-like	181	857	1	protein_coding	XP_021418021.1	gi|929318411|ref|XP_014037107.1|	92.82	181	13	0	1	181	1	181	3e-98	355	XP_021418021.1lipocalin-like[Oncorhynchusmykiss];XP_021418022.1lipocalin[Oncorhynchusmykiss];XP_021476060.1lipocalin-like[Oncorhynchusmykiss]	XP_021418021.1lipocalin-like[Oncorhynchusmykiss];XP_021418022.1lipocalin[Oncorhynchusmykiss];XP_021476060.1lipocalin-like[Oncorhynchusmykiss]	2;1;1	2;1;1	2;1;1	;;	3	2	2	2	1	1	0	0	0	2	0	2	0	0	2	1	1	0	0	0
XP_021418024.1	gene52061:100196340	NM_001141369.1	NP_001134841.1	rl22l	FALSE	FALSE	Ribosomal protein L22-like 1	129	577	1	protein_coding	XP_021418024.1	gi|213514434|ref|NP_001134841.1|	99.22	129	1	0	1	129	1	129	2e-69	258	XP_021418024.160SribosomalproteinL22-like1[Oncorhynchusmykiss]	XP_021418024.160SribosomalproteinL22-like1[Oncorhynchusmykiss]	3	3	3		1	3	3	3	2	2	3	3	3	2	2	2	2	3	3	2	2	3	3	3
XP_021418053.1	gene52032:106590489	XM_014181576.1	XP_014037051.1	LOC106590489	FALSE	FALSE	eukaryotic translation initiation factor 2 subunit 3-like	475	2160	1	protein_coding	XP_021418053.1	gi|929318306|ref|XP_014037051.1|	100	475	0	0	1	475	1	475	0	968	XP_021418053.1eukaryotictranslationinitiationfactor2subunit3-like[Oncorhynchusmykiss]	XP_021418053.1eukaryotictranslationinitiationfactor2subunit3-like[Oncorhynchusmykiss]	13	1	1		1	13	1	1	13	13	13	13	13	13	13	11	13	13	13	1	1	1	1	1
XP_021418055.1	gene52029:106590492	XM_014181579.1	XP_014037054.1	LOC106590492	FALSE	FALSE	myosin-11-like	495	2453	1	protein_coding	XP_021418055.1	gi|929318314|ref|XP_014037054.1|	94.49	399	21	1	15	412	97	495	0	714	XP_021418055.1golginIMH1-like[Oncorhynchusmykiss]	XP_021418055.1golginIMH1-like[Oncorhynchusmykiss]	2	2	2		1	2	2	2	1	1	1	1	1	1	2	2	1	1	2	1	1	1	1	1
XP_021418084.1	gene40636:106579539	XM_014159540.1	XP_014015015.1	abhd10	FALSE	FALSE	abhydrolase domain containing 10	289	1440	1	protein_coding	XP_021418084.1	gi|929276496|ref|XP_014015015.1|	89.62	289	30	0	1	289	1	289	2e-153	540	XP_021418084.1mycophenolicacidacyl-glucuronideesterase,mitochondrial-like[Oncorhynchusmykiss]	XP_021418084.1mycophenolicacidacyl-glucuronideesterase,mitochondrial-like[Oncorhynchusmykiss]	4	4	2		1	4	4	2	3	4	3	4	4	4	2	4	3	4	4	3	4	3	4	4
XP_021418238.1	gene51912:106590366	XM_014181307.1	XP_014036782.1	LOC106590366	FALSE	FALSE	aspartyl/asparaginyl beta-hydroxylase-like	935	5322	1	protein_coding	XP_021418238.1	gi|929317834|ref|XP_014036796.1|	89.52	687	25	3	22	682	30	695	0	1174	XP_021418238.1aspartyl/asparaginylbeta-hydroxylase-likeisoformX33[Oncorhynchusmykiss];XP_021418237.1aspartyl/asparaginylbeta-hydroxylase-likeisoformX32[Oncorhynchusmykiss];XP_021418235.1aspartyl/asparaginylbeta-hydroxylase-likeisoformX31[Oncorhynchusmykiss];XP_021418234.1aspartyl/asparaginylbeta-hydroxylase-likeisoformX30[Oncorhynchusmykiss];XP_021418233.1aspartyl/asparaginylbeta-hydroxylase-like…	XP_021418238.1aspartyl/asparaginylbeta-hydroxylase-likeisoformX33[Oncorhynchusmykiss];XP_021418237.1aspartyl/asparaginylbeta-hydroxylase-likeisoformX32[Oncorhynchusmykiss];XP_021418235.1aspartyl/asparaginylbeta-hydroxylase-likeisoformX31[Oncorhynchusmykiss];XP_021418234.1aspartyl/asparaginylbeta-hydroxylase-likeisoformX30[Oncorhynchusmykiss];XP_021418233.1aspartyl/asparaginylbeta-hydroxylase-like…	11;11;11;11;11;11;11;11;11;11;11;11;11;11;11;11;11;11;11;11;11;11;11;11;11;11;11;11;11;11;11;11;11	1;1;1;1;1;1;1;1;1;1;1;1;1;1;1;1;1;1;1;1;1;1;1;1;1;1;1;1;1;1;1;1;1	1;1;1;1;1;1;1;1;1;1;1;1;1;1;1;1;1;1;1;1;1;1;1;1;1;1;1;1;1;1;1;1;1	;;;;;;;;;;;;;;;;;;;;;;;;;;;;;;;;	33	11	1	1	11	10	11	11	11	10	10	10	10	10	10	1	1	1	1	1
XP_021418251.1	gene51906:106590376	XM_014181342.1	XP_014036817.1	xylb	FALSE	FALSE	xylulokinase homolog (H. influenzae)	532	2222	1	protein_coding	XP_021418251.1	gi|929317872|ref|XP_014036817.1|	97.93	532	11	0	1	532	1	532	0	1081	XP_021418251.1xylulosekinase[Oncorhynchusmykiss]	XP_021418251.1xylulosekinase[Oncorhynchusmykiss]	8	8	8		1	8	8	8	5	6	5	5	5	7	5	4	6	5	5	5	6	5	5	5
XP_021418281.1	gene51892:106590342	XM_014181244.1	XP_014036719.1	LOC106590342	FALSE	FALSE	band 4.1-like protein 3	1183	5053	1	protein_coding	XP_021418281.1	gi|929317716|ref|XP_014036731.1|	96.1	1129	40	2	8	1136	1	1125	0	2111	XP_021418281.1band4.1-likeprotein3isoformX5[Oncorhynchusmykiss];XP_021418282.1protein4.1-likeisoformX6[Oncorhynchusmykiss];XP_021418280.1band4.1-likeprotein3isoformX4[Oncorhynchusmykiss];XP_021418279.1band4.1-likeprotein3isoformX3[Oncorhynchusmykiss];XP_021418278.1band4.1-likeprotein3isoformX2[Oncorhynchusmykiss];XP_021418277.1band4.1-likeprotein3isoformX2[Oncorhynchusmykiss];XP_021418276.1band4.…	XP_021418281.1band4.1-likeprotein3isoformX5[Oncorhynchusmykiss];XP_021418282.1protein4.1-likeisoformX6[Oncorhynchusmykiss];XP_021418280.1band4.1-likeprotein3isoformX4[Oncorhynchusmykiss];XP_021418279.1band4.1-likeprotein3isoformX3[Oncorhynchusmykiss];XP_021418278.1band4.1-likeprotein3isoformX2[Oncorhynchusmykiss];XP_021418277.1band4.1-likeprotein3isoformX2[Oncorhynchusmykiss];XP_021418276.1band4.…	4;4;4;4;4;4;4;4;3;2;2;1;1;1;1;1;1;1;1;1;1;1;1;1;1;1	4;4;4;4;4;4;4;4;3;2;2;1;1;1;1;1;1;1;1;1;1;1;1;1;1;1	3;3;3;3;3;3;3;3;2;2;2;1;1;1;1;1;1;1;1;1;1;1;1;1;1;1	;;;;;;;;;;	26	4	4	3	2	1	2	2	2	2	2	1	4	1	2	2	1	2	2	2
XP_021418328.1	gene51868:106590248	XM_014181051.1	XP_014036526.1	eef1e1	FALSE	FALSE	eukaryotic translation elongation factor 1 epsilon 1	173	2192	1	protein_coding	XP_021418328.1	gi|929317330|ref|XP_014036526.1|	80.35	173	2	1	1	141	1	173	4e-73	271	XP_021418328.1eukaryotictranslationelongationfactor1epsilon-1isoformX2[Oncorhynchusmykiss];XP_021418327.1eukaryotictranslationelongationfactor1epsilon-1isoformX1[Oncorhynchusmykiss];XP_021475796.1eukaryotictranslationelongationfactor1epsilon-1-likeisoformX2[Oncorhynchusmykiss];XP_021475795.1eukaryotictranslationelongationfactor1epsilon-1-likeisoformX1[Oncorhynchusmykiss]	XP_021418328.1eukaryotictranslationelongationfactor1epsilon-1isoformX2[Oncorhynchusmykiss];XP_021418327.1eukaryotictranslationelongationfactor1epsilon-1isoformX1[Oncorhynchusmykiss]	3;3;1;1	3;3;1;1	3;3;1;1	;	4	3	3	3	3	3	2	3	3	3	3	3	3	3	3	3	3	2	3	3
XP_021418332.1	gene51866:106590251	XM_014181054.1	XP_014036529.1	LOC106590251	FALSE	FALSE	thioredoxin domain-containing protein 5-like	408	3016	1	protein_coding	XP_021418332.1	gi|929317336|ref|XP_014036529.1|	96.32	408	15	0	1	408	1	408	0	826	XP_021418332.1thioredoxindomain-containingprotein5[Oncorhynchusmykiss]	XP_021418332.1thioredoxindomain-containingprotein5[Oncorhynchusmykiss]	5	3	3		1	5	3	3	4	4	4	4	4	5	1	4	4	4	2	3	3	3	2	3
XP_021418339.1	gene51861:106590255	XM_014181064.1	XP_014036539.1	ipo4	FALSE	FALSE	importin 4	1086	3966	1	protein_coding	XP_021418339.1	gi|929317354|ref|XP_014036539.1|	99.45	1087	5	1	1	1087	1	1086	0	2128	XP_021418339.1importin-4[Oncorhynchusmykiss];XP_021475791.1importin-4-like[Oncorhynchusmykiss]	XP_021418339.1importin-4[Oncorhynchusmykiss]	6;2	6;2	6;2		2	6	6	6	4	5	5	5	4	5	4	4	3	4	4	4	5	5	5	4
XP_021418342.1	gene51859:106590257	XM_014181072.1	XP_014036547.1	tm9sf1	FALSE	FALSE	transmembrane 9 superfamily member 1	610	2433	1	protein_coding	XP_021418342.1	gi|929317356|ref|XP_014036540.1|	99.18	610	5	0	1	610	1	610	0	1248	XP_021418342.1transmembrane9superfamilymember1[Oncorhynchusmykiss];XP_021418341.1transmembrane9superfamilymember1[Oncorhynchusmykiss];XP_021418340.1transmembrane9superfamilymember1[Oncorhynchusmykiss]	XP_021418342.1transmembrane9superfamilymember1[Oncorhynchusmykiss];XP_021418341.1transmembrane9superfamilymember1[Oncorhynchusmykiss];XP_021418340.1transmembrane9superfamilymember1[Oncorhynchusmykiss]	2;2;2	2;2;2	2;2;2	;;	3	2	2	2	2	2	2	2	2	2	2	1	1	0	2	2	2	2	2	2
XP_021418345.1	gene51857:106590260	XM_014181075.1	XP_014036550.1	pck2	FALSE	FALSE	phosphoenolpyruvate carboxykinase 2 (mitochondrial)	651	2702	1	protein_coding	XP_021418345.1	gi|929317376|ref|XP_014036551.1|	98.9	638	7	0	1	638	1	638	0	1300	XP_021418345.1phosphoenolpyruvatecarboxykinase[GTP],mitochondrial[Oncorhynchusmykiss];XP_021424115.1phosphoenolpyruvatecarboxykinase,cytosolic[GTP][Oncorhynchusmykiss]	XP_021418345.1phosphoenolpyruvatecarboxykinase[GTP],mitochondrial[Oncorhynchusmykiss]	29;2	29;2	29;2		2	29	29	29	29	26	26	26	25	29	26	27	26	26	27	29	26	26	26	25
XP_021418346.1	gene51856:106590261	XM_014181079.1	XP_014036554.1	psme1	FALSE	FALSE	proteasome activator subunit 1	250	1295	1	protein_coding	XP_021418346.1	gi|929317380|ref|XP_014036554.1|	98.8	250	3	0	1	250	1	250	4e-143	506	XP_021418346.1proteasomeactivatorcomplexsubunit1[Oncorhynchusmykiss]	XP_021418346.1proteasomeactivatorcomplexsubunit1[Oncorhynchusmykiss]	11	4	4		1	11	4	4	11	11	10	10	10	10	8	11	9	11	11	4	4	4	4	4
XP_021418426.1	gene51804:106590305	XM_014181179.1	XP_014036654.1	acbd5	FALSE	FALSE	acyl-CoA binding domain containing 5	510	4053	1	protein_coding	XP_021418426.1	gi|929317573|ref|XP_014036655.1|	95.62	502	18	2	1	501	1	499	0	922	XP_021418426.1acyl-CoA-bindingdomain-containingprotein5[Oncorhynchusmykiss]	XP_021418426.1acyl-CoA-bindingdomain-containingprotein5[Oncorhynchusmykiss]	4	4	4		1	4	4	4	4	4	4	4	4	4	4	4	4	4	4	4	4	4	4	4
XP_021418453.1	gene51795:100196625	NM_001141654.1	NP_001135126.1	psme2	FALSE	FALSE	proteasome activator subunit 2	244	1206	1	protein_coding	XP_021418453.1	gi|213513362|ref|NP_001135126.1|	95.9	244	8	1	1	242	1	244	3e-118	423	XP_021418453.1proteasomeactivatorcomplexsubunit2-like[Oncorhynchusmykiss]	XP_021418453.1proteasomeactivatorcomplexsubunit2-like[Oncorhynchusmykiss]	6	6	1		1	6	6	1	6	6	5	6	5	6	6	6	6	6	6	6	6	5	6	5
XP_021418468.1	gene51782:106590226	XM_014181007.1	XP_014036482.1	LOC106590226	FALSE	FALSE	annexin A13-like	317	2666	1	protein_coding	XP_021418468.1	gi|929317256|ref|XP_014036483.1|	99.05	316	3	0	1	316	1	316	0	641	XP_021418468.1annexinA13-like[Oncorhynchusmykiss];XP_021418467.1annexinA13-like[Oncorhynchusmykiss];XP_021445713.1annexinA13-like[Oncorhynchusmykiss];XP_021445712.1annexinA13-like[Oncorhynchusmykiss]	XP_021418468.1annexinA13-like[Oncorhynchusmykiss]	11;4;1;1	11;4;1;1	11;4;1;1		4	11	11	11	11	11	11	10	10	10	10	11	10	9	11	11	11	11	10	10
XP_021418483.1	gene51769:106590215	XM_014180984.1	XP_014036459.1	sdr16c5	FALSE	FALSE	short chain dehydrogenase/reductase family 16C, member 5	305	1902	1	protein_coding	XP_021418483.1	gi|929317212|ref|XP_014036459.1|	98.36	305	5	0	1	305	1	305	2e-177	620	XP_021418483.1epidermalretinoldehydrogenase2[Oncorhynchusmykiss];XP_021418482.1epidermalretinoldehydrogenase2[Oncorhynchusmykiss]	XP_021418483.1epidermalretinoldehydrogenase2[Oncorhynchusmykiss];XP_021418482.1epidermalretinoldehydrogenase2[Oncorhynchusmykiss]	14;14	14;14	14;14	;	2	14	14	14	14	12	14	14	13	14	13	14	13	13	14	14	12	14	14	13
XP_021418517.1	gene51744:106590193	XM_014180931.1	XP_014036406.1	tmx3	FALSE	FALSE	thioredoxin-related transmembrane protein 3	453	3541	1	protein_coding	XP_021418517.1	gi|929317113|ref|XP_014036406.1|	96.26	454	15	2	7	459	1	453	0	846	XP_021418517.1proteindisulfide-isomeraseTMX3[Oncorhynchusmykiss]	XP_021418517.1proteindisulfide-isomeraseTMX3[Oncorhynchusmykiss]	2	2	2		1	2	2	2	2	2	2	2	2	2	2	2	2	2	2	2	2	2	2	2
XP_021418527.1	gene51736:106590187	XM_014180917.1	XP_014036392.1	LOC106590187	FALSE	FALSE	cytochrome P450 2F3-like	491	2706	1	protein_coding	XP_021418527.1	gi|929317087|ref|XP_014036392.1|	95.93	491	20	0	1	491	1	491	0	943	XP_021418527.1cytochromeP4502F3-like[Oncorhynchusmykiss]	XP_021418527.1cytochromeP4502F3-like[Oncorhynchusmykiss]	15	15	10		1	15	15	10	14	13	13	15	13	15	12	12	11	13	14	14	13	13	15	13
XP_021418534.1	gene51735:106590186	XM_014180908.1	XP_014036383.1	LOC106590186	FALSE	FALSE	dnaJ homolog subfamily C member 13-like	2308	8193	1	protein_coding	XP_021418534.1	gi|929317070|ref|XP_014036383.1|	99.47	2268	12	0	1	2268	41	2308	0	4710	XP_021418534.1dnaJhomologsubfamilyCmember13-likeisoformX7[Oncorhynchusmykiss];XP_021418533.1dnaJhomologsubfamilyCmember13-likeisoformX6[Oncorhynchusmykiss];XP_021418532.1dnaJhomologsubfamilyCmember13-likeisoformX5[Oncorhynchusmykiss];XP_021418531.1dnaJhomologsubfamilyCmember13-likeisoformX4[Oncorhynchusmykiss];XP_021418530.1dnaJhomologsubfamilyCmember13-likeisoformX3[Oncorhynchusmykiss];XP_021418…	XP_021418534.1dnaJhomologsubfamilyCmember13-likeisoformX7[Oncorhynchusmykiss];XP_021418533.1dnaJhomologsubfamilyCmember13-likeisoformX6[Oncorhynchusmykiss];XP_021418532.1dnaJhomologsubfamilyCmember13-likeisoformX5[Oncorhynchusmykiss];XP_021418531.1dnaJhomologsubfamilyCmember13-likeisoformX4[Oncorhynchusmykiss];XP_021418530.1dnaJhomologsubfamilyCmember13-likeisoformX3[Oncorhynchusmykiss];XP_021418…	6;6;6;6;6;6;6;4;4;4;4;4;4	6;6;6;6;6;6;6;4;4;4;4;4;4	6;6;6;6;6;6;6;4;4;4;4;4;4	;;;;;;;;;;;;	13	6	6	6	6	6	5	5	6	4	6	6	6	6	6	6	6	5	5	6
XP_021418540.1	gene51732:100380682	XM_014180902.1	XP_014036377.1	LOC100380682	FALSE	FALSE	protein CDV3 homolog	235	2927	1	protein_coding	XP_021418540.1	gi|929317060|ref|XP_014036377.1|	99.15	235	2	0	1	235	1	235	3e-131	466	XP_021418540.1proteinCDV3homologisoformX1[Oncorhynchusmykiss];XP_021418541.1proteinCDV3homologisoformX2[Oncorhynchusmykiss];XP_021476465.1proteinCDV3homologisoformX1[Oncorhynchusmykiss];XP_021476466.1proteinCDV3homologisoformX2[Oncorhynchusmykiss]	XP_021418540.1proteinCDV3homologisoformX1[Oncorhynchusmykiss];XP_021418541.1proteinCDV3homologisoformX2[Oncorhynchusmykiss];XP_021476465.1proteinCDV3homologisoformX1[Oncorhynchusmykiss]	4;3;2;1	4;3;2;1	4;3;2;1	;;	4	4	4	4	4	4	4	4	4	4	4	4	4	3	4	4	4	4	4	4
XP_021418554.1	gene39802:106578667	XM_014157733.1	XP_014013208.1	LOC106578667	FALSE	FALSE	poly(U)-binding-splicing factor PUF60-like	555	2141	1	protein_coding	XP_021418554.1	gi|929273090|ref|XP_014013213.1|	97.28	515	11	1	1	515	13	524	0	991	XP_021418554.1poly(U)-binding-splicingfactorPUF60-likeisoformX6[Oncorhynchusmykiss];XP_021418553.1poly(U)-binding-splicingfactorPUF60-likeisoformX5[Oncorhynchusmykiss];XP_021418552.1poly(U)-binding-splicingfactorPUF60-likeisoformX4[Oncorhynchusmykiss];XP_021418551.1poly(U)-binding-splicingfactorPUF60-likeisoformX3[Oncorhynchusmykiss];XP_021418550.1poly(U)-binding-splicingfactorPUF60-likeisoformX2…	XP_021418554.1poly(U)-binding-splicingfactorPUF60-likeisoformX6[Oncorhynchusmykiss];XP_021418553.1poly(U)-binding-splicingfactorPUF60-likeisoformX5[Oncorhynchusmykiss];XP_021418552.1poly(U)-binding-splicingfactorPUF60-likeisoformX4[Oncorhynchusmykiss];XP_021418551.1poly(U)-binding-splicingfactorPUF60-likeisoformX3[Oncorhynchusmykiss];XP_021418550.1poly(U)-binding-splicingfactorPUF60-likeisoformX2…	6;6;6;6;6;6;4;4;4;4;4;3;3;3	6;6;6;6;6;6;4;4;4;4;4;3;3;3	6;6;6;6;6;6;4;4;4;4;4;3;3;3	;;;;;;;;;;;;;	14	6	6	6	6	6	6	5	6	5	4	6	4	5	4	6	6	6	5	6
XP_021418624.1	gene51693:106590146	XM_014180790.1	XP_014036265.1	LOC106590146	FALSE	FALSE	myosin regulatory light polypeptide 9	172	990	1	protein_coding	XP_021418624.1	gi|929316852|ref|XP_014036264.1|	100	172	0	0	1	172	1	172	8e-98	354	XP_021418624.1myosinregulatorylightpolypeptide9[Oncorhynchusmykiss]	XP_021418624.1myosinregulatorylightpolypeptide9[Oncorhynchusmykiss]	5	5	3		1	5	5	3	4	4	4	5	4	5	3	5	3	4	4	4	4	4	5	4
XP_021418648.1	gene51685:106590138	XM_014180763.1	XP_014036238.1	LOC106590138	FALSE	FALSE	tyrosine-protein kinase yes	546	3812	1	protein_coding	XP_021418648.1	gi|929316802|ref|XP_014036237.1|	99.45	546	3	0	1	546	1	546	0	1133	XP_021418648.1tyrosine-proteinkinaseyes[Oncorhynchusmykiss];XP_021476407.1tyrosine-proteinkinaseYes-like[Oncorhynchusmykiss];XP_021421705.1proto-oncogenetyrosine-proteinkinaseSrc-likeisoformX4[Oncorhynchusmykiss];XP_021424123.1proto-oncogenetyrosine-proteinkinaseSrc-likeisoformX2[Oncorhynchusmykiss];XP_021421704.1proto-oncogenetyrosine-proteinkinaseSrc-likeisoformX3[Oncorhynchusmykiss];XP_0214241…	XP_021418648.1tyrosine-proteinkinaseyes[Oncorhynchusmykiss];XP_021476407.1tyrosine-proteinkinaseYes-like[Oncorhynchusmykiss]	3;2;1;1;1;1;1;1;1;1	3;2;1;1;1;1;1;1;1;1	3;2;1;1;1;1;1;1;1;1	;	10	3	3	3	3	2	2	2	2	3	2	3	3	3	3	3	2	2	2	2
XP_021418673.1	gene35076:100194867	NM_001139896.1	NP_001133368.1	mepd	FALSE	FALSE	Thimet oligopeptidase	685	2607	1	protein_coding	XP_021418673.1	gi|213514384|ref|NP_001133368.1|	99.42	685	4	0	1	685	1	685	0	1421	XP_021418673.1thimetoligopeptidase-like[Oncorhynchusmykiss]	XP_021418673.1thimetoligopeptidase-like[Oncorhynchusmykiss]	18	18	7		1	18	18	7	16	13	11	15	13	17	15	16	11	15	12	16	13	11	15	13
XP_021418678.1	gene11680:106605032	XM_014200261.1	XP_014055736.1	LOC106605032	FALSE	FALSE	NADP-dependent malic enzyme-like	588	2085	1	protein_coding	XP_021418678.1	gi|929090026|ref|XP_014055736.1|	98.98	588	6	0	1	588	1	588	0	1211	XP_021418678.1NADP-dependentmalicenzyme-like[Oncorhynchusmykiss]	XP_021418678.1NADP-dependentmalicenzyme-like[Oncorhynchusmykiss]	25	25	6		1	25	25	6	24	25	24	24	24	24	20	23	22	23	25	24	25	24	24	24
XP_021418751.1	gene51632:106590089	XM_014180638.1	XP_014036113.1	LOC106590089	FALSE	FALSE	protein phosphatase 1 regulatory subunit 3G-like	280	2857	1	protein_coding	XP_021418751.1	gi|929316575|ref|XP_014036113.1|	95.36	280	13	0	1	280	1	280	2e-162	570	XP_021418751.1proteinphosphatase1regulatorysubunit3G-like[Oncorhynchusmykiss]	XP_021418751.1proteinphosphatase1regulatorysubunit3G-like[Oncorhynchusmykiss]	3	3	3		1	3	3	3	3	3	3	3	3	3	3	3	3	3	3	3	3	3	3	3
XP_021418752.1	gene51631:106590088	XM_014180637.1	XP_014036112.1	LOC106590088	FALSE	FALSE	cytochrome b5	137	1543	1	protein_coding	XP_021418752.1	gi|929316573|ref|XP_014036112.1|	95.62	137	6	0	1	137	1	137	1e-73	273	XP_021418752.1cytochromeb5-like[Oncorhynchusmykiss]	XP_021418752.1cytochromeb5-like[Oncorhynchusmykiss]	3	3	3		1	3	3	3	3	3	3	3	3	3	3	3	3	3	3	3	3	3	3	3
XP_021418758.1	gene51626:106590083	XM_014180630.1	XP_014036105.1	LOC106590083	FALSE	FALSE	enoyl-CoA delta isomerase 2, mitochondrial-like	390	2118	1	protein_coding	XP_021418758.1	gi|929316561|ref|XP_014036105.1|	98.21	390	7	0	1	390	1	390	0	799	XP_021418758.1enoyl-CoAdeltaisomerase2,mitochondrial-like[Oncorhynchusmykiss]	XP_021418758.1enoyl-CoAdeltaisomerase2,mitochondrial-like[Oncorhynchusmykiss]	7	7	5		1	7	7	5	6	5	6	6	5	6	4	5	4	4	6	6	5	6	6	5
XP_021418762.1	gene51623:106590081	XM_014180625.1	XP_014036100.1	LOC106590081	FALSE	TRUE	succinate--hydroxymethylglutarate CoA-transferase-like	449	2245	1	protein_coding	XP_021418762.1	gi|929316553|ref|XP_014036100.1|	97.89	379	8	0	1	379	71	449	0	778	XP_021418762.1succinate--hydroxymethylglutarateCoA-transferaseisoformX3[Oncorhynchusmykiss];XP_021418761.1succinate--hydroxymethylglutarateCoA-transferaseisoformX2[Oncorhynchusmykiss];XP_021418760.1succinate--hydroxymethylglutarateCoA-transferaseisoformX1[Oncorhynchusmykiss]	XP_021418762.1succinate--hydroxymethylglutarateCoA-transferaseisoformX3[Oncorhynchusmykiss];XP_021418761.1succinate--hydroxymethylglutarateCoA-transferaseisoformX2[Oncorhynchusmykiss];XP_021418760.1succinate--hydroxymethylglutarateCoA-transferaseisoformX1[Oncorhynchusmykiss]	2;2;2	2;2;2	2;2;2	;;	3	2	2	2	2	2	2	2	2	2	2	2	2	2	1	2	2	2	2	2
XP_021418799.1	gene35077:106573934	XM_014149400.1	XP_014004875.1	LOC106573934	FALSE	FALSE	small glutamine-rich tetratricopeptide repeat-containing protein alpha-like	341	1857	1	protein_coding	XP_021418799.1	gi|929257032|ref|XP_014004875.1|	93.41	349	15	1	1	349	1	341	1e-163	575	XP_021418799.1smallglutamine-richtetratricopeptiderepeat-containingproteinalpha-like[Oncorhynchusmykiss]	XP_021418799.1smallglutamine-richtetratricopeptiderepeat-containingproteinalpha-like[Oncorhynchusmykiss]	2	1	1		1	2	1	1	2	2	1	1	2	1	1	2	2	0	0	1	1	0	1	1
XP_021418803.1	gene51580:106590025	XM_014180507.1	XP_014035982.1	LOC106590025	FALSE	FALSE	integrin beta-1-like	802	2572	1	protein_coding	XP_021418803.1	gi|929316338|ref|XP_014035984.1|	98.5	798	12	0	1	798	1	798	0	1623	XP_021418803.1integrinbeta-1-likeisoformX2[Oncorhynchusmykiss];XP_021418802.1integrinbeta-1-likeisoformX1[Oncorhynchusmykiss];XP_021418801.1integrinbeta-1-likeisoformX1[Oncorhynchusmykiss];XP_021476283.1integrinbeta-1-likeisoformX4[Oncorhynchusmykiss];XP_021476281.1integrinbeta-1-likeisoformX3[Oncorhynchusmykiss];XP_021476280.1integrinbeta-1-likeisoformX2[Oncorhynchusmykiss];XP_021476279.1integri…	XP_021418803.1integrinbeta-1-likeisoformX2[Oncorhynchusmykiss];XP_021418802.1integrinbeta-1-likeisoformX1[Oncorhynchusmykiss];XP_021418801.1integrinbeta-1-likeisoformX1[Oncorhynchusmykiss];XP_021476283.1integrinbeta-1-likeisoformX4[Oncorhynchusmykiss];XP_021476281.1integrinbeta-1-likeisoformX3[Oncorhynchusmykiss];XP_021476280.1integrinbeta-1-likeisoformX2[Oncorhynchusmykiss];XP_021476279.1integri…	4;4;4;3;3;3;3	4;4;4;3;3;3;3	1;1;1;1;1;1;1	;;;;;;	7	4	4	1	3	4	4	4	3	4	4	2	4	4	3	3	4	4	4	3
XP_021418858.1	gene19362:106612348	XM_014213404.1	XP_014068879.1	LOC106612348	FALSE	FALSE	claudin-10-like	224	1162	1	protein_coding	XP_021418858.1	gi|929114897|ref|XP_014068880.1|	97.32	224	6	0	1	224	1	224	1e-117	421	XP_021418858.1claudin-10-likeisoformX2[Oncorhynchusmykiss];XP_021418857.1claudin-19-likeisoformX1[Oncorhynchusmykiss];XP_021418856.1claudin-19-likeisoformX1[Oncorhynchusmykiss];XP_021418855.1claudin-19-likeisoformX1[Oncorhynchusmykiss]	XP_021418858.1claudin-10-likeisoformX2[Oncorhynchusmykiss];XP_021418857.1claudin-19-likeisoformX1[Oncorhynchusmykiss];XP_021418856.1claudin-19-likeisoformX1[Oncorhynchusmykiss];XP_021418855.1claudin-19-likeisoformX1[Oncorhynchusmykiss]	2;2;2;2	2;2;2;2	2;2;2;2	;;;	4	2	2	2	2	2	2	2	2	2	2	2	2	2	2	2	2	2	2	2
XP_021418886.1	gene41817:100195059	NM_001140088.1	NP_001133560.1	eif2a	FALSE	FALSE	eukaryotic translation initiation factor 2A, 65kDa	581	2386	1	protein_coding	XP_021418886.1	gi|213514166|ref|NP_001133560.1|	97.93	581	12	0	1	581	1	581	0	1138	XP_021418886.1eukaryotictranslationinitiationfactor2A-like[Oncorhynchusmykiss];XP_021442952.1eukaryotictranslationinitiationfactor2A-like[Oncorhynchusmykiss]	XP_021418886.1eukaryotictranslationinitiationfactor2A-like[Oncorhynchusmykiss];XP_021442952.1eukaryotictranslationinitiationfactor2A-like[Oncorhynchusmykiss]	8;5	8;5	8;5	;	2	8	8	8	7	5	6	7	6	5	4	4	5	7	5	7	5	6	7	6
XP_021418918.1	gene9379:106602838	XM_014195762.1	XP_014051237.1	asl	FALSE	FALSE	argininosuccinate lyase	465	2049	1	protein_coding	XP_021418918.1	gi|929081580|ref|XP_014051237.1|	98.92	465	5	0	1	465	1	465	0	954	XP_021418918.1argininosuccinatelyase[Oncorhynchusmykiss]	XP_021418918.1argininosuccinatelyase[Oncorhynchusmykiss]	2	2	2		1	2	2	2	2	2	2	2	2	2	2	2	2	2	2	2	2	2	2	2
XP_021418944.1	gene9394:106602847	XM_014195780.1	XP_014051255.1	LOC106602847	FALSE	FALSE	fatty aldehyde dehydrogenase-like	489	2864	1	protein_coding	XP_021418944.1	gi|929081613|ref|XP_014051255.1|	99.59	489	2	0	1	489	1	489	0	1008	XP_021418944.1fattyaldehydedehydrogenase-likeisoformX2[Oncorhynchusmykiss];XP_021418943.1fattyaldehydedehydrogenase-likeisoformX1[Oncorhynchusmykiss];XP_021418942.1fattyaldehydedehydrogenase-likeisoformX1[Oncorhynchusmykiss]	XP_021418944.1fattyaldehydedehydrogenase-likeisoformX2[Oncorhynchusmykiss];XP_021418943.1fattyaldehydedehydrogenase-likeisoformX1[Oncorhynchusmykiss];XP_021418942.1fattyaldehydedehydrogenase-likeisoformX1[Oncorhynchusmykiss]	12;12;12	12;12;12	12;12;12	;;	3	12	12	12	12	11	12	12	12	12	12	12	9	11	12	12	11	12	12	12
XP_021418974.1	gene42309:106581141	XM_014162965.1	XP_014018440.1	LOC106581141	FALSE	FALSE	CD166 antigen homolog	569	4158	1	protein_coding	XP_021418974.1	gi|929282938|ref|XP_014018441.1|	54.58	480	206	5	8	486	7	475	5e-145	513	XP_021418974.1CD166antigenhomologisoformX3[Oncorhynchusmykiss];XP_021418972.1CD166antigenhomologisoformX2[Oncorhynchusmykiss];XP_021418971.1CD166antigenhomologisoformX1[Oncorhynchusmykiss]	XP_021418974.1CD166antigenhomologisoformX3[Oncorhynchusmykiss];XP_021418972.1CD166antigenhomologisoformX2[Oncorhynchusmykiss];XP_021418971.1CD166antigenhomologisoformX1[Oncorhynchusmykiss]	4;4;4	4;4;4	4;4;4	;;	3	4	4	4	3	3	2	3	3	2	0	1	2	1	0	3	3	2	3	3
XP_021418981.1	gene9247:106602827	XM_014195732.1	XP_014051207.1	LOC106602827	FALSE	FALSE	rho-related GTP-binding protein RhoG-like	191	1576	1	protein_coding	XP_021418981.1	gi|929081519|ref|XP_014051207.1|	98.95	191	2	0	1	191	1	191	2e-111	399	XP_021418981.1rho-relatedGTP-bindingproteinRhoG-like[Oncorhynchusmykiss];XP_021418980.1rho-relatedGTP-bindingproteinRhoG-like[Oncorhynchusmykiss];XP_021418979.1rho-relatedGTP-bindingproteinRhoG-like[Oncorhynchusmykiss];XP_021418978.1rho-relatedGTP-bindingproteinRhoG-like[Oncorhynchusmykiss];XP_021438811.1rho-relatedGTP-bindingproteinRhoG-like,partial[Oncorhynchusmykiss]	XP_021418981.1rho-relatedGTP-bindingproteinRhoG-like[Oncorhynchusmykiss];XP_021418980.1rho-relatedGTP-bindingproteinRhoG-like[Oncorhynchusmykiss];XP_021418979.1rho-relatedGTP-bindingproteinRhoG-like[Oncorhynchusmykiss];XP_021418978.1rho-relatedGTP-bindingproteinRhoG-like[Oncorhynchusmykiss];XP_021438811.1rho-relatedGTP-bindingproteinRhoG-like,partial[Oncorhynchusmykiss]	2;2;2;2;1	2;2;2;2;1	2;2;2;2;1	;;;;	5	2	2	2	1	1	2	1	1	2	1	1	1	1	1	1	1	2	1	1
XP_021418994.1	gene11657:106605034	XM_014200265.1	XP_014055740.1	LOC106605034	FALSE	FALSE	prolactin regulatory element-binding protein-like	428	2573	1	protein_coding	XP_021418994.1	gi|929090034|ref|XP_014055741.1|	98.36	427	7	0	1	427	1	427	0	875	XP_021418994.1prolactinregulatoryelement-bindingprotein-likeisoformX2[Oncorhynchusmykiss];XP_021452159.1prolactinregulatoryelement-bindingprotein-likeisoformX2[Oncorhynchusmykiss];XP_021418984.1prolactinregulatoryelement-bindingprotein-likeisoformX1[Oncorhynchusmykiss];XP_021452152.1prolactinregulatoryelement-bindingprotein-likeisoformX1[Oncorhynchusmykiss]	XP_021418994.1prolactinregulatoryelement-bindingprotein-likeisoformX2[Oncorhynchusmykiss];XP_021452159.1prolactinregulatoryelement-bindingprotein-likeisoformX2[Oncorhynchusmykiss];XP_021418984.1prolactinregulatoryelement-bindingprotein-likeisoformX1[Oncorhynchusmykiss];XP_021452152.1prolactinregulatoryelement-bindingprotein-likeisoformX1[Oncorhynchusmykiss]	2;2;2;2	2;2;2;2	2;2;2;2	;;;	4	2	2	2	2	2	2	2	2	1	2	2	1	2	1	2	2	2	2	2
XP_021418997.1	gene9236:106602820	XM_014195713.1	XP_014051188.1	acadvl	FALSE	FALSE	acyl-CoA dehydrogenase, very long chain	661	4314	1	protein_coding	XP_021418997.1	gi|929081482|ref|XP_014051189.1|	98.48	658	10	0	1	658	1	658	0	1337	XP_021418997.1verylong-chainspecificacyl-CoAdehydrogenase,mitochondrial[Oncorhynchusmykiss]	XP_021418997.1verylong-chainspecificacyl-CoAdehydrogenase,mitochondrial[Oncorhynchusmykiss]	7	7	7		1	7	7	7	7	6	6	6	6	5	6	5	5	4	6	7	6	6	6	6
XP_021419042.1	gene37077:100195409	NM_001140438.1	NP_001133910.1	alg12	FALSE	FALSE	ALG12, alpha-1,6-mannosyltransferase	491	2014	1	protein_coding	XP_021419042.1	gi|213514548|ref|NP_001133910.1|	97.35	491	13	0	6	496	1	491	0	942	XP_021419042.1dol-P-Man:Man(7)GlcNAc(2)-PP-Dolalpha-1,6-mannosyltransferase[Oncorhynchusmykiss]	XP_021419042.1dol-P-Man:Man(7)GlcNAc(2)-PP-Dolalpha-1,6-mannosyltransferase[Oncorhynchusmykiss]	2	2	2		1	2	2	2	2	2	2	2	1	2	2	2	2	2	1	2	2	2	2	1
XP_021419064.1	gene11651:106605016	XM_014200233.1	XP_014055708.1	LOC106605016	FALSE	FALSE	alpha-N-acetylgalactosaminidase-like	442	1806	1	protein_coding	XP_021419064.1	gi|929089975|ref|XP_014055708.1|	98.19	442	8	0	1	442	1	442	0	903	XP_021419064.1alpha-N-acetylgalactosaminidase-like[Oncorhynchusmykiss]	XP_021419064.1alpha-N-acetylgalactosaminidase-like[Oncorhynchusmykiss]	2	2	2		1	2	2	2	2	2	2	2	1	1	2	2	2	2	2	2	2	2	2	1
XP_021419069.1	gene37090:106575987	XM_014152769.1	XP_014008244.1	LOC106575987	FALSE	FALSE	copine-8	562	2584	1	protein_coding	XP_021419069.1	gi|929263498|ref|XP_014008244.1|	99.43	523	3	0	4	526	40	562	0	1031	XP_021419069.1copine-8isoformX4[Oncorhynchusmykiss];XP_021419068.1copine-8isoformX3[Oncorhynchusmykiss];XP_021419067.1copine-8isoformX2[Oncorhynchusmykiss];XP_021419066.1copine-8isoformX1[Oncorhynchusmykiss];XP_021433247.1copine-8-like[Oncorhynchusmykiss]	XP_021419069.1copine-8isoformX4[Oncorhynchusmykiss];XP_021419068.1copine-8isoformX3[Oncorhynchusmykiss];XP_021419067.1copine-8isoformX2[Oncorhynchusmykiss];XP_021419066.1copine-8isoformX1[Oncorhynchusmykiss];XP_021433247.1copine-8-like[Oncorhynchusmykiss]	4;4;4;4;4	3;3;3;3;3	3;3;3;3;3	;;;;	5	4	3	3	3	3	3	4	3	4	2	3	3	3	3	2	2	2	3	2
XP_021419081.1	gene37047:106575962	XM_014152733.1	XP_014008208.1	LOC106575962	FALSE	TRUE	solute carrier organic anion transporter family member 1C1-like	611	2681	1	protein_coding	XP_021419081.1	gi|929263426|ref|XP_014008208.1|	96.9	613	17	1	93	705	1	611	0	1232	XP_021419081.1solutecarrierorganicaniontransporterfamilymember1C1-like[Oncorhynchusmykiss]	XP_021419081.1solutecarrierorganicaniontransporterfamilymember1C1-like[Oncorhynchusmykiss]	3	3	3		1	3	3	3	3	3	3	3	2	3	3	3	3	3	3	3	3	3	3	2
XP_021419096.1	gene27535:106566433	XM_014134465.1	XP_013989940.1	LOC106566433	FALSE	TRUE	glycogen [starch] synthase, liver-like	703	2860	1	protein_coding	XP_021419096.1	gi|929227051|ref|XP_013989940.1|	98.58	703	9	1	1	702	1	703	0	1358	XP_021419096.1glycogen[starch]synthase,liverisoformX2[Oncorhynchusmykiss];XP_021419095.1glycogen[starch]synthase,liverisoformX1[Oncorhynchusmykiss];XP_021433223.1glycogen[starch]synthase,liver-like[Oncorhynchusmykiss]	XP_021419096.1glycogen[starch]synthase,liverisoformX2[Oncorhynchusmykiss];XP_021419095.1glycogen[starch]synthase,liverisoformX1[Oncorhynchusmykiss]	20;19;1	20;19;1	17;16;1	;	3	20	20	17	18	15	17	16	15	18	16	17	17	15	16	18	15	17	16	15
XP_021419099.1	gene37112:100195468	NM_001140497.1	NP_001133969.1	ldhb	FALSE	FALSE	L-lactate dehydrogenase B chain	334	1624	1	protein_coding	XP_021419099.1	gi|213514660|ref|NP_001133969.1|	99.4	334	2	0	1	334	1	334	0	678	XP_021419099.1L-lactatedehydrogenaseBchain[Oncorhynchusmykiss];XP_021461364.1L-lactatedehydrogenaseAchain-like[Oncorhynchusmykiss];XP_021419721.1L-lactatedehydrogenaseAchain[Oncorhynchusmykiss]	XP_021419099.1L-lactatedehydrogenaseBchain[Oncorhynchusmykiss]	25;1;1	3;0;0	3;0;0		3	25	3	3	23	22	23	23	22	22	24	22	25	24	22	2	2	3	2	3
XP_021419100.1	gene37113:106576021	XM_014152817.1	XP_014008292.1	LOC106576021	FALSE	FALSE	phosphate carrier protein, mitochondrial-like	359	1549	1	protein_coding	XP_021419100.1	gi|929263591|ref|XP_014008292.1|	97.49	359	2	1	1	352	1	359	0	647	XP_021419100.1phosphatecarrierprotein,mitochondrial-likeisoformX1[Oncorhynchusmykiss];XP_021433217.1phosphatecarrierprotein,mitochondrial-likeisoformX1[Oncorhynchusmykiss];XP_021419101.1phosphatecarrierprotein,mitochondrial-likeisoformX2[Oncorhynchusmykiss];XP_021433218.1phosphatecarrierprotein,mitochondrial-likeisoformX2[Oncorhynchusmykiss]	XP_021419100.1phosphatecarrierprotein,mitochondrial-likeisoformX1[Oncorhynchusmykiss];XP_021433217.1phosphatecarrierprotein,mitochondrial-likeisoformX1[Oncorhynchusmykiss];XP_021419101.1phosphatecarrierprotein,mitochondrial-likeisoformX2[Oncorhynchusmykiss];XP_021433218.1phosphatecarrierprotein,mitochondrial-likeisoformX2[Oncorhynchusmykiss]	7;7;6;6	3;3;2;2	3;3;2;2	;;;	4	7	3	3	7	7	6	7	6	7	7	7	5	7	7	3	3	2	3	2
XP_021419102.1	gene37114:100196765	NM_001141787.1	NP_001135259.1	lap2	FALSE	FALSE	Lamina-associated polypeptide 2 isoform beta	356	1840	1	protein_coding	XP_021419102.1	gi|213512985|ref|NP_001135259.1|	94.31	281	12	2	66	344	78	356	2e-146	517	XP_021419102.1lamina-associatedpolypeptide2,isoformsbeta/gamma-likeisoformX1[Oncorhynchusmykiss];XP_021419104.1lamina-associatedpolypeptide2,isoformsbeta/gamma-likeisoformX2[Oncorhynchusmykiss];XP_021433215.1lamina-associatedpolypeptide2,isoformsbeta/gamma-likeisoformX9[Oncorhynchusmykiss];XP_021433214.1lamina-associatedpolypeptide2-likeisoformX8[Oncorhynchusmykiss];XP_021433213.1lamina-associate…	XP_021419102.1lamina-associatedpolypeptide2,isoformsbeta/gamma-likeisoformX1[Oncorhynchusmykiss];XP_021419104.1lamina-associatedpolypeptide2,isoformsbeta/gamma-likeisoformX2[Oncorhynchusmykiss]	3;3;1;1;1;1;1;1;1;1;1	3;3;1;1;1;1;1;1;1;1;1	3;3;1;1;1;1;1;1;1;1;1	;	11	3	3	3	1	3	2	2	2	1	2	2	3	3	3	1	3	2	2	2
XP_021419111.1	gene37118:106576025	XM_014152832.1	XP_014008307.1	calu	FALSE	FALSE	calumenin	318	2190	1	protein_coding	XP_021419111.1	gi|929263625|ref|XP_014008311.1|	98.39	311	5	0	1	311	1	311	0	632	XP_021419111.1calumenin-A-likeisoformX2[Oncorhynchusmykiss];XP_021419114.1calumenin-A-likeisoformX1[Oncorhynchusmykiss];XP_021419112.1calumenin-A-likeisoformX1[Oncorhynchusmykiss];XP_021419110.1calumenin-A-likeisoformX1[Oncorhynchusmykiss];XP_021433200.1calumenin-AisoformX2[Oncorhynchusmykiss];XP_021433199.1calumenin-AisoformX1[Oncorhynchusmykiss];XP_021433198.1calumenin-AisoformX1[Oncorhynchusmy…	XP_021419111.1calumenin-A-likeisoformX2[Oncorhynchusmykiss];XP_021419114.1calumenin-A-likeisoformX1[Oncorhynchusmykiss];XP_021419112.1calumenin-A-likeisoformX1[Oncorhynchusmykiss];XP_021419110.1calumenin-A-likeisoformX1[Oncorhynchusmykiss];XP_021433200.1calumenin-AisoformX2[Oncorhynchusmykiss];XP_021433199.1calumenin-AisoformX1[Oncorhynchusmykiss];XP_021433198.1calumenin-AisoformX1[Oncorhynchusmy…	5;5;5;5;4;4;4	5;5;5;5;4;4;4	5;5;5;5;4;4;4	;;;;;;	7	5	5	5	4	4	4	5	4	4	3	3	4	4	4	4	4	4	5	4
XP_021419133.1	gene37132:106576033	XM_014152853.1	XP_014008328.1	LOC106576033	FALSE	FALSE	leukotriene A-4 hydrolase-like	615	3060	1	protein_coding	XP_021419133.1	gi|929263655|ref|XP_014008328.1|	98.37	615	10	0	7	621	1	615	0	1277	XP_021419133.1leukotrieneA-4hydrolase-like[Oncorhynchusmykiss];XP_021433186.1leukotrieneA-4hydrolase-like[Oncorhynchusmykiss]	XP_021419133.1leukotrieneA-4hydrolase-like[Oncorhynchusmykiss];XP_021433186.1leukotrieneA-4hydrolase-like[Oncorhynchusmykiss]	8;6	8;6	8;6	;	2	8	8	8	6	6	6	5	5	7	6	7	8	5	4	6	6	6	5	5
XP_021419179.1	gene16081:106609240	XM_014207794.1	XP_014063269.1	LOC106609240	FALSE	FALSE	aldose reductase-like	316	2207	1	protein_coding	XP_021419179.1	gi|929104273|ref|XP_014063269.1|	97.47	316	8	0	1	316	1	316	5e-177	619	XP_021419179.1aldosereductase-like[Oncorhynchusmykiss]	XP_021419179.1aldosereductase-like[Oncorhynchusmykiss]	8	8	6		1	8	8	6	8	8	8	7	5	8	8	8	6	8	8	8	8	8	7	5
XP_021419187.1	gene37166:106576060	XM_014152908.1	XP_014008383.1	ahcyl2	FALSE	FALSE	adenosylhomocysteinase-like 2	602	4292	1	protein_coding	XP_021419187.1	gi|929263757|ref|XP_014008384.1|	100	369	0	0	1	369	228	596	0	782	XP_021419187.1putativeadenosylhomocysteinase3[Oncorhynchusmykiss];XP_021433150.1putativeadenosylhomocysteinase3[Oncorhynchusmykiss];XP_021428608.1S-adenosylhomocysteinehydrolase-likeprotein1isoformX2[Oncorhynchusmykiss];XP_021465566.1S-adenosylhomocysteinehydrolase-likeprotein1isoformX2[Oncorhynchusmykiss];XP_021425001.1S-adenosylhomocysteinehydrolase-likeprotein1isoformX2[Oncorhynchusmykiss];XP_…	XP_021419187.1putativeadenosylhomocysteinase3[Oncorhynchusmykiss];XP_021433150.1putativeadenosylhomocysteinase3[Oncorhynchusmykiss];XP_021428608.1S-adenosylhomocysteinehydrolase-likeprotein1isoformX2[Oncorhynchusmykiss];XP_021465566.1S-adenosylhomocysteinehydrolase-likeprotein1isoformX2[Oncorhynchusmykiss];XP_021425001.1S-adenosylhomocysteinehydrolase-likeprotein1isoformX2[Oncorhynchusmykiss];XP_…	5;5;3;3;3;3;3;3;2;2;2;2	5;5;3;3;3;3;3;3;2;2;2;2	5;5;3;3;3;3;3;3;2;2;2;2	;;;;;;;	12	5	5	5	4	4	5	5	4	5	4	4	4	4	4	4	4	5	5	4
XP_021419254.1	gene16125:106609195	XM_014207711.1	XP_014063186.1	LOC106609195	FALSE	FALSE	NADH dehydrogenase [ubiquinone] 1 alpha subcomplex subunit 5-like	116	649	1	protein_coding	XP_021419254.1	gi|929104117|ref|XP_014063186.1|	100	116	0	0	1	116	1	116	4e-63	237	XP_021419254.1NADHdehydrogenase[ubiquinone]1alphasubcomplexsubunit5-like[Oncorhynchusmykiss]	XP_021419254.1NADHdehydrogenase[ubiquinone]1alphasubcomplexsubunit5-like[Oncorhynchusmykiss]	5	1	1		1	5	1	1	4	5	5	5	2	4	5	5	5	4	5	1	1	1	1	1
XP_021419270.1	gene16142:106609177	XM_014207664.1	XP_014063139.1	LOC106609177	FALSE	FALSE	ADP-ribosylation factor-like protein 1	216	1452	1	protein_coding	XP_021419270.1	gi|929104030|ref|XP_014063139.1|	98.78	164	2	0	1	164	53	216	1e-91	333	XP_021419270.1ADP-ribosylationfactor-likeprotein1isoformX2[Oncorhynchusmykiss];XP_021433070.1ADP-ribosylationfactor-likeprotein1[Oncorhynchusmykiss];XP_021419269.1ADP-ribosylationfactor-likeprotein1isoformX1[Oncorhynchusmykiss];XP_021456633.1ADP-ribosylationfactor-likeprotein1[Oncorhynchusmykiss]	XP_021419270.1ADP-ribosylationfactor-likeprotein1isoformX2[Oncorhynchusmykiss];XP_021433070.1ADP-ribosylationfactor-likeprotein1[Oncorhynchusmykiss];XP_021419269.1ADP-ribosylationfactor-likeprotein1isoformX1[Oncorhynchusmykiss];XP_021456633.1ADP-ribosylationfactor-likeprotein1[Oncorhynchusmykiss]	6;6;6;5	6;6;6;5	6;6;6;5	;;;	4	6	6	6	6	6	6	6	6	6	6	6	6	6	6	6	6	6	6	6
XP_021419327.1	gene37263:106576169	XM_014153134.1	XP_014008609.1	LOC106576169	FALSE	FALSE	lipase maturation factor 2-like	707	3322	1	protein_coding	XP_021419327.1	gi|929264203|ref|XP_014008609.1|	95.47	707	32	0	1	707	1	707	0	1355	XP_021419327.1lipasematurationfactor2-like[Oncorhynchusmykiss]	XP_021419327.1lipasematurationfactor2-like[Oncorhynchusmykiss]	5	3	3		1	5	3	3	4	4	5	4	3	5	4	4	3	4	4	2	3	3	2	1
XP_021419347.1	gene74347:100195182	NM_001140211.1	NP_001133683.1	pahx	FALSE	TRUE	Phytanoyl-CoA dioxygenase, peroxisomal	332	1755	1	protein_coding	XP_021419347.1	gi|213514550|ref|NP_001133683.1|	97.89	332	7	0	18	349	1	332	0	692	XP_021419347.1phytanoyl-CoAdioxygenase,peroxisomalisoformX1[Oncorhynchusmykiss];XP_021419348.1phytanoyl-CoAdioxygenase,peroxisomalisoformX2[Oncorhynchusmykiss]	XP_021419347.1phytanoyl-CoAdioxygenase,peroxisomalisoformX1[Oncorhynchusmykiss];XP_021419348.1phytanoyl-CoAdioxygenase,peroxisomalisoformX2[Oncorhynchusmykiss]	15;9	15;9	15;9	;	2	15	15	15	15	15	15	13	15	15	15	14	13	14	15	15	15	15	13	15
XP_021419377.1	gene37304:106576202	XM_014153193.1	XP_014008668.1	LOC106576202	FALSE	FALSE	ATP synthase subunit gamma, mitochondrial-like	293	1161	1	protein_coding	XP_021419377.1	gi|929264319|ref|XP_014008668.1|	99.32	293	2	0	1	293	1	293	2e-170	597	XP_021419377.1ATPsynthasesubunitgamma,mitochondrial-likeisoformX2[Oncorhynchusmykiss];XP_021419376.1ATPsynthasesubunitgamma,mitochondrial-likeisoformX1[Oncorhynchusmykiss]	XP_021419377.1ATPsynthasesubunitgamma,mitochondrial-likeisoformX2[Oncorhynchusmykiss];XP_021419376.1ATPsynthasesubunitgamma,mitochondrial-likeisoformX1[Oncorhynchusmykiss]	7;7	1;1	1;1	;	2	7	1	1	6	7	6	7	7	6	6	6	6	6	7	1	1	1	1	1
XP_021419489.1	gene37387:106576281	XM_014153365.1	XP_014008840.1	LOC106576281	FALSE	FALSE	phenylalanine-4-hydroxylase-like	455	2352	1	protein_coding	XP_021419489.1	gi|929264648|ref|XP_014008840.1|	98.24	455	8	0	1	455	1	455	0	934	XP_021419489.1phenylalanine-4-hydroxylase-likeisoformX1[Oncorhynchusmykiss];XP_021419491.1phenylalanine-4-hydroxylase-likeisoformX3[Oncorhynchusmykiss];XP_021419490.1phenylalanine-4-hydroxylase-likeisoformX2[Oncorhynchusmykiss];XP_021454297.1tryptophan5-hydroxylase1[Oncorhynchusmykiss];XP_021463205.1tryptophan5-hydroxylase1-like[Oncorhynchusmykiss];XP_021442085.1tryptophan5-hydroxylase1-like[Onco…	XP_021419489.1phenylalanine-4-hydroxylase-likeisoformX1[Oncorhynchusmykiss];XP_021419491.1phenylalanine-4-hydroxylase-likeisoformX3[Oncorhynchusmykiss];XP_021419490.1phenylalanine-4-hydroxylase-likeisoformX2[Oncorhynchusmykiss]	22;20;20;1;1;1	22;20;20;1;1;1	5;5;5;0;0;0	;;	6	22	22	5	22	22	21	21	21	22	22	21	22	22	22	22	22	21	21	21
XP_021419551.1	gene37446:106576351	XM_014153471.1	XP_014008946.1	LOC106576351	FALSE	FALSE	golgin subfamily B member 1-like	3056	12815	1	protein_coding	XP_021419551.1	gi|929264863|ref|XP_014008948.1|	92.57	3067	174	3	1	3027	1	3053	0	5262	XP_021419551.1golginsubfamilyBmember1-likeisoformX2[Oncorhynchusmykiss];XP_021419550.1golginsubfamilyBmember1-likeisoformX1[Oncorhynchusmykiss];XP_021432762.1golginsubfamilyBmember1-like[Oncorhynchusmykiss]	XP_021419551.1golginsubfamilyBmember1-likeisoformX2[Oncorhynchusmykiss];XP_021419550.1golginsubfamilyBmember1-likeisoformX1[Oncorhynchusmykiss];XP_021432762.1golginsubfamilyBmember1-like[Oncorhynchusmykiss]	2;2;2	2;2;2	2;2;2	;;	3	2	2	2	1	2	2	2	2	2	2	1	1	1	2	1	2	2	2	2
XP_021419566.1	gene16380:106609493	XM_014208366.1	XP_014063841.1	LOC106609493	FALSE	FALSE	guanine nucleotide-binding protein G(i) subunit alpha-1	354	2353	1	protein_coding	XP_021419566.1	gi|929105354|ref|XP_014063841.1|	99.72	354	1	0	1	354	1	354	0	731	XP_021419566.1guaninenucleotide-bindingproteinG(i)subunitalpha-1[Oncorhynchusmykiss];XP_021434202.1guaninenucleotide-bindingproteinG(i)subunitalpha-1-like[Oncorhynchusmykiss];XP_021456682.1guaninenucleotide-bindingproteinG(i)subunitalpha-1-like[Oncorhynchusmykiss];XP_021429394.1guaninenucleotide-bindingproteinG(i)subunitalpha-1isoformX1[Oncorhynchusmykiss];XP_021429400.1guaninenucleotide-bindingp…	XP_021419566.1guaninenucleotide-bindingproteinG(i)subunitalpha-1[Oncorhynchusmykiss];XP_021434202.1guaninenucleotide-bindingproteinG(i)subunitalpha-1-like[Oncorhynchusmykiss];XP_021456682.1guaninenucleotide-bindingproteinG(i)subunitalpha-1-like[Oncorhynchusmykiss];XP_021429394.1guaninenucleotide-bindingproteinG(i)subunitalpha-1isoformX1[Oncorhynchusmykiss];XP_021429400.1guaninenucleotide-bindingp…	7;6;5;5;4	3;2;1;1;1	3;2;1;1;1	;;;;	5	7	3	3	5	7	7	7	6	7	7	6	7	6	7	3	3	3	3	3
XP_021419571.1	gene37468:106576424	XM_014153602.1	XP_014009077.1	LOC106576424	FALSE	FALSE	myotrophin	117	1836	1	protein_coding	XP_021419571.1	gi|929265105|ref|XP_014009077.1|	100	117	0	0	1	117	1	117	5e-63	237	XP_021419571.1myotrophin[Oncorhynchusmykiss];XP_021432739.1myotrophin-like[Oncorhynchusmykiss]	XP_021419571.1myotrophin[Oncorhynchusmykiss];XP_021432739.1myotrophin-like[Oncorhynchusmykiss]	4;3	4;3	4;3	;	2	4	4	4	3	3	3	4	3	3	2	3	3	2	3	3	3	3	4	3
XP_021419644.1	gene37506:106576396	XM_014153538.1	XP_014009013.1	LOC106576396	FALSE	FALSE	ubiquitin-conjugating enzyme E2 N-like	154	1842	1	protein_coding	XP_021419644.1	gi|929264984|ref|XP_014009013.1|	100	154	0	0	1	154	1	154	6e-87	317	XP_021419644.1ubiquitin-conjugatingenzymeE2N-like[Oncorhynchusmykiss]	XP_021419644.1ubiquitin-conjugatingenzymeE2N-like[Oncorhynchusmykiss]	7	2	2		1	7	2	2	7	6	7	7	7	7	7	6	6	7	6	2	2	2	2	2
XP_021419662.1	gene37529:106576372	XM_014153503.1	XP_014008978.1	LOC106576372	FALSE	FALSE	protein kinase C and casein kinase substrate in neurons protein 2-like	511	4026	1	protein_coding	XP_021419662.1	gi|929264929|ref|XP_014008983.1|	97.06	442	11	1	1	440	1	442	0	876	XP_021419662.1proteinkinaseCandcaseinkinasesubstrateinneuronsprotein2-like[Oncorhynchusmykiss]	XP_021419662.1proteinkinaseCandcaseinkinasesubstrateinneuronsprotein2-like[Oncorhynchusmykiss]	7	7	3		1	7	7	3	6	7	6	7	4	7	7	7	7	7	6	6	7	6	7	4
XP_021419683.1	gene37554:100195033	XM_014153659.1	XP_014009134.1	lum	FALSE	FALSE	lumican	360	2501	1	protein_coding	XP_021419683.1	gi|929265206|ref|XP_014009134.1|	98.83	342	4	0	1	342	19	360	0	694	XP_021419683.1lumican-like[Oncorhynchusmykiss];XP_021419682.1lumican-like[Oncorhynchusmykiss]	XP_021419683.1lumican-like[Oncorhynchusmykiss];XP_021419682.1lumican-like[Oncorhynchusmykiss]	7;7	2;2	2;2	;	2	7	2	2	6	7	7	6	7	7	5	7	7	7	7	2	2	2	1	2
XP_021419689.1	gene37597:106576502	XM_014153716.1	XP_014009191.1	LOC106576502	FALSE	FALSE	protein FAM3C-like	225	3016	1	protein_coding	XP_021419689.1	gi|929265309|ref|XP_014009191.1|	96.89	225	7	0	1	225	1	225	1e-126	450	XP_021419689.1proteinFAM3CisoformX2[Oncorhynchusmykiss];XP_021419688.1proteinFAM3CisoformX2[Oncorhynchusmykiss];XP_021419686.1proteinFAM3CisoformX1[Oncorhynchusmykiss];XP_021432617.1proteinFAM3C-like[Oncorhynchusmykiss]	XP_021419689.1proteinFAM3CisoformX2[Oncorhynchusmykiss];XP_021419688.1proteinFAM3CisoformX2[Oncorhynchusmykiss];XP_021419686.1proteinFAM3CisoformX1[Oncorhynchusmykiss];XP_021432617.1proteinFAM3C-like[Oncorhynchusmykiss]	2;2;2;1	2;2;2;1	2;2;2;1	;;;	4	2	2	2	1	1	2	2	1	2	2	1	1	1	1	1	1	2	2	1
XP_021419698.1	gene37595:100306833	NM_001165372.1	NP_001158844.1	imdh1	FALSE	TRUE	Inosine-5-monophosphate dehydrogenase 1	541	3898	1	protein_coding	XP_021419698.1	gi|259155206|ref|NP_001158844.1|	94.27	541	4	1	1	514	1	541	0	1033	XP_021419698.1inosine-5'-monophosphatedehydrogenase1bisoformX6[Oncorhynchusmykiss];XP_021419697.1inosine-5'-monophosphatedehydrogenase1bisoformX6[Oncorhynchusmykiss];XP_021419696.1inosine-5'-monophosphatedehydrogenase1bisoformX5[Oncorhynchusmykiss];XP_021419695.1inosine-5'-monophosphatedehydrogenase1bisoformX4[Oncorhynchusmykiss];XP_021419694.1inosine-5'-monophosphatedehydrogenase1bisoformX4[Onco…	XP_021419698.1inosine-5'-monophosphatedehydrogenase1bisoformX6[Oncorhynchusmykiss];XP_021419697.1inosine-5'-monophosphatedehydrogenase1bisoformX6[Oncorhynchusmykiss];XP_021419696.1inosine-5'-monophosphatedehydrogenase1bisoformX5[Oncorhynchusmykiss];XP_021419695.1inosine-5'-monophosphatedehydrogenase1bisoformX4[Oncorhynchusmykiss];XP_021419694.1inosine-5'-monophosphatedehydrogenase1bisoformX4[Onco…	2;2;2;2;2;2;2;2;1;1;1;1;1;1;1	2;2;2;2;2;2;2;2;1;1;1;1;1;1;1	2;2;2;2;2;2;2;2;1;1;1;1;1;1;1	;;;;;;;;;;;;;;	15	2	2	2	2	1	2	2	2	2	1	1	1	1	1	2	1	2	2	2
XP_021419705.1	gene16757:106609839	XM_014208858.1	XP_014064333.1	LOC106609839	FALSE	TRUE	ras-related protein Rab-21	219	940	1	protein_coding	XP_021419705.1	gi|929106276|ref|XP_014064333.1|	98.95	191	2	0	1	191	1	191	4e-109	392	XP_021419705.1ras-relatedproteinRab-21,partial[Oncorhynchusmykiss];XP_021434134.1ras-relatedproteinRab-21-like[Oncorhynchusmykiss]	XP_021419705.1ras-relatedproteinRab-21,partial[Oncorhynchusmykiss];XP_021434134.1ras-relatedproteinRab-21-like[Oncorhynchusmykiss]	7;7	7;7	7;7	;	2	7	7	7	7	5	5	6	6	5	7	7	6	6	7	7	5	5	6	6
XP_021419712.1	gene15812:106608917	XM_014207126.1	XP_014062601.1	LOC106608917	FALSE	TRUE	plasma membrane calcium-transporting ATPase 1-like	1282	6695	1	protein_coding	XP_021419712.1	gi|929103040|ref|XP_014062607.1|	97.15	1194	20	2	1	1180	1	1194	0	2266	XP_021419712.1plasmamembranecalcium-transportingATPase1-like[Oncorhynchusmykiss];XP_021450083.1plasmamembranecalcium-transportingATPase1-like[Oncorhynchusmykiss];XP_021434050.1plasmamembranecalcium-transportingATPase1[Oncorhynchusmykiss];XP_021449896.1plasmamembranecalcium-transportingATPase2-like[Oncorhynchusmykiss];XP_021438805.1plasmamembranecalcium-transportingATPase1-like[Oncorhynchusmykiss]…	XP_021419712.1plasmamembranecalcium-transportingATPase1-like[Oncorhynchusmykiss];XP_021450083.1plasmamembranecalcium-transportingATPase1-like[Oncorhynchusmykiss];XP_021434050.1plasmamembranecalcium-transportingATPase1[Oncorhynchusmykiss]	3;3;2;1;1;1;1;1;1;1;1;1;1;1;1;1;1;1;1;1;1;1;1;1;1	3;3;2;1;1;1;1;1;1;1;1;1;1;1;1;1;1;1;1;1;1;1;1;1;1	3;3;2;1;1;1;1;1;1;1;1;1;1;1;1;1;1;1;1;1;1;1;1;1;1	;;	25	3	3	3	2	3	3	2	3	3	3	3	2	3	3	2	3	3	2	3
XP_021419742.1	gene35067:106573927	XM_014149389.1	XP_014004864.1	LOC106573927	FALSE	FALSE	microtubule-associated protein 1B-like	1394	7631	1	protein_coding	XP_021419742.1	gi|929257012|ref|XP_014004864.1|	95.44	1403	55	1	1	1403	1	1394	0	2699	XP_021419742.1microtubule-associatedprotein1B-like[Oncorhynchusmykiss];XP_021456873.1microtubule-associatedprotein1B-like[Oncorhynchusmykiss]	XP_021419742.1microtubule-associatedprotein1B-like[Oncorhynchusmykiss]	5;1	3;0	3;0		2	5	3	3	3	4	2	4	3	3	2	3	3	3	4	1	2	1	2	1
XP_021419747.1	gene16695:106609775	XM_014208788.1	XP_014064263.1	LOC106609775	FALSE	FALSE	prestin-like	747	3937	1	protein_coding	XP_021419747.1	gi|929106133|ref|XP_014064259.1|	98.39	747	12	0	1	747	1	747	0	1500	XP_021419747.1prestin-likeisoformX2[Oncorhynchusmykiss];XP_021434153.1prestin-like[Oncorhynchusmykiss];XP_021419750.1prestin-likeisoformX4[Oncorhynchusmykiss];XP_021419749.1prestin-likeisoformX3[Oncorhynchusmykiss];XP_021419746.1prestin-likeisoformX1[Oncorhynchusmykiss];XP_021419745.1prestin-likeisoformX1[Oncorhynchusmykiss];XP_021419744.1prestin-likeisoformX1[Oncorhynchusmykiss];XP_021419743.1pr…	XP_021419747.1prestin-likeisoformX2[Oncorhynchusmykiss];XP_021434153.1prestin-like[Oncorhynchusmykiss];XP_021419750.1prestin-likeisoformX4[Oncorhynchusmykiss];XP_021419749.1prestin-likeisoformX3[Oncorhynchusmykiss];XP_021419746.1prestin-likeisoformX1[Oncorhynchusmykiss];XP_021419745.1prestin-likeisoformX1[Oncorhynchusmykiss];XP_021419744.1prestin-likeisoformX1[Oncorhynchusmykiss];XP_021419743.1pr…	6;5;5;5;5;5;5;5;5;5	6;5;5;5;5;5;5;5;5;5	6;5;5;5;5;5;5;5;5;5	;;;;;;;;;	10	6	6	6	6	6	6	6	5	5	6	6	6	6	6	6	6	6	6	5
XP_021419753.1	gene16692:106609773	XM_014208782.1	XP_014064257.1	pmpcb	FALSE	FALSE	peptidase (mitochondrial processing) beta	489	1632	1	protein_coding	XP_021419753.1	gi|929106129|ref|XP_014064257.1|	99.74	384	1	0	1	384	106	489	0	810	XP_021419753.1mitochondrial-processingpeptidasesubunitbeta-like[Oncorhynchusmykiss];XP_021432523.1mitochondrial-processingpeptidasesubunitbeta-like[Oncorhynchusmykiss];XP_021449104.1mitochondrial-processingpeptidasesubunitbeta-like,partial[Oncorhynchusmykiss]	XP_021419753.1mitochondrial-processingpeptidasesubunitbeta-like[Oncorhynchusmykiss];XP_021432523.1mitochondrial-processingpeptidasesubunitbeta-like[Oncorhynchusmykiss];XP_021449104.1mitochondrial-processingpeptidasesubunitbeta-like,partial[Oncorhynchusmykiss]	8;8;4	8;8;4	8;8;4	;;	3	8	8	8	7	7	7	8	7	6	7	7	7	7	8	7	7	7	8	7
XP_021419787.1	gene79075:106596479	XM_014187758.1	XP_014043233.1	LOC106596479	FALSE	TRUE	N-acylneuraminate cytidylyltransferase-like	433	2591	1	protein_coding	XP_021419787.1	gi|929334721|ref|XP_014043233.1|	97.92	433	9	0	1	433	1	433	0	877	XP_021419787.1N-acylneuraminatecytidylyltransferase-likeisoformX3[Oncorhynchusmykiss];XP_021419786.1N-acylneuraminatecytidylyltransferase-likeisoformX2[Oncorhynchusmykiss];XP_021419785.1N-acylneuraminatecytidylyltransferase-likeisoformX1[Oncorhynchusmykiss];XP_021419788.1N-acylneuraminatecytidylyltransferase[Oncorhynchusmykiss];XP_021429202.1N-acylneuraminatecytidylyltransferase-like[Oncorhynchus…	XP_021419787.1N-acylneuraminatecytidylyltransferase-likeisoformX3[Oncorhynchusmykiss];XP_021419786.1N-acylneuraminatecytidylyltransferase-likeisoformX2[Oncorhynchusmykiss];XP_021419785.1N-acylneuraminatecytidylyltransferase-likeisoformX1[Oncorhynchusmykiss];XP_021419788.1N-acylneuraminatecytidylyltransferase[Oncorhynchusmykiss]	13;13;13;7;2	13;13;13;7;2	13;13;13;7;2	;;;	5	13	13	13	13	12	12	12	12	13	12	12	13	13	12	13	12	12	12	12
XP_021419794.1	gene37685:106576589	XM_014153826.1	XP_014009301.1	LOC106576589	FALSE	FALSE	probable tRNA N6-adenosine threonylcarbamoyltransferase	348	1874	1	protein_coding	XP_021419794.1	gi|929265517|ref|XP_014009302.1|	100	335	0	0	1	335	1	335	0	697	XP_021419794.1probabletRNAN6-adenosinethreonylcarbamoyltransferaseisoformX2[Oncorhynchusmykiss];XP_021419791.1probabletRNAN6-adenosinethreonylcarbamoyltransferaseisoformX3[Oncorhynchusmykiss];XP_021419790.1probabletRNAN6-adenosinethreonylcarbamoyltransferaseisoformX2[Oncorhynchusmykiss];XP_021419793.1probabletRNAN6-adenosinethreonylcarbamoyltransferaseisoformX1[Oncorhynchusmykiss];XP_021419792.1p…	XP_021419794.1probabletRNAN6-adenosinethreonylcarbamoyltransferaseisoformX2[Oncorhynchusmykiss];XP_021419791.1probabletRNAN6-adenosinethreonylcarbamoyltransferaseisoformX3[Oncorhynchusmykiss];XP_021419790.1probabletRNAN6-adenosinethreonylcarbamoyltransferaseisoformX2[Oncorhynchusmykiss];XP_021419793.1probabletRNAN6-adenosinethreonylcarbamoyltransferaseisoformX1[Oncorhynchusmykiss];XP_021419792.1p…	3;3;3;3;3;3	3;3;3;3;3;3	3;3;3;3;3;3	;;;;;	6	3	3	3	2	2	2	2	2	1	3	3	2	3	2	2	2	2	2	2
XP_021419800.1	gene37689:100196733	NM_001141755.1	NP_001135227.1	apex1	FALSE	FALSE	APEX nuclease (multifunctional DNA repair enzyme) 1	312	2421	1	protein_coding	XP_021419800.1	gi|213512198|ref|NP_001135227.1|	100	312	0	0	1	312	1	312	0	651	XP_021419800.1DNA-(apurinicorapyrimidinicsite)lyase-like[Oncorhynchusmykiss];XP_021419799.1DNA-(apurinicorapyrimidinicsite)lyase-like[Oncorhynchusmykiss];XP_021419798.1DNA-(apurinicorapyrimidinicsite)lyase-like[Oncorhynchusmykiss];XP_021419797.1DNA-(apurinicorapyrimidinicsite)lyase-like[Oncorhynchusmykiss];XP_021419795.1DNA-(apurinicorapyrimidinicsite)lyase-like[Oncorhynchusmykiss]	XP_021419800.1DNA-(apurinicorapyrimidinicsite)lyase-like[Oncorhynchusmykiss];XP_021419799.1DNA-(apurinicorapyrimidinicsite)lyase-like[Oncorhynchusmykiss];XP_021419798.1DNA-(apurinicorapyrimidinicsite)lyase-like[Oncorhynchusmykiss];XP_021419797.1DNA-(apurinicorapyrimidinicsite)lyase-like[Oncorhynchusmykiss];XP_021419795.1DNA-(apurinicorapyrimidinicsite)lyase-like[Oncorhynchusmykiss]	6;6;6;6;6	6;6;6;6;6	6;6;6;6;6	;;;;	5	6	6	6	6	6	6	6	6	6	6	6	6	6	6	6	6	6	6	6
XP_021419821.1	gene27251:106566202	XM_014134076.1	XP_013989551.1	LOC106566202	FALSE	FALSE	cullin-associated NEDD8-dissociated protein 1-like	1238	4129	1	protein_coding	XP_021419821.1	gi|929226302|ref|XP_013989551.1|	67.66	1243	388	7	1	1234	1	1238	0	1705	XP_021419821.1cullin-associatedNEDD8-dissociatedprotein1[Oncorhynchusmykiss];XP_021419822.1cullin-associatedNEDD8-dissociatedprotein1-like[Oncorhynchusmykiss];XP_021450826.1cullin-associatedNEDD8-dissociatedprotein1-like[Oncorhynchusmykiss];XP_021448767.1cullin-associatedNEDD8-dissociatedprotein1-like[Oncorhynchusmykiss];XP_021419825.1cullin-associatedNEDD8-dissociatedprotein1-like[Oncorhynchusmy…	XP_021419821.1cullin-associatedNEDD8-dissociatedprotein1[Oncorhynchusmykiss];XP_021419822.1cullin-associatedNEDD8-dissociatedprotein1-like[Oncorhynchusmykiss]	28;17;4;4;4;1	28;17;4;4;4;1	28;17;4;4;4;1	;	6	28	28	28	26	26	27	25	23	26	26	25	24	27	25	26	26	27	25	23
XP_021419826.1	gene37728:106576640	XM_014153884.1	XP_014009359.1	LOC106576640	FALSE	TRUE	ras-related protein Rap-1b	184	1654	1	protein_coding	XP_021419826.1	gi|929265627|ref|XP_014009359.1|	100	184	0	0	2	185	1	184	3e-105	379	XP_021419826.1ras-relatedproteinRap-1b[Oncorhynchusmykiss];XP_021449287.1ras-relatedproteinRap-1b-like,partial[Oncorhynchusmykiss]	XP_021419826.1ras-relatedproteinRap-1b[Oncorhynchusmykiss]	7;3	7;3	2;0		2	7	7	2	7	6	6	6	6	7	6	6	7	6	6	7	6	6	6	6
XP_021419831.1	gene37669:106576598	XM_014153843.1	XP_014009318.1	LOC106576598	FALSE	FALSE	plexin-B2-like	1859	8158	1	protein_coding	XP_021419831.1	gi|929265545|ref|XP_014009318.1|	95.54	1863	77	3	1	1861	1	1859	0	3699	XP_021419831.1plexin-B2-like[Oncorhynchusmykiss];XP_021419936.1plexin-B2-like[Oncorhynchusmykiss];XP_021456896.1LOWQUALITYPROTEIN:plexin-B2-like[Oncorhynchusmykiss];XP_021423603.1plexin-B2-like[Oncorhynchusmykiss];XP_021419833.1plexin-B2-like[Oncorhynchusmykiss];XP_021472694.1plexin-B3-like[Oncorhynchusmykiss];XP_021420211.1plexin-B3-like[Oncorhynchusmykiss];XP_021419340.1plexin-C1-like[Oncorhync…	XP_021419831.1plexin-B2-like[Oncorhynchusmykiss]	15;5;4;4;1;1;1;1;1;1;1;1	15;5;4;4;1;1;1;1;1;1;1;1	14;5;3;3;1;0;0;0;0;0;0;0		12	15	15	14	13	15	11	14	11	13	13	12	11	12	13	13	15	11	14	11
XP_021419839.1	gene21527:106560703	XM_014123849.1	XP_013979324.1	LOC106560703	FALSE	FALSE	nucleosome assembly protein 1-like 4	404	2936	1	protein_coding	XP_021419839.1	gi|929123379|ref|XP_013979326.1|	99.14	349	3	0	1	349	35	383	0	706	XP_021419839.1nucleosomeassemblyprotein1-like4isoformX1[Oncorhynchusmykiss];XP_021419862.1nucleosomeassemblyprotein1-like4isoformX2[Oncorhynchusmykiss];XP_021419858.1nucleosomeassemblyprotein1-like4isoformX2[Oncorhynchusmykiss];XP_021419854.1nucleosomeassemblyprotein1-like4isoformX2[Oncorhynchusmykiss];XP_021419847.1nucleosomeassemblyprotein1-like4isoformX2[Oncorhynchusmykiss]	XP_021419839.1nucleosomeassemblyprotein1-like4isoformX1[Oncorhynchusmykiss];XP_021419862.1nucleosomeassemblyprotein1-like4isoformX2[Oncorhynchusmykiss];XP_021419858.1nucleosomeassemblyprotein1-like4isoformX2[Oncorhynchusmykiss];XP_021419854.1nucleosomeassemblyprotein1-like4isoformX2[Oncorhynchusmykiss];XP_021419847.1nucleosomeassemblyprotein1-like4isoformX2[Oncorhynchusmykiss]	8;8;8;8;8	8;8;8;8;8	7;7;7;7;7	;;;;	5	8	8	7	7	7	7	8	5	8	7	7	7	8	7	7	7	7	8	5
XP_021419844.1	gene15192:106608373	XM_014206278.1	XP_014061753.1	LOC106608373	FALSE	TRUE	dihydroxyacetone phosphate acyltransferase-like	506	2818	1	protein_coding	XP_021419844.1	gi|929101347|ref|XP_014061753.1|	94.57	442	23	1	173	613	1	442	0	859	XP_021419844.1dihydroxyacetonephosphateacyltransferase-like[Oncorhynchusmykiss]	XP_021419844.1dihydroxyacetonephosphateacyltransferase-like[Oncorhynchusmykiss]	7	7	7		1	7	7	7	5	6	5	5	6	5	5	7	5	5	7	5	6	5	5	6
XP_021419888.1	gene37302:106576198	XM_014153190.1	XP_014008665.1	LOC106576198	FALSE	FALSE	inter-alpha-trypsin inhibitor heavy chain H2-like	939	3425	1	protein_coding	XP_021419888.1	gi|929264315|ref|XP_014008665.1|	93.63	926	36	2	14	916	14	939	0	1782	XP_021419888.1inter-alpha-trypsininhibitorheavychainH2[Oncorhynchusmykiss];XP_021432976.1inter-alpha-trypsininhibitorheavychainH2-likeisoformX2[Oncorhynchusmykiss];XP_021432975.1inter-alpha-trypsininhibitorheavychainH2-likeisoformX1[Oncorhynchusmykiss]	XP_021419888.1inter-alpha-trypsininhibitorheavychainH2[Oncorhynchusmykiss];XP_021432976.1inter-alpha-trypsininhibitorheavychainH2-likeisoformX2[Oncorhynchusmykiss];XP_021432975.1inter-alpha-trypsininhibitorheavychainH2-likeisoformX1[Oncorhynchusmykiss]	11;8;8	11;8;8	11;8;8	;;	3	11	11	11	9	9	10	10	7	7	11	11	10	11	9	9	9	10	10	7
XP_021419904.1	gene37576:100380729	XM_014153685.1	XP_014009160.1	snd1	FALSE	TRUE	staphylococcal nuclease and tudor domain containing 1	962	4502	1	protein_coding	XP_021419904.1	gi|929265251|ref|XP_014009160.1|	99.68	619	2	0	1	619	134	752	0	1249	XP_021419904.1staphylococcalnucleasedomain-containingprotein1-like[Oncorhynchusmykiss]	XP_021419904.1staphylococcalnucleasedomain-containingprotein1-like[Oncorhynchusmykiss]	27	3	3		1	27	3	3	27	25	25	26	23	24	23	23	22	23	25	3	3	3	3	3
XP_021419977.1	gene21536:100195273	XM_014123794.1	XP_013979269.1	cata	FALSE	FALSE	Catalase	524	3350	1	protein_coding	XP_021419977.1	gi|929123278|ref|XP_013979269.1|	98.8	500	6	0	20	519	22	521	0	1045	XP_021419977.1catalase-likeisoformX2[Oncorhynchusmykiss];XP_021419969.1catalase-likeisoformX1[Oncorhynchusmykiss];XP_021419985.1catalase-likeisoformX3[Oncorhynchusmykiss]	XP_021419977.1catalase-likeisoformX2[Oncorhynchusmykiss];XP_021419969.1catalase-likeisoformX1[Oncorhynchusmykiss];XP_021419985.1catalase-likeisoformX3[Oncorhynchusmykiss]	18;18;16	7;7;6	7;7;6	;;	3	18	7	7	16	18	15	18	14	18	14	18	16	14	18	5	7	4	7	6
XP_021419989.1	gene52184:106590645	XM_014181782.1	XP_014037257.1	LOC106590645	FALSE	FALSE	calponin-3-like	286	2471	1	protein_coding	XP_021419989.1	gi|929318705|ref|XP_014037257.1|	60.63	287	46	7	1	221	1	286	4e-83	306	XP_021419989.1calponin-3-like[Oncorhynchusmykiss]	XP_021419989.1calponin-3-like[Oncorhynchusmykiss]	3	3	2		1	3	3	2	2	2	2	1	3	2	3	2	3	1	3	2	2	2	1	3
XP_021420045.1	gene21540:106560694	XM_014123817.1	XP_013979292.1	LOC106560694	FALSE	FALSE	junctional adhesion molecule A-like	292	1932	1	protein_coding	XP_021420045.1	gi|929123318|ref|XP_013979292.1|	94.87	273	11	2	2	274	23	292	2e-146	517	XP_021420045.1junctionaladhesionmoleculeA-likeisoformX2[Oncorhynchusmykiss];XP_021420043.1junctionaladhesionmoleculeA-likeisoformX1[Oncorhynchusmykiss]	XP_021420045.1junctionaladhesionmoleculeA-likeisoformX2[Oncorhynchusmykiss];XP_021420043.1junctionaladhesionmoleculeA-likeisoformX1[Oncorhynchusmykiss]	2;2	2;2	2;2	;	2	2	2	2	2	2	2	1	2	2	2	1	2	2	2	2	2	2	1	2
XP_021420054.1	gene40094:106578982	XM_014158348.1	XP_014013823.1	LOC106578982	FALSE	FALSE	retinol-binding protein 4-B	192	948	1	protein_coding	XP_021420054.1	gi|929274240|ref|XP_014013823.1|	99.48	192	1	0	15	206	1	192	2e-113	407	XP_021420054.1retinol-bindingprotein2isoformX1[Oncorhynchusmykiss]	XP_021420054.1retinol-bindingprotein2isoformX1[Oncorhynchusmykiss]	2	2	2		1	2	2	2	2	2	2	1	1	1	2	2	2	2	2	2	2	2	1	1
XP_021420055.1	gene28282:106567155	XM_014136140.1	XP_013991615.1	LOC106567155	FALSE	FALSE	C4b-binding protein alpha chain-like	321	3301	1	protein_coding	XP_021420055.1	gi|929230149|ref|XP_013991615.1|	83.7	270	44	0	1	270	1	270	4e-131	466	XP_021420055.1complementreceptor-likeisoformX1[Oncorhynchusmykiss];XP_021420077.1C4b-bindingproteinalphachainisoformX5[Oncorhynchusmykiss];XP_021420076.1C4b-bindingproteinalphachainisoformX4[Oncorhynchusmykiss];XP_021420075.1C4b-bindingproteinalphachainisoformX3[Oncorhynchusmykiss];XP_021420072.1C4b-bindingproteinalphachainisoformX2[Oncorhynchusmykiss];XP_021420071.1C4b-bindingproteinalphachainis…	XP_021420055.1complementreceptor-likeisoformX1[Oncorhynchusmykiss]	3;1;1;1;1;1	3;1;1;1;1;1	3;1;1;1;1;1		6	3	3	3	3	3	3	3	3	3	2	2	2	2	3	3	3	3	3	3
XP_021420066.1	gene28058:106566958	XM_014135656.1	XP_013991131.1	LOC106566958	FALSE	FALSE	protein RER1-like	195	2498	1	protein_coding	XP_021420066.1	gi|929229262|ref|XP_013991131.1|	100	195	0	0	1	195	1	195	1e-112	404	XP_021420066.1proteinRER1isoformX1[Oncorhynchusmykiss]	XP_021420066.1proteinRER1isoformX1[Oncorhynchusmykiss]	2	1	1		1	2	1	1	1	0	1	1	2	1	0	1	1	1	1	0	0	0	0	1
XP_021420070.1	gene28062:100194660	XM_014135540.1	XP_013991015.1	LOC100194660	FALSE	FALSE	Y-box binding protein-2	326	1516	1	protein_coding	XP_021420070.1	gi|929229053|ref|XP_013991017.1|	98.69	305	4	0	1	305	1	305	2e-168	590	XP_021420070.1Y-boxbindingproteinisoformX3[Oncorhynchusmykiss];XP_021420069.1Y-boxbindingproteinisoformX2[Oncorhynchusmykiss];XP_021420068.1Y-boxbindingproteinisoformX1[Oncorhynchusmykiss]	XP_021420070.1Y-boxbindingproteinisoformX3[Oncorhynchusmykiss];XP_021420069.1Y-boxbindingproteinisoformX2[Oncorhynchusmykiss];XP_021420068.1Y-boxbindingproteinisoformX1[Oncorhynchusmykiss]	3;3;3	2;2;2	2;2;2	;;	3	3	2	2	3	3	3	3	3	3	3	3	2	3	3	2	2	2	2	2
XP_021420082.1	gene28002:100196336	NM_001141365.1	NP_001134837.1	commd7	FALSE	FALSE	COMM domain containing 7	202	1172	1	protein_coding	XP_021420082.1	gi|213513718|ref|NP_001134837.1|	89.5	200	3	1	1	182	1	200	2e-99	360	XP_021420082.1COMMdomain-containingprotein7isoformX1[Oncorhynchusmykiss]	XP_021420082.1COMMdomain-containingprotein7isoformX1[Oncorhynchusmykiss]	2	2	2		1	2	2	2	2	2	2	2	2	2	2	2	2	2	2	2	2	2	2	2
XP_021420083.1	gene50776:106589290	XM_014179068.1	XP_014034543.1	LOC106589290	FALSE	FALSE	pyridoxine-5'-phosphate oxidase-like	277	1696	1	protein_coding	XP_021420083.1	gi|929313538|ref|XP_014034543.1|	82.67	277	33	1	1	262	1	277	3e-136	483	XP_021420083.1pyridoxine-5'-phosphateoxidaseisoformX1[Oncorhynchusmykiss];XP_021431722.1pyridoxine-5'-phosphateoxidase-like[Oncorhynchusmykiss]	XP_021420083.1pyridoxine-5'-phosphateoxidaseisoformX1[Oncorhynchusmykiss];XP_021431722.1pyridoxine-5'-phosphateoxidase-like[Oncorhynchusmykiss]	2;1	2;1	2;1	;	2	2	2	2	2	2	2	2	2	1	2	2	2	2	2	2	2	2	2	2
XP_021420128.1	gene21556:100196521	NM_001141550.1	NP_001135022.1	pgdh	FALSE	FALSE	15-hydroxyprostaglandin dehydrogenase	270	1217	1	protein_coding	XP_021420128.1	gi|213514912|ref|NP_001135022.1|	95.93	270	11	0	1	270	1	270	1e-149	527	XP_021420128.115-hydroxyprostaglandindehydrogenase[NAD(+)]-like[Oncorhynchusmykiss];XP_021420121.115-hydroxyprostaglandindehydrogenase[NAD(+)]-like[Oncorhynchusmykiss]	XP_021420128.115-hydroxyprostaglandindehydrogenase[NAD(+)]-like[Oncorhynchusmykiss];XP_021420121.115-hydroxyprostaglandindehydrogenase[NAD(+)]-like[Oncorhynchusmykiss]	14;14	14;14	14;14	;	2	14	14	14	13	12	13	12	13	14	13	11	11	12	11	13	12	13	12	13
XP_021420187.1	gene27413:106566383	XM_014134353.1	XP_013989828.1	LOC106566383	FALSE	FALSE	alpha-enolase	432	1842	1	protein_coding	XP_021420187.1	gi|929226842|ref|XP_013989826.1|	94.67	413	9	3	1	401	1	412	0	788	XP_021420187.1alpha-enolase-like[Oncorhynchusmykiss];XP_021427639.1gamma-enolaseisoformX3[Oncorhynchusmykiss];XP_021427637.1gamma-enolaseisoformX3[Oncorhynchusmykiss];XP_021427636.1gamma-enolaseisoformX2[Oncorhynchusmykiss];XP_021427635.1gamma-enolaseisoformX1[Oncorhynchusmykiss];XP_021479166.1gamma-enolase-like[Oncorhynchusmykiss]	XP_021420187.1alpha-enolase-like[Oncorhynchusmykiss]	21;3;3;3;3;1	1;0;0;0;0;0	1;0;0;0;0;0		6	21	1	1	21	19	21	19	20	20	21	20	20	20	20	1	1	1	1	1
XP_021420238.1	gene39831:106578745	XM_014157878.1	XP_014013353.1	LOC106578745	FALSE	FALSE	nidogen-1-like	1216	5138	1	protein_coding	XP_021420238.1	gi|929273364|ref|XP_014013353.1|	96.8	1217	38	1	1	1217	1	1216	0	2433	XP_021420238.1nidogen-1[Oncorhynchusmykiss]	XP_021420238.1nidogen-1[Oncorhynchusmykiss]	2	2	2		1	2	2	2	1	0	1	0	1	0	2	1	1	1	1	1	0	1	0	1
XP_021420241.1	gene61895:106591551	XM_014182769.1	XP_014038244.1	LOC106591551	FALSE	TRUE	microfibril-associated glycoprotein 4-like	237	1355	1	protein_coding	XP_021420241.1	gi|929324685|ref|XP_014038244.1|	94.51	237	13	0	1	237	1	237	2e-134	476	XP_021420241.1microfibril-associatedglycoprotein4-like[Oncorhynchusmykiss]	XP_021420241.1microfibril-associatedglycoprotein4-like[Oncorhynchusmykiss]	2	2	2		1	2	2	2	2	1	1	1	0	2	0	0	0	0	0	2	1	1	1	0
XP_021420244.1	gene21493:100380620	NM_001173905.1	NP_001167376.1	sat2	FALSE	FALSE	spermidine/spermine N1-acetyltransferase family member 2	173	950	1	protein_coding	XP_021420244.1	gi|291190478|ref|NP_001167376.1|	94.8	173	9	0	1	173	1	173	2e-95	346	XP_021420244.1diamineacetyltransferase2-likeisoformX2[Oncorhynchusmykiss];XP_021420237.1diamineacetyltransferase2-likeisoformX1[Oncorhynchusmykiss]	XP_021420244.1diamineacetyltransferase2-likeisoformX2[Oncorhynchusmykiss];XP_021420237.1diamineacetyltransferase2-likeisoformX1[Oncorhynchusmykiss]	3;3	3;3	3;3	;	2	3	3	3	3	3	3	3	2	3	3	3	2	3	3	3	3	3	3	2
XP_021420245.1	gene39846:106578758	XM_014157904.1	XP_014013379.1	LOC106578758	FALSE	FALSE	peptidyl-prolyl cis-trans isomerase A-like	196	1354	1	protein_coding	XP_021420245.1	gi|929273410|ref|XP_014013379.1|	97.45	196	5	0	1	196	1	196	4e-110	395	XP_021420245.1peptidyl-prolylcis-transisomeraseA-like[Oncorhynchusmykiss]	XP_021420245.1peptidyl-prolylcis-transisomeraseA-like[Oncorhynchusmykiss]	3	2	2		1	3	2	2	3	3	3	3	3	2	3	3	3	2	3	2	2	2	2	2
XP_021420253.1	gene39869:106578779	XM_014157936.1	XP_014013411.1	LOC106578779	FALSE	FALSE	protein MEMO1	297	1929	1	protein_coding	XP_021420253.1	gi|929273464|ref|XP_014013411.1|	99.33	297	2	0	1	297	1	297	6e-178	622	XP_021420253.1proteinMEMO1[Oncorhynchusmykiss];XP_021432333.1proteinMEMO1-like[Oncorhynchusmykiss]	XP_021420253.1proteinMEMO1[Oncorhynchusmykiss];XP_021432333.1proteinMEMO1-like[Oncorhynchusmykiss]	5;3	5;3	5;3	;	2	5	5	5	3	4	4	4	4	5	4	5	4	5	5	3	4	4	4	4
XP_021420264.1	gene21492:106560679	XM_014123786.1	XP_013979261.1	LOC106560679	FALSE	FALSE	ATP synthase subunit g, mitochondrial-like	103	498	1	protein_coding	XP_021420264.1	gi|929123263|ref|XP_013979261.1|	100	103	0	0	1	103	1	103	8e-55	210	XP_021420264.1ATPsynthasesubunitg,mitochondrial-like[Oncorhynchusmykiss]	XP_021420264.1ATPsynthasesubunitg,mitochondrial-like[Oncorhynchusmykiss]	5	5	2		1	5	5	2	4	4	4	4	4	4	5	5	5	5	5	4	4	4	4	4
XP_021420276.1	gene70633:106593566	XM_014184916.1	XP_014040391.1	LOC106593566	FALSE	TRUE	tripartite motif-containing protein 16-like	553	1880	1	protein_coding	XP_021420276.1	gi|929330042|ref|XP_014040391.1|	92.56	430	31	1	1	429	1	430	0	789	XP_021420276.1tripartitemotif-containingprotein16-like[Oncorhynchusmykiss];XP_021450401.1tripartitemotif-containingprotein16-like[Oncorhynchusmykiss];XP_021449271.1tripartitemotif-containingprotein16-like[Oncorhynchusmykiss];XP_021448506.1tripartitemotif-containingprotein16-like[Oncorhynchusmykiss];XP_021449079.1tripartitemotif-containingprotein16-like[Oncorhynchusmykiss];XP_021448803.1tripartite…	XP_021420276.1tripartitemotif-containingprotein16-like[Oncorhynchusmykiss];XP_021450401.1tripartitemotif-containingprotein16-like[Oncorhynchusmykiss];XP_021449271.1tripartitemotif-containingprotein16-like[Oncorhynchusmykiss];XP_021448506.1tripartitemotif-containingprotein16-like[Oncorhynchusmykiss];XP_021449079.1tripartitemotif-containingprotein16-like[Oncorhynchusmykiss];XP_021448803.1tripartite…	4;4;4;4;4;4;4;3;3;3;3;3;3;3;3;3;3;3;2;2;2;2;2;2;2;2;2;2;2;1;1;1;1;1	4;4;4;4;4;4;4;3;3;3;3;3;3;3;3;3;3;3;2;2;2;2;2;2;2;2;2;2;2;1;1;1;1;1	4;4;4;4;4;4;4;3;3;3;3;3;3;3;3;3;3;3;2;2;2;2;2;2;2;2;2;2;2;1;1;1;1;1	;;;;;;;;;;;;;;;;;;;;;;;;;;;;	34	4	4	4	3	3	3	1	2	3	4	3	3	3	3	3	3	3	1	2
XP_021420297.1	gene39912:106578809	XM_014157980.1	XP_014013455.1	LOC106578809	FALSE	FALSE	nucleolar and coiled-body phosphoprotein 1-like	1106	4719	1	protein_coding	XP_021420297.1	gi|929273545|ref|XP_014013456.1|	81.87	717	60	10	347	1018	414	1105	4e-145	515	XP_021420297.1nucleolarandcoiled-bodyphosphoprotein1isoformX6[Oncorhynchusmykiss];XP_021420296.1nucleolarandcoiled-bodyphosphoprotein1isoformX5[Oncorhynchusmykiss];XP_021420295.1nucleolarandcoiled-bodyphosphoprotein1isoformX4[Oncorhynchusmykiss];XP_021420294.1nucleolarandcoiled-bodyphosphoprotein1isoformX3[Oncorhynchusmykiss];XP_021420293.1nucleolarandcoiled-bodyphosphoprotein1isoformX2[Oncorhync…	XP_021420297.1nucleolarandcoiled-bodyphosphoprotein1isoformX6[Oncorhynchusmykiss];XP_021420296.1nucleolarandcoiled-bodyphosphoprotein1isoformX5[Oncorhynchusmykiss];XP_021420295.1nucleolarandcoiled-bodyphosphoprotein1isoformX4[Oncorhynchusmykiss];XP_021420294.1nucleolarandcoiled-bodyphosphoprotein1isoformX3[Oncorhynchusmykiss];XP_021420293.1nucleolarandcoiled-bodyphosphoprotein1isoformX2[Oncorhync…	2;2;2;2;2;2	2;2;2;2;2;2	2;2;2;2;2;2	;;;;;	6	2	2	2	2	2	1	2	2	2	2	2	2	1	2	2	2	1	2	2
XP_021420299.1	gene39916:106578810	XM_014157984.1	XP_014013459.1	LOC106578810	FALSE	FALSE	prosaposin-like	529	3124	1	protein_coding	XP_021420299.1	gi|929273551|ref|XP_014013459.1|	87.8	533	57	3	1	529	1	529	0	939	XP_021420299.1prosaposin-likeisoformX2[Oncorhynchusmykiss];XP_021420298.1prosaposin-likeisoformX1[Oncorhynchusmykiss]	XP_021420299.1prosaposin-likeisoformX2[Oncorhynchusmykiss];XP_021420298.1prosaposin-likeisoformX1[Oncorhynchusmykiss]	8;8	3;3	3;3	;	2	8	3	3	7	7	7	7	7	8	7	7	7	7	7	2	2	2	2	2
XP_021420319.1	gene39944:100195813	NM_001140842.1	NP_001134314.1	pno1	FALSE	FALSE	partner of NOB1 homolog	250	1282	1	protein_coding	XP_021420319.1	gi|213511586|ref|NP_001134314.1|	99.2	250	2	0	1	250	1	250	3e-144	509	XP_021420319.1RNA-bindingproteinPNO1[Oncorhynchusmykiss]	XP_021420319.1RNA-bindingproteinPNO1[Oncorhynchusmykiss]	2	2	2		1	2	2	2	1	1	0	1	1	2	1	0	1	2	0	1	1	0	1	1
XP_021420328.1	gene39950:106578844	XM_014158049.1	XP_014013524.1	LOC106578844	FALSE	FALSE	RPE-retinal G protein-coupled receptor-like	296	3367	1	protein_coding	XP_021420328.1	gi|929273669|ref|XP_014013524.1|	93.23	251	17	0	1	251	46	296	3e-140	496	XP_021420328.1RPE-retinalGprotein-coupledreceptor-likeisoformX2[Oncorhynchusmykiss];XP_021420327.1RPE-retinalGprotein-coupledreceptor-likeisoformX1[Oncorhynchusmykiss];XP_021420326.1RPE-retinalGprotein-coupledreceptor-likeisoformX1[Oncorhynchusmykiss]	XP_021420328.1RPE-retinalGprotein-coupledreceptor-likeisoformX2[Oncorhynchusmykiss];XP_021420327.1RPE-retinalGprotein-coupledreceptor-likeisoformX1[Oncorhynchusmykiss];XP_021420326.1RPE-retinalGprotein-coupledreceptor-likeisoformX1[Oncorhynchusmykiss]	4;4;4	4;4;4	4;4;4	;;	3	4	4	4	4	4	4	4	4	4	4	4	4	4	4	4	4	4	4	4
XP_021420369.1	gene39990:106578881	XM_014158116.1	XP_014013591.1	LOC106578881	FALSE	FALSE	uncharacterized protein C17orf62 homolog	206	1557	1	protein_coding	XP_021420369.1	gi|929273803|ref|XP_014013592.1|	98.52	203	1	1	1	203	1	201	2e-107	387	XP_021420369.1uncharacterizedproteinC17orf62homolog[Oncorhynchusmykiss];XP_021420368.1uncharacterizedproteinC17orf62homolog[Oncorhynchusmykiss];XP_021431316.1uncharacterizedproteinLOC110498922isoformX6[Oncorhynchusmykiss];XP_021431314.1uncharacterizedproteinC17orf62homologisoformX4[Oncorhynchusmykiss];XP_021431313.1uncharacterizedproteinC17orf62homologisoformX3[Oncorhynchusmykiss];XP_021431312.1u…	XP_021420369.1uncharacterizedproteinC17orf62homolog[Oncorhynchusmykiss];XP_021420368.1uncharacterizedproteinC17orf62homolog[Oncorhynchusmykiss];XP_021431316.1uncharacterizedproteinLOC110498922isoformX6[Oncorhynchusmykiss];XP_021431314.1uncharacterizedproteinC17orf62homologisoformX4[Oncorhynchusmykiss];XP_021431313.1uncharacterizedproteinC17orf62homologisoformX3[Oncorhynchusmykiss];XP_021431312.1u…	2;2;1;1;1;1;1	2;2;1;1;1;1;1	2;2;1;1;1;1;1	;;;;;;	7	2	2	2	2	1	2	2	2	2	1	1	2	2	2	2	1	2	2	2
XP_021420385.1	gene40010:106578890	XM_014158126.1	XP_014013601.1	LOC106578890	FALSE	FALSE	snaclec 1-like	167	1120	1	protein_coding	XP_021420385.1	gi|929273818|ref|XP_014013601.1|	91.02	167	15	0	1	167	1	167	1e-78	290	XP_021420385.1alpha-N-acetylgalactosamine-specificlectin-like[Oncorhynchusmykiss]	XP_021420385.1alpha-N-acetylgalactosamine-specificlectin-like[Oncorhynchusmykiss]	4	4	4		1	4	4	4	3	4	3	4	2	3	3	4	2	3	4	3	4	3	4	2
XP_021420412.1	gene40029:100136533	XM_014158174.1	XP_014013649.1	gdh2	FALSE	TRUE	glutamate dehydrogenase	539	3199	1	protein_coding	XP_021420412.1	gi|929273912|ref|XP_014013649.1|	99.44	539	3	0	1	539	1	539	0	1119	XP_021420412.1glutamatedehydrogenase,mitochondrial[Oncorhynchusmykiss]	XP_021420412.1glutamatedehydrogenase,mitochondrial[Oncorhynchusmykiss]	23	13	10		1	23	13	10	23	23	22	23	22	22	21	23	21	23	23	13	13	13	13	12
XP_021420436.1	gene40058:106578952	XM_014158259.1	XP_014013734.1	LOC106578952	FALSE	FALSE	APOBEC1 complementation factor-like	594	2097	1	protein_coding	XP_021420436.1	gi|929274075|ref|XP_014013737.1|	97.95	537	11	0	1	537	1	537	0	1015	XP_021420436.1APOBEC1complementationfactor-likeisoformX2[Oncorhynchusmykiss];XP_021420435.1APOBEC1complementationfactor-likeisoformX1[Oncorhynchusmykiss];XP_021420437.1APOBEC1complementationfactor-likeisoformX3[Oncorhynchusmykiss]	XP_021420436.1APOBEC1complementationfactor-likeisoformX2[Oncorhynchusmykiss];XP_021420435.1APOBEC1complementationfactor-likeisoformX1[Oncorhynchusmykiss];XP_021420437.1APOBEC1complementationfactor-likeisoformX3[Oncorhynchusmykiss]	18;18;18	5;5;5	5;5;5	;;	3	18	5	5	16	13	15	14	15	16	13	14	15	14	14	4	3	3	4	4
XP_021420438.1	gene40061:100195300	NM_001140329.1	NP_001133801.1	paps2	FALSE	FALSE	Bifunctional 3-phosphoadenosine 5-phosphosulfate synthetase 2	614	2554	1	protein_coding	XP_021420438.1	gi|213511344|ref|NP_001133801.1|	99.35	614	4	0	1	614	1	614	0	1271	XP_021420438.1bifunctional3'-phosphoadenosine5'-phosphosulfatesynthase2-like[Oncorhynchusmykiss]	XP_021420438.1bifunctional3'-phosphoadenosine5'-phosphosulfatesynthase2-like[Oncorhynchusmykiss]	13	13	9		1	13	13	9	11	11	11	11	11	11	12	11	10	9	12	11	11	11	11	11
XP_021420456.1	gene40064:106578957	XM_014158280.1	XP_014013755.1	rnls	FALSE	FALSE	renalase, FAD-dependent amine oxidase	430	2744	1	protein_coding	XP_021420456.1	gi|929274109|ref|XP_014013756.1|	97.96	343	6	1	1	342	1	343	0	697	XP_021420456.1renalaseisoformX2[Oncorhynchusmykiss];XP_021420454.1renalaseisoformX1[Oncorhynchusmykiss]	XP_021420456.1renalaseisoformX2[Oncorhynchusmykiss];XP_021420454.1renalaseisoformX1[Oncorhynchusmykiss]	3;3	3;3	3;3	;	2	3	3	3	3	2	3	3	3	3	2	3	3	2	3	3	2	3	3	3
XP_021420459.1	gene40065:106578958	XM_014158282.1	XP_014013757.1	LOC106578958	FALSE	FALSE	lysosomal acid lipase/cholesteryl ester hydrolase-like	443	2286	1	protein_coding	XP_021420459.1	gi|929274111|ref|XP_014013757.1|	97.25	400	9	1	1	400	46	443	0	816	XP_021420459.1lysosomalacidlipase/cholesterylesterhydrolase-like[Oncorhynchusmykiss]	XP_021420459.1lysosomalacidlipase/cholesterylesterhydrolase-like[Oncorhynchusmykiss]	4	2	2		1	4	2	2	3	3	3	3	2	2	3	4	3	3	3	1	1	1	1	0
XP_021420464.1	gene40041:106578933	XM_014158211.1	XP_014013686.1	LOC106578933	FALSE	FALSE	protein phosphatase 1B-like	389	3701	1	protein_coding	XP_021420464.1	gi|929273986|ref|XP_014013688.1|	100	380	0	0	1	380	1	380	0	781	XP_021420464.1proteinphosphatase1B-like[Oncorhynchusmykiss];XP_021420463.1proteinphosphatase1B-like[Oncorhynchusmykiss]	XP_021420464.1proteinphosphatase1B-like[Oncorhynchusmykiss];XP_021420463.1proteinphosphatase1B-like[Oncorhynchusmykiss]	7;7	3;3	3;3	;	2	7	3	3	7	7	6	7	6	6	7	7	7	6	7	3	3	2	3	2
XP_021420535.1	gene21570:106560785	XM_014124048.1	XP_013979523.1	wdr61	FALSE	FALSE	WD repeat domain 61	305	1514	1	protein_coding	XP_021420535.1	gi|929123764|ref|XP_013979523.1|	99.67	305	1	0	1	305	1	305	5e-177	619	XP_021420535.1WDrepeat-containingprotein61[Oncorhynchusmykiss]	XP_021420535.1WDrepeat-containingprotein61[Oncorhynchusmykiss]	4	4	4		1	4	4	4	4	3	4	4	3	3	3	3	3	4	3	4	3	4	4	3
XP_021420546.1	gene40111:100500786	XM_014158368.1	XP_014013843.1	LOC100500786	FALSE	FALSE	arginase-1	338	3013	1	protein_coding	XP_021420546.1	gi|929274277|ref|XP_014013843.1|	95.86	338	14	0	1	338	1	338	0	675	XP_021420546.1arginase-1[Oncorhynchusmykiss]	XP_021420546.1arginase-1[Oncorhynchusmykiss]	9	9	3		1	9	9	3	9	8	9	9	9	8	8	8	8	9	9	9	8	9	9	9
XP_021420592.1	gene21575:106560782	XM_014124037.1	XP_013979512.1	psma4	FALSE	FALSE	proteasome subunit alpha 4	282	993	1	protein_coding	XP_021420592.1	gi|929123744|ref|XP_013979512.1|	99.58	237	1	0	1	237	46	282	6e-138	488	XP_021420592.1proteasomesubunitalphatype-4isoformX2[Oncorhynchusmykiss];XP_021420584.1proteasomesubunitalphatype-4isoformX2[Oncorhynchusmykiss];XP_021463601.1proteasomesubunitalphatype-4-likeisoformX1[Oncorhynchusmykiss];XP_021420576.1proteasomesubunitalphatype-4isoformX1[Oncorhynchusmykiss];XP_021420567.1proteasomesubunitalphatype-4isoformX1[Oncorhynchusmykiss];XP_021463602.1proteasomesubunitalp…	XP_021420592.1proteasomesubunitalphatype-4isoformX2[Oncorhynchusmykiss];XP_021420584.1proteasomesubunitalphatype-4isoformX2[Oncorhynchusmykiss];XP_021463601.1proteasomesubunitalphatype-4-likeisoformX1[Oncorhynchusmykiss];XP_021420576.1proteasomesubunitalphatype-4isoformX1[Oncorhynchusmykiss];XP_021420567.1proteasomesubunitalphatype-4isoformX1[Oncorhynchusmykiss];XP_021463602.1proteasomesubunitalp…	7;7;7;7;7;6;6	7;7;7;7;7;6;6	7;7;7;7;7;6;6	;;;;;;	7	7	7	7	7	6	7	7	6	7	6	7	7	7	6	7	6	7	7	6
XP_021420612.1	gene40157:106579032	XM_014158462.1	XP_014013937.1	LOC106579032	FALSE	FALSE	granulins-like	838	4152	1	protein_coding	XP_021420612.1	gi|929274460|ref|XP_014013937.1|	79.26	757	127	9	12	751	95	838	0	1141	XP_021420612.1granulins-likeisoformX2[Oncorhynchusmykiss];XP_021420611.1granulins-likeisoformX1[Oncorhynchusmykiss]	XP_021420612.1granulins-likeisoformX2[Oncorhynchusmykiss];XP_021420611.1granulins-likeisoformX1[Oncorhynchusmykiss]	3;3	3;3	3;3	;	2	3	3	3	3	3	3	3	3	3	3	3	3	3	3	3	3	3	3	3
XP_021420624.1	gene40163:100195185	NM_001140214.1	NP_001133686.1	aarsd1	FALSE	TRUE	alanyl-tRNA synthetase domain containing 1	408	1784	1	protein_coding	XP_021420624.1	gi|213515028|ref|NP_001133686.1|	98.53	408	6	0	1	408	1	408	0	832	XP_021420624.1alanyl-tRNAeditingproteinAarsd1[Oncorhynchusmykiss]	XP_021420624.1alanyl-tRNAeditingproteinAarsd1[Oncorhynchusmykiss]	3	3	3		1	3	3	3	1	2	1	1	3	2	3	3	3	3	3	1	2	1	1	3
XP_021420631.1	gene40166:100195835	XM_014158502.1	XP_014013977.1	psme3	FALSE	FALSE	proteasome activator subunit 3	266	1496	1	protein_coding	XP_021420631.1	gi|929274536|ref|XP_014013979.1|	87.8	246	5	1	1	221	1	246	4e-120	429	XP_021420631.1proteasomeactivatorcomplexsubunit3-likeisoformX3[Oncorhynchusmykiss];XP_021420630.1proteasomeactivatorcomplexsubunit3-likeisoformX2[Oncorhynchusmykiss];XP_021431620.1proteasomeactivatorcomplexsubunit3-like[Oncorhynchusmykiss];XP_021420629.1proteasomeactivatorcomplexsubunit3-likeisoformX1[Oncorhynchusmykiss]	XP_021420631.1proteasomeactivatorcomplexsubunit3-likeisoformX3[Oncorhynchusmykiss];XP_021420630.1proteasomeactivatorcomplexsubunit3-likeisoformX2[Oncorhynchusmykiss];XP_021431620.1proteasomeactivatorcomplexsubunit3-like[Oncorhynchusmykiss];XP_021420629.1proteasomeactivatorcomplexsubunit3-likeisoformX1[Oncorhynchusmykiss]	2;2;2;2	2;2;2;2	1;1;1;1	;;;	4	2	2	1	2	2	2	2	2	2	2	2	2	2	2	2	2	2	2	2
XP_021420660.1	gene40192:100194529	NM_001139615.1	NP_001133087.1	cdk5rap3	FALSE	FALSE	CDK5 regulatory subunit associated protein 3	505	1694	1	protein_coding	XP_021420660.1	gi|213515572|ref|NP_001133087.1|	98.42	505	8	0	1	505	1	505	0	1026	XP_021420660.1CDK5regulatorysubunit-associatedprotein3[Oncorhynchusmykiss]	XP_021420660.1CDK5regulatorysubunit-associatedprotein3[Oncorhynchusmykiss]	3	3	3		1	3	3	3	3	3	3	3	3	2	3	3	3	3	3	3	3	3	3	3
XP_021420688.1	gene40205:106579308	XM_014159117.1	XP_014014592.1	LOC106579308	FALSE	FALSE	calcium-binding and coiled-coil domain-containing protein 2-like	646	2696	1	protein_coding	XP_021420688.1	gi|929275686|ref|XP_014014592.1|	93.34	646	41	1	1	644	1	646	0	1225	XP_021420688.1calcium-bindingandcoiled-coildomain-containingprotein2-like[Oncorhynchusmykiss];XP_021431733.1LOWQUALITYPROTEIN:tax1-bindingprotein1homolog[Oncorhynchusmykiss];XP_021441443.1tax1-bindingprotein1homologB-like[Oncorhynchusmykiss];XP_021428224.1tax1-bindingprotein1homologA-like[Oncorhynchusmykiss]	XP_021420688.1calcium-bindingandcoiled-coildomain-containingprotein2-like[Oncorhynchusmykiss];XP_021431733.1LOWQUALITYPROTEIN:tax1-bindingprotein1homolog[Oncorhynchusmykiss];XP_021441443.1tax1-bindingprotein1homologB-like[Oncorhynchusmykiss];XP_021428224.1tax1-bindingprotein1homologA-like[Oncorhynchusmykiss]	2;1;1;1	2;1;1;1	2;1;1;1	;;;	4	2	2	2	2	2	2	2	2	2	1	1	0	2	1	2	2	2	2	2
XP_021420713.1	gene40218:106579292	XM_014159080.1	XP_014014555.1	LOC106579292	FALSE	FALSE	acyl-CoA synthetase family member 2, mitochondrial-like	607	2992	1	protein_coding	XP_021420713.1	gi|929275617|ref|XP_014014556.1|	96.71	577	19	0	1	577	26	602	0	1150	XP_021420713.1acyl-CoAsynthetasefamilymember2,mitochondrialisoformX2[Oncorhynchusmykiss];XP_021420712.1acyl-CoAsynthetasefamilymember2,mitochondrialisoformX1[Oncorhynchusmykiss]	XP_021420713.1acyl-CoAsynthetasefamilymember2,mitochondrialisoformX2[Oncorhynchusmykiss];XP_021420712.1acyl-CoAsynthetasefamilymember2,mitochondrialisoformX1[Oncorhynchusmykiss]	7;7	6;6	6;6	;	2	7	6	6	7	7	7	7	7	6	6	7	7	7	7	6	6	6	6	6
XP_021420791.1	gene40272:106579249	XM_014158985.1	XP_014014460.1	LOC106579249	FALSE	FALSE	cytochrome c oxidase subunit 6B1-like	86	723	1	protein_coding	XP_021420791.1	gi|929275436|ref|XP_014014459.1|	98.84	86	1	0	1	86	1	86	3e-46	181	XP_021420791.1cytochromecoxidasesubunit6B1-like[Oncorhynchusmykiss]	XP_021420791.1cytochromecoxidasesubunit6B1-like[Oncorhynchusmykiss]	3	3	3		1	3	3	3	3	3	3	3	3	3	3	3	3	3	3	3	3	3	3	3
XP_021420795.1	gene40273:100380338	XM_014158540.1	XP_014014015.1	fam234a	FALSE	FALSE	family with sequence similarity 234, member A	545	1886	1	protein_coding	XP_021420795.1	gi|291190258|ref|NP_001167094.1|	97.61	545	13	0	1	545	1	545	0	1098	XP_021420795.1proteinFAM234A[Oncorhynchusmykiss];XP_021420794.1proteinFAM234A[Oncorhynchusmykiss]	XP_021420795.1proteinFAM234A[Oncorhynchusmykiss];XP_021420794.1proteinFAM234A[Oncorhynchusmykiss]	3;3	3;3	3;3	;	2	3	3	3	2	3	3	2	0	2	3	3	2	3	3	2	3	3	2	0
XP_021420798.1	gene21583:106560773	XM_014124010.1	XP_013979485.1	LOC106560773	FALSE	FALSE	sorting nexin-1-like	787	4929	1	protein_coding	XP_021420798.1	gi|929123692|ref|XP_013979485.1|	93.28	789	30	3	1	768	1	787	0	1431	XP_021420798.1sortingnexin-1-like[Oncorhynchusmykiss]	XP_021420798.1sortingnexin-1-like[Oncorhynchusmykiss]	13	13	10		1	13	13	10	11	10	10	10	11	9	10	11	10	6	10	11	10	10	10	11
XP_021420803.1	gene40278:106579241	XM_014158961.1	XP_014014436.1	LOC106579241	FALSE	FALSE	uncharacterized LOC106579241	547	3183	1	protein_coding	XP_021420803.1	gi|929275391|ref|XP_014014436.1|	86.22	537	65	5	1	533	1	532	0	897	XP_021420803.1uncharacterizedproteinLOC110491577isoformX3[Oncorhynchusmykiss];XP_021420802.1uncharacterizedproteinLOC110491577isoformX2[Oncorhynchusmykiss];XP_021420801.1uncharacterizedproteinLOC110491577isoformX1[Oncorhynchusmykiss]	XP_021420803.1uncharacterizedproteinLOC110491577isoformX3[Oncorhynchusmykiss];XP_021420802.1uncharacterizedproteinLOC110491577isoformX2[Oncorhynchusmykiss];XP_021420801.1uncharacterizedproteinLOC110491577isoformX1[Oncorhynchusmykiss]	2;2;2	2;2;2	2;2;2	;;	3	2	2	2	0	1	1	1	1	0	0	1	2	0	1	0	1	1	1	1
XP_021420810.1	gene21585:100195841	NM_001140870.1	NP_001134342.1	ppib	FALSE	FALSE	peptidylprolyl isomerase B (cyclophilin B)	216	985	1	protein_coding	XP_021420810.1	gi|213515060|ref|NP_001134342.1|	99.54	216	1	0	1	216	1	216	5e-121	432	XP_021420810.1peptidyl-prolylcis-transisomeraseB[Oncorhynchusmykiss]	XP_021420810.1peptidyl-prolylcis-transisomeraseB[Oncorhynchusmykiss]	10	10	10		1	10	10	10	10	10	10	10	10	10	10	10	9	10	10	10	10	10	10	10
XP_021420822.1	gene40287:100195216	XM_014158494.1	XP_014013969.1	phkg2	FALSE	FALSE	phosphorylase kinase, gamma 2 (testis)	390	2089	1	protein_coding	XP_021420822.1	gi|213515366|ref|NP_001133717.1|	99.74	390	1	0	1	390	1	390	0	807	XP_021420822.1phosphorylasebkinasegammacatalyticchain,liver/testisisoform-like[Oncorhynchusmykiss];XP_021420821.1phosphorylasebkinasegammacatalyticchain,liver/testisisoform-like[Oncorhynchusmykiss];XP_021420820.1phosphorylasebkinasegammacatalyticchain,liver/testisisoform-like[Oncorhynchusmykiss]	XP_021420822.1phosphorylasebkinasegammacatalyticchain,liver/testisisoform-like[Oncorhynchusmykiss];XP_021420821.1phosphorylasebkinasegammacatalyticchain,liver/testisisoform-like[Oncorhynchusmykiss];XP_021420820.1phosphorylasebkinasegammacatalyticchain,liver/testisisoform-like[Oncorhynchusmykiss]	2;2;2	2;2;2	2;2;2	;;	3	2	2	2	1	1	1	1	2	2	1	2	2	2	2	1	1	1	1	2
XP_021420827.1	gene40293:100380750	XM_014158934.1	XP_014014409.1	LOC100380750	FALSE	FALSE	3-phosphoinositide-dependent protein kinase 1	561	3884	1	protein_coding	XP_021420827.1	gi|929275340|ref|XP_014014409.1|	100	561	0	0	1	561	1	561	0	1169	XP_021420827.13-phosphoinositide-dependentproteinkinase1-like[Oncorhynchusmykiss];XP_021431192.13-phosphoinositide-dependentproteinkinase1-like[Oncorhynchusmykiss]	XP_021420827.13-phosphoinositide-dependentproteinkinase1-like[Oncorhynchusmykiss];XP_021431192.13-phosphoinositide-dependentproteinkinase1-like[Oncorhynchusmykiss]	2;2	2;2	2;2	;	2	2	2	2	2	2	2	2	2	2	2	2	2	2	2	2	2	2	2	2
XP_021420857.1	gene40312:106579212	XM_014158899.1	XP_014014374.1	LOC106579212	FALSE	FALSE	uncharacterized LOC106579212	928	4477	1	protein_coding	XP_021420857.1	gi|929275275|ref|XP_014014374.1|	98.92	928	10	0	1	928	1	928	0	1870	XP_021420857.1uncharacterizedproteinLOC110491612[Oncorhynchusmykiss]	XP_021420857.1uncharacterizedproteinLOC110491612[Oncorhynchusmykiss]	2	2	2		1	2	2	2	1	1	0	2	1	1	1	2	2	2	2	1	1	0	2	1
XP_021420865.1	gene40315:100195870	XM_014158505.1	XP_014013980.1	decr2	FALSE	FALSE	2,4-dienoyl CoA reductase 2, peroxisomal	300	1605	1	protein_coding	XP_021420865.1	gi|929274540|ref|XP_014013981.1|	96.99	299	9	0	1	299	1	299	1e-164	577	XP_021420865.1peroxisomal2,4-dienoyl-CoAreductaseisoformX2[Oncorhynchusmykiss];XP_021420864.1peroxisomal2,4-dienoyl-CoAreductaseisoformX1[Oncorhynchusmykiss];XP_021420863.1peroxisomal2,4-dienoyl-CoAreductaseisoformX1[Oncorhynchusmykiss]	XP_021420865.1peroxisomal2,4-dienoyl-CoAreductaseisoformX2[Oncorhynchusmykiss];XP_021420864.1peroxisomal2,4-dienoyl-CoAreductaseisoformX1[Oncorhynchusmykiss];XP_021420863.1peroxisomal2,4-dienoyl-CoAreductaseisoformX1[Oncorhynchusmykiss]	9;9;9	9;9;9	9;9;9	;;	3	9	9	9	8	7	6	8	8	8	6	7	8	7	7	8	7	6	8	8
XP_021420887.1	gene35058:106573920	XM_014149381.1	XP_014004856.1	LOC106573920	FALSE	FALSE	interferon-induced protein 44-like	444	2201	1	protein_coding	XP_021420887.1	gi|929256995|ref|XP_014004856.1|	96.85	444	14	0	1	444	1	444	0	904	XP_021420887.1interferon-inducedprotein44-likeisoformX2[Oncorhynchusmykiss];XP_021420806.1interferon-inducedprotein44-likeisoformX1[Oncorhynchusmykiss]	XP_021420887.1interferon-inducedprotein44-likeisoformX2[Oncorhynchusmykiss];XP_021420806.1interferon-inducedprotein44-likeisoformX1[Oncorhynchusmykiss]	5;5	5;5	4;4	;	2	5	5	4	5	5	5	5	5	5	5	5	5	3	5	5	5	5	5	5
XP_021420905.1	gene40339:106579189	XM_014158855.1	XP_014014330.1	nubp2	FALSE	FALSE	nucleotide binding protein 2	275	1153	1	protein_coding	XP_021420905.1	gi|929275201|ref|XP_014014333.1|	99.26	270	2	0	1	270	1	270	9e-155	545	XP_021420905.1cytosolicFe-SclusterassemblyfactorNUBP2[Oncorhynchusmykiss]	XP_021420905.1cytosolicFe-SclusterassemblyfactorNUBP2[Oncorhynchusmykiss]	3	3	3		1	3	3	3	2	3	3	3	2	2	3	2	2	3	3	2	3	3	3	2
XP_021420919.1	gene40349:106579180	XM_014158840.1	XP_014014315.1	LOC106579180	FALSE	FALSE	leucine-rich repeat-containing protein 4B-like	752	4384	1	protein_coding	XP_021420919.1	gi|929275167|ref|XP_014014314.1|	99.2	752	6	0	1	752	1	752	0	1544	XP_021420919.1leucine-richrepeat-containingprotein4B-like[Oncorhynchusmykiss];XP_021420918.1leucine-richrepeat-containingprotein4B-like[Oncorhynchusmykiss];XP_021420917.1leucine-richrepeat-containingprotein4B-like[Oncorhynchusmykiss]	XP_021420919.1leucine-richrepeat-containingprotein4B-like[Oncorhynchusmykiss];XP_021420918.1leucine-richrepeat-containingprotein4B-like[Oncorhynchusmykiss];XP_021420917.1leucine-richrepeat-containingprotein4B-like[Oncorhynchusmykiss]	3;3;3	3;3;3	3;3;3	;;	3	3	3	3	3	1	2	2	2	1	2	3	2	3	3	3	1	2	2	2
XP_021420922.1	gene21588:106560768	XM_014124003.1	XP_013979478.1	adpgk	FALSE	FALSE	ADP-dependent glucokinase	494	2160	1	protein_coding	XP_021420922.1	gi|929123678|ref|XP_013979479.1|	98.99	493	5	0	1	493	1	493	0	1004	XP_021420922.1ADP-dependentglucokinaseisoformX2[Oncorhynchusmykiss];XP_021420914.1ADP-dependentglucokinaseisoformX1[Oncorhynchusmykiss];XP_021420904.1ADP-dependentglucokinaseisoformX1[Oncorhynchusmykiss];XP_021420896.1ADP-dependentglucokinaseisoformX1[Oncorhynchusmykiss]	XP_021420922.1ADP-dependentglucokinaseisoformX2[Oncorhynchusmykiss];XP_021420914.1ADP-dependentglucokinaseisoformX1[Oncorhynchusmykiss];XP_021420904.1ADP-dependentglucokinaseisoformX1[Oncorhynchusmykiss];XP_021420896.1ADP-dependentglucokinaseisoformX1[Oncorhynchusmykiss]	2;2;2;2	2;2;2;2	2;2;2;2	;;;	4	2	2	2	2	2	2	2	2	2	2	1	2	2	2	2	2	2	2	2
XP_021420967.1	gene40375:106579158	XM_014158764.1	XP_014014239.1	vat1	FALSE	FALSE	vesicle amine transport 1	446	4286	1	protein_coding	XP_021420967.1	gi|929275032|ref|XP_014014239.1|	96.2	447	16	1	1	447	1	446	0	799	XP_021420967.1synapticvesiclemembraneproteinVAT-1homolog[Oncorhynchusmykiss]	XP_021420967.1synapticvesiclemembraneproteinVAT-1homolog[Oncorhynchusmykiss]	2	2	2		1	2	2	2	1	2	2	2	2	1	2	1	2	2	2	1	2	2	2	2
XP_021420986.1	gene40394:100194595	XM_014158480.1	XP_014013955.1	rpl19	FALSE	FALSE	ribosomal protein L19	197	904	1	protein_coding	XP_021420986.1	gi|929274494|ref|XP_014013955.1|	99.49	195	1	0	1	195	3	197	9e-107	384	XP_021420986.160SribosomalproteinL19isoformX2[Oncorhynchusmykiss];XP_021420985.160SribosomalproteinL19isoformX2[Oncorhynchusmykiss];XP_021480453.160SribosomalproteinL19-like[Oncorhynchusmykiss];XP_021420984.160SribosomalproteinL19isoformX1[Oncorhynchusmykiss];XP_021413333.160SribosomalproteinL19-like[Oncorhynchusmykiss]	XP_021420986.160SribosomalproteinL19isoformX2[Oncorhynchusmykiss];XP_021420985.160SribosomalproteinL19isoformX2[Oncorhynchusmykiss];XP_021480453.160SribosomalproteinL19-like[Oncorhynchusmykiss];XP_021420984.160SribosomalproteinL19isoformX1[Oncorhynchusmykiss];XP_021413333.160SribosomalproteinL19-like[Oncorhynchusmykiss]	2;2;2;2;2	2;2;2;2;2	2;2;2;2;2	;;;;	5	2	2	2	2	2	2	2	2	2	2	2	2	2	2	2	2	2	2	2
XP_021421009.1	gene40407:100195639	NM_001140668.1	NP_001134140.1	crp	FALSE	FALSE	c-reactive protein, pentraxin-related	231	962	1	protein_coding	XP_021421009.1	gi|213515122|ref|NP_001134140.1|	91.77	231	19	0	33	263	1	231	8e-123	438	XP_021421009.1C-reactiveprotein-like[Oncorhynchusmykiss]	XP_021421009.1C-reactiveprotein-like[Oncorhynchusmykiss]	5	5	5		1	5	5	5	5	4	5	5	4	5	3	5	4	5	5	5	4	5	5	4
XP_021421011.1	gene40408:106579134	XM_014158722.1	XP_014014197.1	naglu	FALSE	FALSE	N-acetylglucosaminidase, alpha	751	5502	1	protein_coding	XP_021421011.1	gi|929274955|ref|XP_014014197.1|	98.4	751	12	0	1	751	1	751	0	1537	XP_021421011.1alpha-N-acetylglucosaminidase[Oncorhynchusmykiss]	XP_021421011.1alpha-N-acetylglucosaminidase[Oncorhynchusmykiss]	3	3	3		1	3	3	3	3	2	3	3	1	3	2	2	2	3	3	3	2	3	3	1
XP_021421016.1	gene40410:106579131	XM_014158719.1	XP_014014194.1	coasy	FALSE	FALSE	CoA synthase	572	1987	1	protein_coding	XP_021421016.1	gi|929274951|ref|XP_014014195.1|	96.67	571	18	1	1	570	1	571	0	1053	XP_021421016.1bifunctionalcoenzymeAsynthaseisoformX4[Oncorhynchusmykiss];XP_021421015.1bifunctionalcoenzymeAsynthaseisoformX3[Oncorhynchusmykiss];XP_021421013.1bifunctionalcoenzymeAsynthaseisoformX2[Oncorhynchusmykiss];XP_021421012.1bifunctionalcoenzymeAsynthaseisoformX1[Oncorhynchusmykiss]	XP_021421016.1bifunctionalcoenzymeAsynthaseisoformX4[Oncorhynchusmykiss];XP_021421015.1bifunctionalcoenzymeAsynthaseisoformX3[Oncorhynchusmykiss];XP_021421013.1bifunctionalcoenzymeAsynthaseisoformX2[Oncorhynchusmykiss];XP_021421012.1bifunctionalcoenzymeAsynthaseisoformX1[Oncorhynchusmykiss]	3;3;3;3	3;3;3;3	3;3;3;3	;;;	4	3	3	3	3	2	2	3	3	3	2	2	2	2	3	3	2	2	3	3
XP_021421114.1	gene40474:106579083	XM_014158624.1	XP_014014099.1	LOC106579083	FALSE	FALSE	mitochondrial amidoxime-reducing component 1-like	330	1563	1	protein_coding	XP_021421114.1	gi|929274767|ref|XP_014014099.1|	99.09	330	3	0	1	330	1	330	0	682	XP_021421114.1mitochondrialamidoxime-reducingcomponent1-like[Oncorhynchusmykiss]	XP_021421114.1mitochondrialamidoxime-reducingcomponent1-like[Oncorhynchusmykiss]	5	4	4		1	5	4	4	5	4	3	5	5	4	4	5	5	5	5	4	3	2	4	4
XP_021421183.1	gene40497:100196690	NM_001141712.1	NP_001135184.1	pp1g	FALSE	FALSE	Serine/threonine-protein phosphatase PP1-gamma catalytic subunit	325	2070	1	protein_coding	XP_021421183.1	gi|213514806|ref|NP_001135184.1|	100	325	0	0	1	325	1	325	0	673	XP_021421183.1serine/threonine-proteinphosphatasealpha-2isoform-like[Oncorhynchusmykiss]	XP_021421183.1serine/threonine-proteinphosphatasealpha-2isoform-like[Oncorhynchusmykiss]	13	1	1		1	13	1	1	13	13	12	12	12	13	12	11	11	13	13	1	1	1	1	1
XP_021421211.1	gene40519:100286541	NM_001146480.1	NP_001139952.1	nif3l1	FALSE	FALSE	NIF3 NGG1 interacting factor 3-like 1	200	860	1	protein_coding	XP_021421211.1	gi|226442801|ref|NP_001139952.1|	94.12	153	9	0	1	153	1	153	1e-73	276	XP_021421211.1NIF3-likeprotein1[Oncorhynchusmykiss];XP_021421210.1NIF3-likeprotein1[Oncorhynchusmykiss]	XP_021421211.1NIF3-likeprotein1[Oncorhynchusmykiss];XP_021421210.1NIF3-likeprotein1[Oncorhynchusmykiss]	4;4	4;4	4;4	;	2	4	4	4	4	4	4	4	4	4	4	3	4	4	4	4	4	4	4	4
XP_021421241.1	gene40554:100380818	NM_001173940.1	NP_001167411.1	if3ei	FALSE	FALSE	Eukaryotic translation initiation factor 3 subunit E-interacting protein	576	2278	1	protein_coding	XP_021421241.1	gi|291190851|ref|NP_001167411.1|	99.83	576	1	0	1	576	1	576	0	1201	XP_021421241.1eukaryotictranslationinitiationfactor3subunitL-like[Oncorhynchusmykiss]	XP_021421241.1eukaryotictranslationinitiationfactor3subunitL-like[Oncorhynchusmykiss]	17	17	1		1	17	17	1	16	16	16	17	17	16	17	16	16	17	17	16	16	16	17	17
XP_021421264.1	gene40540:100380546	XM_014159244.1	XP_014014719.1	p5cs	FALSE	FALSE	Delta-1-pyrroline-5-carboxylate synthetase	780	2705	1	protein_coding	XP_021421264.1	gi|291190710|ref|NP_001167302.1|	99.36	780	3	1	1	778	1	780	0	1587	XP_021421264.1delta-1-pyrroline-5-carboxylatesynthase-likeisoformX2[Oncorhynchusmykiss];XP_021421263.1delta-1-pyrroline-5-carboxylatesynthase-likeisoformX1[Oncorhynchusmykiss];XP_021431607.1delta-1-pyrroline-5-carboxylatesynthase-likeisoformX3[Oncorhynchusmykiss];XP_021431606.1delta-1-pyrroline-5-carboxylatesynthase-likeisoformX2[Oncorhynchusmykiss];XP_021431605.1delta-1-pyrroline-5-carboxylatesy…	XP_021421264.1delta-1-pyrroline-5-carboxylatesynthase-likeisoformX2[Oncorhynchusmykiss];XP_021421263.1delta-1-pyrroline-5-carboxylatesynthase-likeisoformX1[Oncorhynchusmykiss]	13;13;5;5;5;5;5;3;3	13;13;5;5;5;5;5;3;3	13;13;5;5;5;5;5;3;3	;	9	13	13	13	11	13	12	11	10	13	12	11	11	12	13	11	13	12	11	10
XP_021421337.1	gene28446:106567354	XM_014136498.1	XP_013991973.1	LOC106567354	FALSE	FALSE	serine--tRNA ligase, cytoplasmic-like	513	2393	1	protein_coding	XP_021421337.1	gi|929230841|ref|XP_013991973.1|	99.03	513	5	0	1	513	1	513	0	1066	XP_021421337.1serine--tRNAligase,cytoplasmic-like[Oncorhynchusmykiss]	XP_021421337.1serine--tRNAligase,cytoplasmic-like[Oncorhynchusmykiss]	13	2	2		1	13	2	2	11	12	10	11	9	12	10	11	11	12	11	2	2	1	2	1
XP_021421378.1	gene21614:106560745	XM_014123943.1	XP_013979418.1	LOC106560745	FALSE	FALSE	mannose-6-phosphate isomerase-like	440	3052	1	protein_coding	XP_021421378.1	gi|929123554|ref|XP_013979418.1|	96.37	441	15	1	1	441	1	440	0	883	XP_021421378.1mannose-6-phosphateisomerase[Oncorhynchusmykiss]	XP_021421378.1mannose-6-phosphateisomerase[Oncorhynchusmykiss]	3	3	3		1	3	3	3	3	3	3	2	2	2	3	2	2	3	2	3	3	3	2	2
XP_021421390.1	gene21615:106560746	XM_014123944.1	XP_013979419.1	scamp2	FALSE	FALSE	secretory carrier membrane protein 2	331	4157	1	protein_coding	XP_021421390.1	gi|929123556|ref|XP_013979419.1|	98.49	331	5	0	1	331	1	331	0	674	XP_021421390.1secretorycarrier-associatedmembraneprotein2-like[Oncorhynchusmykiss];XP_021456872.1secretorycarrier-associatedmembraneprotein2-like[Oncorhynchusmykiss]	XP_021421390.1secretorycarrier-associatedmembraneprotein2-like[Oncorhynchusmykiss];XP_021456872.1secretorycarrier-associatedmembraneprotein2-like[Oncorhynchusmykiss]	2;1	2;1	2;1	;	2	2	2	2	1	2	2	2	2	2	1	1	1	1	2	1	2	2	2	2
XP_021421395.1	gene28068:106566965	XM_014135663.1	XP_013991138.1	LOC106566965	FALSE	FALSE	TAR DNA-binding protein 43-like	399	2915	1	protein_coding	XP_021421395.1	gi|929229279|ref|XP_013991138.1|	99.5	399	2	0	1	399	1	399	0	826	XP_021421395.1TARDNA-bindingprotein43-like[Oncorhynchusmykiss];XP_021471787.1TARDNA-bindingprotein43[Oncorhynchusmykiss]	XP_021421395.1TARDNA-bindingprotein43-like[Oncorhynchusmykiss];XP_021471787.1TARDNA-bindingprotein43[Oncorhynchusmykiss]	5;4	5;4	4;3	;	2	5	5	4	4	4	4	5	3	4	2	4	5	4	5	4	4	4	5	3
XP_021421397.1	gene28069:106566966	XM_014135664.1	XP_013991139.1	renbp	FALSE	FALSE	renin binding protein	404	2972	1	protein_coding	XP_021421397.1	gi|929229281|ref|XP_013991139.1|	99.26	404	3	0	1	404	1	404	0	839	XP_021421397.1N-acylglucosamine2-epimerase[Oncorhynchusmykiss];XP_021421396.1N-acylglucosamine2-epimerase[Oncorhynchusmykiss]	XP_021421397.1N-acylglucosamine2-epimerase[Oncorhynchusmykiss];XP_021421396.1N-acylglucosamine2-epimerase[Oncorhynchusmykiss]	2;2	2;2	2;2	;	2	2	2	2	2	2	2	2	1	2	2	2	1	1	2	2	2	2	2	1
XP_021421399.1	gene28074:100196358	NM_001141387.1	NP_001134859.1	dhpr	FALSE	FALSE	Dihydropteridine reductase	238	1395	1	protein_coding	XP_021421399.1	gi|213511208|ref|NP_001134859.1|	98.32	238	4	0	1	238	1	238	4e-135	479	XP_021421399.1dihydropteridinereductase-like[Oncorhynchusmykiss]	XP_021421399.1dihydropteridinereductase-like[Oncorhynchusmykiss]	5	5	5		1	5	5	5	5	4	4	3	2	5	3	2	3	3	5	5	4	4	3	2
XP_021421406.1	gene28076:106566972	XM_014135680.1	XP_013991155.1	LOC106566972	FALSE	FALSE	keratin, type I cytoskeletal 18-like	436	2138	1	protein_coding	XP_021421406.1	gi|929229310|ref|XP_013991155.1|	99.08	435	4	0	1	435	1	435	0	877	XP_021421406.1keratin,typeIcytoskeletal18-like[Oncorhynchusmykiss];XP_021424256.1keratin,typeIcytoskeletal18-like[Oncorhynchusmykiss];XP_021466271.1keratin,typeIcytoskeletal18-like[Oncorhynchusmykiss];CON__P05784	XP_021421406.1keratin,typeIcytoskeletal18-like[Oncorhynchusmykiss]	18;1;1;1	18;1;1;1	18;1;1;1		4	18	18	18	15	14	13	14	13	17	12	15	13	14	16	15	14	13	14	13
XP_021421482.1	gene28111:106567008	XM_014135773.1	XP_013991248.1	LOC106567008	FALSE	FALSE	prostaglandin E synthase 3-like	161	2660	1	protein_coding	XP_021421482.1	gi|929229477|ref|XP_013991248.1|	98.14	161	3	0	1	161	1	161	3e-88	322	XP_021421482.1prostaglandinEsynthase3-like[Oncorhynchusmykiss]	XP_021421482.1prostaglandinEsynthase3-like[Oncorhynchusmykiss]	3	3	3		1	3	3	3	3	3	2	2	2	3	3	3	2	2	2	3	3	2	2	2
XP_021421511.1	gene28125:106567025	XM_014135804.1	XP_013991279.1	LOC106567025	FALSE	FALSE	translocon-associated protein subunit delta-like	167	1350	1	protein_coding	XP_021421511.1	gi|929229541|ref|XP_013991279.1|	97.01	167	5	0	1	167	1	167	1e-93	340	XP_021421511.1translocon-associatedproteinsubunitdelta-like[Oncorhynchusmykiss]	XP_021421511.1translocon-associatedproteinsubunitdelta-like[Oncorhynchusmykiss]	4	1	1		1	4	1	1	4	3	4	3	4	3	3	4	3	4	4	1	0	1	0	1
XP_021421512.1	gene28130:106567026	XM_014135807.1	XP_013991282.1	LOC106567026	FALSE	FALSE	E3 ubiquitin-protein ligase HUWE1-like	4661	14364	1	protein_coding	XP_021421512.1	gi|929229579|ref|XP_013991299.1|	98.34	4635	63	7	1	4629	1	4627	0	8557	XP_021421512.1E3ubiquitin-proteinligaseHUWE1[Oncorhynchusmykiss]	XP_021421512.1E3ubiquitin-proteinligaseHUWE1[Oncorhynchusmykiss]	26	26	3		1	26	26	3	23	19	19	20	18	18	20	23	17	20	20	23	19	19	20	18
XP_021421515.1	gene28134:106567029	XM_014135833.1	XP_013991308.1	LOC106567029	FALSE	FALSE	structural maintenance of chromosomes protein 1A	1231	6022	1	protein_coding	XP_021421515.1	gi|929229595|ref|XP_013991308.1|	99.92	1231	1	0	1	1231	1	1231	0	2507	XP_021421515.1structuralmaintenanceofchromosomesprotein1A[Oncorhynchusmykiss];XP_021470129.1structuralmaintenanceofchromosomesprotein1A-like[Oncorhynchusmykiss]	XP_021421515.1structuralmaintenanceofchromosomesprotein1A[Oncorhynchusmykiss];XP_021470129.1structuralmaintenanceofchromosomesprotein1A-like[Oncorhynchusmykiss]	5;3	5;3	5;3	;	2	5	5	5	4	3	5	5	4	4	3	4	3	5	3	4	3	5	5	4
XP_021421556.1	gene28153:106567049	XM_014135880.1	XP_013991355.1	dnajc22	FALSE	FALSE	DnaJ (Hsp40) homolog, subfamily C, member 22	346	1739	1	protein_coding	XP_021421556.1	gi|929229679|ref|XP_013991355.1|	97.11	346	10	0	1	346	1	346	0	689	XP_021421556.1dnaJhomologsubfamilyCmember22[Oncorhynchusmykiss];XP_021421554.1dnaJhomologsubfamilyCmember22[Oncorhynchusmykiss]	XP_021421556.1dnaJhomologsubfamilyCmember22[Oncorhynchusmykiss];XP_021421554.1dnaJhomologsubfamilyCmember22[Oncorhynchusmykiss]	2;2	2;2	2;2	;	2	2	2	2	2	1	1	2	1	2	2	2	2	1	2	2	1	1	2	1
XP_021421557.1	gene28155:106567051	XM_014135884.1	XP_013991359.1	LOC106567051	FALSE	FALSE	40S ribosomal protein S26-like	116	508	1	protein_coding	XP_021421557.1	gi|929229685|ref|XP_013991359.1|	100	116	0	0	47	162	1	116	1e-63	240	XP_021421557.140SribosomalproteinS26-like[Oncorhynchusmykiss]	XP_021421557.140SribosomalproteinS26-like[Oncorhynchusmykiss]	4	4	1		1	4	4	1	4	4	4	4	4	4	4	4	4	4	4	4	4	4	4	4
XP_021421565.1	gene28160:106567055	XM_014135890.1	XP_013991365.1	LOC106567055	FALSE	FALSE	proliferation-associated protein 2G4-like	397	3142	1	protein_coding	XP_021421565.1	gi|929229697|ref|XP_013991365.1|	98.5	399	4	1	1	399	1	397	0	776	XP_021421565.1proliferation-associatedprotein2G4-like[Oncorhynchusmykiss]	XP_021421565.1proliferation-associatedprotein2G4-like[Oncorhynchusmykiss]	17	17	4		1	17	17	4	16	15	17	16	15	17	17	15	17	16	16	16	15	17	16	15
XP_021421567.1	gene28164:106567057	XM_014135894.1	XP_013991369.1	LOC106567057	FALSE	FALSE	low-density lipoprotein receptor-related protein 1-like	4563	16205	1	protein_coding	XP_021421567.1	gi|929229703|ref|XP_013991369.1|	98.29	4559	77	1	26	4584	6	4563	0	9198	XP_021421567.1low-densitylipoproteinreceptor-relatedprotein1-like[Oncorhynchusmykiss];XP_021424821.1low-densitylipoproteinreceptor-relatedprotein1-like[Oncorhynchusmykiss];XP_021466826.1LOWQUALITYPROTEIN:low-densitylipoproteinreceptor-relatedprotein1-like[Oncorhynchusmykiss]	XP_021421567.1low-densitylipoproteinreceptor-relatedprotein1-like[Oncorhynchusmykiss]	38;12;5	38;12;5	26;7;3		3	38	38	26	37	35	35	35	30	36	36	37	36	35	34	37	35	35	35	30
XP_021421617.1	gene28183:106567067	XM_014135922.1	XP_013991397.1	LOC106567067	FALSE	FALSE	chromobox protein homolog 5-like	202	1050	1	protein_coding	XP_021421617.1	gi|929229755|ref|XP_013991397.1|	99.5	202	1	0	1	202	1	202	9e-114	407	XP_021421617.1chromoboxproteinhomolog5-like[Oncorhynchusmykiss];XP_021472428.1chromoboxproteinhomolog5-like[Oncorhynchusmykiss];XP_021472427.1chromoboxproteinhomolog5-like[Oncorhynchusmykiss];XP_021472426.1chromoboxproteinhomolog5-like[Oncorhynchusmykiss]	XP_021421617.1chromoboxproteinhomolog5-like[Oncorhynchusmykiss];XP_021472428.1chromoboxproteinhomolog5-like[Oncorhynchusmykiss];XP_021472427.1chromoboxproteinhomolog5-like[Oncorhynchusmykiss];XP_021472426.1chromoboxproteinhomolog5-like[Oncorhynchusmykiss]	2;2;2;2	2;2;2;2	2;2;2;2	;;;	4	2	2	2	1	2	1	2	1	1	1	2	2	1	1	1	2	1	2	1
XP_021421635.1	gene28194:106567076	XM_014135944.1	XP_013991419.1	LOC106567076	FALSE	FALSE	phosphatidylinositol 5-phosphate 4-kinase type-2 gamma	415	3134	1	protein_coding	XP_021421635.1	gi|929229794|ref|XP_013991419.1|	99.52	415	2	0	1	415	1	415	0	860	XP_021421635.1phosphatidylinositol5-phosphate4-kinasetype-2gamma[Oncorhynchusmykiss];XP_021472406.1phosphatidylinositol5-phosphate4-kinasetype-2gamma-like[Oncorhynchusmykiss];XP_021424732.1phosphatidylinositol5-phosphate4-kinasetype-2gamma-like[Oncorhynchusmykiss];XP_021424731.1phosphatidylinositol5-phosphate4-kinasetype-2gamma-like[Oncorhynchusmykiss]	XP_021421635.1phosphatidylinositol5-phosphate4-kinasetype-2gamma[Oncorhynchusmykiss];XP_021472406.1phosphatidylinositol5-phosphate4-kinasetype-2gamma-like[Oncorhynchusmykiss]	6;4;1;1	6;4;1;1	6;4;1;1	;	4	6	6	6	6	5	4	5	5	5	3	4	4	5	5	6	5	4	5	5
XP_021421671.1	gene28218:106567096	XM_014135983.1	XP_013991458.1	LOC106567096	FALSE	FALSE	hepatocyte nuclear factor 4-alpha-like	464	2404	1	protein_coding	XP_021421671.1	gi|929229869|ref|XP_013991462.1|	98.67	451	6	0	1	451	1	451	0	934	XP_021421671.1hepatocytenuclearfactor4-alpha-likeisoformX5[Oncorhynchusmykiss];XP_021421670.1hepatocytenuclearfactor4-alpha-likeisoformX4[Oncorhynchusmykiss];XP_021421669.1hepatocytenuclearfactor4-alpha-likeisoformX3[Oncorhynchusmykiss];XP_021472382.1hepatocytenuclearfactor4-alpha-likeisoformX2[Oncorhynchusmykiss];XP_021421668.1hepatocytenuclearfactor4-alpha-likeisoformX2[Oncorhynchusmykiss];XP_0…	XP_021421671.1hepatocytenuclearfactor4-alpha-likeisoformX5[Oncorhynchusmykiss];XP_021421670.1hepatocytenuclearfactor4-alpha-likeisoformX4[Oncorhynchusmykiss];XP_021421669.1hepatocytenuclearfactor4-alpha-likeisoformX3[Oncorhynchusmykiss];XP_021472382.1hepatocytenuclearfactor4-alpha-likeisoformX2[Oncorhynchusmykiss];XP_021421668.1hepatocytenuclearfactor4-alpha-likeisoformX2[Oncorhynchusmykiss];XP_0…	2;2;2;2;2;2;2	2;2;2;2;2;2;2	2;2;2;2;2;2;2	;;;;;;	7	2	2	2	1	1	2	1	1	2	1	2	2	2	2	1	1	2	1	1
XP_021421679.1	gene28221:106567100	XM_014135994.1	XP_013991469.1	LOC106567100	FALSE	FALSE	adenosine deaminase-like	406	2049	1	protein_coding	XP_021421679.1	gi|929229883|ref|XP_013991469.1|	95.3	362	17	0	1	362	35	396	0	726	XP_021421679.1adenosinedeaminase[Oncorhynchusmykiss];XP_021472374.1adenosinedeaminase-like[Oncorhynchusmykiss]	XP_021421679.1adenosinedeaminase[Oncorhynchusmykiss];XP_021472374.1adenosinedeaminase-like[Oncorhynchusmykiss]	7;4	7;4	7;4	;	2	7	7	7	7	7	6	5	4	7	6	6	6	7	6	7	7	6	5	4
XP_021421680.1	gene21624:100316863	NM_001168519.1	NP_001161991.1	pdia3	FALSE	FALSE	protein disulfide isomerase family A, member 3	493	1503	1	protein_coding	XP_021421680.1	gi|270483825|ref|NP_001161991.1|	97.76	491	11	0	1	491	1	491	0	997	XP_021421680.1proteindisulfide-isomeraseA3-like[Oncorhynchusmykiss]	XP_021421680.1proteindisulfide-isomeraseA3-like[Oncorhynchusmykiss]	27	27	27		1	27	27	27	27	26	24	25	23	25	24	24	22	25	26	27	26	24	25	23
XP_021421804.1	gene28303:106567173	XM_014136177.1	XP_013991652.1	LOC106567173	FALSE	FALSE	uncharacterized LOC106567173	271	1439	1	protein_coding	XP_021421804.1	gi|929230223|ref|XP_013991652.1|	99.26	271	2	0	1	271	1	271	5e-156	548	XP_021421804.1uncharacterizedproteinLOC110492106[Oncorhynchusmykiss]	XP_021421804.1uncharacterizedproteinLOC110492106[Oncorhynchusmykiss]	2	2	2		1	2	2	2	1	1	1	2	2	1	2	2	2	1	2	1	1	1	2	2
XP_021421806.1	gene28306:106567176	XM_014136182.1	XP_013991657.1	LOC106567176	FALSE	FALSE	citrate synthase, mitochondrial	472	4727	1	protein_coding	XP_021421806.1	gi|929230233|ref|XP_013991657.1|	99.79	472	1	0	37	508	1	472	0	979	XP_021421806.1citratesynthase,mitochondrial-like[Oncorhynchusmykiss]	XP_021421806.1citratesynthase,mitochondrial-like[Oncorhynchusmykiss]	10	10	1		1	10	10	1	9	7	8	6	6	6	8	8	7	8	8	9	7	8	6	6
XP_021421816.1	gene21632:106561085	XM_014124708.1	XP_013980183.1	api5	FALSE	FALSE	apoptosis inhibitor 5	530	2368	1	protein_coding	XP_021421816.1	gi|929125038|ref|XP_013980183.1|	99.06	530	5	0	1	530	1	530	0	1072	XP_021421816.1apoptosisinhibitor5-like[Oncorhynchusmykiss]	XP_021421816.1apoptosisinhibitor5-like[Oncorhynchusmykiss]	8	8	5		1	8	8	5	6	7	7	7	5	5	7	7	8	7	6	6	7	7	7	5
XP_021421830.1	gene28321:106567190	XM_014136203.1	XP_013991678.1	spats2	FALSE	FALSE	spermatogenesis associated, serine-rich 2	499	4558	1	protein_coding	XP_021421830.1	gi|929230275|ref|XP_013991677.1|	97.19	499	14	0	1	499	1	499	0	932	XP_021421830.1spermatogenesis-associatedserine-richprotein2[Oncorhynchusmykiss];XP_021472201.1spermatogenesis-associatedserine-richprotein2-like[Oncorhynchusmykiss]	XP_021421830.1spermatogenesis-associatedserine-richprotein2[Oncorhynchusmykiss];XP_021472201.1spermatogenesis-associatedserine-richprotein2-like[Oncorhynchusmykiss]	2;1	2;1	2;1	;	2	2	2	2	2	2	0	2	1	2	1	2	0	0	1	2	2	0	2	1
XP_021421845.1	gene28337:106567201	XM_014136214.1	XP_013991689.1	LOC106567201	FALSE	FALSE	tyrosine-protein phosphatase non-receptor type 1-like	441	3477	1	protein_coding	XP_021421845.1	gi|929230299|ref|XP_013991689.1|	98.64	441	6	0	1	441	1	441	0	910	XP_021421845.1tyrosine-proteinphosphatasenon-receptortype1-like[Oncorhynchusmykiss]	XP_021421845.1tyrosine-proteinphosphatasenon-receptortype1-like[Oncorhynchusmykiss]	2	2	1		1	2	2	1	2	2	2	2	2	2	2	2	2	2	2	2	2	2	2	2
XP_021421881.1	gene28410:106567263	XM_014136363.1	XP_013991838.1	LOC106567263	FALSE	FALSE	cell division control protein 42 homolog	191	1892	1	protein_coding	XP_021421881.1	gi|929230584|ref|XP_013991837.1|	100	191	0	0	1	191	1	191	4e-110	395	XP_021421881.1celldivisioncontrolprotein42homologisoformX1[Oncorhynchusmykiss];XP_021472058.1celldivisioncontrolprotein42homologisoformX2[Oncorhynchusmykiss]	XP_021421881.1celldivisioncontrolprotein42homologisoformX1[Oncorhynchusmykiss];XP_021472058.1celldivisioncontrolprotein42homologisoformX2[Oncorhynchusmykiss]	5;5	1;1	0;0	;	2	5	1	0	4	4	4	4	4	4	4	3	5	3	3	1	0	0	0	0
XP_021421906.1	gene21638:106561081	XM_014124704.1	XP_013980179.1	LOC106561081	FALSE	FALSE	nucleobindin-2-like	446	2440	1	protein_coding	XP_021421906.1	gi|929125031|ref|XP_013980179.1|	96.64	446	15	0	1	446	1	446	0	863	XP_021421906.1nucleobindin-2-like[Oncorhynchusmykiss]	XP_021421906.1nucleobindin-2-like[Oncorhynchusmykiss]	10	10	7		1	10	10	7	9	9	8	10	10	9	9	7	9	9	8	9	9	8	10	10
XP_021421955.1	gene21640:106561079	XM_014124701.1	XP_013980176.1	LOC106561079	FALSE	FALSE	40S ribosomal protein S13	151	542	1	protein_coding	XP_021421955.1	gi|929125025|ref|XP_013980176.1|	100	151	0	0	15	165	1	151	1e-83	306	XP_021421955.140SribosomalproteinS13[Oncorhynchusmykiss]	XP_021421955.140SribosomalproteinS13[Oncorhynchusmykiss]	8	2	2		1	8	2	2	6	7	8	7	8	7	7	7	7	7	7	2	2	2	2	2
XP_021422053.1	gene27928:106566864	XM_014135368.1	XP_013990843.1	LOC106566864	FALSE	FALSE	dolichyl-diphosphooligosaccharide--protein glycosyltransferase 48 kDa subunit	466	1651	1	protein_coding	XP_021422053.1	gi|929228732|ref|XP_013990843.1|	98.93	466	5	0	32	497	1	466	0	949	XP_021422053.1dolichyl-diphosphooligosaccharide--proteinglycosyltransferase48kDasubunit-like[Oncorhynchusmykiss]	XP_021422053.1dolichyl-diphosphooligosaccharide--proteinglycosyltransferase48kDasubunit-like[Oncorhynchusmykiss]	15	15	8		1	15	15	8	15	15	15	15	15	15	15	15	15	15	15	15	15	15	15	15
XP_021422118.1	gene27963:106566833	XM_014135288.1	XP_013990763.1	LOC106566833	FALSE	TRUE	properdin-like	447	2383	1	protein_coding	XP_021422118.1	gi|929228587|ref|XP_013990763.1|	93.51	447	29	0	1	447	1	447	0	816	XP_021422118.1properdin[Oncorhynchusmykiss]	XP_021422118.1properdin[Oncorhynchusmykiss]	3	3	3		1	3	3	3	3	3	3	3	3	1	2	3	2	2	3	3	3	3	3	3
XP_021422189.1	gene33180:100194571	NM_001139657.1	NP_001133129.1	mapre1	FALSE	FALSE	microtubule-associated protein, RP/EB family, member 1	255	3080	1	protein_coding	XP_021422189.1	gi|213512054|ref|NP_001133129.1|	96.11	257	8	1	1	257	1	255	1e-143	508	XP_021422189.1microtubule-associatedproteinRP/EBfamilymember1-likeisoformX2[Oncorhynchusmykiss];XP_021422188.1microtubule-associatedproteinRP/EBfamilymember1-likeisoformX2[Oncorhynchusmykiss]	XP_021422189.1microtubule-associatedproteinRP/EBfamilymember1-likeisoformX2[Oncorhynchusmykiss];XP_021422188.1microtubule-associatedproteinRP/EBfamilymember1-likeisoformX2[Oncorhynchusmykiss]	2;2	1;1	0;0	;	2	2	1	0	2	2	2	2	2	2	2	2	2	2	1	1	1	1	1	1
XP_021422190.1	gene28007:106566799	XM_014135207.1	XP_013990682.1	LOC106566799	FALSE	FALSE	acetyl-coenzyme A synthetase, cytoplasmic-like	699	5806	1	protein_coding	XP_021422190.1	gi|929228438|ref|XP_013990682.1|	98.57	699	10	0	1	699	1	699	0	1437	XP_021422190.1acetyl-coenzymeAsynthetase,cytoplasmic-like[Oncorhynchusmykiss]	XP_021422190.1acetyl-coenzymeAsynthetase,cytoplasmic-like[Oncorhynchusmykiss]	5	3	1		1	5	3	1	5	4	5	4	5	4	4	4	4	4	4	3	3	3	3	3
XP_021422215.1	gene28026:106566777	XM_014135164.1	XP_013990639.1	LOC106566777	FALSE	FALSE	cAMP-dependent protein kinase type II-alpha regulatory subunit-like	396	3090	1	protein_coding	XP_021422215.1	gi|929228356|ref|XP_013990640.1|	99.49	395	2	0	1	395	1	395	0	806	XP_021422215.1cAMP-dependentproteinkinasetypeII-alpharegulatorysubunit-likeisoformX2[Oncorhynchusmykiss];XP_021422214.1cAMP-dependentproteinkinasetypeII-alpharegulatorysubunit-likeisoformX1[Oncorhynchusmykiss];XP_021466131.1cAMP-dependentproteinkinasetypeII-alpharegulatorysubunit-like[Oncorhynchusmykiss];XP_021426001.1cAMP-dependentproteinkinasetypeII-alpharegulatorysubunit-likeisoformX3[Oncorhyn…	XP_021422215.1cAMP-dependentproteinkinasetypeII-alpharegulatorysubunit-likeisoformX2[Oncorhynchusmykiss];XP_021422214.1cAMP-dependentproteinkinasetypeII-alpharegulatorysubunit-likeisoformX1[Oncorhynchusmykiss]	12;12;3;2;2;2;2;2;1;1	2;2;0;0;0;0;0;0;0;0	2;2;0;0;0;0;0;0;0;0	;	10	12	2	2	11	12	10	11	11	9	12	10	11	9	11	2	2	2	2	2
XP_021422218.1	gene28029:106566775	XM_014135160.1	XP_013990635.1	LOC106566775	FALSE	FALSE	aminomethyltransferase, mitochondrial-like	429	2532	1	protein_coding	XP_021422218.1	gi|929228346|ref|XP_013990635.1|	97.59	415	10	0	1	415	15	429	0	819	XP_021422218.1aminomethyltransferase,mitochondrial[Oncorhynchusmykiss]	XP_021422218.1aminomethyltransferase,mitochondrial[Oncorhynchusmykiss]	13	13	13		1	13	13	13	11	8	10	12	8	12	8	9	7	7	10	11	8	10	12	8
XP_021422221.1	gene21648:100196783	NM_001141805.1	NP_001135277.1	eki1	FALSE	FALSE	Ethanolamine kinase 1	360	2123	1	protein_coding	XP_021422221.1	gi|213511180|ref|NP_001135277.1|	97.78	360	8	0	1	360	1	360	0	738	XP_021422221.1ethanolaminekinase1-likeisoformX1[Oncorhynchusmykiss];XP_021422229.1ethanolaminekinase1-likeisoformX2[Oncorhynchusmykiss];XP_021422238.1ethanolaminekinase1-likeisoformX3[Oncorhynchusmykiss]	XP_021422221.1ethanolaminekinase1-likeisoformX1[Oncorhynchusmykiss];XP_021422229.1ethanolaminekinase1-likeisoformX2[Oncorhynchusmykiss];XP_021422238.1ethanolaminekinase1-likeisoformX3[Oncorhynchusmykiss]	9;7;6	9;7;6	9;7;6	;;	3	9	9	9	6	9	9	9	9	9	9	2	9	5	5	6	9	9	9	9
XP_021422235.1	gene27859:106566687	XM_014134967.1	XP_013990442.1	LOC106566687	FALSE	FALSE	transketolase-like	628	2575	1	protein_coding	XP_021422235.1	gi|929227988|ref|XP_013990442.1|	99.36	628	4	0	1	628	1	628	0	1307	XP_021422235.1transketolase-like[Oncorhynchusmykiss];XP_021470081.1transketolase-like[Oncorhynchusmykiss];XP_021466842.1transketolase-like[Oncorhynchusmykiss];XP_021424394.1transketolase-likeisoformX4[Oncorhynchusmykiss];XP_021424393.1transketolase-likeisoformX3[Oncorhynchusmykiss];XP_021424392.1transketolase-likeisoformX2[Oncorhynchusmykiss];XP_021424391.1transketolase-likeisoformX1[Oncorhynchus…	XP_021422235.1transketolase-like[Oncorhynchusmykiss];XP_021470081.1transketolase-like[Oncorhynchusmykiss];XP_021466842.1transketolase-like[Oncorhynchusmykiss];XP_021424394.1transketolase-likeisoformX4[Oncorhynchusmykiss];XP_021424393.1transketolase-likeisoformX3[Oncorhynchusmykiss];XP_021424392.1transketolase-likeisoformX2[Oncorhynchusmykiss];XP_021424391.1transketolase-likeisoformX1[Oncorhynchus…	2;1;1;1;1;1;1	2;1;1;1;1;1;1	2;1;1;1;1;1;1	;;;;;;	7	2	2	2	0	0	1	1	1	1	2	1	1	1	1	0	0	1	1	1
XP_021422259.1	gene27847:100196705	NM_001141727.1	NP_001135199.1	bpi	FALSE	FALSE	Bactericidal permeability-increasing protein	485	2335	1	protein_coding	XP_021422259.1	gi|213512576|ref|NP_001135199.1|	95.36	474	22	0	12	485	12	485	0	922	XP_021422259.1lipopolysaccharide-bindingprotein-like[Oncorhynchusmykiss]	XP_021422259.1lipopolysaccharide-bindingprotein-like[Oncorhynchusmykiss]	2	2	2		1	2	2	2	2	2	2	2	1	2	1	1	2	2	2	2	2	2	2	1
XP_021422287.1	gene27833:106566707	XM_014135013.1	XP_013990488.1	LOC106566707	FALSE	FALSE	poly(rC)-binding protein 2-like	325	2343	1	protein_coding	XP_021422287.1	gi|929228084|ref|XP_013990492.1|	100	318	0	0	1	318	1	318	0	640	XP_021422287.1poly(rC)-bindingprotein2-likeisoformX4[Oncorhynchusmykiss];XP_021422286.1poly(rC)-bindingprotein2-likeisoformX3[Oncorhynchusmykiss];XP_021422285.1poly(rC)-bindingprotein2-likeisoformX2[Oncorhynchusmykiss];XP_021422284.1poly(rC)-bindingprotein2-likeisoformX1[Oncorhynchusmykiss];XP_021422283.1poly(rC)-bindingprotein2-likeisoformX1[Oncorhynchusmykiss]	XP_021422287.1poly(rC)-bindingprotein2-likeisoformX4[Oncorhynchusmykiss];XP_021422286.1poly(rC)-bindingprotein2-likeisoformX3[Oncorhynchusmykiss];XP_021422285.1poly(rC)-bindingprotein2-likeisoformX2[Oncorhynchusmykiss];XP_021422284.1poly(rC)-bindingprotein2-likeisoformX1[Oncorhynchusmykiss];XP_021422283.1poly(rC)-bindingprotein2-likeisoformX1[Oncorhynchusmykiss]	6;6;6;6;6	6;6;6;6;6	1;1;1;1;1	;;;;	5	6	6	1	5	5	5	5	4	6	2	4	3	4	5	5	5	5	5	4
XP_021422289.1	gene21651:106561070	XM_014124690.1	XP_013980165.1	LOC106561070	FALSE	FALSE	proteasome subunit alpha type-1	262	1114	1	protein_coding	XP_021422289.1	gi|929125003|ref|XP_013980165.1|	99.24	262	2	0	1	262	1	262	3e-154	543	XP_021422289.1proteasomesubunitalphatype-1-like[Oncorhynchusmykiss]	XP_021422289.1proteasomesubunitalphatype-1-like[Oncorhynchusmykiss]	9	4	4		1	9	4	4	7	5	6	7	5	9	5	6	5	5	6	2	1	2	2	1
XP_021422300.1	gene27825:100196702	XM_014134957.1	XP_013990432.1	g6pd	FALSE	FALSE	glucose-6-phosphate dehydrogenase	532	3004	1	protein_coding	XP_021422300.1	gi|213512060|ref|NP_001135196.1|	99.04	519	5	0	1	519	1	519	0	1073	XP_021422300.1glucose-6-phosphate1-dehydrogenase-likeisoformX2[Oncorhynchusmykiss];XP_021422299.1glucose-6-phosphate1-dehydrogenase-likeisoformX1[Oncorhynchusmykiss];XP_021422298.1glucose-6-phosphate1-dehydrogenase-likeisoformX1[Oncorhynchusmykiss]	XP_021422300.1glucose-6-phosphate1-dehydrogenase-likeisoformX2[Oncorhynchusmykiss];XP_021422299.1glucose-6-phosphate1-dehydrogenase-likeisoformX1[Oncorhynchusmykiss];XP_021422298.1glucose-6-phosphate1-dehydrogenase-likeisoformX1[Oncorhynchusmykiss]	23;23;23	23;23;23	6;6;6	;;	3	23	23	6	23	22	23	22	21	22	22	22	22	22	23	23	22	23	22	21
XP_021422301.1	gene27826:106566713	XM_014135023.1	XP_013990498.1	LOC106566713	FALSE	FALSE	glycerol-3-phosphate dehydrogenase [NAD(+)], cytoplasmic-like	351	1884	1	protein_coding	XP_021422301.1	gi|929228094|ref|XP_013990498.1|	98.86	351	4	0	1	351	1	351	0	715	XP_021422301.1glycerol-3-phosphatedehydrogenase[NAD(+)],cytoplasmic-like[Oncorhynchusmykiss]	XP_021422301.1glycerol-3-phosphatedehydrogenase[NAD(+)],cytoplasmic-like[Oncorhynchusmykiss]	10	3	3		1	10	3	3	10	10	10	10	10	10	10	10	10	10	10	3	3	3	3	3
XP_021422307.1	gene27816:106566721	XM_014135038.1	XP_013990513.1	LOC106566721	FALSE	FALSE	prostaglandin E synthase 3-like	175	1602	1	protein_coding	XP_021422307.1	gi|929228122|ref|XP_013990513.1|	99.43	175	1	0	1	175	1	175	4e-99	358	XP_021422307.1prostaglandinEsynthase3-like[Oncorhynchusmykiss];XP_021471285.1prostaglandinEsynthase3-likeisoformX2[Oncorhynchusmykiss];XP_021471284.1prostaglandinEsynthase3-likeisoformX1[Oncorhynchusmykiss]	XP_021422307.1prostaglandinEsynthase3-like[Oncorhynchusmykiss];XP_021471285.1prostaglandinEsynthase3-likeisoformX2[Oncorhynchusmykiss];XP_021471284.1prostaglandinEsynthase3-likeisoformX1[Oncorhynchusmykiss]	2;1;1	2;1;1	2;1;1	;;	3	2	2	2	2	2	2	2	2	2	2	2	2	2	2	2	2	2	2	2
XP_021422444.1	gene27743:100196324	NM_001141353.2	NP_001134825.1	st1s3	FALSE	FALSE	Cytosolic sulfotransferase 3	296	1409	1	protein_coding	XP_021422444.1	gi|213511424|ref|NP_001134825.1|	97.61	293	7	0	1	293	4	296	4e-173	605	XP_021422444.1cytosolicsulfotransferase3-likeisoformX6[Oncorhynchusmykiss];XP_021422443.1cytosolicsulfotransferase3-likeisoformX6[Oncorhynchusmykiss];XP_021422441.1cytosolicsulfotransferase3-likeisoformX4[Oncorhynchusmykiss]	XP_021422444.1cytosolicsulfotransferase3-likeisoformX6[Oncorhynchusmykiss];XP_021422443.1cytosolicsulfotransferase3-likeisoformX6[Oncorhynchusmykiss];XP_021422441.1cytosolicsulfotransferase3-likeisoformX4[Oncorhynchusmykiss]	7;7;7	1;1;1	0;0;0	;;	3	7	1	0	6	6	7	7	7	7	6	7	6	5	7	0	1	1	1	1
XP_021422446.1	gene27741:106566634	XM_014134845.1	XP_013990320.1	LOC106566634	FALSE	FALSE	cytosolic sulfotransferase 3-like	335	2070	1	protein_coding	XP_021422446.1	gi|929227761|ref|XP_013990320.1|	96.93	293	9	0	1	293	43	335	3e-173	606	XP_021422446.1cytosolicsulfotransferase3-likeisoformX7[Oncorhynchusmykiss];XP_021422445.1cytosolicsulfotransferase3-likeisoformX7[Oncorhynchusmykiss];XP_021422442.1cytosolicsulfotransferase3-likeisoformX5[Oncorhynchusmykiss];XP_021422440.1cytosolicsulfotransferase3-likeisoformX3[Oncorhynchusmykiss];XP_021422439.1cytosolicsulfotransferase3-likeisoformX3[Oncorhynchusmykiss];XP_021422438.1cytosolics…	XP_021422446.1cytosolicsulfotransferase3-likeisoformX7[Oncorhynchusmykiss];XP_021422445.1cytosolicsulfotransferase3-likeisoformX7[Oncorhynchusmykiss];XP_021422442.1cytosolicsulfotransferase3-likeisoformX5[Oncorhynchusmykiss];XP_021422440.1cytosolicsulfotransferase3-likeisoformX3[Oncorhynchusmykiss];XP_021422439.1cytosolicsulfotransferase3-likeisoformX3[Oncorhynchusmykiss];XP_021422438.1cytosolics…	8;8;8;8;8;8;8;5	1;1;1;1;1;1;1;1	0;0;0;0;0;0;0;0	;;;;;;;	8	8	1	0	7	6	7	8	7	8	6	7	7	6	7	0	0	0	1	0
XP_021422453.1	gene34024:106572884	XM_014147460.1	XP_014002935.1	LOC106572884	FALSE	FALSE	ER membrane protein complex subunit 1-like	981	3934	1	protein_coding	XP_021422453.1	gi|929253299|ref|XP_014002935.1|	93.46	994	48	1	10	1003	5	981	0	1891	XP_021422453.1ERmembraneproteincomplexsubunit1-like[Oncorhynchusmykiss];XP_021470164.1LOWQUALITYPROTEIN:ERmembraneproteincomplexsubunit1-like[Oncorhynchusmykiss]	XP_021422453.1ERmembraneproteincomplexsubunit1-like[Oncorhynchusmykiss]	6;1	6;1	6;1		2	6	6	6	6	6	6	6	5	6	6	6	5	6	6	6	6	6	6	5
XP_021422458.1	gene27350:100195457	XM_014134207.1	XP_013989682.1	adrm1	FALSE	FALSE	ADRM1 protein	413	1657	1	protein_coding	XP_021422458.1	gi|929226582|ref|XP_013989682.1|	99.27	413	3	0	1	413	1	413	0	827	XP_021422458.1proteasomalubiquitinreceptorADRM1-like[Oncorhynchusmykiss]	XP_021422458.1proteasomalubiquitinreceptorADRM1-like[Oncorhynchusmykiss]	2	2	2		1	2	2	2	2	2	2	2	2	2	2	2	2	2	2	2	2	2	2	2
XP_021422462.1	gene27737:106566638	XM_014134851.1	XP_013990326.1	qars	FALSE	FALSE	glutaminyl-tRNA synthetase	775	2908	1	protein_coding	XP_021422462.1	gi|929227771|ref|XP_013990326.1|	98.06	775	12	1	1	772	1	775	0	1566	XP_021422462.1glutamine--tRNAligase[Oncorhynchusmykiss]	XP_021422462.1glutamine--tRNAligase[Oncorhynchusmykiss]	25	25	25		1	25	25	25	23	19	21	23	18	24	17	16	20	18	17	23	19	21	23	18
XP_021422466.1	gene27740:100195645	NM_001140674.1	NP_001134146.1	st2s2	FALSE	FALSE	Cytosolic sulfotransferase 2	291	1112	1	protein_coding	XP_021422466.1	gi|213511312|ref|NP_001134146.1|	95.19	291	14	0	4	294	1	291	9e-167	584	XP_021422466.1cytosolicsulfotransferase2-like[Oncorhynchusmykiss];XP_021422448.1cytosolicsulfotransferase2-likeisoformX1[Oncorhynchusmykiss];XP_021422447.1cytosolicsulfotransferase2-likeisoformX1[Oncorhynchusmykiss];XP_021422449.1cytosolicsulfotransferase2-likeisoformX2[Oncorhynchusmykiss];XP_021448321.1cytosolicsulfotransferase2-like[Oncorhynchusmykiss];XP_021420157.1cytosolicsulfotransferase2-l…	XP_021422466.1cytosolicsulfotransferase2-like[Oncorhynchusmykiss];XP_021422448.1cytosolicsulfotransferase2-likeisoformX1[Oncorhynchusmykiss];XP_021422447.1cytosolicsulfotransferase2-likeisoformX1[Oncorhynchusmykiss];XP_021422449.1cytosolicsulfotransferase2-likeisoformX2[Oncorhynchusmykiss];XP_021448321.1cytosolicsulfotransferase2-like[Oncorhynchusmykiss]	15;10;10;10;8;5;2	15;10;10;10;8;5;2	8;7;7;7;4;2;2	;;;;	7	15	15	8	14	13	14	14	13	14	12	14	13	13	14	14	13	14	14	13
XP_021422492.1	gene27722:106566652	XM_014134888.1	XP_013990363.1	LOC106566652	FALSE	FALSE	RNA-binding protein 39-like	546	2788	1	protein_coding	XP_021422492.1	gi|929227842|ref|XP_013990363.1|	99.63	546	2	0	1	546	1	546	0	1123	XP_021422492.1RNA-bindingprotein39-like[Oncorhynchusmykiss];XP_021471177.1RNA-bindingprotein39-like[Oncorhynchusmykiss]	XP_021422492.1RNA-bindingprotein39-like[Oncorhynchusmykiss]	3;1	1;1	1;1		2	3	1	1	2	3	2	2	2	2	2	2	2	2	2	1	1	1	1	1
XP_021422626.1	gene27626:106566534	XM_014134633.1	XP_013990108.1	LOC106566534	FALSE	FALSE	complement C1q tumor necrosis factor-related protein 3-like	217	805	1	protein_coding	XP_021422626.1	gi|929227375|ref|XP_013990108.1|	88.99	218	21	1	8	225	1	215	9e-110	394	XP_021422626.1complementC1qtumornecrosisfactor-relatedprotein3[Oncorhynchusmykiss]	XP_021422626.1complementC1qtumornecrosisfactor-relatedprotein3[Oncorhynchusmykiss]	8	8	8		1	8	8	8	3	4	7	4	5	6	3	4	4	5	4	3	4	7	4	5
XP_021422637.1	gene27607:106566520	XM_014134617.1	XP_013990092.1	apeh	FALSE	FALSE	acylaminoacyl-peptide hydrolase	731	3059	1	protein_coding	XP_021422637.1	gi|929227345|ref|XP_013990092.1|	98.5	731	11	0	1	731	1	731	0	1481	XP_021422637.1acylamino-acid-releasingenzymeisoformX2[Oncorhynchusmykiss];XP_021422636.1acylamino-acid-releasingenzymeisoformX1[Oncorhynchusmykiss]	XP_021422637.1acylamino-acid-releasingenzymeisoformX2[Oncorhynchusmykiss];XP_021422636.1acylamino-acid-releasingenzymeisoformX1[Oncorhynchusmykiss]	15;15	15;15	15;15	;	2	15	15	15	12	13	12	12	11	14	12	12	14	12	12	12	13	12	12	11
XP_021422638.1	gene27608:100195076	XM_014134615.1	XP_013990090.1	capza1	FALSE	FALSE	capping protein (actin filament) muscle Z-line, alpha 1	286	2119	1	protein_coding	XP_021422638.1	gi|213510714|ref|NP_001133577.1|	99.65	286	1	0	1	286	1	286	8e-172	601	XP_021422638.1F-actin-cappingproteinsubunitalpha-1-like[Oncorhynchusmykiss]	XP_021422638.1F-actin-cappingproteinsubunitalpha-1-like[Oncorhynchusmykiss]	9	9	7		1	9	9	7	8	8	7	8	8	8	9	9	8	9	8	8	8	7	8	8
XP_021422639.1	gene29165:106568073	XM_014138077.1	XP_013993552.1	LOC106568073	FALSE	FALSE	cytochrome P450 3A30-like	505	2076	1	protein_coding	XP_021422639.1	gi|929235493|ref|XP_013993552.1|	95.64	505	22	0	1	505	1	505	0	1006	XP_021422639.1cytochromeP4503A30-like[Oncorhynchusmykiss]	XP_021422639.1cytochromeP4503A30-like[Oncorhynchusmykiss]	11	11	11		1	11	11	11	10	11	9	11	9	8	11	11	10	11	11	10	11	9	11	9
XP_021422669.1	gene27581:106566495	XM_014134577.1	XP_013990052.1	bcap31	FALSE	FALSE	B-cell receptor-associated protein 31	249	3118	1	protein_coding	XP_021422669.1	gi|929227262|ref|XP_013990052.1|	98.39	249	4	0	1	249	1	249	2e-142	503	XP_021422669.1B-cellreceptor-associatedprotein31isoformX2[Oncorhynchusmykiss];XP_021422668.1B-cellreceptor-associatedprotein31isoformX1[Oncorhynchusmykiss]	XP_021422669.1B-cellreceptor-associatedprotein31isoformX2[Oncorhynchusmykiss];XP_021422668.1B-cellreceptor-associatedprotein31isoformX1[Oncorhynchusmykiss]	3;3	3;3	3;3	;	2	3	3	3	3	3	2	3	3	2	2	3	2	3	3	3	3	2	3	3
XP_021422703.1	gene27424:106566372	XM_014134323.1	XP_013989798.1	LOC106566372	FALSE	FALSE	glutathione S-transferase Mu 3-like	219	1215	1	protein_coding	XP_021422703.1	gi|929226792|ref|XP_013989798.1|	95.89	219	9	0	1	219	1	219	5e-123	438	XP_021422703.1glutathioneS-transferaseMu3-like[Oncorhynchusmykiss]	XP_021422703.1glutathioneS-transferaseMu3-like[Oncorhynchusmykiss]	13	13	13		1	13	13	13	11	10	10	11	10	10	13	12	10	12	12	11	10	10	11	10
XP_021422720.1	gene27557:106566469	XM_014134535.1	XP_013990010.1	LOC106566469	FALSE	FALSE	minor histocompatibility antigen H13-like	395	2437	1	protein_coding	XP_021422720.1	gi|929227180|ref|XP_013990011.1|	97.86	140	3	0	1	140	244	383	3e-75	278	XP_021422720.1minorhistocompatibilityantigenH13-like[Oncorhynchusmykiss]	XP_021422720.1minorhistocompatibilityantigenH13-like[Oncorhynchusmykiss]	2	2	2		1	2	2	2	2	2	2	2	2	2	2	2	2	1	2	2	2	2	2	2
XP_021422737.1	gene27531:106566437	XM_014134468.1	XP_013989943.1	LOC106566437	FALSE	FALSE	cytochrome c oxidase subunit 4 isoform 2, mitochondrial-like	177	854	1	protein_coding	XP_021422737.1	gi|929227057|ref|XP_013989943.1|	96.61	177	4	1	21	195	1	177	1e-97	353	XP_021422737.1cytochromecoxidasesubunit4isoform2,mitochondrial-like[Oncorhynchusmykiss]	XP_021422737.1cytochromecoxidasesubunit4isoform2,mitochondrial-like[Oncorhynchusmykiss]	3	3	3		1	3	3	3	3	3	3	3	3	3	3	3	3	3	3	3	3	3	3	3
XP_021422796.1	gene27453:106566399	XM_014134387.1	XP_013989862.1	LOC106566399	FALSE	FALSE	matrix metalloproteinase-9-like	688	3001	1	protein_coding	XP_021422796.1	gi|929226907|ref|XP_013989862.1|	97.99	648	13	0	1	648	41	688	0	1239	XP_021422796.1matrixmetalloproteinase-9-like[Oncorhynchusmykiss]	XP_021422796.1matrixmetalloproteinase-9-like[Oncorhynchusmykiss]	3	3	3		1	3	3	3	3	2	3	0	2	2	0	0	0	0	0	3	2	3	0	2
XP_021422810.1	gene27440:100195808	NM_001140837.1	NP_001134309.1	nattl	FALSE	FALSE	Natterin-like protein	310	1478	1	protein_coding	XP_021422810.1	gi|929226850|ref|XP_013989830.1|	95.16	310	15	0	1	310	1	310	2e-173	607	XP_021422810.1natterin-likeproteinisoformX1[Oncorhynchusmykiss];XP_021422809.1natterin-likeproteinisoformX1[Oncorhynchusmykiss];XP_021422808.1natterin-likeproteinisoformX1[Oncorhynchusmykiss];XP_021422807.1natterin-likeproteinisoformX2[Oncorhynchusmykiss];XP_021422806.1natterin-likeproteinisoformX2[Oncorhynchusmykiss];XP_021422805.1natterin-likeproteinisoformX1[Oncorhynchusmykiss];XP_021422817.1n…	XP_021422810.1natterin-likeproteinisoformX1[Oncorhynchusmykiss];XP_021422809.1natterin-likeproteinisoformX1[Oncorhynchusmykiss];XP_021422808.1natterin-likeproteinisoformX1[Oncorhynchusmykiss];XP_021422807.1natterin-likeproteinisoformX2[Oncorhynchusmykiss];XP_021422806.1natterin-likeproteinisoformX2[Oncorhynchusmykiss];XP_021422805.1natterin-likeproteinisoformX1[Oncorhynchusmykiss]	4;4;4;2;2;2;1;1;1;1;1	4;4;4;2;2;2;1;1;1;1;1	3;3;3;2;2;2;1;0;0;0;0	;;;;;	11	4	4	3	4	1	4	2	3	4	0	0	0	0	1	4	1	4	2	3
XP_021422818.1	gene27435:106566386	XM_014134360.1	XP_013989835.1	LOC106566386	FALSE	FALSE	heat shock 70 kDa protein-like	644	2472	1	protein_coding	XP_021422818.1	gi|929226858|ref|XP_013989835.1|	98.6	644	9	0	1	644	1	644	0	1307	XP_021422818.1heatshock70kDaprotein-like[Oncorhynchusmykiss]	XP_021422818.1heatshock70kDaprotein-like[Oncorhynchusmykiss]	5	1	1		1	5	1	1	5	5	5	5	5	5	5	5	5	5	5	1	1	1	1	1
XP_021422835.1	gene34053:106572905	XM_014147490.1	XP_014002965.1	LOC106572905	FALSE	TRUE	40S ribosomal protein S21-like	99	391	1	protein_coding	XP_021422835.1	gi|929253351|ref|XP_014002965.1|	97.53	81	2	0	1	81	17	97	5e-41	164	XP_021422835.140SribosomalproteinS21-like[Oncorhynchusmykiss]	XP_021422835.140SribosomalproteinS21-like[Oncorhynchusmykiss]	3	3	3		1	3	3	3	2	1	3	2	1	2	2	2	3	2	1	2	1	3	2	1
XP_021422843.1	gene27376:100195505	NM_001140534.1	NP_001134006.1	tkt	FALSE	FALSE	transketolase	626	2824	1	protein_coding	XP_021422843.1	gi|213511480|ref|NP_001134006.1|	97.12	626	18	0	1	626	1	626	0	1279	XP_021422843.1transketolase-like[Oncorhynchusmykiss]	XP_021422843.1transketolase-like[Oncorhynchusmykiss]	26	26	14		1	26	26	14	26	22	22	22	21	22	20	21	20	24	21	26	22	22	22	21
XP_021422847.1	gene27388:100380643	XM_014134249.1	XP_013989724.1	LOC100380643	FALSE	FALSE	filamin-A	2573	9393	1	protein_coding	XP_021422847.1	gi|929226664|ref|XP_013989727.1|	99.1	2544	23	0	1	2544	1	2544	0	5168	XP_021422847.1filamin-A-like[Oncorhynchusmykiss];XP_021450558.1filamin-A-like,partial[Oncorhynchusmykiss];XP_021419882.1LOWQUALITYPROTEIN:filamin-C-like[Oncorhynchusmykiss];XP_021433026.1filamin-C-like[Oncorhynchusmykiss];XP_021450101.1filamin-A-like,partial[Oncorhynchusmykiss]	XP_021422847.1filamin-A-like[Oncorhynchusmykiss]	38;4;4;4;1	35;4;3;3;1	33;4;1;1;1		5	38	35	33	33	33	35	30	32	31	30	29	34	32	33	30	31	32	28	30
XP_021422854.1	gene27383:106566331	XM_014134244.1	XP_013989719.1	LOC106566331	FALSE	FALSE	monocarboxylate transporter 1-like	474	6381	1	protein_coding	XP_021422854.1	gi|929226649|ref|XP_013989719.1|	92.6	446	11	2	18	463	51	474	0	792	XP_021422854.1monocarboxylatetransporter1-like[Oncorhynchusmykiss]	XP_021422854.1monocarboxylatetransporter1-like[Oncorhynchusmykiss]	2	2	2		1	2	2	2	2	1	2	2	2	2	2	2	2	2	2	2	1	2	2	2
XP_021422861.1	gene27357:100196585	NM_001141614.1	NP_001135086.1	hsd17b10	FALSE	TRUE	hydroxysteroid (17-beta) dehydrogenase 10	260	1227	1	protein_coding	XP_021422861.1	gi|213512414|ref|NP_001135086.1|	100	260	0	0	1	260	1	260	8e-149	525	XP_021422861.13-hydroxyacyl-CoAdehydrogenasetype-2[Oncorhynchusmykiss]	XP_021422861.13-hydroxyacyl-CoAdehydrogenasetype-2[Oncorhynchusmykiss]	7	7	7		1	7	7	7	6	6	6	7	5	7	6	6	6	6	7	6	6	6	7	5
XP_021422870.1	gene28344:106567206	XM_014136226.1	XP_013991701.1	LOC106567206	FALSE	FALSE	ras-related protein O-Krev	184	1752	1	protein_coding	XP_021422870.1	gi|929230322|ref|XP_013991700.1|	99.46	184	1	0	1	184	1	184	1e-104	377	XP_021422870.1ras-relatedproteinRap-1b-likeisoformX1[Oncorhynchusmykiss];XP_021422869.1ras-relatedproteinRap-1b-likeisoformX1[Oncorhynchusmykiss];XP_021472174.1ras-relatedproteinRap-1A-like[Oncorhynchusmykiss];XP_021472173.1ras-relatedproteinRap-1A-like[Oncorhynchusmykiss];XP_021472172.1ras-relatedproteinRap-1A-like[Oncorhynchusmykiss];XP_021472171.1ras-relatedproteinRap-1A-like[Oncorhynchusmykis…	XP_021422870.1ras-relatedproteinRap-1b-likeisoformX1[Oncorhynchusmykiss];XP_021422869.1ras-relatedproteinRap-1b-likeisoformX1[Oncorhynchusmykiss];XP_021472174.1ras-relatedproteinRap-1A-like[Oncorhynchusmykiss];XP_021472173.1ras-relatedproteinRap-1A-like[Oncorhynchusmykiss];XP_021472172.1ras-relatedproteinRap-1A-like[Oncorhynchusmykiss];XP_021472171.1ras-relatedproteinRap-1A-like[Oncorhynchusmykis…	6;6;6;6;6;6;3	1;1;1;1;1;1;1	0;0;0;0;0;0;0	;;;;;;	7	6	1	0	6	5	6	6	6	6	6	6	5	6	6	1	0	1	1	1
XP_021422884.1	gene28353:100380349	XM_014135584.1	XP_013991059.1	mare1	FALSE	FALSE	Microtubule-associated protein RP/EB family member 1	274	2092	1	protein_coding	XP_021422884.1	gi|291190347|ref|NP_001167105.1|	98.06	258	5	0	1	258	1	258	2e-150	530	XP_021422884.1microtubule-associatedproteinRP/EBfamilymember1-likeisoformX2[Oncorhynchusmykiss];XP_021422883.1microtubule-associatedproteinRP/EBfamilymember1-likeisoformX1[Oncorhynchusmykiss];XP_021422882.1microtubule-associatedproteinRP/EBfamilymember1-likeisoformX1[Oncorhynchusmykiss];XP_021422186.1microtubule-associatedproteinRP/EBfamilymember1-likeisoformX1[Oncorhynchusmykiss]	XP_021422884.1microtubule-associatedproteinRP/EBfamilymember1-likeisoformX2[Oncorhynchusmykiss];XP_021422883.1microtubule-associatedproteinRP/EBfamilymember1-likeisoformX1[Oncorhynchusmykiss];XP_021422882.1microtubule-associatedproteinRP/EBfamilymember1-likeisoformX1[Oncorhynchusmykiss]	6;6;6;1	6;6;6;1	2;2;2;0	;;	4	6	6	2	6	6	6	6	6	6	6	6	5	6	6	6	6	6	6	6
XP_021422902.1	gene28360:106567220	XM_014136249.1	XP_013991724.1	LOC106567220	FALSE	FALSE	YTH domain-containing family protein 1-like	621	3665	1	protein_coding	XP_021422902.1	gi|929230366|ref|XP_013991724.1|	98.91	550	4	1	1	548	72	621	0	1030	XP_021422902.1YTHdomain-containingfamilyprotein1-likeisoformX3[Oncorhynchusmykiss];XP_021422900.1YTHdomain-containingfamilyprotein1-likeisoformX2[Oncorhynchusmykiss];XP_021422899.1YTHdomain-containingfamilyprotein1-likeisoformX1[Oncorhynchusmykiss];XP_021472144.1YTHdomain-containingfamilyprotein1-likeisoformX2[Oncorhynchusmykiss];XP_021472143.1YTHdomain-containingfamilyprotein1-likeisoformX1[Onco…	XP_021422902.1YTHdomain-containingfamilyprotein1-likeisoformX3[Oncorhynchusmykiss];XP_021422900.1YTHdomain-containingfamilyprotein1-likeisoformX2[Oncorhynchusmykiss];XP_021422899.1YTHdomain-containingfamilyprotein1-likeisoformX1[Oncorhynchusmykiss];XP_021472144.1YTHdomain-containingfamilyprotein1-likeisoformX2[Oncorhynchusmykiss];XP_021472143.1YTHdomain-containingfamilyprotein1-likeisoformX1[Onco…	2;2;2;2;2;2;2;2;1;1;1;1	2;2;2;2;2;2;2;2;1;1;1;1	2;2;2;2;2;2;2;2;1;1;1;1	;;;;;;;;;;;	12	2	2	2	2	2	2	2	2	2	2	2	2	2	2	2	2	2	2	2
XP_021422918.1	gene33599:100196536	NM_001141565.2	NP_001135037.2	fkb1b	FALSE	FALSE	FK506-binding protein 1B	108	825	1	protein_coding	XP_021422918.1	gi|304434637|ref|NP_001135037.2|	100	108	0	0	1	108	1	108	3e-58	221	XP_021422918.1peptidyl-prolylcis-transisomeraseFKBP1A-like[Oncorhynchusmykiss]	XP_021422918.1peptidyl-prolylcis-transisomeraseFKBP1A-like[Oncorhynchusmykiss]	5	5	5		1	5	5	5	4	5	5	4	5	5	5	5	3	5	4	4	5	5	4	5
XP_021422987.1	gene50926:106589412	XM_014179374.1	XP_014034849.1	LOC106589412	FALSE	FALSE	protein transport protein Sec24C-like	1224	5400	1	protein_coding	XP_021422987.1	gi|929314125|ref|XP_014034849.1|	84.13	1235	123	11	1	1218	1	1179	0	1868	XP_021422987.1proteintransportproteinSec24C-like[Oncorhynchusmykiss]	XP_021422987.1proteintransportproteinSec24C-like[Oncorhynchusmykiss]	5	1	1		1	5	1	1	4	4	4	3	4	5	4	4	4	3	4	1	1	1	0	1
XP_021422999.1	gene21709:106561021	XM_014124569.1	XP_013980044.1	LOC106561021	FALSE	FALSE	dihydrolipoyl dehydrogenase, mitochondrial-like	508	2282	1	protein_coding	XP_021422999.1	gi|929124767|ref|XP_013980044.1|	99.8	508	1	0	1	508	1	508	0	1040	XP_021422999.1dihydrolipoyldehydrogenase,mitochondrial-like[Oncorhynchusmykiss]	XP_021422999.1dihydrolipoyldehydrogenase,mitochondrial-like[Oncorhynchusmykiss]	11	11	4		1	11	11	4	11	10	10	10	9	11	10	9	9	10	10	11	10	10	10	9
XP_021423003.1	gene14658:106607836	XM_014205233.1	XP_014060708.1	LOC106607836	FALSE	FALSE	uncharacterized LOC106607836	1200	5625	1	protein_coding	XP_021423003.1	gi|929099377|ref|XP_014060711.1|	43.58	358	133	12	6	311	260	600	1e-64	246	XP_021423003.1uncharacterizedproteinLOC110492853[Oncorhynchusmykiss]	XP_021423003.1uncharacterizedproteinLOC110492853[Oncorhynchusmykiss]	2	2	2		1	2	2	2	1	1	1	1	1	1	2	2	1	0	1	1	1	1	1	1
XP_021423087.1	gene21728:106561008	XM_014124544.1	XP_013980019.1	LOC106561008	FALSE	FALSE	AFG3-like protein 1	738	4694	1	protein_coding	XP_021423087.1	gi|929124719|ref|XP_013980019.1|	88.98	744	72	5	1	742	1	736	0	1325	XP_021423087.1AFG3-likeprotein1[Oncorhynchusmykiss];XP_021463141.1AFG3-likeprotein1[Oncorhynchusmykiss];XP_021442003.1AFG3-likeprotein1[Oncorhynchusmykiss]	XP_021423087.1AFG3-likeprotein1[Oncorhynchusmykiss];XP_021463141.1AFG3-likeprotein1[Oncorhynchusmykiss];XP_021442003.1AFG3-likeprotein1[Oncorhynchusmykiss]	2;1;1	2;1;1	1;0;0	;;	3	2	2	1	2	2	2	2	2	2	2	1	1	2	1	2	2	2	2	2
XP_021423089.1	gene26456:106565531	XM_014132768.1	XP_013988243.1	LOC106565531	FALSE	FALSE	5'-AMP-activated protein kinase subunit gamma-1-like	332	2694	1	protein_coding	XP_021423089.1	gi|929223824|ref|XP_013988243.1|	99.7	332	1	0	77	408	1	332	0	680	XP_021423089.15'-AMP-activatedproteinkinasegamma-1subunitisoformX1[Oncorhynchusmykiss]	XP_021423089.15'-AMP-activatedproteinkinasegamma-1subunitisoformX1[Oncorhynchusmykiss]	10	10	5		1	10	10	5	9	9	9	9	9	7	9	9	10	8	10	9	9	9	9	9
XP_021423113.1	gene25836:100196848	NM_001141870.1	NP_001135342.1	rbbp9	FALSE	FALSE	retinoblastoma binding protein 9	184	1000	1	protein_coding	XP_021423113.1	gi|213513754|ref|NP_001135342.1|	96.64	149	5	0	1	149	36	184	7e-83	304	XP_021423113.1putativehydrolaseRBBP9isoformX1[Oncorhynchusmykiss]	XP_021423113.1putativehydrolaseRBBP9isoformX1[Oncorhynchusmykiss]	2	2	2		1	2	2	2	2	2	1	2	2	2	2	2	2	2	2	2	2	1	2	2
XP_021423124.1	gene4598:106585541	XM_014171869.1	XP_014027344.1	LOC106585541	FALSE	TRUE	collagen alpha-6(VI) chain-like	2730	8872	1	protein_coding	XP_021423124.1	gi|929067270|ref|XP_014027344.1|	96.2	158	6	0	1	158	1	158	1e-85	313	XP_021423124.1collagenalpha-1(XIV)chain-like[Oncorhynchusmykiss]	XP_021423124.1collagenalpha-1(XIV)chain-like[Oncorhynchusmykiss]	3	1	1		1	3	1	1	1	1	2	1	2	3	3	1	2	2	2	1	1	1	1	1
XP_021423186.1	gene26666:106565836	XM_014133406.1	XP_013988881.1	LOC106565836	FALSE	FALSE	succinyl-CoA ligase [GDP-forming] subunit beta, mitochondrial-like	432	2610	1	protein_coding	XP_021423186.1	gi|929225029|ref|XP_013988881.1|	94.96	139	7	0	138	276	219	357	1e-75	281	XP_021423186.1succinate--CoAligase[GDP-forming]subunitbeta,mitochondrial-like[Oncorhynchusmykiss]	XP_021423186.1succinate--CoAligase[GDP-forming]subunitbeta,mitochondrial-like[Oncorhynchusmykiss]	6	2	2		1	6	2	2	6	5	6	5	5	6	4	4	4	4	5	2	2	2	2	2
XP_021423202.1	gene26930:106566056	XM_014133867.1	XP_013989342.1	LOC106566056	FALSE	FALSE	importin-9	1057	3994	1	protein_coding	XP_021423202.1	gi|929225913|ref|XP_013989342.1|	99.86	713	1	0	1	713	12	724	0	1410	XP_021423202.1importin-9-like[Oncorhynchusmykiss];XP_021464959.1importin-9[Oncorhynchusmykiss]	XP_021423202.1importin-9-like[Oncorhynchusmykiss];XP_021464959.1importin-9[Oncorhynchusmykiss]	2;1	2;1	2;1	;	2	2	2	2	2	2	2	2	2	2	2	2	2	2	2	2	2	2	2	2
XP_021423246.1	gene25200:106564348	XM_014130404.1	XP_013985879.1	LOC106564348	FALSE	TRUE	tether containing UBX domain for GLUT4-like	602	2203	1	protein_coding	XP_021423246.1	gi|929219438|ref|XP_013985879.1|	92.47	611	36	5	1	610	1	602	0	1051	XP_021423246.1tethercontainingUBXdomainforGLUT4-like[Oncorhynchusmykiss];XP_021426156.1tethercontainingUBXdomainforGLUT4-like[Oncorhynchusmykiss];XP_021426154.1tethercontainingUBXdomainforGLUT4-like[Oncorhynchusmykiss];XP_021449085.1tethercontainingUBXdomainforGLUT4-like[Oncorhynchusmykiss];XP_021450257.1tethercontainingUBXdomainforGLUT4-like,partial[Oncorhynchusmykiss]	XP_021423246.1tethercontainingUBXdomainforGLUT4-like[Oncorhynchusmykiss];XP_021426156.1tethercontainingUBXdomainforGLUT4-like[Oncorhynchusmykiss];XP_021426154.1tethercontainingUBXdomainforGLUT4-like[Oncorhynchusmykiss];XP_021449085.1tethercontainingUBXdomainforGLUT4-like[Oncorhynchusmykiss]	3;2;2;2;1	3;2;2;2;1	3;2;2;2;1	;;;	5	3	3	3	2	2	2	2	2	2	2	2	2	2	2	2	2	2	2	2
XP_021423264.1	gene5412:106593793	XM_014185174.1	XP_014040649.1	LOC106593793	FALSE	TRUE	eukaryotic translation initiation factor 3 subunit B-like	690	2872	1	protein_coding	XP_021423264.1	gi|929070056|ref|XP_014040649.1|	99.13	690	6	0	1	690	1	690	0	1426	XP_021423264.1eukaryotictranslationinitiationfactor3subunitB[Oncorhynchusmykiss]	XP_021423264.1eukaryotictranslationinitiationfactor3subunitB[Oncorhynchusmykiss]	17	17	17		1	17	17	17	15	13	14	17	15	17	13	14	13	15	13	15	13	14	17	15
XP_021423313.1	gene21747:106560994	XM_014124506.1	XP_013979981.1	LOC106560994	FALSE	FALSE	protein MON2 homolog	1714	6143	1	protein_coding	XP_021423313.1	gi|929124640|ref|XP_013979981.1|	99.07	1714	15	1	1	1713	1	1714	0	3311	XP_021423313.1proteinMON2homolog[Oncorhynchusmykiss];XP_021456893.1proteinMON2homolog[Oncorhynchusmykiss]	XP_021423313.1proteinMON2homolog[Oncorhynchusmykiss];XP_021456893.1proteinMON2homolog[Oncorhynchusmykiss]	2;1	2;1	2;1	;	2	2	2	2	1	1	1	2	1	1	1	1	1	1	1	1	1	1	2	1
XP_021423324.1	gene71830:106595636	XM_014187002.1	XP_014042477.1	LOC106595636	FALSE	TRUE	methylthioribose-1-phosphate isomerase	353	1698	1	protein_coding	XP_021423324.1	gi|929330765|ref|XP_014042477.1|	100	353	0	0	1	353	1	353	0	722	XP_021423324.1methylthioribose-1-phosphateisomerase[Oncorhynchusmykiss];XP_021447918.1methylthioribose-1-phosphateisomerase-like,partial[Oncorhynchusmykiss]	XP_021423324.1methylthioribose-1-phosphateisomerase[Oncorhynchusmykiss]	8;3	8;3	8;3		2	8	8	8	8	6	7	7	8	8	6	7	6	7	8	8	6	7	7	8
XP_021423331.1	gene21749:100286547	NM_001146486.1	NP_001139958.1	akr1d1	FALSE	FALSE	aldo-keto reductase family 1, member D1	326	1519	1	protein_coding	XP_021423331.1	gi|226442824|ref|NP_001139958.1|	96.93	326	10	0	1	326	1	326	0	660	XP_021423331.13-oxo-5-beta-steroid4-dehydrogenase[Oncorhynchusmykiss]	XP_021423331.13-oxo-5-beta-steroid4-dehydrogenase[Oncorhynchusmykiss]	12	12	12		1	12	12	12	10	10	12	11	11	11	10	10	10	9	11	10	10	12	11	11
XP_021423339.1	gene25164:106564313	XM_014130355.1	XP_013985830.1	LOC106564313	FALSE	TRUE	phosphoglycerate mutase 1	254	1754	1	protein_coding	XP_021423339.1	gi|929219343|ref|XP_013985830.1|	99.21	254	2	0	1	254	1	254	8e-150	528	XP_021423339.1phosphoglyceratemutase1[Oncorhynchusmykiss]	XP_021423339.1phosphoglyceratemutase1[Oncorhynchusmykiss]	13	9	9		1	13	9	9	12	11	11	10	11	11	9	10	8	8	12	8	7	8	8	7
XP_021423348.1	gene25198:106564349	XM_014130405.1	XP_013985880.1	LOC106564349	FALSE	TRUE	pyrroline-5-carboxylate reductase 1, mitochondrial-like	312	1107	1	protein_coding	XP_021423348.1	gi|929219440|ref|XP_013985880.1|	99.56	229	1	0	1	229	1	229	2e-129	460	XP_021423348.1pyrroline-5-carboxylatereductase1,mitochondrial-like,partial[Oncorhynchusmykiss];XP_021426077.1pyrroline-5-carboxylatereductase1,mitochondrial-like[Oncorhynchusmykiss]	XP_021423348.1pyrroline-5-carboxylatereductase1,mitochondrial-like,partial[Oncorhynchusmykiss]	9;2	9;2	5;0		2	9	9	5	9	9	8	8	8	8	9	9	9	8	8	9	9	8	8	8
XP_021423391.1	gene25411:106564561	XM_014130698.1	XP_013986173.1	LOC106564561	FALSE	FALSE	ATPase asna1-like	341	3012	1	protein_coding	XP_021423391.1	gi|929219980|ref|XP_013986173.1|	99.41	341	2	0	1	341	1	341	0	703	XP_021423391.1ATPaseasna1-like[Oncorhynchusmykiss];XP_021412491.1ATPaseasna1[Oncorhynchusmykiss];XP_021451619.1ATPaseasna1-like,partial[Oncorhynchusmykiss]	XP_021423391.1ATPaseasna1-like[Oncorhynchusmykiss];XP_021412491.1ATPaseasna1[Oncorhynchusmykiss]	6;6;1	6;6;1	6;6;1	;	3	6	6	6	5	6	5	6	6	6	6	6	6	6	6	5	6	5	6	6
XP_021423396.1	gene25417:106564567	XM_014130705.1	XP_013986180.1	LOC106564567	FALSE	FALSE	peroxiredoxin-1-like	197	1090	1	protein_coding	XP_021423396.1	gi|929219994|ref|XP_013986180.1|	97.97	197	4	0	1	197	1	197	1e-111	400	XP_021423396.1peroxiredoxin-1-like[Oncorhynchusmykiss];XP_021412504.1peroxiredoxin-1-like[Oncorhynchusmykiss];XP_021412503.1peroxiredoxin-1-like[Oncorhynchusmykiss];XP_021412502.1peroxiredoxin-1-like[Oncorhynchusmykiss];XP_021412501.1peroxiredoxin-1-like[Oncorhynchusmykiss]	XP_021423396.1peroxiredoxin-1-like[Oncorhynchusmykiss];XP_021412504.1peroxiredoxin-1-like[Oncorhynchusmykiss];XP_021412503.1peroxiredoxin-1-like[Oncorhynchusmykiss];XP_021412502.1peroxiredoxin-1-like[Oncorhynchusmykiss];XP_021412501.1peroxiredoxin-1-like[Oncorhynchusmykiss]	8;7;7;7;7	8;7;7;7;7	7;6;6;6;6	;;;;	5	8	8	7	8	8	8	7	8	8	7	8	8	8	8	8	8	8	7	8
XP_021423468.1	gene25440:100195658	NM_001140687.1	NP_001134159.1	rs15a	FALSE	FALSE	40S ribosomal protein S15a	130	628	1	protein_coding	XP_021423468.1	gi|213513493|ref|NP_001134159.1|	100	130	0	0	1	130	1	130	2e-72	269	XP_021423468.140SribosomalproteinS15a[Oncorhynchusmykiss];XP_021412560.140SribosomalproteinS15a[Oncorhynchusmykiss]	XP_021423468.140SribosomalproteinS15a[Oncorhynchusmykiss];XP_021412560.140SribosomalproteinS15a[Oncorhynchusmykiss]	5;5	5;5	5;5	;	2	5	5	5	5	5	5	5	5	5	4	4	4	5	5	5	5	5	5	5
XP_021423477.1	gene25460:100380663	XM_014130762.1	XP_013986237.1	LOC100380663	FALSE	FALSE	myosin-11	1980	7118	1	protein_coding	XP_021423477.1	gi|929220102|ref|XP_013986239.1|	99.39	1972	9	1	1	1969	1	1972	0	3857	XP_021423477.1myosin-11-likeisoformX3[Oncorhynchusmykiss];XP_021423476.1myosin-11-likeisoformX2[Oncorhynchusmykiss];XP_021423475.1myosin-11-likeisoformX1[Oncorhynchusmykiss]	XP_021423477.1myosin-11-likeisoformX3[Oncorhynchusmykiss];XP_021423476.1myosin-11-likeisoformX2[Oncorhynchusmykiss];XP_021423475.1myosin-11-likeisoformX1[Oncorhynchusmykiss]	22;22;19	1;1;1	1;1;1	;;	3	22	1	1	19	18	19	18	17	19	18	19	19	17	19	1	1	1	1	1
XP_021423530.1	gene4806:106586700	XM_014174258.1	XP_014029733.1	LOC106586700	FALSE	FALSE	elongation factor 1-alpha 1	462	3442	1	protein_coding	XP_021423530.1	gi|929067693|ref|XP_014029724.1|	99.13	462	4	0	1	462	1	462	0	945	XP_021423530.1elongationfactor1-alpha,somaticform-likeisoformX3[Oncorhynchusmykiss];XP_021423529.1elongationfactor1-alpha1-likeisoformX2[Oncorhynchusmykiss];XP_021423528.1elongationfactor1-alpha1-likeisoformX1[Oncorhynchusmykiss];XP_021466337.1elongationfactor1-alpha,somaticform[Oncorhynchusmykiss];XP_021436148.1elongationfactor1-alpha,somaticform-like[Oncorhynchusmykiss];XP_021436147.1elongation…	XP_021423530.1elongationfactor1-alpha,somaticform-likeisoformX3[Oncorhynchusmykiss];XP_021423529.1elongationfactor1-alpha1-likeisoformX2[Oncorhynchusmykiss];XP_021423528.1elongationfactor1-alpha1-likeisoformX1[Oncorhynchusmykiss];XP_021466337.1elongationfactor1-alpha,somaticform[Oncorhynchusmykiss];XP_021436148.1elongationfactor1-alpha,somaticform-like[Oncorhynchusmykiss];XP_021436147.1elongation…	8;8;8;7;7;7;4	1;1;1;1;1;1;0	1;1;1;1;1;1;0	;;;;;;	7	8	1	1	8	8	6	8	7	7	7	7	8	8	7	1	1	1	1	1
XP_021423534.1	gene21764:106560982	XM_014124484.1	XP_013979959.1	hdac10	FALSE	FALSE	histone deacetylase 10	687	2372	1	protein_coding	XP_021423534.1	gi|929124596|ref|XP_013979959.1|	97.53	687	17	0	1	687	1	687	0	1382	XP_021423534.1histonedeacetylase10[Oncorhynchusmykiss]	XP_021423534.1histonedeacetylase10[Oncorhynchusmykiss]	9	9	9		1	9	9	9	9	9	9	9	9	9	9	9	9	9	9	9	9	9	9	9
XP_021423566.1	gene4778:106586974	XM_014174762.1	XP_014030237.1	LOC106586974	FALSE	FALSE	40S ribosomal protein SA	317	1154	1	protein_coding	XP_021423566.1	gi|929067808|ref|XP_014030244.1|	100	311	0	0	1	311	1	311	0	645	XP_021423566.140SribosomalproteinSAisoformX2[Oncorhynchusmykiss];XP_021412649.140SribosomalproteinSAisoformX2[Oncorhynchusmykiss];XP_021423565.140SribosomalproteinSAisoformX1[Oncorhynchusmykiss];XP_021423564.140SribosomalproteinSAisoformX1[Oncorhynchusmykiss];XP_021412648.140SribosomalproteinSAisoformX1[Oncorhynchusmykiss]	XP_021423566.140SribosomalproteinSAisoformX2[Oncorhynchusmykiss];XP_021412649.140SribosomalproteinSAisoformX2[Oncorhynchusmykiss];XP_021423565.140SribosomalproteinSAisoformX1[Oncorhynchusmykiss];XP_021423564.140SribosomalproteinSAisoformX1[Oncorhynchusmykiss];XP_021412648.140SribosomalproteinSAisoformX1[Oncorhynchusmykiss]	15;15;15;15;15	15;15;15;15;15	6;6;6;6;6	;;;;	5	15	15	6	13	13	13	14	14	15	12	13	11	13	14	13	13	13	14	14
XP_021423608.1	gene4738:106587357	XM_014175705.1	XP_014031180.1	LOC106587357	FALSE	FALSE	ATP-dependent RNA helicase DDX39A	427	1687	1	protein_coding	XP_021423608.1	gi|929067984|ref|XP_014031180.1|	99.77	427	1	0	1	427	1	427	0	879	XP_021423608.1ATP-dependentRNAhelicaseDDX39A[Oncorhynchusmykiss];XP_021413832.1ATP-dependentRNAhelicaseDDX39A-like[Oncorhynchusmykiss];XP_021412707.1ATP-dependentRNAhelicaseDDX39A-like[Oncorhynchusmykiss];XP_021428433.1spliceosomeRNAhelicaseDDX39B[Oncorhynchusmykiss]	XP_021423608.1ATP-dependentRNAhelicaseDDX39A[Oncorhynchusmykiss];XP_021413832.1ATP-dependentRNAhelicaseDDX39A-like[Oncorhynchusmykiss];XP_021412707.1ATP-dependentRNAhelicaseDDX39A-like[Oncorhynchusmykiss]	15;15;15;5	15;15;15;5	1;1;1;0	;;	4	15	15	1	14	12	13	14	12	14	13	13	13	13	13	14	12	13	14	12
XP_021423642.1	gene25598:106564746	XM_014131064.1	XP_013986539.1	LOC106564746	FALSE	FALSE	puromycin-sensitive aminopeptidase-like	939	4800	1	protein_coding	XP_021423642.1	gi|929220661|ref|XP_013986543.1|	99.14	930	8	0	1	930	1	930	0	1919	XP_021423642.1puromycin-sensitiveaminopeptidase-likeisoformX2[Oncorhynchusmykiss];XP_021423641.1puromycin-sensitiveaminopeptidase-likeisoformX1[Oncorhynchusmykiss];XP_021412767.1puromycin-sensitiveaminopeptidase-like[Oncorhynchusmykiss]	XP_021423642.1puromycin-sensitiveaminopeptidase-likeisoformX2[Oncorhynchusmykiss];XP_021423641.1puromycin-sensitiveaminopeptidase-likeisoformX1[Oncorhynchusmykiss];XP_021412767.1puromycin-sensitiveaminopeptidase-like[Oncorhynchusmykiss]	22;22;20	22;22;20	22;22;20	;;	3	22	22	22	20	20	21	19	19	21	19	19	19	21	21	20	20	21	19	19
XP_021423702.1	gene25633:106564948	XM_014131496.1	XP_013986971.1	LOC106564948	FALSE	FALSE	proteasome subunit beta type-3-like	205	890	1	protein_coding	XP_021423702.1	gi|929221470|ref|XP_013986971.1|	100	205	0	0	1	205	1	205	7e-119	424	XP_021423702.1proteasomesubunitbetatype-3-like[Oncorhynchusmykiss]	XP_021423702.1proteasomesubunitbetatype-3-like[Oncorhynchusmykiss]	7	7	7		1	7	7	7	7	6	5	6	5	5	6	5	5	6	4	7	6	5	6	5
XP_021423708.1	gene25637:106564944	XM_014131489.1	XP_013986964.1	LOC106564944	FALSE	FALSE	secernin-2-like	422	1715	1	protein_coding	XP_021423708.1	gi|929221460|ref|XP_013986964.1|	99.05	422	4	0	1	422	1	422	0	872	XP_021423708.1secernin-2-like[Oncorhynchusmykiss];XP_021412815.1secernin-2-like[Oncorhynchusmykiss];XP_021412814.1secernin-2-like[Oncorhynchusmykiss]	XP_021423708.1secernin-2-like[Oncorhynchusmykiss];XP_021412815.1secernin-2-like[Oncorhynchusmykiss];XP_021412814.1secernin-2-like[Oncorhynchusmykiss]	8;8;8	8;8;8	8;8;8	;;	3	8	8	8	5	5	4	4	5	7	6	5	6	6	5	5	5	4	4	5
XP_021423720.1	gene25642:106564939	XM_014131478.1	XP_013986953.1	LOC106564939	FALSE	FALSE	group XIIB secretory phospholipase A2-like protein	209	1005	1	protein_coding	XP_021423720.1	gi|929221442|ref|XP_013986954.1|	98.05	205	4	0	1	205	1	205	3e-117	419	XP_021423720.1groupXIIBsecretoryphospholipaseA2-likeproteinisoformX2[Oncorhynchusmykiss];XP_021412825.1groupXIIBsecretoryphospholipaseA2-likeproteinisoformX2[Oncorhynchusmykiss];XP_021423719.1groupXIIBsecretoryphospholipaseA2-likeproteinisoformX1[Oncorhynchusmykiss];XP_021412824.1groupXIIBsecretoryphospholipaseA2-likeproteinisoformX1[Oncorhynchusmykiss]	XP_021423720.1groupXIIBsecretoryphospholipaseA2-likeproteinisoformX2[Oncorhynchusmykiss];XP_021412825.1groupXIIBsecretoryphospholipaseA2-likeproteinisoformX2[Oncorhynchusmykiss];XP_021423719.1groupXIIBsecretoryphospholipaseA2-likeproteinisoformX1[Oncorhynchusmykiss];XP_021412824.1groupXIIBsecretoryphospholipaseA2-likeproteinisoformX1[Oncorhynchusmykiss]	3;3;3;3	3;3;3;3	3;3;3;3	;;;	4	3	3	3	3	3	3	3	2	2	3	2	3	2	3	3	3	3	3	2
XP_021423726.1	gene4650:106588093	XM_014176765.1	XP_014032240.1	p4hb	FALSE	FALSE	prolyl 4-hydroxylase, beta polypeptide	512	3300	1	protein_coding	XP_021423726.1	gi|929068245|ref|XP_014032240.1|	97.39	498	13	0	1	498	1	498	0	962	XP_021423726.1proteindisulfide-isomerase-like[Oncorhynchusmykiss]	XP_021423726.1proteindisulfide-isomerase-like[Oncorhynchusmykiss]	25	7	7		1	25	7	7	25	25	23	22	25	25	23	25	23	24	25	7	7	7	6	7
XP_021423733.1	gene25657:106564921	XM_014131435.1	XP_013986910.1	LOC106564921	FALSE	FALSE	regulatory-associated protein of mTOR-like	1373	7129	1	protein_coding	XP_021423733.1	gi|929221367|ref|XP_013986915.1|	99.41	1348	8	0	1	1348	1	1348	0	2787	XP_021423733.1regulatory-associatedproteinofmTOR-like[Oncorhynchusmykiss];XP_021412859.1regulatory-associatedproteinofmTOR-like[Oncorhynchusmykiss]	XP_021423733.1regulatory-associatedproteinofmTOR-like[Oncorhynchusmykiss];XP_021412859.1regulatory-associatedproteinofmTOR-like[Oncorhynchusmykiss]	4;4	4;4	3;3	;	2	4	4	3	3	3	4	4	4	3	4	4	4	3	4	3	3	4	4	4
XP_021423734.1	gene21780:106560970	XM_014124459.1	XP_013979934.1	LOC106560970	FALSE	FALSE	twinfilin-1-like	350	2107	1	protein_coding	XP_021423734.1	gi|929124548|ref|XP_013979934.1|	98.85	349	4	0	1	349	1	349	0	720	XP_021423734.1twinfilin-1-like[Oncorhynchusmykiss]	XP_021423734.1twinfilin-1-like[Oncorhynchusmykiss]	5	4	3		1	5	4	3	5	3	4	5	3	5	5	5	4	5	3	4	3	3	4	3
XP_021423747.1	gene25674:100380782	XM_014131412.1	XP_013986887.1	LOC100380782	FALSE	FALSE	peroxisomal acyl-coenzyme A oxidase 1	660	3894	1	protein_coding	XP_021423747.1	gi|929221315|ref|XP_013986887.1|	98.18	660	12	0	1	660	1	660	0	1357	XP_021423747.1peroxisomalacyl-coenzymeAoxidase1-likeisoformX2[Oncorhynchusmykiss];XP_021423746.1peroxisomalacyl-coenzymeAoxidase1-likeisoformX1[Oncorhynchusmykiss]	XP_021423747.1peroxisomalacyl-coenzymeAoxidase1-likeisoformX2[Oncorhynchusmykiss];XP_021423746.1peroxisomalacyl-coenzymeAoxidase1-likeisoformX1[Oncorhynchusmykiss]	27;26	9;9	9;9	;	2	27	9	9	26	25	25	24	23	27	24	24	25	24	26	8	7	7	7	6
XP_021423749.1	gene25677:106564907	XM_014131408.1	XP_013986883.1	LOC106564907	FALSE	FALSE	signal recognition particle subunit SRP68-like	617	3539	1	protein_coding	XP_021423749.1	gi|929221309|ref|XP_013986884.1|	98.49	597	9	0	1	597	1	597	0	1223	XP_021423749.1signalrecognitionparticlesubunitSRP68-like[Oncorhynchusmykiss]	XP_021423749.1signalrecognitionparticlesubunitSRP68-like[Oncorhynchusmykiss]	12	2	2		1	12	2	2	11	11	11	12	11	11	11	10	10	10	11	2	2	2	2	2
XP_021423757.1	gene25679:106564904	XM_014131404.1	XP_013986879.1	LOC106564904	FALSE	FALSE	probable ATP-dependent RNA helicase DDX5	627	2417	1	protein_coding	XP_021423757.1	gi|929221299|ref|XP_013986879.1|	99.79	480	1	0	1	480	1	480	0	948	XP_021423757.1probableATP-dependentRNAhelicaseDDX5isoformX4[Oncorhynchusmykiss];XP_021412891.1probableATP-dependentRNAhelicaseDDX5[Oncorhynchusmykiss];XP_021423755.1probableATP-dependentRNAhelicaseDDX5isoformX3[Oncorhynchusmykiss];XP_021423754.1probableATP-dependentRNAhelicaseDDX5isoformX2[Oncorhynchusmykiss];XP_021423753.1probableATP-dependentRNAhelicaseDDX5isoformX1[Oncorhynchusmykiss]	XP_021423757.1probableATP-dependentRNAhelicaseDDX5isoformX4[Oncorhynchusmykiss];XP_021412891.1probableATP-dependentRNAhelicaseDDX5[Oncorhynchusmykiss];XP_021423755.1probableATP-dependentRNAhelicaseDDX5isoformX3[Oncorhynchusmykiss];XP_021423754.1probableATP-dependentRNAhelicaseDDX5isoformX2[Oncorhynchusmykiss];XP_021423753.1probableATP-dependentRNAhelicaseDDX5isoformX1[Oncorhynchusmykiss]	10;10;10;10;10	2;2;2;2;2	2;2;2;2;2	;;;;	5	10	2	2	8	8	7	8	7	9	6	6	8	7	7	1	2	2	1	2
XP_021423764.1	gene25684:106564899	XM_014131394.1	XP_013986869.1	LOC106564899	FALSE	FALSE	nascent polypeptide-associated complex subunit alpha, muscle-specific form-like	1447	6954	1	protein_coding	XP_021423764.1	gi|929221279|ref|XP_013986868.1|	90.61	1150	72	12	1	1129	1	1135	0	1780	XP_021423764.1nascentpolypeptide-associatedcomplexsubunitalpha,muscle-specificform-like[Oncorhynchusmykiss]	XP_021423764.1nascentpolypeptide-associatedcomplexsubunitalpha,muscle-specificform-like[Oncorhynchusmykiss]	2	2	2		1	2	2	2	1	1	2	2	1	1	2	2	1	1	2	1	1	2	2	1
XP_021423766.1	gene25687:106564993	XM_014131547.1	XP_013987022.1	LOC106564993	FALSE	FALSE	N-acetylmuramoyl-L-alanine amidase-like	482	1741	1	protein_coding	XP_021423766.1	gi|929221565|ref|XP_013987022.1|	96.68	482	16	0	1	482	1	482	0	969	XP_021423766.1N-acetylmuramoyl-L-alanineamidase-like[Oncorhynchusmykiss]	XP_021423766.1N-acetylmuramoyl-L-alanineamidase-like[Oncorhynchusmykiss]	2	2	2		1	2	2	2	1	1	1	1	1	2	0	1	1	0	1	1	1	1	1	1
XP_021423790.1	gene25703:106564882	XM_014131368.1	XP_013986843.1	LOC106564882	FALSE	FALSE	protein kinase C alpha type	694	6068	1	protein_coding	XP_021423790.1	gi|929221235|ref|XP_013986846.1|	98.96	673	7	0	1	673	1	673	0	1395	XP_021423790.1proteinkinaseCalphatypeisoformX2[Oncorhynchusmykiss];XP_021423789.1proteinkinaseCalphatypeisoformX1[Oncorhynchusmykiss]	XP_021423790.1proteinkinaseCalphatypeisoformX2[Oncorhynchusmykiss];XP_021423789.1proteinkinaseCalphatypeisoformX1[Oncorhynchusmykiss]	6;6	1;1	1;1	;	2	6	1	1	6	5	5	4	5	5	4	5	5	5	5	1	1	1	1	1
XP_021423793.1	gene25701:106564885	XM_014131373.1	XP_013986848.1	LOC106564885	FALSE	FALSE	beta-2-glycoprotein 1-like	351	1209	1	protein_coding	XP_021423793.1	gi|929221241|ref|XP_013986849.1|	78.96	347	28	1	1	302	1	347	3e-149	526	XP_021423793.1beta-2-glycoprotein1-likeisoformX2[Oncorhynchusmykiss];XP_021423792.1beta-2-glycoprotein1-likeisoformX1[Oncorhynchusmykiss]	XP_021423793.1beta-2-glycoprotein1-likeisoformX2[Oncorhynchusmykiss];XP_021423792.1beta-2-glycoprotein1-likeisoformX1[Oncorhynchusmykiss]	2;2	2;2	2;2	;	2	2	2	2	1	2	1	2	1	2	1	2	0	1	2	1	2	1	2	1
XP_021423799.1	gene25709:100196747	NM_001141769.1	NP_001135241.1	psd12	FALSE	FALSE	26S proteasome non-ATPase regulatory subunit 12	462	1869	1	protein_coding	XP_021423799.1	gi|213514570|ref|NP_001135241.1|	99.78	462	1	0	1	462	1	462	0	949	XP_021423799.126Sproteasomenon-ATPaseregulatorysubunit12[Oncorhynchusmykiss];XP_021412935.126Sproteasomenon-ATPaseregulatorysubunit12-like[Oncorhynchusmykiss]	XP_021423799.126Sproteasomenon-ATPaseregulatorysubunit12[Oncorhynchusmykiss];XP_021412935.126Sproteasomenon-ATPaseregulatorysubunit12-like[Oncorhynchusmykiss]	8;7	8;7	8;7	;	2	8	8	8	8	8	8	8	8	8	8	8	8	8	8	8	8	8	8	8
XP_021423801.1	gene25710:106564871	XM_014131349.1	XP_013986824.1	LOC106564871	FALSE	FALSE	cytoplasmic phosphatidylinositol transfer protein 1-like	347	5679	1	protein_coding	XP_021423801.1	gi|929221198|ref|XP_013986825.1|	98.55	275	4	0	1	275	1	275	7e-163	571	XP_021423801.1cytoplasmicphosphatidylinositoltransferprotein1-likeisoformX2[Oncorhynchusmykiss];XP_021412936.1cytoplasmicphosphatidylinositoltransferprotein1-like[Oncorhynchusmykiss];XP_021423800.1cytoplasmicphosphatidylinositoltransferprotein1-likeisoformX1[Oncorhynchusmykiss]	XP_021423801.1cytoplasmicphosphatidylinositoltransferprotein1-likeisoformX2[Oncorhynchusmykiss];XP_021412936.1cytoplasmicphosphatidylinositoltransferprotein1-like[Oncorhynchusmykiss];XP_021423800.1cytoplasmicphosphatidylinositoltransferprotein1-likeisoformX1[Oncorhynchusmykiss]	6;6;6	6;6;6	6;6;6	;;	3	6	6	6	6	5	6	5	4	5	5	4	5	5	5	6	5	6	5	4
XP_021423812.1	gene25725:100380723	XM_014131338.1	XP_013986813.1	LOC100380723	FALSE	FALSE	exportin-1	1070	4612	1	protein_coding	XP_021423812.1	gi|929221176|ref|XP_013986813.1|	100	1070	0	0	1	1070	1	1070	0	2233	XP_021423812.1exportin-1[Oncorhynchusmykiss];XP_021423811.1exportin-1[Oncorhynchusmykiss];XP_021411862.1exportin-1-like[Oncorhynchusmykiss]	XP_021423812.1exportin-1[Oncorhynchusmykiss];XP_021423811.1exportin-1[Oncorhynchusmykiss];XP_021411862.1exportin-1-like[Oncorhynchusmykiss]	10;10;9	10;10;9	10;10;9	;;	3	10	10	10	10	7	7	7	6	9	7	7	6	6	6	10	7	7	7	6
XP_021423823.1	gene4550:106585868	XM_014172587.1	XP_014028062.1	LOC106585868	FALSE	FALSE	malate dehydrogenase, cytoplasmic-like	350	1374	1	protein_coding	XP_021423823.1	gi|929067403|ref|XP_014028070.1|	98.8	333	4	0	1	333	1	333	0	683	XP_021423823.1malatedehydrogenase,cytoplasmicisoformX2[Oncorhynchusmykiss];XP_021423822.1malatedehydrogenase,cytoplasmicisoformX1[Oncorhynchusmykiss]	XP_021423823.1malatedehydrogenase,cytoplasmicisoformX2[Oncorhynchusmykiss];XP_021423822.1malatedehydrogenase,cytoplasmicisoformX1[Oncorhynchusmykiss]	12;12	12;12	2;2	;	2	12	12	2	12	12	12	12	12	12	12	12	12	12	12	12	12	12	12	12
XP_021423825.1	gene25736:100195257	XM_014131112.1	XP_013986587.1	ugpa	FALSE	FALSE	UTP--glucose-1-phosphate uridylyltransferase	503	2179	1	protein_coding	XP_021423825.1	gi|929220748|ref|XP_013986587.1|	99.8	503	1	0	1	503	1	503	0	1030	XP_021423825.1UTP--glucose-1-phosphateuridylyltransferase-likeisoformX1[Oncorhynchusmykiss];XP_021423828.1UTP--glucose-1-phosphateuridylyltransferase-likeisoformX2[Oncorhynchusmykiss];XP_021423827.1UTP--glucose-1-phosphateuridylyltransferase-likeisoformX2[Oncorhynchusmykiss];XP_021423826.1UTP--glucose-1-phosphateuridylyltransferase-likeisoformX2[Oncorhynchusmykiss]	XP_021423825.1UTP--glucose-1-phosphateuridylyltransferase-likeisoformX1[Oncorhynchusmykiss];XP_021423828.1UTP--glucose-1-phosphateuridylyltransferase-likeisoformX2[Oncorhynchusmykiss];XP_021423827.1UTP--glucose-1-phosphateuridylyltransferase-likeisoformX2[Oncorhynchusmykiss];XP_021423826.1UTP--glucose-1-phosphateuridylyltransferase-likeisoformX2[Oncorhynchusmykiss]	19;18;18;18	19;18;18;18	3;2;2;2	;;;	4	19	19	3	18	19	18	19	19	18	19	19	18	19	19	18	19	18	19	19
XP_021423832.1	gene25742:106564850	XM_014131311.1	XP_013986786.1	LOC106564850	FALSE	FALSE	ras-related protein ORAB-1	202	1937	1	protein_coding	XP_021423832.1	gi|929221126|ref|XP_013986786.1|	99.5	202	1	0	1	202	1	202	1e-116	417	XP_021423832.1ras-relatedproteinORAB-1-like[Oncorhynchusmykiss]	XP_021423832.1ras-relatedproteinORAB-1-like[Oncorhynchusmykiss]	6	6	1		1	6	6	1	6	5	6	5	4	6	6	5	4	5	5	6	5	6	5	4
XP_021423834.1	gene4542:106585927	XM_014172672.1	XP_014028147.1	LOC106585927	FALSE	FALSE	actin-related protein 2-A	394	2846	1	protein_coding	XP_021423834.1	gi|929067419|ref|XP_014028147.1|	99.75	394	1	0	1	394	1	394	0	811	XP_021423834.1actin-relatedprotein2-A-like[Oncorhynchusmykiss];XP_021412983.1actin-relatedprotein2-A[Oncorhynchusmykiss];XP_021470382.1actin-relatedprotein2-A-like,partial[Oncorhynchusmykiss];XP_021470542.1actin-relatedprotein2-like[Oncorhynchusmykiss]	XP_021423834.1actin-relatedprotein2-A-like[Oncorhynchusmykiss];XP_021412983.1actin-relatedprotein2-A[Oncorhynchusmykiss];XP_021470382.1actin-relatedprotein2-A-like,partial[Oncorhynchusmykiss]	8;8;5;1	8;8;5;1	8;8;5;1	;;	4	8	8	8	7	7	8	7	8	8	5	7	7	7	7	7	7	8	7	8
XP_021423866.1	gene25753:100286438	NM_001146377.1	NP_001139849.1	ru2b	FALSE	TRUE	U2 small nuclear ribonucleoprotein B	219	941	1	protein_coding	XP_021423866.1	gi|226443332|ref|NP_001139849.1|	99.54	219	1	0	1	219	1	219	1e-126	451	XP_021423866.1U2smallnuclearribonucleoproteinB''-like[Oncorhynchusmykiss];XP_021423865.1U2smallnuclearribonucleoproteinB''-like[Oncorhynchusmykiss];XP_021413006.1U2smallnuclearribonucleoproteinB''[Oncorhynchusmykiss];XP_021413005.1U2smallnuclearribonucleoproteinB''[Oncorhynchusmykiss]	XP_021423866.1U2smallnuclearribonucleoproteinB''-like[Oncorhynchusmykiss];XP_021423865.1U2smallnuclearribonucleoproteinB''-like[Oncorhynchusmykiss];XP_021413006.1U2smallnuclearribonucleoproteinB''[Oncorhynchusmykiss];XP_021413005.1U2smallnuclearribonucleoproteinB''[Oncorhynchusmykiss]	2;2;2;2	2;2;2;2	2;2;2;2	;;;	4	2	2	2	0	1	1	2	0	1	0	0	1	2	1	0	1	1	2	0
XP_021423870.1	gene25758:106564835	XM_014131270.1	XP_013986745.1	LOC106564835	FALSE	FALSE	ERO1-like protein beta	491	4014	1	protein_coding	XP_021423870.1	gi|929221050|ref|XP_013986746.1|	99.13	459	4	0	1	459	1	459	0	951	XP_021423870.1ERO1-likeproteinbetaisoformX2[Oncorhynchusmykiss];XP_021413015.1ERO1-likeproteinbetaisoformX2[Oncorhynchusmykiss];XP_021423869.1ERO1-likeproteinbetaisoformX1[Oncorhynchusmykiss];XP_021413014.1ERO1-likeproteinbetaisoformX1[Oncorhynchusmykiss]	XP_021423870.1ERO1-likeproteinbetaisoformX2[Oncorhynchusmykiss];XP_021413015.1ERO1-likeproteinbetaisoformX2[Oncorhynchusmykiss];XP_021423869.1ERO1-likeproteinbetaisoformX1[Oncorhynchusmykiss];XP_021413014.1ERO1-likeproteinbetaisoformX1[Oncorhynchusmykiss]	4;4;4;4	4;4;4;4	4;4;4;4	;;;	4	4	4	4	4	4	4	4	4	4	4	4	4	4	4	4	4	4	4	4
XP_021423874.1	gene4526:106586122	XM_014173017.1	XP_014028492.1	LOC106586122	FALSE	FALSE	vitamin D(3) 25-hydroxylase-like	491	2013	1	protein_coding	XP_021423874.1	gi|929067503|ref|XP_014028492.1|	90.63	491	46	0	1	491	1	491	0	904	XP_021423874.1cytochromeP4502B4-like[Oncorhynchusmykiss]	XP_021423874.1cytochromeP4502B4-like[Oncorhynchusmykiss]	9	7	4		1	9	7	4	4	4	6	3	8	7	8	5	7	1	1	3	2	5	2	6
XP_021423876.1	gene25763:106564830	XM_014131265.1	XP_013986740.1	LOC106564830	FALSE	FALSE	complement C3-like	1652	5214	1	protein_coding	XP_021423876.1	gi|929221039|ref|XP_013986740.1|	90.68	1653	153	1	1	1653	1	1652	0	3085	XP_021423876.1complementC3-like[Oncorhynchusmykiss]	XP_021423876.1complementC3-like[Oncorhynchusmykiss]	55	55	47		1	55	55	47	52	49	49	47	39	53	39	45	41	42	45	52	49	49	47	39
XP_021423888.1	gene25773:106564824	XM_014131256.1	XP_013986731.1	LOC106564824	FALSE	FALSE	catalase-like	524	2820	1	protein_coding	XP_021423888.1	gi|929221021|ref|XP_013986731.1|	97.89	521	11	0	1	521	1	521	0	1078	XP_021423888.1catalase-like[Oncorhynchusmykiss]	XP_021423888.1catalase-like[Oncorhynchusmykiss]	26	26	6		1	26	26	6	26	25	26	25	24	26	24	26	26	25	26	26	25	26	25	24
XP_021423912.1	gene25797:106564808	XM_014131226.1	XP_013986701.1	LOC106564808	FALSE	FALSE	kinesin light chain 1-like	618	2366	1	protein_coding	XP_021423912.1	gi|929220968|ref|XP_013986702.1|	99.81	529	1	0	1	529	1	529	0	1083	XP_021423912.1kinesinlightchain1-likeisoformX2[Oncorhynchusmykiss];XP_021461803.1kinesinlightchain1-likeisoformX8[Oncorhynchusmykiss];XP_021461795.1kinesinlightchain1-likeisoformX7[Oncorhynchusmykiss];XP_021461785.1kinesinlightchain1-likeisoformX6[Oncorhynchusmykiss];XP_021461776.1kinesinlightchain1-likeisoformX5[Oncorhynchusmykiss];XP_021423910.1kinesinlightchain1-likeisoformX1[Oncorhynchusmykis…	XP_021423912.1kinesinlightchain1-likeisoformX2[Oncorhynchusmykiss];XP_021461803.1kinesinlightchain1-likeisoformX8[Oncorhynchusmykiss];XP_021461795.1kinesinlightchain1-likeisoformX7[Oncorhynchusmykiss];XP_021461785.1kinesinlightchain1-likeisoformX6[Oncorhynchusmykiss];XP_021461776.1kinesinlightchain1-likeisoformX5[Oncorhynchusmykiss];XP_021423910.1kinesinlightchain1-likeisoformX1[Oncorhynchusmykis…	2;2;2;2;2;2;2;2;2;2;2;2;2;2;1;1;1;1;1;1;1;1;1;1;1;1;1;1;1;1;1;1;1	2;2;2;2;2;2;2;2;2;2;2;2;2;2;1;1;1;1;1;1;1;1;1;1;1;1;1;1;1;1;1;1;1	1;1;1;1;1;1;1;1;1;1;1;1;1;1;0;0;0;0;0;0;0;0;0;0;0;0;0;0;0;0;0;0;0	;;;;;;;;;;;;;;;;;;;;;;;;;;;;;;;;	33	2	2	1	2	2	1	1	1	2	2	1	2	2	2	2	2	1	1	1
XP_021423951.1	gene18344:106611396	XM_014211566.1	XP_014067041.1	LOC106611396	FALSE	FALSE	uncharacterized LOC106611396	235	925	1	protein_coding	XP_021423951.1	gi|929111454|ref|XP_014067041.1|	43.75	240	111	8	9	229	1	235	5e-45	179	XP_021423951.1uncharacterizedproteinLOC110493791isoformX2[Oncorhynchusmykiss];XP_021423950.1uncharacterizedproteinLOC110493791isoformX1[Oncorhynchusmykiss]	XP_021423951.1uncharacterizedproteinLOC110493791isoformX2[Oncorhynchusmykiss];XP_021423950.1uncharacterizedproteinLOC110493791isoformX1[Oncorhynchusmykiss]	6;6	6;6	6;6	;	2	6	6	6	5	5	4	6	3	4	2	2	2	2	1	5	5	4	6	3
XP_021423963.1	gene4440:100195929	NM_001140958.1	NP_001134430.1	if4a3	FALSE	FALSE	Eukaryotic initiation factor 4A-III	406	1538	1	protein_coding	XP_021423963.1	gi|213511116|ref|NP_001134430.1|	100	406	0	0	1	406	1	406	0	839	XP_021423963.1eukaryoticinitiationfactor4A-III[Oncorhynchusmykiss];XP_021413100.1eukaryoticinitiationfactor4A-III-like[Oncorhynchusmykiss]	XP_021423963.1eukaryoticinitiationfactor4A-III[Oncorhynchusmykiss];XP_021413100.1eukaryoticinitiationfactor4A-III-like[Oncorhynchusmykiss]	7;7	6;6	6;6	;	2	7	6	6	7	6	6	6	5	7	7	7	6	6	6	6	5	5	5	4
XP_021423984.1	gene25841:106564771	XM_014131124.1	XP_013986599.1	rrbp1	FALSE	FALSE	ribosome binding protein 1	1147	4035	1	protein_coding	XP_021423984.1	gi|929220769|ref|XP_013986600.1|	92.38	1129	39	5	1	1094	23	1139	0	1856	XP_021423984.1ribosome-bindingprotein1isoformX1[Oncorhynchusmykiss];REV__XP_021469854.1p21-activatedproteinkinase-interactingprotein1isoformX4[Oncorhynchusmykiss];REV__XP_021469853.1p21-activatedproteinkinase-interactingprotein1isoformX3[Oncorhynchusmykiss];REV__XP_021469852.1p21-activatedproteinkinase-interactingprotein1isoformX2[Oncorhynchusmykiss];REV__XP_021469851.1p21-activatedproteinkinase-…	XP_021423984.1ribosome-bindingprotein1isoformX1[Oncorhynchusmykiss]	37;1;1;1;1	1;0;0;0;0	1;0;0;0;0		5	37	1	1	36	32	33	33	29	35	28	32	27	31	30	1	1	1	1	1
XP_021423985.1	gene25841:106564771	XM_014131124.1	XP_013986599.1	rrbp1	FALSE	FALSE	ribosome binding protein 1	1147	4035	1	protein_coding	XP_021423985.1	gi|929220775|ref|XP_013986603.1|	92.23	1107	39	5	1	1072	23	1117	0	1813	XP_021423985.1ribosome-bindingprotein1isoformX2[Oncorhynchusmykiss]	XP_021423985.1ribosome-bindingprotein1isoformX2[Oncorhynchusmykiss]	37	37	1		1	37	37	1	36	32	33	33	29	35	28	32	27	31	30	36	32	33	33	29
XP_021423989.1	gene4421:106584953	XM_014170652.1	XP_014026127.1	LOC106584953	FALSE	FALSE	spectrin beta chain, non-erythrocytic 1-like	2380	8540	1	protein_coding	XP_021423989.1	gi|929067084|ref|XP_014026116.1|	97.36	2350	62	0	1	2350	1	2350	0	4612	XP_021423989.1spectrinbetachain,non-erythrocytic1[Oncorhynchusmykiss];XP_021413048.1spectrinbetachain,non-erythrocytic1-likeisoformX2[Oncorhynchusmykiss];XP_021413047.1spectrinbetachain,non-erythrocytic1-likeisoformX1[Oncorhynchusmykiss];XP_021436387.1spectrinbetachain,non-erythrocytic1-likeisoformX1[Oncorhynchusmykiss];XP_021468670.1spectrinbetachain,non-erythrocytic1-likeisoformX2[Oncorhynchusm…	XP_021423989.1spectrinbetachain,non-erythrocytic1[Oncorhynchusmykiss];XP_021413048.1spectrinbetachain,non-erythrocytic1-likeisoformX2[Oncorhynchusmykiss];XP_021413047.1spectrinbetachain,non-erythrocytic1-likeisoformX1[Oncorhynchusmykiss];XP_021436387.1spectrinbetachain,non-erythrocytic1-likeisoformX1[Oncorhynchusmykiss];XP_021468670.1spectrinbetachain,non-erythrocytic1-likeisoformX2[Oncorhynchusm…	7;5;5;4;4;4;4;1	5;3;3;2;2;2;2;1	5;3;3;2;2;2;2;1	;;;;;;	8	7	5	5	6	6	7	7	6	6	7	6	7	7	7	4	4	5	5	4
XP_021423991.1	gene25866:100196895	NM_001141916.1	NP_001135388.1	bdh2	FALSE	FALSE	3-hydroxybutyrate dehydrogenase, type 2	245	1280	1	protein_coding	XP_021423991.1	gi|213511112|ref|NP_001135388.1|	98.78	245	3	0	1	245	1	245	7e-143	504	XP_021423991.13-hydroxybutyratedehydrogenasetype2[Oncorhynchusmykiss]	XP_021423991.13-hydroxybutyratedehydrogenasetype2[Oncorhynchusmykiss]	5	5	5		1	5	5	5	4	4	4	4	5	4	5	4	5	5	5	4	4	4	4	5
XP_021424017.1	gene25848:106565016	XM_014131581.1	XP_013987056.1	LOC106565016	FALSE	FALSE	RNA-binding protein 39-like	529	2556	1	protein_coding	XP_021424017.1	gi|929221639|ref|XP_013987060.1|	100	505	0	0	1	505	1	505	0	1048	XP_021424017.1RNA-bindingprotein39-likeisoformX5[Oncorhynchusmykiss];XP_021424013.1RNA-bindingprotein39-likeisoformX2[Oncorhynchusmykiss];XP_021424018.1RNA-bindingprotein39-likeisoformX6[Oncorhynchusmykiss];XP_021424015.1RNA-bindingprotein39-likeisoformX4[Oncorhynchusmykiss];XP_021424014.1RNA-bindingprotein39-likeisoformX3[Oncorhynchusmykiss];XP_021424012.1RNA-bindingprotein39-likeisoformX1[Oncor…	XP_021424017.1RNA-bindingprotein39-likeisoformX5[Oncorhynchusmykiss];XP_021424013.1RNA-bindingprotein39-likeisoformX2[Oncorhynchusmykiss];XP_021424018.1RNA-bindingprotein39-likeisoformX6[Oncorhynchusmykiss];XP_021424015.1RNA-bindingprotein39-likeisoformX4[Oncorhynchusmykiss];XP_021424014.1RNA-bindingprotein39-likeisoformX3[Oncorhynchusmykiss];XP_021424012.1RNA-bindingprotein39-likeisoformX1[Oncor…	4;4;3;3;3;3;3;2;1;1;1	4;4;3;3;3;3;3;2;1;1;1	2;2;2;2;2;2;2;1;1;1;1	;;;;;;;	11	4	4	2	3	3	2	2	2	2	2	3	2	3	3	3	3	2	2	2
XP_021424021.1	gene25852:106565014	XM_014131573.1	XP_013987048.1	LOC106565014	FALSE	FALSE	sulfotransferase 6B1-like	328	1693	1	protein_coding	XP_021424021.1	gi|929221617|ref|XP_013987048.1|	96.33	300	11	0	1	300	29	328	1e-173	607	XP_021424021.1sulfotransferase6B1-like[Oncorhynchusmykiss];XP_021424197.1sulfotransferase6B1-like[Oncorhynchusmykiss];XP_021436398.1sulfotransferase6B1-like[Oncorhynchusmykiss];XP_021468702.1sulfotransferase6B1-like[Oncorhynchusmykiss]	XP_021424021.1sulfotransferase6B1-like[Oncorhynchusmykiss]	8;2;1;1	8;2;1;1	8;2;1;1		4	8	8	8	8	7	8	7	6	8	7	7	8	8	7	8	7	8	7	6
XP_021424037.1	gene25879:106565032	XM_014131610.1	XP_013987085.1	LOC106565032	FALSE	FALSE	copine-3-like	534	4657	1	protein_coding	XP_021424037.1	gi|929221686|ref|XP_013987085.1|	97.75	534	12	0	1	534	1	534	0	1063	XP_021424037.1copine-3-likeisoformX1[Oncorhynchusmykiss];XP_021424036.1copine-3-likeisoformX1[Oncorhynchusmykiss]	XP_021424037.1copine-3-likeisoformX1[Oncorhynchusmykiss];XP_021424036.1copine-3-likeisoformX1[Oncorhynchusmykiss]	21;21	21;21	3;3	;	2	21	21	3	20	21	20	20	20	21	20	20	18	21	19	20	21	20	20	20
XP_021424038.1	gene25879:106565032	XM_014131610.1	XP_013987085.1	LOC106565032	FALSE	FALSE	copine-3-like	534	4657	1	protein_coding	XP_021424038.1	gi|929221688|ref|XP_013987086.1|	97.75	533	12	0	1	533	1	533	0	1060	XP_021424038.1copine-3-likeisoformX2[Oncorhynchusmykiss]	XP_021424038.1copine-3-likeisoformX2[Oncorhynchusmykiss]	19	1	1		1	19	1	1	18	19	18	18	17	19	17	18	15	18	17	1	1	1	1	0
XP_021424045.1	gene25887:106565036	XM_014131622.1	XP_013987097.1	spag1	FALSE	FALSE	sperm associated antigen 1	302	1540	1	protein_coding	XP_021424045.1	gi|929221708|ref|XP_013987097.1|	94.04	302	18	0	1	302	1	302	5e-166	582	XP_021424045.1mitochondrialimportreceptorsubunitTOM34-like[Oncorhynchusmykiss]	XP_021424045.1mitochondrialimportreceptorsubunitTOM34-like[Oncorhynchusmykiss]	3	2	2		1	3	2	2	2	2	2	3	1	1	1	2	2	2	1	1	1	1	2	1
XP_021424047.1	gene25888:106565037	XM_014131624.1	XP_013987099.1	ywhaz	FALSE	FALSE	tyrosine 3-monooxygenase/tryptophan 5-monooxygenase activation protein, zeta	244	2590	1	protein_coding	XP_021424047.1	gi|929221710|ref|XP_013987099.1|	100	244	0	0	1	244	1	244	4e-141	499	XP_021424047.114-3-3proteinbeta/alpha-1-like[Oncorhynchusmykiss]	XP_021424047.114-3-3proteinbeta/alpha-1-like[Oncorhynchusmykiss]	15	15	13		1	15	15	13	12	12	14	14	13	13	14	14	14	14	14	12	12	14	14	13
XP_021424108.1	gene25908:106565058	XM_014131679.1	XP_013987154.1	LOC106565058	FALSE	FALSE	eukaryotic translation initiation factor 2 subunit 2-like	334	1268	1	protein_coding	XP_021424108.1	gi|929221821|ref|XP_013987154.1|	99.4	334	2	0	1	334	1	334	0	682	XP_021424108.1eukaryotictranslationinitiationfactor2subunit2-like[Oncorhynchusmykiss];XP_021471338.1eukaryotictranslationinitiationfactor2subunit2-like[Oncorhynchusmykiss]	XP_021424108.1eukaryotictranslationinitiationfactor2subunit2-like[Oncorhynchusmykiss]	3;1	3;1	3;1		2	3	3	3	3	3	3	3	3	3	3	3	3	3	3	3	3	3	3	3
XP_021424196.1	gene10255:106603705	XM_014197705.1	XP_014053180.1	LOC106603705	FALSE	FALSE	histone H3.3	136	2671	1	protein_coding	XP_021424196.1	gi|929085182|ref|XP_014053180.1|	97.06	136	4	0	1	136	1	136	5e-72	267	XP_021424196.1histoneH3[Oncorhynchusmykiss];XP_021448898.1histoneH3-like,partial[Oncorhynchusmykiss];XP_021449370.1histoneH3-like[Oncorhynchusmykiss];XP_021424010.1histoneH3-like[Oncorhynchusmykiss];XP_021426113.1histoneH3-like[Oncorhynchusmykiss]	XP_021424196.1histoneH3[Oncorhynchusmykiss];XP_021448898.1histoneH3-like,partial[Oncorhynchusmykiss];XP_021449370.1histoneH3-like[Oncorhynchusmykiss];XP_021424010.1histoneH3-like[Oncorhynchusmykiss];XP_021426113.1histoneH3-like[Oncorhynchusmykiss]	4;4;4;4;2	4;4;4;4;2	1;1;1;1;1	;;;;	5	4	4	1	3	3	3	3	4	3	3	3	3	3	3	3	3	3	3	4
XP_021424220.1	gene25984:106565250	XM_014132148.1	XP_013987623.1	mtmr14	FALSE	FALSE	myotubularin related protein 14	648	6082	1	protein_coding	XP_021424220.1	gi|929222692|ref|XP_013987625.1|	98.15	593	10	1	1	592	1	593	0	1191	XP_021424220.1myotubularin-relatedprotein14-likeisoformX2[Oncorhynchusmykiss];XP_021424219.1myotubularin-relatedprotein14-likeisoformX1[Oncorhynchusmykiss];XP_021466293.1myotubularin-relatedprotein14-like[Oncorhynchusmykiss]	XP_021424220.1myotubularin-relatedprotein14-likeisoformX2[Oncorhynchusmykiss];XP_021424219.1myotubularin-relatedprotein14-likeisoformX1[Oncorhynchusmykiss];XP_021466293.1myotubularin-relatedprotein14-like[Oncorhynchusmykiss]	2;2;2	2;2;2	2;2;2	;;	3	2	2	2	2	2	1	2	2	2	2	2	2	2	2	2	2	1	2	2
XP_021424232.1	gene25994:106565239	XM_014132132.1	XP_013987607.1	LOC106565239	FALSE	TRUE	thioredoxin reductase 1, cytoplasmic-like	601	4035	1	protein_coding	XP_021424232.1	gi|929222658|ref|XP_013987607.1|	97.84	601	13	0	1	601	1	601	0	1223	XP_021424232.1thioredoxinreductase1,cytoplasmic-like[Oncorhynchusmykiss]	XP_021424232.1thioredoxinreductase1,cytoplasmic-like[Oncorhynchusmykiss]	23	23	17		1	23	23	17	22	21	21	21	20	22	19	21	18	19	21	22	21	21	21	20
XP_021424234.1	gene21813:106560930	XM_014124396.1	XP_013979871.1	LOC106560930	FALSE	FALSE	phosphatidylcholine-sterol acyltransferase-like	456	1730	1	protein_coding	XP_021424234.1	gi|929124428|ref|XP_013979871.1|	96.93	456	13	1	1	455	1	456	0	926	XP_021424234.1phosphatidylcholine-sterolacyltransferase-like[Oncorhynchusmykiss]	XP_021424234.1phosphatidylcholine-sterolacyltransferase-like[Oncorhynchusmykiss]	3	3	3		1	3	3	3	3	3	3	3	2	3	3	3	3	2	3	3	3	3	3	2
XP_021424257.1	gene26007:106565228	XM_014132107.1	XP_013987582.1	LOC106565228	FALSE	FALSE	intermediate filament protein ON3-like	616	2326	1	protein_coding	XP_021424257.1	gi|929222614|ref|XP_013987582.1|	91.94	509	30	3	92	599	118	616	0	903	XP_021424257.1keratin,typeIIcytoskeletal8-like[Oncorhynchusmykiss];XP_021466270.1keratin,typeIIcytoskeletal8-like[Oncorhynchusmykiss]	XP_021424257.1keratin,typeIIcytoskeletal8-like[Oncorhynchusmykiss];XP_021466270.1keratin,typeIIcytoskeletal8-like[Oncorhynchusmykiss]	6;4	1;1	1;1	;	2	6	1	1	3	2	1	4	1	6	1	2	3	1	4	1	0	0	0	0
XP_021424267.1	gene21814:100194817	NM_001139846.1	NP_001133318.1	lypa3	FALSE	FALSE	1-O-acylceramide synthase	420	2029	1	protein_coding	XP_021424267.1	gi|213514980|ref|NP_001133318.1|	95.48	420	19	0	1	420	1	420	0	814	XP_021424267.1groupXVphospholipaseA2-like[Oncorhynchusmykiss];XP_021448501.1groupXVphospholipaseA2-like[Oncorhynchusmykiss]	XP_021424267.1groupXVphospholipaseA2-like[Oncorhynchusmykiss];XP_021448501.1groupXVphospholipaseA2-like[Oncorhynchusmykiss]	2;1	2;1	2;1	;	2	2	2	2	1	1	1	1	2	1	1	1	2	1	1	1	1	1	1	2
XP_021424313.1	gene26038:106565198	XM_014132057.1	XP_013987532.1	LOC106565198	FALSE	FALSE	WD repeat-containing protein 1-like	606	3073	1	protein_coding	XP_021424313.1	gi|929222519|ref|XP_013987532.1|	99.67	606	2	0	1	606	1	606	0	1248	XP_021424313.1WDrepeat-containingprotein1-like[Oncorhynchusmykiss]	XP_021424313.1WDrepeat-containingprotein1-like[Oncorhynchusmykiss]	17	17	9		1	17	17	9	15	14	14	16	16	14	14	15	16	15	16	15	14	14	16	16
XP_021424314.1	gene26039:106565197	XM_014132055.1	XP_013987530.1	LOC106565197	FALSE	FALSE	isocitrate dehydrogenase [NAD] subunit beta, mitochondrial-like	389	3247	1	protein_coding	XP_021424314.1	gi|929222515|ref|XP_013987530.1|	98.45	388	6	0	1	388	1	388	0	796	XP_021424314.1isocitratedehydrogenase[NAD]subunitbeta,mitochondrialisoformX1[Oncorhynchusmykiss];XP_021424315.1isocitratedehydrogenase[NAD]subunitbeta,mitochondrialisoformX2[Oncorhynchusmykiss]	XP_021424314.1isocitratedehydrogenase[NAD]subunitbeta,mitochondrialisoformX1[Oncorhynchusmykiss];XP_021424315.1isocitratedehydrogenase[NAD]subunitbeta,mitochondrialisoformX2[Oncorhynchusmykiss]	3;2	3;2	3;2	;	2	3	3	3	0	1	3	3	3	2	1	1	2	0	1	0	1	3	3	3
XP_021424326.1	gene26048:106565191	XM_014132043.1	XP_013987518.1	LOC106565191	FALSE	FALSE	glutaredoxin-1-like	106	1030	1	protein_coding	XP_021424326.1	gi|929222494|ref|XP_013987518.1|	100	106	0	0	1	106	1	106	7e-57	217	XP_021424326.1glutaredoxin-1-like[Oncorhynchusmykiss]	XP_021424326.1glutaredoxin-1-like[Oncorhynchusmykiss]	4	4	4		1	4	4	4	3	3	3	3	3	3	3	3	4	3	3	3	3	3	3	3
XP_021424341.1	gene26056:100195527	NM_001140556.1	NP_001134028.1	nop56	FALSE	FALSE	NOP56 ribonucleoprotein	541	2541	1	protein_coding	XP_021424341.1	gi|213515570|ref|NP_001134028.1|	97.24	544	12	2	1	544	1	541	0	958	XP_021424341.1nucleolarprotein56[Oncorhynchusmykiss]	XP_021424341.1nucleolarprotein56[Oncorhynchusmykiss]	10	10	10		1	10	10	10	10	10	10	10	9	10	8	8	9	9	10	10	10	10	10	9
XP_021424356.1	gene26065:100194932	XM_014131722.1	XP_013987197.1	acy1	FALSE	FALSE	aminoacylase 1	453	2012	1	protein_coding	XP_021424356.1	gi|929221906|ref|XP_013987197.1|	97.37	418	11	0	1	418	35	452	0	842	XP_021424356.1aminoacylase-1[Oncorhynchusmykiss];XP_021424354.1aminoacylase-1[Oncorhynchusmykiss]	XP_021424356.1aminoacylase-1[Oncorhynchusmykiss];XP_021424354.1aminoacylase-1[Oncorhynchusmykiss]	15;15	15;15	15;15	;	2	15	15	15	15	12	14	14	13	14	13	12	13	15	14	15	12	14	14	13
XP_021424380.1	gene26081:106565161	XM_014131973.1	XP_013987448.1	LOC106565161	FALSE	FALSE	inter-alpha-trypsin inhibitor heavy chain H3-like	908	2932	1	protein_coding	XP_021424380.1	gi|929222366|ref|XP_013987448.1|	90.01	911	88	1	1	911	1	908	0	1632	XP_021424380.1inter-alpha-trypsininhibitorheavychainH3-likeisoformX1[Oncorhynchusmykiss];XP_021424381.1inter-alpha-trypsininhibitorheavychainH3-likeisoformX2[Oncorhynchusmykiss];XP_021424382.1inter-alpha-trypsininhibitorheavychainH3-likeisoformX3[Oncorhynchusmykiss];CON__Q0V8M9	XP_021424380.1inter-alpha-trypsininhibitorheavychainH3-likeisoformX1[Oncorhynchusmykiss];XP_021424381.1inter-alpha-trypsininhibitorheavychainH3-likeisoformX2[Oncorhynchusmykiss];XP_021424382.1inter-alpha-trypsininhibitorheavychainH3-likeisoformX3[Oncorhynchusmykiss]	11;10;9;1	11;10;9;1	7;6;5;0	;;	4	11	11	7	11	9	9	10	10	8	11	10	10	10	10	11	9	9	10	10
XP_021424469.1	gene26194:106565337	XM_014132330.1	XP_013987805.1	LOC106565337	FALSE	FALSE	double-stranded RNA-binding protein Staufen homolog 1-like	707	4715	1	protein_coding	XP_021424469.1	gi|929223025|ref|XP_013987805.1|	98.02	707	14	0	1	707	1	707	0	1434	XP_021424469.1double-strandedRNA-bindingproteinStaufenhomolog1-like[Oncorhynchusmykiss]	XP_021424469.1double-strandedRNA-bindingproteinStaufenhomolog1-like[Oncorhynchusmykiss]	4	4	1		1	4	4	1	3	4	4	4	3	3	4	4	3	4	3	3	4	4	4	3
XP_021424527.1	gene26225:106565356	XM_014132368.1	XP_013987843.1	LOC106565356	FALSE	FALSE	ubiquinol-cytochrome-c reductase complex assembly factor 2	131	534	1	protein_coding	XP_021424527.1	gi|929223099|ref|XP_013987843.1|	100	131	0	0	1	131	1	131	1e-72	270	XP_021424527.1ubiquinol-cytochrome-creductasecomplexassemblyfactor2[Oncorhynchusmykiss];XP_021465952.1ubiquinol-cytochrome-creductasecomplexassemblyfactor2-like[Oncorhynchusmykiss]	XP_021424527.1ubiquinol-cytochrome-creductasecomplexassemblyfactor2[Oncorhynchusmykiss];XP_021465952.1ubiquinol-cytochrome-creductasecomplexassemblyfactor2-like[Oncorhynchusmykiss]	2;1	2;1	2;1	;	2	2	2	2	1	1	2	1	1	1	1	1	1	1	1	1	1	2	1	1
XP_021424573.1	gene26230:106565361	XM_014132379.1	XP_013987854.1	LOC106565361	FALSE	FALSE	enolase-like	433	1797	1	protein_coding	XP_021424573.1	gi|929223119|ref|XP_013987854.1|	100	433	0	0	1	433	1	433	0	893	XP_021424573.1enolase-like[Oncorhynchusmykiss]	XP_021424573.1enolase-like[Oncorhynchusmykiss]	14	5	5		1	14	5	5	14	14	12	13	14	14	14	14	14	14	14	5	5	3	4	5
XP_021424576.1	gene26255:106565377	XM_014132421.1	XP_013987896.1	LOC106565377	FALSE	FALSE	60S acidic ribosomal protein P0	315	1237	1	protein_coding	XP_021424576.1	gi|929223196|ref|XP_013987896.1|	99.68	315	1	0	1	315	1	315	0	643	XP_021424576.160SacidicribosomalproteinP0-like[Oncorhynchusmykiss]	XP_021424576.160SacidicribosomalproteinP0-like[Oncorhynchusmykiss]	10	10	2		1	10	10	2	10	10	10	10	10	10	10	10	10	10	10	10	10	10	10	10
XP_021424635.1	gene26290:100306749	NM_001165288.1	NP_001158760.1	inpp	FALSE	FALSE	Inositol polyphosphate 1-phosphatase	389	1442	1	protein_coding	XP_021424635.1	gi|259155397|ref|NP_001158760.1|	97.94	389	8	0	1	389	1	389	0	786	XP_021424635.1inositolpolyphosphate1-phosphatase-like[Oncorhynchusmykiss];XP_021465853.1inositolpolyphosphate1-phosphatase-like[Oncorhynchusmykiss];XP_021465852.1inositolpolyphosphate1-phosphatase-like[Oncorhynchusmykiss]	XP_021424635.1inositolpolyphosphate1-phosphatase-like[Oncorhynchusmykiss];XP_021465853.1inositolpolyphosphate1-phosphatase-like[Oncorhynchusmykiss];XP_021465852.1inositolpolyphosphate1-phosphatase-like[Oncorhynchusmykiss]	4;2;2	4;2;2	4;2;2	;;	3	4	4	4	3	4	4	4	4	3	4	3	4	4	4	3	4	4	4	4
XP_021424676.1	gene26307:100195514	NM_001140543.1	NP_001134015.1	rnpep	FALSE	FALSE	arginyl aminopeptidase (aminopeptidase B)	626	2304	1	protein_coding	XP_021424676.1	gi|213513219|ref|NP_001134015.1|	98.24	626	11	0	1	626	1	626	0	1289	XP_021424676.1aminopeptidaseBisoformX1[Oncorhynchusmykiss];XP_021424678.1aminopeptidaseBisoformX3[Oncorhynchusmykiss];XP_021424677.1aminopeptidaseBisoformX2[Oncorhynchusmykiss];XP_021442930.1aminopeptidaseRNPEPL1isoformX2[Oncorhynchusmykiss];XP_021442929.1aminopeptidaseRNPEPL1isoformX1[Oncorhynchusmykiss]	XP_021424676.1aminopeptidaseBisoformX1[Oncorhynchusmykiss];XP_021424678.1aminopeptidaseBisoformX3[Oncorhynchusmykiss];XP_021424677.1aminopeptidaseBisoformX2[Oncorhynchusmykiss]	8;6;6;1;1	8;6;6;1;1	8;6;6;1;1	;;	5	8	8	8	7	8	7	8	6	8	7	7	7	7	8	7	8	7	8	6
XP_021424705.1	gene21836:106560909	XM_014124335.1	XP_013979810.1	LOC106560909	FALSE	FALSE	anamorsin-B	361	2594	1	protein_coding	XP_021424705.1	gi|929124314|ref|XP_013979811.1|	97.44	313	8	0	1	313	1	313	2e-154	543	XP_021424705.1anamorsin-B[Oncorhynchusmykiss]	XP_021424705.1anamorsin-B[Oncorhynchusmykiss]	4	4	3		1	4	4	3	3	3	3	3	4	4	3	2	4	4	3	3	3	3	3	4
XP_021424802.1	gene26348:106565459	XM_014132663.1	XP_013988138.1	LOC106565459	FALSE	FALSE	heterogeneous nuclear ribonucleoprotein A1-like	369	1969	1	protein_coding	XP_021424802.1	gi|929223637|ref|XP_013988139.1|	100	188	0	0	1	188	1	188	9e-113	405	XP_021424802.1heterogeneousnuclearribonucleoproteinA1-likeisoformX2[Oncorhynchusmykiss];XP_021424801.1heterogeneousnuclearribonucleoproteinA1-likeisoformX2[Oncorhynchusmykiss];XP_021424805.1heterogeneousnuclearribonucleoproteinA1-likeisoformX3[Oncorhynchusmykiss];XP_021424804.1heterogeneousnuclearribonucleoproteinA1-likeisoformX3[Oncorhynchusmykiss];XP_021424800.1heterogeneousnuclearribonucleopro…	XP_021424802.1heterogeneousnuclearribonucleoproteinA1-likeisoformX2[Oncorhynchusmykiss];XP_021424801.1heterogeneousnuclearribonucleoproteinA1-likeisoformX2[Oncorhynchusmykiss];XP_021424805.1heterogeneousnuclearribonucleoproteinA1-likeisoformX3[Oncorhynchusmykiss];XP_021424804.1heterogeneousnuclearribonucleoproteinA1-likeisoformX3[Oncorhynchusmykiss];XP_021424800.1heterogeneousnuclearribonucleopro…	7;7;6;6;6;6	2;2;1;1;1;1	2;2;1;1;1;1	;;;;;	6	7	2	2	7	7	4	7	5	6	7	6	6	6	7	2	2	1	2	1
XP_021424823.1	gene26371:106565469	XM_014132685.1	XP_013988160.1	LOC106565469	FALSE	FALSE	extended synaptotagmin-1-like	1856	7634	1	protein_coding	XP_021424823.1	gi|929223676|ref|XP_013988160.1|	97.41	1856	48	0	1	1856	1	1856	0	3642	XP_021424823.1extendedsynaptotagmin-1-like[Oncorhynchusmykiss]	XP_021424823.1extendedsynaptotagmin-1-like[Oncorhynchusmykiss]	9	9	6		1	9	9	6	7	6	8	6	6	8	6	5	8	6	7	7	6	8	6	6
XP_021424854.1	gene26383:106565596	XM_014132899.1	XP_013988374.1	LOC106565596	FALSE	FALSE	methyltransferase-like protein 7A	242	944	1	protein_coding	XP_021424854.1	gi|929224072|ref|XP_013988374.1|	97.52	242	6	0	1	242	1	242	1e-125	447	XP_021424854.1methyltransferase-likeprotein7AisoformX3[Oncorhynchusmykiss];XP_021424853.1uncharacterizedproteinLOC110494251isoformX2[Oncorhynchusmykiss];XP_021424852.1uncharacterizedproteinLOC110494251isoformX1[Oncorhynchusmykiss]	XP_021424854.1methyltransferase-likeprotein7AisoformX3[Oncorhynchusmykiss];XP_021424853.1uncharacterizedproteinLOC110494251isoformX2[Oncorhynchusmykiss];XP_021424852.1uncharacterizedproteinLOC110494251isoformX1[Oncorhynchusmykiss]	5;4;4	5;4;4	5;4;4	;;	3	5	5	5	4	4	3	4	5	4	3	4	4	3	5	4	4	3	4	5
XP_021424864.1	gene26389:106565588	XM_014132874.1	XP_013988349.1	LOC106565588	FALSE	FALSE	exportin-2	971	3820	1	protein_coding	XP_021424864.1	gi|929224022|ref|XP_013988348.1|	99.28	971	7	0	1	971	1	971	0	1992	XP_021424864.1exportin-2[Oncorhynchusmykiss]	XP_021424864.1exportin-2[Oncorhynchusmykiss]	16	4	4		1	16	4	4	14	15	16	13	11	15	13	14	16	14	15	4	4	4	4	3
XP_021424947.1	gene26449:106565538	XM_014132784.1	XP_013988259.1	LOC106565538	FALSE	FALSE	proliferation-associated protein 2G4-like	393	2268	1	protein_coding	XP_021424947.1	gi|929223853|ref|XP_013988259.1|	97.46	393	10	0	1	393	1	393	0	771	XP_021424947.1proliferation-associatedprotein2G4-like[Oncorhynchusmykiss]	XP_021424947.1proliferation-associatedprotein2G4-like[Oncorhynchusmykiss]	8	3	0		1	8	3	0	7	8	8	7	8	8	8	8	8	8	8	3	3	3	3	3
XP_021424948.1	gene26451:106565535	XM_014132778.1	XP_013988253.1	LOC106565535	FALSE	FALSE	peptidyl-prolyl cis-trans isomerase FKBP11-like	193	889	1	protein_coding	XP_021424948.1	gi|929223843|ref|XP_013988253.1|	98.96	193	2	0	1	193	1	193	1e-107	387	XP_021424948.1peptidyl-prolylcis-transisomeraseFKBP11-like[Oncorhynchusmykiss];XP_021465623.1peptidyl-prolylcis-transisomeraseFKBP11-like[Oncorhynchusmykiss]	XP_021424948.1peptidyl-prolylcis-transisomeraseFKBP11-like[Oncorhynchusmykiss]	8;2	8;2	8;2		2	8	8	8	6	7	7	8	7	6	6	7	6	6	7	6	7	7	8	7
XP_021424963.1	gene26473:106565519	XM_014132749.1	XP_013988224.1	LOC106565519	FALSE	FALSE	elongation factor Ts, mitochondrial	309	1277	1	protein_coding	XP_021424963.1	gi|929223790|ref|XP_013988224.1|	98.06	309	6	0	1	309	1	309	4e-180	629	XP_021424963.1elongationfactorTs,mitochondrial[Oncorhynchusmykiss]	XP_021424963.1elongationfactorTs,mitochondrial[Oncorhynchusmykiss]	3	3	3		1	3	3	3	3	2	2	2	2	2	2	2	1	2	2	3	2	2	2	2
XP_021424981.1	gene26492:106565674	XM_014133038.1	XP_013988513.1	LOC106565674	FALSE	FALSE	interferon regulatory factor 6-like	516	2982	1	protein_coding	XP_021424981.1	gi|929224329|ref|XP_013988513.1|	98.77	486	6	0	1	486	31	516	0	988	XP_021424981.1interferonregulatoryfactor6-likeisoformX2[Oncorhynchusmykiss];XP_021424980.1interferonregulatoryfactor6-likeisoformX1[Oncorhynchusmykiss]	XP_021424981.1interferonregulatoryfactor6-likeisoformX2[Oncorhynchusmykiss];XP_021424980.1interferonregulatoryfactor6-likeisoformX1[Oncorhynchusmykiss]	4;4	1;1	1;1	;	2	4	1	1	3	4	4	3	1	2	2	2	3	2	3	1	1	1	1	0
XP_021424988.1	gene26495:106565671	XM_014133023.1	XP_013988498.1	LOC106565671	FALSE	FALSE	AMP deaminase 2-like	951	7748	1	protein_coding	XP_021424988.1	gi|929224304|ref|XP_013988498.1|	98.44	832	13	0	1	832	120	951	0	1711	XP_021424988.1AMPdeaminase2-like[Oncorhynchusmykiss];XP_021465581.1AMPdeaminase2-likeisoformX3[Oncorhynchusmykiss];XP_021465580.1AMPdeaminase2-likeisoformX3[Oncorhynchusmykiss];XP_021465578.1AMPdeaminase2-likeisoformX1[Oncorhynchusmykiss];XP_021465579.1AMPdeaminase2-likeisoformX2[Oncorhynchusmykiss];XP_021472630.1AMPdeaminase2-like[Oncorhynchusmykiss]	XP_021424988.1AMPdeaminase2-like[Oncorhynchusmykiss];XP_021465581.1AMPdeaminase2-likeisoformX3[Oncorhynchusmykiss];XP_021465580.1AMPdeaminase2-likeisoformX3[Oncorhynchusmykiss];XP_021465578.1AMPdeaminase2-likeisoformX1[Oncorhynchusmykiss];XP_021465579.1AMPdeaminase2-likeisoformX2[Oncorhynchusmykiss]	11;7;7;7;6;2	11;7;7;7;6;2	9;6;6;6;5;0	;;;;	6	11	11	9	9	10	9	9	9	11	9	10	9	8	8	9	10	9	9	9
XP_021425014.1	gene26514:100195291	NM_001140320.1	NP_001133792.1	bysl	FALSE	FALSE	bystin-like	439	2056	1	protein_coding	XP_021425014.1	gi|213514468|ref|NP_001133792.1|	99.05	423	2	1	19	441	19	439	0	835	XP_021425014.1bystin[Oncorhynchusmykiss];XP_021425013.1bystin[Oncorhynchusmykiss]	XP_021425014.1bystin[Oncorhynchusmykiss];XP_021425013.1bystin[Oncorhynchusmykiss]	3;3	3;3	3;3	;	2	3	3	3	2	2	1	3	2	2	1	1	1	1	1	2	2	1	3	2
XP_021425037.1	gene26527:100380396	XM_014132917.1	XP_013988392.1	atad3	FALSE	FALSE	ATPase family AAA domain-containing protein 3	701	2607	1	protein_coding	XP_021425037.1	gi|929224102|ref|XP_013988392.1|	98.72	701	9	0	1	701	1	701	0	1414	XP_021425037.1ATPasefamilyAAAdomain-containingprotein3-like[Oncorhynchusmykiss];XP_021471882.1ATPasefamilyAAAdomain-containingprotein3-like[Oncorhynchusmykiss]	XP_021425037.1ATPasefamilyAAAdomain-containingprotein3-like[Oncorhynchusmykiss];XP_021471882.1ATPasefamilyAAAdomain-containingprotein3-like[Oncorhynchusmykiss]	3;2	3;2	3;2	;	2	3	3	3	3	2	2	3	2	3	2	3	3	3	3	3	2	2	3	2
XP_021425117.1	gene26576:100286560	XM_014133088.1	XP_013988563.1	park7	FALSE	FALSE	parkinson disease (autosomal recessive, early onset) 7	189	981	1	protein_coding	XP_021425117.1	gi|929224430|ref|XP_013988563.1|	99.47	189	1	0	1	189	1	189	3e-104	376	XP_021425117.1proteinDJ-1zDJ-1-like[Oncorhynchusmykiss]	XP_021425117.1proteinDJ-1zDJ-1-like[Oncorhynchusmykiss]	4	4	4		1	4	4	4	4	4	4	3	3	4	4	3	1	2	4	4	4	4	3	3
XP_021425119.1	gene26579:100194670	NM_001139750.1	NP_001133222.1	LOC100194670	FALSE	FALSE	aldo-keto reductase family 7 member A5-like	360	1407	1	protein_coding	XP_021425119.1	gi|213514514|ref|NP_001133222.1|	97.22	360	10	0	1	360	1	360	0	739	XP_021425119.1aflatoxinB1aldehydereductasemember4-like[Oncorhynchusmykiss]	XP_021425119.1aflatoxinB1aldehydereductasemember4-like[Oncorhynchusmykiss]	9	9	9		1	9	9	9	9	8	9	9	9	8	7	7	8	9	9	9	8	9	9	9
XP_021425126.1	gene26582:106565909	XM_014133595.1	XP_013989070.1	LOC106565909	FALSE	FALSE	delta-1-pyrroline-5-carboxylate dehydrogenase, mitochondrial	556	1941	1	protein_coding	XP_021425126.1	gi|929225394|ref|XP_013989070.1|	99.64	556	2	0	1	556	1	556	0	1152	XP_021425126.1delta-1-pyrroline-5-carboxylatedehydrogenase,mitochondrial[Oncorhynchusmykiss]	XP_021425126.1delta-1-pyrroline-5-carboxylatedehydrogenase,mitochondrial[Oncorhynchusmykiss]	16	16	5		1	16	16	5	16	16	16	16	15	16	16	16	15	16	16	16	16	16	16	15
XP_021425142.1	gene26594:106565904	XM_014133578.1	XP_013989053.1	LOC106565904	FALSE	FALSE	60S ribosomal protein L22	132	521	1	protein_coding	XP_021425142.1	gi|929225364|ref|XP_013989053.1|	98.48	132	2	0	1	132	1	132	3e-72	268	XP_021425142.160SribosomalproteinL22[Oncorhynchusmykiss]	XP_021425142.160SribosomalproteinL22[Oncorhynchusmykiss]	4	4	1		1	4	4	1	4	4	4	4	4	4	4	4	4	4	4	4	4	4	4	4
XP_021425166.1	gene21861:100380756	XM_014124278.1	XP_013979753.1	LOC100380756	FALSE	FALSE	carboxylesterase 5A	569	1851	1	protein_coding	XP_021425166.1	gi|929124206|ref|XP_013979754.1|	98.56	555	8	0	1	555	14	568	0	1142	XP_021425166.1carboxylesterase5A-likeisoformX2[Oncorhynchusmykiss];XP_021425157.1carboxylesterase5A-likeisoformX1[Oncorhynchusmykiss]	XP_021425166.1carboxylesterase5A-likeisoformX2[Oncorhynchusmykiss];XP_021425157.1carboxylesterase5A-likeisoformX1[Oncorhynchusmykiss]	8;8	8;8	8;8	;	2	8	8	8	8	6	6	6	6	8	5	7	6	6	5	8	6	6	6	6
XP_021425191.1	gene26611:106565886	XM_014133524.1	XP_013988999.1	LOC106565886	FALSE	FALSE	heterochromatin protein 1-binding protein 3-like	606	2809	1	protein_coding	XP_021425191.1	gi|929225258|ref|XP_013988998.1|	98.18	606	10	1	1	605	1	606	0	894	XP_021425191.1heterochromatinprotein1-bindingprotein3-like[Oncorhynchusmykiss];XP_021425190.1heterochromatinprotein1-bindingprotein3-like[Oncorhynchusmykiss];XP_021465391.1heterochromatinprotein1-bindingprotein3-likeisoformX5[Oncorhynchusmykiss];XP_021465390.1heterochromatinprotein1-bindingprotein3-likeisoformX4[Oncorhynchusmykiss];XP_021465389.1heterochromatinprotein1-bindingprotein3-likeisoform…	XP_021425191.1heterochromatinprotein1-bindingprotein3-like[Oncorhynchusmykiss];XP_021425190.1heterochromatinprotein1-bindingprotein3-like[Oncorhynchusmykiss];XP_021465391.1heterochromatinprotein1-bindingprotein3-likeisoformX5[Oncorhynchusmykiss];XP_021465390.1heterochromatinprotein1-bindingprotein3-likeisoformX4[Oncorhynchusmykiss];XP_021465389.1heterochromatinprotein1-bindingprotein3-likeisoform…	5;5;4;4;4;4;4;4	5;5;4;4;4;4;4;4	5;5;4;4;4;4;4;4	;;;;;;;	8	5	5	5	4	5	5	5	5	5	5	5	5	5	5	4	5	5	5	5
XP_021425237.1	gene26627:100380857	XM_014133498.1	XP_013988973.1	LOC100380857	FALSE	FALSE	protein-arginine deiminase type-2	691	3234	1	protein_coding	XP_021425237.1	gi|929225209|ref|XP_013988974.1|	97.47	672	17	0	1	672	1	672	0	1328	XP_021425237.1protein-argininedeiminasetype-2-likeisoformX1[Oncorhynchusmykiss];XP_021425238.1protein-argininedeiminasetype-2-likeisoformX2[Oncorhynchusmykiss];XP_021425235.1protein-argininedeiminasetype-2-likeisoformX1[Oncorhynchusmykiss];XP_021425239.1protein-argininedeiminasetype-2-likeisoformX3[Oncorhynchusmykiss];XP_021425236.1protein-argininedeiminasetype-2-likeisoformX2[Oncorhynchusmykiss]	XP_021425237.1protein-argininedeiminasetype-2-likeisoformX1[Oncorhynchusmykiss];XP_021425238.1protein-argininedeiminasetype-2-likeisoformX2[Oncorhynchusmykiss];XP_021425235.1protein-argininedeiminasetype-2-likeisoformX1[Oncorhynchusmykiss];XP_021425239.1protein-argininedeiminasetype-2-likeisoformX3[Oncorhynchusmykiss];XP_021425236.1protein-argininedeiminasetype-2-likeisoformX2[Oncorhynchusmykiss]	12;11;9;8;8	12;11;9;8;8	12;11;9;8;8	;;;;	5	12	12	12	12	12	10	9	9	10	11	9	9	12	10	12	12	10	9	9
XP_021425259.1	gene26635:106565861	XM_014133465.1	XP_013988940.1	LOC106565861	FALSE	FALSE	guanine nucleotide-binding protein-like 3	558	2184	1	protein_coding	XP_021425259.1	gi|929225145|ref|XP_013988940.1|	97.14	560	14	1	1	560	1	558	0	1019	XP_021425259.1guaninenucleotide-bindingprotein-like3[Oncorhynchusmykiss];XP_021465317.1guaninenucleotide-bindingprotein-like3isoformX2[Oncorhynchusmykiss];XP_021465316.1guaninenucleotide-bindingprotein-like3isoformX1[Oncorhynchusmykiss]	XP_021425259.1guaninenucleotide-bindingprotein-like3[Oncorhynchusmykiss];XP_021465317.1guaninenucleotide-bindingprotein-like3isoformX2[Oncorhynchusmykiss];XP_021465316.1guaninenucleotide-bindingprotein-like3isoformX1[Oncorhynchusmykiss]	3;2;2	3;2;2	3;2;2	;;	3	3	3	3	1	1	2	2	3	2	2	2	1	2	2	1	1	2	2	3
XP_021425263.1	gene26638:100306723	NM_001165262.1	NP_001158734.1	spcs1	FALSE	FALSE	signal peptidase complex subunit 1 homolog (S. cerevisiae)	102	469	1	protein_coding	XP_021425263.1	gi|259155345|ref|NP_001158734.1|	98.04	102	2	0	1	102	1	102	8e-54	207	XP_021425263.1signalpeptidasecomplexsubunit1-like[Oncorhynchusmykiss]	XP_021425263.1signalpeptidasecomplexsubunit1-like[Oncorhynchusmykiss]	3	3	3		1	3	3	3	3	3	3	3	2	3	2	3	2	3	3	3	3	3	3	2
XP_021425265.1	gene26640:106565858	XM_014133458.1	XP_013988933.1	LOC106565858	FALSE	FALSE	calcium/calmodulin-dependent protein kinase type 1-like	400	2703	1	protein_coding	XP_021425265.1	gi|929225130|ref|XP_013988933.1|	98.45	388	5	1	1	388	14	400	0	766	XP_021425265.1calcium/calmodulin-dependentproteinkinasetype1-likeisoformX2[Oncorhynchusmykiss];XP_021425264.1calcium/calmodulin-dependentproteinkinasetype1-likeisoformX1[Oncorhynchusmykiss];XP_021463908.1calcium/calmodulin-dependentproteinkinaseIisoformX1[Oncorhynchusmykiss]	XP_021425265.1calcium/calmodulin-dependentproteinkinasetype1-likeisoformX2[Oncorhynchusmykiss];XP_021425264.1calcium/calmodulin-dependentproteinkinasetype1-likeisoformX1[Oncorhynchusmykiss];XP_021463908.1calcium/calmodulin-dependentproteinkinaseIisoformX1[Oncorhynchusmykiss]	7;7;4	7;7;4	7;7;4	;;	3	7	7	7	6	7	7	7	7	5	7	7	7	7	7	6	7	7	7	7
XP_021425288.1	gene26656:106565847	XM_014133435.1	XP_013988910.1	LOC106565847	FALSE	FALSE	26S proteasome non-ATPase regulatory subunit 6-like	389	1471	1	protein_coding	XP_021425288.1	gi|929225085|ref|XP_013988910.1|	99.49	389	2	0	1	389	1	389	0	800	XP_021425288.126Sproteasomenon-ATPaseregulatorysubunit6-like[Oncorhynchusmykiss];XP_021463919.126Sproteasomenon-ATPaseregulatorysubunit6isoformX1[Oncorhynchusmykiss]	XP_021425288.126Sproteasomenon-ATPaseregulatorysubunit6-like[Oncorhynchusmykiss];XP_021463919.126Sproteasomenon-ATPaseregulatorysubunit6isoformX1[Oncorhynchusmykiss]	13;11	13;11	13;11	;	2	13	13	13	13	10	11	12	11	11	10	9	8	11	10	13	10	11	12	11
XP_021425314.1	gene26673:106565827	XM_014133394.1	XP_013988869.1	LOC106565827	FALSE	FALSE	protein kinase C delta type-like	686	3405	1	protein_coding	XP_021425314.1	gi|929225004|ref|XP_013988869.1|	98.1	686	13	0	1	686	1	686	0	1415	XP_021425314.1proteinkinaseCdeltatype-like[Oncorhynchusmykiss];XP_021465278.1proteinkinaseCdeltatype-likeisoformX2[Oncorhynchusmykiss];XP_021465277.1proteinkinaseCdeltatype-likeisoformX1[Oncorhynchusmykiss];XP_021465276.1proteinkinaseCdeltatype-likeisoformX1[Oncorhynchusmykiss]	XP_021425314.1proteinkinaseCdeltatype-like[Oncorhynchusmykiss]	5;2;2;2	5;2;2;2	5;2;2;2		4	5	5	5	5	5	5	5	5	5	5	5	5	5	5	5	5	5	5	5
XP_021425320.1	gene26677:106565822	XM_014133388.1	XP_013988863.1	LOC106565822	FALSE	FALSE	inter-alpha-trypsin inhibitor heavy chain H3-like	909	3101	1	protein_coding	XP_021425320.1	gi|929224993|ref|XP_013988863.1|	95.6	909	40	0	1	909	1	909	0	1775	XP_021425320.1inter-alpha-trypsininhibitorheavychainH3-like[Oncorhynchusmykiss]	XP_021425320.1inter-alpha-trypsininhibitorheavychainH3-like[Oncorhynchusmykiss]	7	7	4		1	7	7	4	7	6	6	5	7	6	7	6	6	6	7	7	6	6	5	7
XP_021425322.1	gene26680:106565820	XM_014133383.1	XP_013988858.1	LOC106565820	FALSE	FALSE	dolichyl-diphosphooligosaccharide--protein glycosyltransferase subunit 1-like	602	3404	1	protein_coding	XP_021425322.1	gi|929224983|ref|XP_013988858.1|	98.34	602	10	0	1	602	1	602	0	1222	XP_021425322.1dolichyl-diphosphooligosaccharide--proteinglycosyltransferasesubunit1-like[Oncorhynchusmykiss]	XP_021425322.1dolichyl-diphosphooligosaccharide--proteinglycosyltransferasesubunit1-like[Oncorhynchusmykiss]	21	6	6		1	21	6	6	20	21	21	20	20	20	19	20	19	19	19	6	6	6	5	5
XP_021425328.1	gene26684:106565815	XM_014133378.1	XP_013988853.1	LOC106565815	FALSE	FALSE	actin-related protein 2/3 complex subunit 4-like	168	1223	1	protein_coding	XP_021425328.1	gi|929224974|ref|XP_013988853.1|	100	168	0	0	1	168	1	168	4e-94	342	XP_021425328.1actin-relatedprotein2/3complexsubunit4-likeisoformX1[Oncorhynchusmykiss];XP_021465258.1actin-relatedprotein2/3complexsubunit4-likeisoformX1[Oncorhynchusmykiss]	XP_021425328.1actin-relatedprotein2/3complexsubunit4-likeisoformX1[Oncorhynchusmykiss];XP_021465258.1actin-relatedprotein2/3complexsubunit4-likeisoformX1[Oncorhynchusmykiss]	4;4	1;1	1;1	;	2	4	1	1	4	4	4	4	4	4	4	4	4	4	4	1	1	1	1	1
XP_021425341.1	gene26697:106565806	XM_014133361.1	XP_013988836.1	LOC106565806	FALSE	FALSE	cytochrome b-c1 complex subunit 1, mitochondrial-like	474	2041	1	protein_coding	XP_021425341.1	gi|929224940|ref|XP_013988836.1|	97.07	478	10	1	1	478	1	474	0	965	XP_021425341.1cytochromeb-c1complexsubunit1,mitochondrial-like[Oncorhynchusmykiss]	XP_021425341.1cytochromeb-c1complexsubunit1,mitochondrial-like[Oncorhynchusmykiss]	8	8	5		1	8	8	5	8	8	8	7	7	7	8	8	7	8	8	8	8	8	7	7
XP_021425449.1	gene26754:106565753	XM_014133231.1	XP_013988706.1	LOC106565753	FALSE	FALSE	ADP-ribosylation factor-like protein 8B	200	2849	1	protein_coding	XP_021425449.1	gi|929224691|ref|XP_013988706.1|	100	183	0	0	1	183	18	200	4e-105	379	XP_021425449.1ADP-ribosylationfactor-likeprotein8B-A[Oncorhynchusmykiss];XP_021464982.1ADP-ribosylationfactor-likeprotein8B-A[Oncorhynchusmykiss];XP_021425639.1ADP-ribosylationfactor-likeprotein8B-A[Oncorhynchusmykiss]	XP_021425449.1ADP-ribosylationfactor-likeprotein8B-A[Oncorhynchusmykiss]	5;2;1	5;2;1	4;1;1		3	5	5	4	4	3	4	5	4	4	5	5	4	3	3	4	3	4	5	4
XP_021425476.1	gene26765:106565741	XM_014133190.1	XP_013988665.1	LOC106565741	FALSE	FALSE	uncharacterized LOC106565741	551	3632	1	protein_coding	XP_021425476.1	gi|929224615|ref|XP_013988665.1|	97.64	551	13	0	1	551	1	551	0	1118	XP_021425476.1uncharacterizedproteinLOC110494595[Oncorhynchusmykiss]	XP_021425476.1uncharacterizedproteinLOC110494595[Oncorhynchusmykiss]	6	6	6		1	6	6	6	6	6	6	5	6	6	6	6	6	6	6	6	6	6	5	6
XP_021425486.1	gene21888:100380314	NM_001173599.1	NP_001167070.1	lonp2	FALSE	FALSE	lon peptidase 2, peroxisomal	863	3548	1	protein_coding	XP_021425486.1	gi|291190900|ref|NP_001167070.1|	98.38	863	14	0	1	863	1	863	0	1722	XP_021425486.1lonproteasehomolog2,peroxisomalisoformX2[Oncorhynchusmykiss];XP_021425478.1lonproteasehomolog2,peroxisomalisoformX1[Oncorhynchusmykiss]	XP_021425486.1lonproteasehomolog2,peroxisomalisoformX2[Oncorhynchusmykiss];XP_021425478.1lonproteasehomolog2,peroxisomalisoformX1[Oncorhynchusmykiss]	4;4	4;4	4;4	;	2	4	4	4	3	2	2	2	1	1	3	3	3	3	3	3	2	2	2	1
XP_021425514.1	gene26789:106565722	XM_014133136.1	XP_013988611.1	LOC106565722	FALSE	FALSE	dolichyl-diphosphooligosaccharide--protein glycosyltransferase subunit 2-like	640	2654	1	protein_coding	XP_021425514.1	gi|929224515|ref|XP_013988611.1|	95.52	647	22	1	1	647	1	640	0	1211	XP_021425514.1dolichyl-diphosphooligosaccharide--proteinglycosyltransferasesubunit2-like[Oncorhynchusmykiss]	XP_021425514.1dolichyl-diphosphooligosaccharide--proteinglycosyltransferasesubunit2-like[Oncorhynchusmykiss]	15	9	9		1	15	9	9	14	14	15	14	15	14	15	12	13	13	14	8	9	9	8	9
XP_021425524.1	gene21891:106560859	XM_014124238.1	XP_013979713.1	sf3b3	FALSE	TRUE	splicing factor 3b, subunit 3, 130kDa	1280	4567	1	protein_coding	XP_021425524.1	gi|929124126|ref|XP_013979713.1|	99.92	1217	1	0	1	1217	64	1280	0	2524	XP_021425524.1splicingfactor3Bsubunit3[Oncorhynchusmykiss];XP_021425516.1splicingfactor3Bsubunit3[Oncorhynchusmykiss]	XP_021425524.1splicingfactor3Bsubunit3[Oncorhynchusmykiss];XP_021425516.1splicingfactor3Bsubunit3[Oncorhynchusmykiss]	13;13	13;13	13;13	;	2	13	13	13	12	11	9	11	10	12	11	10	11	11	12	12	11	9	11	10
XP_021425557.1	gene21893:100195049	NM_001140078.1	NP_001133550.1	aars	FALSE	FALSE	alanyl-tRNA synthetase	967	3694	1	protein_coding	XP_021425557.1	gi|213512300|ref|NP_001133550.1|	98.66	967	13	0	1	967	1	967	0	1974	XP_021425557.1alanine--tRNAligase,cytoplasmic[Oncorhynchusmykiss]	XP_021425557.1alanine--tRNAligase,cytoplasmic[Oncorhynchusmykiss]	23	23	23		1	23	23	23	19	18	19	19	15	21	17	16	16	18	18	19	18	19	19	15
XP_021425577.1	gene26823:106565974	XM_014133698.1	XP_013989173.1	glyctk	FALSE	FALSE	glycerate kinase	589	3845	1	protein_coding	XP_021425577.1	gi|929225593|ref|XP_013989174.1|	98.1	526	10	0	1	526	1	526	0	1029	XP_021425577.1glyceratekinase[Oncorhynchusmykiss];XP_021425576.1glyceratekinase[Oncorhynchusmykiss]	XP_021425577.1glyceratekinase[Oncorhynchusmykiss];XP_021425576.1glyceratekinase[Oncorhynchusmykiss]	13;13	13;13	13;13	;	2	13	13	13	10	11	12	12	11	12	10	12	10	12	12	10	11	12	12	11
XP_021425592.1	gene26837:106566001	XM_014133756.1	XP_013989231.1	LOC106566001	FALSE	FALSE	hepatocyte growth factor-like protein	730	4350	1	protein_coding	XP_021425592.1	gi|929225697|ref|XP_013989232.1|	99.16	712	6	0	1	712	1	712	0	1473	XP_021425592.1hepatocytegrowthfactor-likeprotein[Oncorhynchusmykiss];XP_021465005.1hepatocytegrowthfactor-likeprotein[Oncorhynchusmykiss]	XP_021425592.1hepatocytegrowthfactor-likeprotein[Oncorhynchusmykiss]	5;1	5;1	5;1		2	5	5	5	4	5	5	3	4	5	2	2	2	4	2	4	5	5	3	4
XP_021425646.1	gene26928:106566059	XM_014133872.1	XP_013989347.1	LOC106566059	FALSE	FALSE	glutathione peroxidase 1-like	190	1216	1	protein_coding	XP_021425646.1	gi|929225923|ref|XP_013989347.1|	98.58	141	2	0	1	141	50	190	6e-80	294	XP_021425646.1glutathioneperoxidase1[Oncorhynchusmykiss]	XP_021425646.1glutathioneperoxidase1[Oncorhynchusmykiss]	7	7	7		1	7	7	7	6	6	6	6	3	6	4	5	4	5	7	6	6	6	6	3
XP_021425654.1	gene26934:106566052	XM_014133860.1	XP_013989335.1	LOC106566052	FALSE	FALSE	ras-related protein Rap-1A-like	185	1637	1	protein_coding	XP_021425654.1	gi|929225901|ref|XP_013989335.1|	100	185	0	0	1	185	1	185	7e-106	381	XP_021425654.1ras-relatedproteinRap-1A-like[Oncorhynchusmykiss];XP_021425653.1ras-relatedproteinRap-1A-like[Oncorhynchusmykiss];XP_021425652.1ras-relatedproteinRap-1A-like[Oncorhynchusmykiss]	XP_021425654.1ras-relatedproteinRap-1A-like[Oncorhynchusmykiss];XP_021425653.1ras-relatedproteinRap-1A-like[Oncorhynchusmykiss];XP_021425652.1ras-relatedproteinRap-1A-like[Oncorhynchusmykiss]	5;5;5	1;1;1	1;1;1	;;	3	5	1	1	5	4	5	5	5	5	5	5	4	5	5	1	1	1	1	1
XP_021425663.1	gene26941:106566046	XM_014133853.1	XP_013989328.1	LOC106566046	FALSE	FALSE	F-actin-capping protein subunit alpha-1	286	1867	1	protein_coding	XP_021425663.1	gi|929225887|ref|XP_013989328.1|	99.65	286	1	0	1	286	1	286	7e-172	601	XP_021425663.1F-actin-cappingproteinsubunitalpha-1[Oncorhynchusmykiss];XP_021464947.1F-actin-cappingproteinsubunitalpha-1-like[Oncorhynchusmykiss]	XP_021425663.1F-actin-cappingproteinsubunitalpha-1[Oncorhynchusmykiss];XP_021464947.1F-actin-cappingproteinsubunitalpha-1-like[Oncorhynchusmykiss]	9;6	7;5	7;5	;	2	9	7	7	9	9	9	8	9	9	9	7	8	8	8	7	7	7	6	7
XP_021425680.1	gene26958:106566032	XM_014133838.1	XP_013989313.1	LOC106566032	FALSE	FALSE	60S acidic ribosomal protein P2-like	177	915	1	protein_coding	XP_021425680.1	gi|929225848|ref|XP_013989313.1|	100	113	0	0	1	113	65	177	2e-58	222	XP_021425680.160SacidicribosomalproteinP2-likeisoformX2[Oncorhynchusmykiss];XP_021425679.160SacidicribosomalproteinP2-likeisoformX1[Oncorhynchusmykiss]	XP_021425680.160SacidicribosomalproteinP2-likeisoformX2[Oncorhynchusmykiss];XP_021425679.160SacidicribosomalproteinP2-likeisoformX1[Oncorhynchusmykiss]	3;3	3;3	3;3	;	2	3	3	3	3	2	2	3	2	2	2	2	2	3	3	3	2	2	3	2
XP_021425732.1	gene27139:106566093	XM_014133936.1	XP_013989411.1	appl1	FALSE	FALSE	adaptor protein, phosphotyrosine interaction, PH domain and leucine zipper containing 1	723	3902	1	protein_coding	XP_021425732.1	gi|929226044|ref|XP_013989414.1|	97.61	711	17	0	1	711	1	711	0	1450	XP_021425732.1DCC-interactingprotein13-alpha[Oncorhynchusmykiss]	XP_021425732.1DCC-interactingprotein13-alpha[Oncorhynchusmykiss]	3	3	3		1	3	3	3	3	1	3	2	1	2	2	2	3	3	1	3	1	3	2	1
XP_021425736.1	gene27141:106566092	XM_014133934.1	XP_013989409.1	LOC106566092	FALSE	FALSE	uncharacterized LOC106566092	226	1392	1	protein_coding	XP_021425736.1	gi|929226032|ref|XP_013989408.1|	98.23	226	4	0	1	226	1	226	6e-128	455	XP_021425736.1uncharacterizedproteinLOC110494739[Oncorhynchusmykiss];XP_021425735.1uncharacterizedproteinLOC110494739[Oncorhynchusmykiss]	XP_021425736.1uncharacterizedproteinLOC110494739[Oncorhynchusmykiss];XP_021425735.1uncharacterizedproteinLOC110494739[Oncorhynchusmykiss]	4;4	4;4	4;4	;	2	4	4	4	3	4	4	4	3	4	4	4	3	4	4	3	4	4	4	3
XP_021425767.1	gene27163:106566105	XM_014133956.1	XP_013989431.1	LOC106566105	FALSE	TRUE	mitogen-activated protein kinase 14A-like	252	3793	1	protein_coding	XP_021425767.1	gi|929226069|ref|XP_013989431.1|	99.58	240	1	0	1	240	13	252	9e-142	501	XP_021425767.1mitogen-activatedproteinkinase14A-like,partial[Oncorhynchusmykiss]	XP_021425767.1mitogen-activatedproteinkinase14A-like,partial[Oncorhynchusmykiss]	2	1	1		1	2	1	1	1	0	1	2	1	2	0	1	2	1	2	0	0	0	1	1
XP_021425770.1	gene27166:106566108	XM_014133959.1	XP_013989434.1	LOC106566108	FALSE	FALSE	ATP-dependent RNA helicase DDX19A-like	504	4190	1	protein_coding	XP_021425770.1	gi|929226075|ref|XP_013989434.1|	96.64	506	15	1	1	506	1	504	0	974	XP_021425770.1ATP-dependentRNAhelicaseDDX19A-like[Oncorhynchusmykiss]	XP_021425770.1ATP-dependentRNAhelicaseDDX19A-like[Oncorhynchusmykiss]	2	2	2		1	2	2	2	2	2	2	2	1	2	1	1	2	1	1	2	2	2	2	1
XP_021425778.1	gene27180:106566120	XM_014133972.1	XP_013989447.1	shmt2	FALSE	FALSE	serine hydroxymethyltransferase 2 (mitochondrial)	521	2188	1	protein_coding	XP_021425778.1	gi|929226101|ref|XP_013989448.1|	98.61	503	7	0	1	503	1	503	0	1030	XP_021425778.1serinehydroxymethyltransferase,mitochondrial[Oncorhynchusmykiss]	XP_021425778.1serinehydroxymethyltransferase,mitochondrial[Oncorhynchusmykiss]	23	23	23		1	23	23	23	18	18	17	19	17	22	15	19	13	16	19	18	18	17	19	17
XP_021425783.1	gene27195:106566135	XM_014133987.1	XP_013989462.1	mars	FALSE	TRUE	methionyl-tRNA synthetase	1021	4177	1	protein_coding	XP_021425783.1	gi|929226130|ref|XP_013989462.1|	94.72	1022	40	3	1	1009	1	1021	0	1987	XP_021425783.1methionine--tRNAligase,cytoplasmic[Oncorhynchusmykiss]	XP_021425783.1methionine--tRNAligase,cytoplasmic[Oncorhynchusmykiss]	14	14	14		1	14	14	14	13	11	13	12	13	12	11	11	12	12	12	13	11	13	12	13
XP_021425787.1	gene27196:106566142	XM_014133992.1	XP_013989467.1	LOC106566142	FALSE	TRUE	dynactin subunit 2-like	406	2439	1	protein_coding	XP_021425787.1	gi|929226140|ref|XP_013989467.1|	96.55	406	12	2	1	404	1	406	0	766	XP_021425787.1dynactinsubunit2[Oncorhynchusmykiss]	XP_021425787.1dynactinsubunit2[Oncorhynchusmykiss]	8	8	4		1	8	8	4	7	8	7	7	8	7	8	8	7	7	6	7	8	7	7	8
XP_021425791.1	gene27208:106566158	XM_014134017.1	XP_013989492.1	LOC106566158	FALSE	FALSE	glutaminase kidney isoform, mitochondrial-like	617	5196	1	protein_coding	XP_021425791.1	gi|929226187|ref|XP_013989492.1|	96.17	496	16	1	1	493	1	496	0	993	XP_021425791.1glutaminasekidneyisoform,mitochondrial-like[Oncorhynchusmykiss];XP_021471307.1glutaminasekidneyisoform,mitochondrial-like[Oncorhynchusmykiss]	XP_021425791.1glutaminasekidneyisoform,mitochondrial-like[Oncorhynchusmykiss];XP_021471307.1glutaminasekidneyisoform,mitochondrial-like[Oncorhynchusmykiss]	3;2	2;1	1;0	;	2	3	2	1	3	3	3	3	2	2	3	3	2	2	3	2	2	2	2	1
XP_021425804.1	gene27219:106566168	XM_014134030.1	XP_013989505.1	cssa12h12orf10	FALSE	FALSE	chromosome ssa12 open reading frame, human C12orf10	410	1462	1	protein_coding	XP_021425804.1	gi|929226209|ref|XP_013989505.1|	95.84	409	16	1	1	408	1	409	0	809	XP_021425804.1UPF0160proteinMYG1,mitochondrial[Oncorhynchusmykiss]	XP_021425804.1UPF0160proteinMYG1,mitochondrial[Oncorhynchusmykiss]	11	11	11		1	11	11	11	9	10	10	10	7	10	10	9	9	8	8	9	10	10	10	7
XP_021425812.1	gene21906:100195319	XM_014124077.1	XP_013979552.1	nup93	FALSE	FALSE	nucleoporin 93	844	2711	1	protein_coding	XP_021425812.1	gi|929123818|ref|XP_013979553.1|	99.15	820	7	0	1	820	12	831	0	1684	XP_021425812.1nuclearporecomplexproteinNup93isoformX3[Oncorhynchusmykiss];XP_021425805.1nuclearporecomplexproteinNup93isoformX3[Oncorhynchusmykiss];XP_021425797.1nuclearporecomplexproteinNup93isoformX2[Oncorhynchusmykiss];XP_021425788.1nuclearporecomplexproteinNup93isoformX1[Oncorhynchusmykiss];XP_021453057.1nuclearporecomplexproteinNup93-likeisoformX2[Oncorhynchusmykiss];XP_021453052.1nuclearpor…	XP_021425812.1nuclearporecomplexproteinNup93isoformX3[Oncorhynchusmykiss];XP_021425805.1nuclearporecomplexproteinNup93isoformX3[Oncorhynchusmykiss];XP_021425797.1nuclearporecomplexproteinNup93isoformX2[Oncorhynchusmykiss];XP_021425788.1nuclearporecomplexproteinNup93isoformX1[Oncorhynchusmykiss];XP_021453057.1nuclearporecomplexproteinNup93-likeisoformX2[Oncorhynchusmykiss];XP_021453052.1nuclearpor…	3;3;3;3;2;2	3;3;3;3;2;2	3;3;3;3;2;2	;;;;;	6	3	3	3	1	2	2	2	2	1	1	2	2	2	2	1	2	2	2	2
XP_021425824.1	gene27246:100136539	NM_001123639.1	NP_001117111.1	LOC100136539	FALSE	FALSE	glycerol-3-phosphate dehydrogenase	350	1713	1	protein_coding	XP_021425824.1	gi|185132114|ref|NP_001117111.1|	99.14	350	3	0	1	350	1	350	0	704	XP_021425824.1glycerol-3-phosphatedehydrogenase[NAD(+)],cytoplasmic-like[Oncorhynchusmykiss]	XP_021425824.1glycerol-3-phosphatedehydrogenase[NAD(+)],cytoplasmic-like[Oncorhynchusmykiss]	19	19	13		1	19	19	13	18	19	18	18	17	18	17	18	17	18	17	18	19	18	18	17
XP_021425827.1	gene44988:106583751	XM_014168307.1	XP_014023782.1	LOC106583751	FALSE	FALSE	mesencephalic astrocyte-derived neurotrophic factor-like	181	1507	1	protein_coding	XP_021425827.1	gi|929293074|ref|XP_014023782.1|	92.27	181	14	0	1	181	1	181	7e-86	315	XP_021425827.1mesencephalicastrocyte-derivedneurotrophicfactor-like[Oncorhynchusmykiss]	XP_021425827.1mesencephalicastrocyte-derivedneurotrophicfactor-like[Oncorhynchusmykiss]	4	3	3		1	4	3	3	4	4	4	4	4	4	4	4	4	4	4	3	3	3	3	3
XP_021425850.1	gene45056:106583814	XM_014168405.1	XP_014023880.1	pdhb	FALSE	TRUE	pyruvate dehydrogenase (lipoamide) beta	388	1717	1	protein_coding	XP_021425850.1	gi|929293264|ref|XP_014023880.1|	96.18	314	12	0	1	314	30	343	0	634	XP_021425850.1pyruvatedehydrogenaseE1componentsubunitbeta,mitochondrial-like,partial[Oncorhynchusmykiss]	XP_021425850.1pyruvatedehydrogenaseE1componentsubunitbeta,mitochondrial-like,partial[Oncorhynchusmykiss]	3	1	1		1	3	1	1	3	3	2	3	2	3	3	3	3	3	3	1	1	0	1	1
XP_021425856.1	gene72344:100380377	NM_001173662.1	NP_001167133.1	acot8	FALSE	TRUE	acyl-CoA thioesterase 8	335	2780	1	protein_coding	XP_021425856.1	gi|291190542|ref|NP_001167133.1|	90.75	335	21	2	1	325	1	335	4e-178	622	XP_021425856.1acyl-coenzymeAthioesterase8[Oncorhynchusmykiss]	XP_021425856.1acyl-coenzymeAthioesterase8[Oncorhynchusmykiss]	5	5	5		1	5	5	5	3	4	5	3	4	3	5	5	4	4	5	3	4	5	3	4
XP_021425868.1	gene27332:106566285	XM_014134175.1	XP_013989650.1	acad9	FALSE	TRUE	acyl-CoA dehydrogenase family, member 9	628	2383	1	protein_coding	XP_021425868.1	gi|929226507|ref|XP_013989650.1|	97.93	628	13	0	1	628	1	628	0	1248	XP_021425868.1acyl-CoAdehydrogenasefamilymember9,mitochondrial[Oncorhynchusmykiss]	XP_021425868.1acyl-CoAdehydrogenasefamilymember9,mitochondrial[Oncorhynchusmykiss]	11	11	11		1	11	11	11	10	9	10	10	8	11	6	7	7	7	9	10	9	10	10	8
XP_021425871.1	gene5577:106595381	XM_014186750.1	XP_014042225.1	LOC106595381	FALSE	TRUE	lysosomal alpha-glucosidase-like	968	6637	1	protein_coding	XP_021425871.1	gi|929070461|ref|XP_014042225.1|	95.95	765	28	2	1	763	1	764	0	1455	XP_021425871.1lysosomalalpha-glucosidase-like[Oncorhynchusmykiss]	XP_021425871.1lysosomalalpha-glucosidase-like[Oncorhynchusmykiss]	9	9	9		1	9	9	9	9	8	9	8	8	8	9	9	9	8	8	9	8	9	8	8
XP_021425913.1	gene56189:106592053	XM_014183355.1	XP_014038830.1	LOC106592053	FALSE	TRUE	venom factor-like	1369	4136	1	protein_coding	XP_021425913.1	gi|929321332|ref|XP_014038830.1|	93.22	413	27	1	1	412	785	1197	0	790	XP_021425913.1complementC3alphachain-like[Oncorhynchusmykiss];XP_021449351.1complementC3alphachain-like[Oncorhynchusmykiss]	XP_021425913.1complementC3alphachain-like[Oncorhynchusmykiss];XP_021449351.1complementC3alphachain-like[Oncorhynchusmykiss]	3;2	3;2	3;2	;	2	3	3	3	3	2	3	2	2	3	3	2	3	2	2	3	2	3	2	2
XP_021425926.1	gene25242:106564391	XM_014130465.1	XP_013985940.1	LOC106564391	FALSE	FALSE	3-mercaptopyruvate sulfurtransferase-like	299	1551	1	protein_coding	XP_021425926.1	gi|929219551|ref|XP_013985940.1|	97.99	299	6	0	1	299	1	299	8e-174	608	XP_021425926.13-mercaptopyruvatesulfurtransferase-like[Oncorhynchusmykiss];XP_021425925.13-mercaptopyruvatesulfurtransferase-like[Oncorhynchusmykiss]	XP_021425926.13-mercaptopyruvatesulfurtransferase-like[Oncorhynchusmykiss];XP_021425925.13-mercaptopyruvatesulfurtransferase-like[Oncorhynchusmykiss]	4;4	4;4	4;4	;	2	4	4	4	3	4	4	4	3	4	4	3	3	3	4	3	4	4	4	3
XP_021425936.1	gene56189:106592053	XM_014183355.1	XP_014038830.1	LOC106592053	FALSE	TRUE	venom factor-like	1369	4136	1	protein_coding	XP_021425936.1	gi|929321332|ref|XP_014038830.1|	79.65	226	39	2	21	239	288	513	9e-84	308	XP_021425936.1complementC3-likeisoformX2[Oncorhynchusmykiss];XP_021425935.1complementC3-likeisoformX1[Oncorhynchusmykiss];XP_021425954.1A.superbusvenomfactor2-like[Oncorhynchusmykiss]	XP_021425936.1complementC3-likeisoformX2[Oncorhynchusmykiss];XP_021425935.1complementC3-likeisoformX1[Oncorhynchusmykiss];XP_021425954.1A.superbusvenomfactor2-like[Oncorhynchusmykiss]	4;4;2	3;3;2	3;3;2	;;	3	4	3	3	4	4	4	4	3	4	4	4	4	4	4	3	3	3	3	2
XP_021425952.1	gene56189:106592053	XM_014183355.1	XP_014038830.1	LOC106592053	FALSE	TRUE	venom factor-like	1369	4136	1	protein_coding	XP_021425952.1	gi|929321332|ref|XP_014038830.1|	95.93	123	5	0	1	123	570	692	9e-63	236	XP_021425952.1venomfactor-like,partial[Oncorhynchusmykiss];XP_021425947.1venomfactor-like[Oncorhynchusmykiss]	XP_021425952.1venomfactor-like,partial[Oncorhynchusmykiss];XP_021425947.1venomfactor-like[Oncorhynchusmykiss]	3;2	3;2	3;2	;	2	3	3	3	3	3	3	3	3	3	3	3	3	3	3	3	3	3	3	3
XP_021425996.1	gene26107:100380459	NM_001173744.1	NP_001167215.1	tmem43	FALSE	FALSE	transmembrane protein 43	401	2468	1	protein_coding	XP_021425996.1	gi|291190240|ref|NP_001167215.1|	98.75	401	5	0	1	401	1	401	0	820	XP_021425996.1transmembraneprotein43[Oncorhynchusmykiss]	XP_021425996.1transmembraneprotein43[Oncorhynchusmykiss]	2	2	2		1	2	2	2	2	1	1	2	2	2	1	2	2	1	2	2	1	1	2	2
XP_021426004.1	gene26113:106565135	XM_014131916.1	XP_013987391.1	slc25a20	FALSE	FALSE	solute carrier family 25 (carnitine/acylcarnitine translocase), member 20	300	1783	1	protein_coding	XP_021426004.1	gi|929222258|ref|XP_013987391.1|	100	300	0	0	1	300	1	300	3e-174	609	XP_021426004.1mitochondrialcarnitine/acylcarnitinecarrierprotein[Oncorhynchusmykiss]	XP_021426004.1mitochondrialcarnitine/acylcarnitinecarrierprotein[Oncorhynchusmykiss]	3	3	3		1	3	3	3	3	3	3	1	3	3	2	3	1	3	3	3	3	3	1	3
XP_021426009.1	gene26121:106565128	XM_014131892.1	XP_013987367.1	LOC106565128	FALSE	FALSE	synaptophysin-like protein 1	234	3032	1	protein_coding	XP_021426009.1	gi|929222214|ref|XP_013987367.1|	92.74	234	17	0	1	234	1	234	3e-124	443	XP_021426009.1synaptophysin-likeprotein1[Oncorhynchusmykiss]	XP_021426009.1synaptophysin-likeprotein1[Oncorhynchusmykiss]	3	3	3		1	3	3	3	3	2	2	3	2	3	2	2	2	2	2	3	2	2	3	2
XP_021426039.1	gene21926:106560829	XM_014124172.1	XP_013979647.1	LOC106560829	FALSE	FALSE	uncharacterized oxidoreductase YKL071W-like	177	815	1	protein_coding	XP_021426039.1	gi|929123999|ref|XP_013979647.1|	93.18	132	9	0	136	267	46	177	5e-71	266	XP_021426039.1uncharacterizedproteinLOC110495012[Oncorhynchusmykiss]	XP_021426039.1uncharacterizedproteinLOC110495012[Oncorhynchusmykiss]	10	10	10		1	10	10	10	10	7	8	9	8	10	7	9	8	10	8	10	7	8	9	8
XP_021426200.1	gene21941:106560816	XM_014124143.1	XP_013979618.1	LOC106560816	FALSE	FALSE	aspartate aminotransferase, mitochondrial-like	427	2875	1	protein_coding	XP_021426200.1	gi|929123945|ref|XP_013979618.1|	98.59	427	6	0	1	427	1	427	0	880	XP_021426200.1aspartateaminotransferase,mitochondrial-like[Oncorhynchusmykiss]	XP_021426200.1aspartateaminotransferase,mitochondrial-like[Oncorhynchusmykiss]	11	9	2		1	11	9	2	10	10	11	11	11	11	10	10	11	10	10	8	8	9	9	9
XP_021426213.1	gene31418:106570285	XM_014142435.1	XP_013997910.1	rpl15	FALSE	FALSE	ribosomal protein L15	204	773	1	protein_coding	XP_021426213.1	gi|929243727|ref|XP_013997910.1|	99.02	204	2	0	1	204	1	204	4e-116	415	XP_021426213.160SribosomalproteinL15isoformX1[Oncorhynchusmykiss];XP_021426212.160SribosomalproteinL15isoformX1[Oncorhynchusmykiss];XP_021415919.160SribosomalproteinL15-like[Oncorhynchusmykiss]	XP_021426213.160SribosomalproteinL15isoformX1[Oncorhynchusmykiss];XP_021426212.160SribosomalproteinL15isoformX1[Oncorhynchusmykiss];XP_021415919.160SribosomalproteinL15-like[Oncorhynchusmykiss]	6;6;6	6;6;6	6;6;6	;;	3	6	6	6	6	5	6	6	6	6	6	6	5	5	6	6	5	6	6	6
XP_021426220.1	gene36885:100196365	NM_001141394.1	NP_001134866.1	rgn	FALSE	FALSE	regucalcin	298	1185	1	protein_coding	XP_021426220.1	gi|213512570|ref|NP_001134866.1|	98.32	298	5	0	1	298	1	298	6e-175	612	XP_021426220.1regucalcinisoformX1[Oncorhynchusmykiss];XP_021452450.1regucalcin-like[Oncorhynchusmykiss]	XP_021426220.1regucalcinisoformX1[Oncorhynchusmykiss]	9;4	9;4	9;4		2	9	9	9	8	8	8	8	8	8	7	7	7	7	9	8	8	8	8	8
XP_021426261.1	gene54426:106594657	XM_014186053.1	XP_014041528.1	LOC106594657	FALSE	TRUE	propionyl-CoA carboxylase alpha chain, mitochondrial-like	711	3336	1	protein_coding	XP_021426261.1	gi|929320241|ref|XP_014041528.1|	98.17	711	13	0	1	711	1	711	0	1452	XP_021426261.1propionyl-CoAcarboxylasealphachain,mitochondrial[Oncorhynchusmykiss];XP_021428641.1propionyl-CoAcarboxylasealphachain,mitochondrial-like[Oncorhynchusmykiss];XP_021426255.1propionyl-CoAcarboxylasealphachain,mitochondrial-like[Oncorhynchusmykiss];XP_021426256.1propionyl-CoAcarboxylasealphachain,mitochondrial-like[Oncorhynchusmykiss]	XP_021426261.1propionyl-CoAcarboxylasealphachain,mitochondrial[Oncorhynchusmykiss];XP_021428641.1propionyl-CoAcarboxylasealphachain,mitochondrial-like[Oncorhynchusmykiss]	12;7;1;1	12;7;1;1	12;7;1;1	;	4	12	12	12	9	9	9	10	8	11	8	8	6	8	9	9	9	9	10	8
XP_021426265.1	gene35906:106574826	XM_014150921.1	XP_014006396.1	LOC106574826	FALSE	TRUE	transmembrane 9 superfamily member 2-like	658	3352	1	protein_coding	XP_021426265.1	gi|929259906|ref|XP_014006396.1|	98.33	300	5	0	1	300	3	302	8e-180	628	XP_021426265.1transmembrane9superfamilymember2-like,partial[Oncorhynchusmykiss];XP_021448289.1transmembrane9superfamilymember2-like[Oncorhynchusmykiss]	XP_021426265.1transmembrane9superfamilymember2-like,partial[Oncorhynchusmykiss];XP_021448289.1transmembrane9superfamilymember2-like[Oncorhynchusmykiss]	3;3	2;2	2;2	;	2	3	2	2	3	2	2	2	2	3	2	2	2	2	2	2	1	1	1	1
XP_021426326.1	gene15059:100196547	NM_001141576.1	NP_001135048.1	pir	FALSE	TRUE	pirin	290	1375	1	protein_coding	XP_021426326.1	gi|213514874|ref|NP_001135048.1|	92.41	290	7	1	1	275	1	290	8e-155	545	XP_021426326.1pirinisoformX2[Oncorhynchusmykiss];XP_021426325.1pirinisoformX1[Oncorhynchusmykiss];XP_021433277.1pirin-like,partial[Oncorhynchusmykiss]	XP_021426326.1pirinisoformX2[Oncorhynchusmykiss];XP_021426325.1pirinisoformX1[Oncorhynchusmykiss];XP_021433277.1pirin-like,partial[Oncorhynchusmykiss]	4;4;3	4;4;3	4;4;3	;;	3	4	4	4	4	3	4	3	4	4	3	3	4	4	4	4	3	4	3	4
XP_021426335.1	gene37063:100195255	XM_014152749.1	XP_014008224.1	rbbp7	FALSE	FALSE	Histone-binding protein RBBP7	427	1976	1	protein_coding	XP_021426335.1	gi|213512621|ref|NP_001133756.1|	100	426	0	0	1	426	1	426	0	884	XP_021426335.1histone-bindingproteinRBBP7[Oncorhynchusmykiss];XP_021426334.1histone-bindingproteinRBBP7isoformX2[Oncorhynchusmykiss];XP_021426332.1histone-bindingproteinRBBP7isoformX1[Oncorhynchusmykiss];XP_021430188.1histone-bindingproteinRBBP4-likeisoformX2[Oncorhynchusmykiss];XP_021440362.1histone-bindingproteinRBBP4isoformX2[Oncorhynchusmykiss];XP_021440361.1histone-bindingproteinRBBP4isoform…	XP_021426335.1histone-bindingproteinRBBP7[Oncorhynchusmykiss];XP_021426334.1histone-bindingproteinRBBP7isoformX2[Oncorhynchusmykiss];XP_021426332.1histone-bindingproteinRBBP7isoformX1[Oncorhynchusmykiss];XP_021430188.1histone-bindingproteinRBBP4-likeisoformX2[Oncorhynchusmykiss];XP_021440362.1histone-bindingproteinRBBP4isoformX2[Oncorhynchusmykiss];XP_021440361.1histone-bindingproteinRBBP4isoform…	8;8;8;4;4;4;4	8;8;8;4;4;4;4	8;8;8;4;4;4;4	;;;;;;	7	8	8	8	6	5	6	6	5	5	5	5	5	4	6	6	5	6	6	5
XP_021426339.1	gene37061:100194802	NM_001139831.1	NP_001133303.1	ap1s2	FALSE	TRUE	adaptor-related protein complex 1, sigma 2 subunit	157	2303	1	protein_coding	XP_021426339.1	gi|213513970|ref|NP_001133303.1|	100	157	0	0	1	157	1	157	4e-87	318	XP_021426339.1AP-1complexsubunitsigma-2[Oncorhynchusmykiss]	XP_021426339.1AP-1complexsubunitsigma-2[Oncorhynchusmykiss]	2	2	1		1	2	2	1	2	1	1	1	1	1	1	1	1	1	1	2	1	1	1	1
XP_021426421.1	gene36717:106575630	XM_014152240.1	XP_014007715.1	LOC106575630	FALSE	FALSE	actin-related protein 2/3 complex subunit 2	299	1623	1	protein_coding	XP_021426421.1	gi|929262496|ref|XP_014007715.1|	99.33	299	2	0	1	299	1	299	5e-176	615	XP_021426421.1actin-relatedprotein2/3complexsubunit2[Oncorhynchusmykiss];XP_021426398.1actin-relatedprotein2/3complexsubunit2[Oncorhynchusmykiss]	XP_021426421.1actin-relatedprotein2/3complexsubunit2[Oncorhynchusmykiss];XP_021426398.1actin-relatedprotein2/3complexsubunit2[Oncorhynchusmykiss]	6;6	6;6	6;6	;	2	6	6	6	6	5	5	6	6	5	6	5	6	6	6	6	5	5	6	6
XP_021426442.1	gene35854:106574769	XM_014150821.1	XP_014006296.1	LOC106574769	FALSE	FALSE	protein jagunal homolog 1-B	183	1298	1	protein_coding	XP_021426442.1	gi|929259722|ref|XP_014006296.1|	99.45	183	1	0	1	183	1	183	2e-104	376	XP_021426442.1proteinjagunalhomolog1-B[Oncorhynchusmykiss];XP_021426441.1proteinjagunalhomolog1-B[Oncorhynchusmykiss];XP_021464006.1proteinjagunalhomolog1-B-like[Oncorhynchusmykiss]	XP_021426442.1proteinjagunalhomolog1-B[Oncorhynchusmykiss];XP_021426441.1proteinjagunalhomolog1-B[Oncorhynchusmykiss];XP_021464006.1proteinjagunalhomolog1-B-like[Oncorhynchusmykiss]	2;2;2	2;2;2	2;2;2	;;	3	2	2	2	2	2	2	2	2	2	2	1	2	2	2	2	2	2	2	2
XP_021426473.1	gene35733:100196881	NM_001141903.1	NP_001135375.1	dylt3	FALSE	FALSE	Dynein light chain Tctex-type 3	114	1586	1	protein_coding	XP_021426473.1	gi|213513380|ref|NP_001135375.1|	99.12	114	1	0	1	114	1	114	4e-62	234	XP_021426473.1dyneinlightchainTctex-type3-like[Oncorhynchusmykiss];XP_021426479.1dyneinlightchainTctex-type3-like[Oncorhynchusmykiss]	XP_021426473.1dyneinlightchainTctex-type3-like[Oncorhynchusmykiss];XP_021426479.1dyneinlightchainTctex-type3-like[Oncorhynchusmykiss]	3;2	3;2	3;2	;	2	3	3	3	3	3	3	3	3	3	3	3	3	3	3	3	3	3	3	3
XP_021426474.1	gene35732:100270807	NM_001145419.1	NP_001138891.1	cybb	FALSE	TRUE	cytochrome b-245, beta polypeptide	565	1698	1	protein_coding	XP_021426474.1	gi|224177473|ref|NP_001138891.1|	98.58	565	8	0	1	565	1	565	0	1163	XP_021426474.1LOWQUALITYPROTEIN:cytochromeb-245heavychain-like[Oncorhynchusmykiss]	XP_021426474.1LOWQUALITYPROTEIN:cytochromeb-245heavychain-like[Oncorhynchusmykiss]	3	3	3		1	3	3	3	3	3	2	1	1	2	1	0	1	0	0	3	3	2	1	1
XP_021426497.1	gene36844:106575751	XM_014152427.1	XP_014007902.1	LOC106575751	FALSE	TRUE	coagulation factor VII-like	414	1653	1	protein_coding	XP_021426497.1	gi|929262843|ref|XP_014007902.1|	92.51	414	29	1	67	478	1	414	0	800	XP_021426497.1coagulationfactorVII-like[Oncorhynchusmykiss];XP_021428691.1coagulationfactorVII-like,partial[Oncorhynchusmykiss]	XP_021426497.1coagulationfactorVII-like[Oncorhynchusmykiss];XP_021428691.1coagulationfactorVII-like,partial[Oncorhynchusmykiss]	6;4	6;4	6;4	;	2	6	6	6	6	4	5	6	4	5	4	5	5	5	5	6	4	5	6	4
XP_021426612.1	gene36785:106575688	XM_014152322.1	XP_014007797.1	LOC106575688	FALSE	FALSE	sorting nexin-4-like	436	2279	1	protein_coding	XP_021426612.1	gi|929262647|ref|XP_014007797.1|	96.33	436	14	1	1	434	1	436	0	872	XP_021426612.1sortingnexin-4-like[Oncorhynchusmykiss];XP_021464137.1sortingnexin-4-like[Oncorhynchusmykiss]	XP_021426612.1sortingnexin-4-like[Oncorhynchusmykiss];XP_021464137.1sortingnexin-4-like[Oncorhynchusmykiss]	2;1	1;1	1;1	;	2	2	1	1	2	2	2	2	2	1	2	2	2	2	2	1	1	1	1	1
XP_021426631.1	gene36878:106575786	XM_014152471.1	XP_014007946.1	LOC106575786	FALSE	FALSE	ubiquitin-like-conjugating enzyme ATG3	312	2331	1	protein_coding	XP_021426631.1	gi|929262936|ref|XP_014007946.1|	98.42	316	1	2	1	316	1	312	1e-173	607	XP_021426631.1ubiquitin-like-conjugatingenzymeATG3[Oncorhynchusmykiss];XP_021426630.1ubiquitin-like-conjugatingenzymeATG3isoformX2[Oncorhynchusmykiss];XP_021426629.1ubiquitin-like-conjugatingenzymeATG3isoformX1[Oncorhynchusmykiss]	XP_021426631.1ubiquitin-like-conjugatingenzymeATG3[Oncorhynchusmykiss];XP_021426630.1ubiquitin-like-conjugatingenzymeATG3isoformX2[Oncorhynchusmykiss];XP_021426629.1ubiquitin-like-conjugatingenzymeATG3isoformX1[Oncorhynchusmykiss]	2;2;2	2;2;2	2;2;2	;;	3	2	2	2	2	2	1	2	2	2	2	2	2	2	2	2	2	1	2	2
XP_021426641.1	gene36881:106575789	XM_014152474.1	XP_014007949.1	LOC106575789	FALSE	FALSE	mitochondrial pyruvate carrier 2-like	131	1282	1	protein_coding	XP_021426641.1	gi|929262940|ref|XP_014007949.1|	99.24	131	1	0	1	131	1	131	1e-72	270	XP_021426641.1mitochondrialpyruvatecarrier2-like[Oncorhynchusmykiss];XP_021426640.1mitochondrialpyruvatecarrier2-like[Oncorhynchusmykiss]	XP_021426641.1mitochondrialpyruvatecarrier2-like[Oncorhynchusmykiss];XP_021426640.1mitochondrialpyruvatecarrier2-like[Oncorhynchusmykiss]	2;2	1;1	1;1	;	2	2	1	1	2	2	2	2	2	2	2	2	2	2	2	1	1	1	1	1
XP_021426667.1	gene36668:106575579	XM_014152171.1	XP_014007646.1	LOC106575579	FALSE	FALSE	adrenodoxin-like	180	2545	1	protein_coding	XP_021426667.1	gi|929262356|ref|XP_014007646.1|	98.35	121	2	0	6	126	60	180	4e-66	247	XP_021426667.1adrenodoxin,mitochondrial-likeisoformX2[Oncorhynchusmykiss];XP_021464188.1adrenodoxin-like[Oncorhynchusmykiss];XP_021426666.1adrenodoxin-likeisoformX1[Oncorhynchusmykiss]	XP_021426667.1adrenodoxin,mitochondrial-likeisoformX2[Oncorhynchusmykiss];XP_021464188.1adrenodoxin-like[Oncorhynchusmykiss];XP_021426666.1adrenodoxin-likeisoformX1[Oncorhynchusmykiss]	2;2;2	2;2;2	2;2;2	;;	3	2	2	2	2	2	2	2	1	2	1	1	1	2	2	2	2	2	2	1
XP_021426673.1	gene36657:100380633	XM_014152158.1	XP_014007633.1	LOC100380633	FALSE	FALSE	sodium/potassium-transporting ATPase subunit alpha-1	1025	3571	1	protein_coding	XP_021426673.1	gi|929262332|ref|XP_014007633.1|	99.9	1025	1	0	1	1025	1	1025	0	2119	XP_021426673.1sodium/potassium-transportingATPasesubunitalpha-1[Oncorhynchusmykiss];XP_021426674.1sodium/potassium-transportingATPasesubunitalpha-1-like[Oncorhynchusmykiss];XP_021427657.1sodium/potassium-transportingATPasesubunitalpha-3[Oncorhynchusmykiss];XP_021451346.1sodium/potassium-transportingATPasesubunitalpha-3-like[Oncorhynchusmykiss];XP_021444434.1sodium/potassium-transportingATPasesubu…	XP_021426673.1sodium/potassium-transportingATPasesubunitalpha-1[Oncorhynchusmykiss]	26;12;9;6;6;5;4;2;2;1;1	26;12;9;6;6;5;4;2;2;1;1	26;12;9;6;6;5;4;2;2;1;1		11	26	26	26	24	22	21	23	23	25	23	23	23	21	23	24	22	21	23	23
XP_021426686.1	gene36562:106575469	XM_014151976.1	XP_014007451.1	LOC106575469	FALSE	FALSE	uncharacterized LOC106575469	292	933	1	protein_coding	XP_021426686.1	gi|929261990|ref|XP_014007451.1|	77.14	210	43	2	1	205	16	225	1e-84	312	XP_021426686.1pregnancy-specificbeta-1-glycoprotein2-likeisoformX4[Oncorhynchusmykiss];XP_021426684.1pregnancy-specificbeta-1-glycoprotein2-likeisoformX2[Oncorhynchusmykiss];XP_021426683.1pregnancy-specificbeta-1-glycoprotein2-likeisoformX2[Oncorhynchusmykiss];XP_021426682.1pregnancy-specificbeta-1-glycoprotein2-likeisoformX1[Oncorhynchusmykiss];XP_021426681.1uncharacterizedproteinLOC110495661iso…	XP_021426686.1pregnancy-specificbeta-1-glycoprotein2-likeisoformX4[Oncorhynchusmykiss];XP_021426684.1pregnancy-specificbeta-1-glycoprotein2-likeisoformX2[Oncorhynchusmykiss];XP_021426683.1pregnancy-specificbeta-1-glycoprotein2-likeisoformX2[Oncorhynchusmykiss];XP_021426682.1pregnancy-specificbeta-1-glycoprotein2-likeisoformX1[Oncorhynchusmykiss];XP_021426681.1uncharacterizedproteinLOC110495661iso…	4;4;4;4;4;4;3;3;3;3;3;3;3;3;2;1;1	1;1;1;1;1;1;1;1;1;1;1;1;1;1;0;0;0	0;0;0;0;0;0;0;0;0;0;0;0;0;0;0;0;0	;;;;;;;;;;;;;;	17	4	1	0	4	4	4	4	4	3	4	4	3	4	4	1	1	1	1	1
XP_021426697.1	gene36592:106575500	XM_014152014.1	XP_014007489.1	LOC106575500	FALSE	FALSE	ATP-dependent RNA helicase DDX3X-like	745	5474	1	protein_coding	XP_021426697.1	gi|929262075|ref|XP_014007495.1|	99.02	711	7	0	1	711	1	711	0	1449	XP_021426697.1ATP-dependentRNAhelicaseDDX3X-likeisoformX3[Oncorhynchusmykiss];XP_021426696.1putativeATP-dependentRNAhelicasePl10isoformX2[Oncorhynchusmykiss];XP_021464224.1ATP-dependentRNAhelicaseDDX3X-like[Oncorhynchusmykiss];XP_021426698.1ATP-dependentRNAhelicaseDDX3X-likeisoformX4[Oncorhynchusmykiss];XP_021426695.1putativeATP-dependentRNAhelicasePl10isoformX1[Oncorhynchusmykiss]	XP_021426697.1ATP-dependentRNAhelicaseDDX3X-likeisoformX3[Oncorhynchusmykiss];XP_021426696.1putativeATP-dependentRNAhelicasePl10isoformX2[Oncorhynchusmykiss];XP_021464224.1ATP-dependentRNAhelicaseDDX3X-like[Oncorhynchusmykiss];XP_021426698.1ATP-dependentRNAhelicaseDDX3X-likeisoformX4[Oncorhynchusmykiss];XP_021426695.1putativeATP-dependentRNAhelicasePl10isoformX1[Oncorhynchusmykiss]	14;14;13;13;13	6;6;6;6;6	6;6;6;6;6	;;;;	5	14	6	6	14	14	14	14	14	14	13	14	14	13	13	6	6	6	6	6
XP_021426712.1	gene21981:100136562	NM_001123656.1	NP_001117128.1	tpm1	FALSE	FALSE	tropomyosin 1 (alpha)	284	1137	1	protein_coding	XP_021426712.1	gi|929125189|ref|XP_013980251.1|	100	284	0	0	1	284	1	284	7e-152	535	XP_021426712.1tropomyosinalpha-1chain-likeisoformX3[Oncorhynchusmykiss];XP_021426702.1tropomyosinalpha-1chain-likeisoformX2[Oncorhynchusmykiss];XP_021426693.1tropomyosinalpha-1chain-likeisoformX1[Oncorhynchusmykiss];XP_021463443.1tropomyosinalpha-1chain-likeisoformX2[Oncorhynchusmykiss];XP_021463436.1tropomyosinalpha-1chainisoformX2[Oncorhynchusmykiss];XP_021463442.1tropomyosinalpha-1chain-likeis…	XP_021426712.1tropomyosinalpha-1chain-likeisoformX3[Oncorhynchusmykiss];XP_021426702.1tropomyosinalpha-1chain-likeisoformX2[Oncorhynchusmykiss];XP_021426693.1tropomyosinalpha-1chain-likeisoformX1[Oncorhynchusmykiss];XP_021463443.1tropomyosinalpha-1chain-likeisoformX2[Oncorhynchusmykiss];XP_021463436.1tropomyosinalpha-1chainisoformX2[Oncorhynchusmykiss];XP_021463442.1tropomyosinalpha-1chain-likeis…	7;7;7;6;6;6;6;6;6;6;6;5;5;5;5;5;5;5;5;5;5;5;5;5;5;5;5;5;5	3;3;3;2;2;2;2;2;2;2;2;1;1;1;1;1;1;1;1;1;1;1;1;1;1;1;1;1;1	3;3;3;2;2;2;2;2;2;2;2;1;1;1;1;1;1;1;1;1;1;1;1;1;1;1;1;1;1	;;;;;;;;;;;;;;;;;;;;;;;;;;;;	29	7	3	3	5	7	6	6	7	4	5	4	5	5	5	1	3	3	2	3
XP_021426754.1	gene35673:106574565	XM_014150549.1	XP_014006024.1	fndc3b	FALSE	FALSE	fibronectin type III domain containing 3B	1157	8599	1	protein_coding	XP_021426754.1	gi|929259226|ref|XP_014006024.1|	90.62	1215	52	8	1	1211	1	1157	0	2191	XP_021426754.1fibronectintypeIIIdomain-containingprotein3B[Oncorhynchusmykiss]	XP_021426754.1fibronectintypeIIIdomain-containingprotein3B[Oncorhynchusmykiss]	9	9	7		1	9	9	7	8	9	7	8	7	8	7	9	7	8	7	8	9	7	8	7
XP_021426760.1	gene35679:106574468	XM_014150366.1	XP_014005841.1	LOC106574468	FALSE	FALSE	propionyl-CoA carboxylase beta chain, mitochondrial-like	560	1855	1	protein_coding	XP_021426760.1	gi|929258881|ref|XP_014005841.1|	98.21	560	10	0	1	560	1	560	0	1139	XP_021426760.1propionyl-CoAcarboxylasebetachain,mitochondrial-like[Oncorhynchusmykiss];XP_021426758.1propionyl-CoAcarboxylasebetachain,mitochondrial-like[Oncorhynchusmykiss]	XP_021426760.1propionyl-CoAcarboxylasebetachain,mitochondrial-like[Oncorhynchusmykiss];XP_021426758.1propionyl-CoAcarboxylasebetachain,mitochondrial-like[Oncorhynchusmykiss]	13;13	13;13	13;13	;	2	13	13	13	11	10	11	10	10	11	13	13	11	12	12	11	10	11	10	10
XP_021426769.1	gene35669:106574475	XM_014150378.1	XP_014005853.1	LOC106574475	FALSE	FALSE	ELAV-like protein 1	353	2456	1	protein_coding	XP_021426769.1	gi|929258906|ref|XP_014005854.1|	99.71	342	1	0	1	342	1	342	0	712	XP_021426769.1ELAV-likeprotein1isoformX2[Oncorhynchusmykiss];XP_021426764.1ELAV-likeprotein1isoformX2[Oncorhynchusmykiss];XP_021426768.1ELAV-likeprotein1isoformX1[Oncorhynchusmykiss];XP_021426766.1ELAV-likeprotein1isoformX1[Oncorhynchusmykiss];XP_021426763.1ELAV-likeprotein1isoformX1[Oncorhynchusmykiss];XP_021459096.1ELAV-likeprotein1isoformX2[Oncorhynchusmykiss];XP_021459095.1ELAV-likeprotein1is…	XP_021426769.1ELAV-likeprotein1isoformX2[Oncorhynchusmykiss];XP_021426764.1ELAV-likeprotein1isoformX2[Oncorhynchusmykiss];XP_021426768.1ELAV-likeprotein1isoformX1[Oncorhynchusmykiss];XP_021426766.1ELAV-likeprotein1isoformX1[Oncorhynchusmykiss];XP_021426763.1ELAV-likeprotein1isoformX1[Oncorhynchusmykiss];XP_021459096.1ELAV-likeprotein1isoformX2[Oncorhynchusmykiss];XP_021459095.1ELAV-likeprotein1is…	5;5;5;5;5;4;4;4;4;3;3;2;2	5;5;5;5;5;4;4;4;4;3;3;2;2	5;5;5;5;5;4;4;4;4;3;3;2;2	;;;;;;;;;;	13	5	5	5	4	5	5	5	4	5	5	3	4	5	4	4	5	5	5	4
XP_021426771.1	gene36501:106575419	XM_014151919.1	XP_014007394.1	LOC106575419	FALSE	FALSE	neutral cholesterol ester hydrolase 1-like	417	2001	1	protein_coding	XP_021426771.1	gi|929261859|ref|XP_014007394.1|	96.2	342	13	0	1	342	76	417	0	653	XP_021426771.1neutralcholesterolesterhydrolase1-like[Oncorhynchusmykiss]	XP_021426771.1neutralcholesterolesterhydrolase1-like[Oncorhynchusmykiss]	10	10	9		1	10	10	9	9	10	9	8	7	10	8	7	8	9	8	9	10	9	8	7
XP_021426773.1	gene35673:106574565	XM_014150549.1	XP_014006024.1	fndc3b	FALSE	FALSE	fibronectin type III domain containing 3B	1157	8599	1	protein_coding	XP_021426773.1	gi|929259226|ref|XP_014006024.1|	69.16	321	49	4	23	297	841	1157	2e-115	414	XP_021426773.1fibronectintypeIIIdomain-containingprotein3B-like[Oncorhynchusmykiss]	XP_021426773.1fibronectintypeIIIdomain-containingprotein3B-like[Oncorhynchusmykiss]	3	1	1		1	3	1	1	3	2	2	2	3	1	2	2	1	2	1	1	0	0	0	1
[truncated: 2,438 more rows]
[truncated: 97 more columns]

## Sheet: Table S2 - Imputated Data
O. mykiss NCBI accession	S. salar NCBI accession	S. salar protein product	AS_L1	AS_L10	AS_L3	AS_L5	AS_L6	AS_L9	PBS_L1	PBS_L3	PBS_L5	PBS_L7	PBS_L9
XP_021411831.1	XP_014049477.1	band 3 anion exchange protein	24.7212	24.8667	24.4831	25.0985	24.288	24.4554	24.7316	24.5193	24.9353	24.8257	24.6387
XP_021411842.1	NP_001134716.1	Nucleoside diphosphate kinase A	27.8107	27.6289	27.6441	27.9962	27.2911	28.4049	27.5328	27.3012	27.3886	27.864	27.5896
XP_021411949.1	XP_014049536.1	coactivator-associated arginine methyltransferase 1	22.6706	23.0248	22.3728	22.7365	22.4848	22.6648	22.5609	22.5304	22.6007	22.5682	22.4797
[truncated: 2,430 more rows]

## Sheet: Table S3 - Immune Statistics
Table S3. Column A: Accession number from protein identified in MaxQuant using O. mykiss database. Accession number of identified proteins from BLASTp of O. mykiss proteins as a query against S. salar (Column B) and protein product (Column C). Columns D & E: Mean of log-2 transformed and imputed LFQ values for each group, AS (n=6), PBS (n=5). Columns F: Log-2 fold change for AS vs PBS comparison,…
[truncated: 2,454 more rows]

[truncated: 4 more sheets: Table S4 - GOBP, Table S5 - GOBP Cont. Proteins, Table S6 - GOslim Cont. Protein, Table S7 - STRING abbreviations]
